# Supplementary material
Source: MDPI journal article supplement (https://www.mdpi.com/1424-8247/14/9/851)
Supplement: s1 [file s1]

# Improved HDAC Inhibition, Stronger Cytotoxic Effect and Higher Selectivity against Leukemias and Lymphomas of Novel, Tricyclic Vorinostat Analogues

Bartosz Bieszczad,<sup>1,†</sup> Damian Garbicz,<sup>1,†</sup> Marta Świtalska,<sup>2</sup> Marta K. Dudek,<sup>3</sup>  
Dawid Warszzycki,<sup>4</sup> Joanna Wietrzyk,<sup>2</sup> Elżbieta Grzesiuk <sup>1,\*</sup> and Adam Mieczkowski <sup>1,\*</sup>

1 Institute of Biochemistry and Biophysics, Polish Academy of Sciences, 02-106 Warsaw, Poland; b.bieszczad@ibb.waw.pl (B.B.)

2 Hirszfeld Institute of Immunology and Experimental Therapy, Polish Academy of Sciences, 53-114 Wrocław, Poland; marta.switalska@hirszfeld.pl (M.Ś), joanna.wietrzyk@hirszfeld.pl (J.W.)

3 Centre of Molecular and Macromolecular Studies, Polish Academy of Sciences, 90-363 Lodz, Poland; mdudek@cbmm.lodz.pl

4 Maj Institute of Pharmacology, Polish Academy of Sciences, 31-343 Cracow, Poland; warszyc@if-pan.krakow.pl

\* Correspondence: elag@ibb.waw.pl (E.G.); amiecz@ibb.waw.pl (A.M.); Tel.: +48-22-592-3506 (A.M.)

† These authors contributed equally to this work.

## 1. Materials and Methods

### 1.1. *In silico* modelling

**Table S1.** Glide Score for the best scored pose (the lower the better) for every compound in seven different HDAC crystals (PDBids given in parenthesis).

| Compound | HDAC1<br>(5ICN) | HDAC2<br>(4LXZ) | HDAC3<br>(4A69) | HDAC4<br>(2VQM) | HDAC6<br>(5EDU) | HDAC7<br>(3C0Z) | HDAC8<br>(1T69) |
|----------|-----------------|-----------------|-----------------|-----------------|-----------------|-----------------|-----------------|
| 7a       | -2.752          | not docked      | not docked      | -2.938          | not docked      | -2.412          | -3.697          |
| 7b       | -5.643          | -2.555          | not docked      | -4.142          | -5.169          | -4.862          | -3.737          |
| 7c       | -6.712          | -4.997          | not docked      | -4.210          | -8.164          | -5.751          | -7.762          |
| 7d       | -7.615          | -7.028          | not docked      | -5.237          | -8.593          | -6.613          | -8.860          |
| 7e       | -8.642          | -7.826          | not docked      | -6.567          | -8.517          | -7.324          | -9.251          |
| 7f       | -8.477          | -6.260          | not docked      | -5.816          | -8.277          | -6.883          | -8.472          |
| 7g       | -2.994          | -1.488          | not docked      | -3.413          | -3.831          | -4.057          | -4.118          |
| 7h       | -6.009          | -3.531          | not docked      | -3.817          | -7.035          | -6.403          | -4.786          |
| 7i       | -6.173          | -4.353          | not docked      | -4.429          | -8.649          | -6.583          | -8.015          |
| 7j       | -8.655          | -7.077          | not docked      | -5.092          | -8.490          | -7.329          | -8.232          |
| 7k       | -8.363          | -8.129          | not docked      | -6.245          | -8.368          | -7.152          | -8.839          |
| 7l       | -8.161          | -7.568          | not docked      | -5.701          | -7.988          | -7.074          | -8.634          |
| 7m       | -8.585          | -6.634          | not docked      | -5.843          | -8.663          | -6.930          | -8.532          |
| 7n       | -8.470          | -6.525          | not docked      | -5.582          | -8.442          | -6.800          | -8.754          |
| 7o       | -7.927          | -7.892          | not docked      | -5.789          | -8.430          | -7.425          | -8.423          |

|            |        |        |            |        |        |        |        |
|------------|--------|--------|------------|--------|--------|--------|--------|
| <b>7p</b>  | -8.653 | -7.679 | not docked | -6.143 | -8.607 | -7.134 | -8.038 |
| <b>7r</b>  | -7.790 | -7.353 | not docked | -6.138 | -8.533 | -6.909 | -8.374 |
| <b>7s</b>  | -9.187 | -7.644 | not docked | -6.446 | -8.183 | -7.354 | -8.675 |
| <b>7t</b>  | -8.411 | -7.450 | not docked | -6.690 | -9.083 | -6.775 | -9.070 |
| Vorinostat | -5.259 | -5.777 | -3.798     | -3.625 | -6.043 | -3.961 | -5.736 |

## 2. Synthetic procedures and physicochemical data

### 2.1 General procedure for alkylation of 8-membered lactams

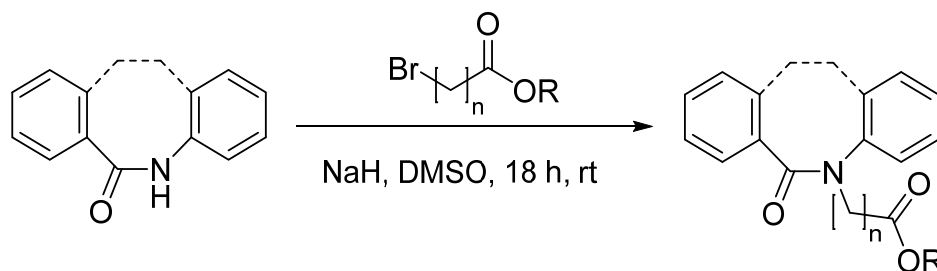

To a solution of appropriate heterocyclic amide (1.0 equiv.) in anhydrous DMSO (5 mL/mmol), 60% sodium hydride in mineral oil (1.5 equiv.) was added and the resulting mixture was stirred for 30 min. After the addition of alkyl halide (1.5 equiv.) the reaction mixture was stirred for 18 hrs at room temperature, then was poured into water and the crude product was extracted with ethyl acetate (3 x 50 mL). The organic phase was washed with brine (1 x 50 mL) and dried over anhydrous magnesium sulfate. The crude product was purified by column chromatography (hexane:ethyl acetate; gradient).

*ethyl 2-(11-methyl-6,12-dioxo-11,12-dihydrodibenzo[b,f][1,5]diazocin-5(6H)-yl)acetate (10a)*: Yield: 78 %, white crystals, mp 125.0-126.0 °C, Rf = 0.33 (hexane:ethyl acetate 1:1). <sup>1</sup>H NMR (500 MHz, CDCl<sub>3</sub>) δ 7.31 – 7.12 (m, 7H, H<sub>Ar</sub>), 7.04 (d, J = 8.0 Hz, 1H, H<sub>Ar</sub>), 4.56 (d, J = 17.1 Hz, 1H, H<sub>CH</sub>), 4.32 (d, J = 17.1 Hz, 1H, H<sub>CH</sub>), 4.29 – 4.16 (m, 2H, H<sub>CH2</sub>), 3.41 (s, 3H, H<sub>CH3</sub>), 1.26 (t, J = 7.2 Hz, 3H, H<sub>CH3</sub>); <sup>13</sup>C NMR (126 MHz, CDCl<sub>3</sub>) δ 168.6, 168.4, 168.1, 140.5, 139.5, 134.8, 133.8, 131.0, 131.0, 128.7, 128.4, 128.0, 128.0, 125.3, 125.2, 61.8, 51.6, 36.9, 14.3; HRMS (ESI): m/z [M+H]<sup>+</sup> calcd for C<sub>19</sub>H<sub>19</sub>N<sub>2</sub>O<sub>4</sub>: 339.13393, found: 339.13334.

*ethyl 3-(11-methyl-6,12-dioxo-11,12-dihydrodibenzo[b,f][1,5]diazocin-5(6H)-yl)propanoate (10b)*: Yield 85 %, white crystals, mp 124.0-125.0 °C, Rf = 0.35 (hexane:ethyl acetate 1:1). <sup>1</sup>H NMR (500 MHz, CDCl<sub>3</sub>) δ 7.32 – 7.23 (m, 4H, H<sub>Ar</sub>), 7.23 – 7.15 (m, 2H, H<sub>Ar</sub>), 7.07 (dd, J = 17.2, 8.0 Hz, 2H, H<sub>Ar</sub>), 4.75 (ddd, J = 13.6, 9.8, 6.1 Hz, 1H, H<sub>CH</sub>), 4.09 (q, J = 7.1 Hz, 2H, H<sub>CH2</sub>), 3.62 (ddd, J = 13.6, 9.8, 5.4 Hz, 1H, H<sub>CH</sub>), 3.42 (s, 3H, H<sub>CH3</sub>), 2.70 (ddd, J = 16.1, 9.7, 6.1 Hz, 1H, H<sub>CH</sub>), 2.53 (ddd, J = 16.4, 9.8, 5.4 Hz, 1H, H<sub>CH</sub>), 1.20 (t, J = 7.2 Hz, 3H, H<sub>CH3</sub>); <sup>13</sup>C NMR (126 MHz, CDCl<sub>3</sub>) δ 171.1, 168.2, 167.8, 140.4, 138.7, 135.5, 134.6, 131.0, 130.8, 128.7, 128.4, 127.6, 127.6, 125.9, 125.3, 60.7, 45.0, 36.7, 32.4, 14.2; HRMS (ESI): m/z [M+H]<sup>+</sup> calcd for C<sub>20</sub>H<sub>21</sub>N<sub>2</sub>O<sub>4</sub>: 339.13393, found: 339.13333.

*ethyl 4-(11-methyl-6,12-dioxo-11,12-dihydrodibenzo[b,f][1,5]diazocin-5(6H)-yl)butanoate (10c)*: Yield: 83 %, white crystals, mp 89.0-90.0 °C, Rf = 0.28 (hexane:ethyl acetate 1:1). <sup>1</sup>H NMR (500 MHz, CDCl<sub>3</sub>) δ 7.31 – 7.22 (m, 4H, H<sub>Ar</sub>), 7.18 (qd, J = 7.6, 1.2 Hz, 2H, H<sub>Ar</sub>), 7.09 – 7.03 (m, 2H, H<sub>Ar</sub>), 4.48 (ddd, J = 13.4, 8.4, 7.3 Hz, 1H, H<sub>CH</sub>), 4.09 (qd, J = 7.1, 1.4 Hz, 2H, H<sub>CH2</sub>), 3.51 – 3.37 (m, 4H, H<sub>CH</sub>+H<sub>CH3</sub>), 2.34 (t, J = 7.2 Hz, 2H, H<sub>CH2</sub>), 1.94 – 1.76 (m, 2H, H<sub>CH2</sub>), 1.21 (t, J = 7.2 Hz, 3H, H<sub>CH3</sub>); <sup>13</sup>C NMR (126 MHz, CDCl<sub>3</sub>) δ 172.8, 168.3, 168.0, 140.3, 138.9, 135.5, 134.8, 130.9, 130.7, 128.5, 128.4, 127.7, 127.5, 125.8, 125.2, 60.5, 48.3, 36.7, 31.4, 23.2, 14.3; **HRMS (ESI)**: m/z [M+H]<sup>+</sup> calcd for C<sub>21</sub>H<sub>23</sub>N<sub>2</sub>O<sub>4</sub>: 367.16523, found: 367.16461.

*methyl 5-(11-methyl-6,12-dioxo-11,12-dihydrodibenzo[b,f][1,5]diazocin-5(6H)-yl)pentanoate (10d)*: Yield: 80 %, white crystals, mp 107.0-108.0 °C, Rf = 0.25 (hexane:ethyl acetate 1:1). <sup>1</sup>H NMR (500 MHz, CDCl<sub>3</sub>) δ 7.34 – 7.22 (m, 4H, H<sub>Ar</sub>), 7.22 – 7.14 (m, 2H, H<sub>Ar</sub>), 7.06 (t, J = 7.6 Hz, 2H, H<sub>Ar</sub>), 4.51 (dt, J = 13.4, 7.7 Hz, 1H, H<sub>CH</sub>), 3.62 (s, 3H, H<sub>CH3</sub>), 3.43 (s, 3H, H<sub>CH3</sub>), 3.32 (ddd, J = 13.1, 7.8, 5.2 Hz, 1H, H<sub>CH</sub>), 2.44 – 2.24 (m, 2H, H<sub>CH2</sub>), 1.75 – 1.44 (m, 4H, 2xH<sub>CH2</sub>); <sup>13</sup>C NMR (126 MHz, CDCl<sub>3</sub>) δ 173.9, 168.4, 167.8, 140.4, 139.0, 135.6, 134.9, 130.9, 130.7, 128.5, 128.4, 127.7, 127.6, 125.9, 125.2, 51.6, 48.7, 36.7, 33.6, 27.3, 22.3; **HRMS (ESI)**: m/z [M+H]<sup>+</sup> calcd for C<sub>21</sub>H<sub>23</sub>N<sub>2</sub>O<sub>4</sub>: 367.16523, found: 367.16457.

*methyl 6-(11-methyl-6,12-dioxo-11,12-dihydrodibenzo[b,f][1,5]diazocin-5(6H)-yl)hexanoate (10e)*: Yield: 76 %, white crystals, mp 95.0-96.0 °C, Rf = 0.27 (hexane:ethyl acetate 1:1). <sup>1</sup>H NMR (500 MHz, CDCl<sub>3</sub>) δ 7.32 – 7.21 (m, 4H, H<sub>Ar</sub>), 7.18 (qd, J = 7.5, 1.2 Hz, 2H, H<sub>Ar</sub>), 7.05 (dd, J = 7.9, 4.6 Hz, 2H, H<sub>Ar</sub>), 4.49 (ddd, J = 13.4, 9.0, 7.1 Hz, 1H, H<sub>CH</sub>), 3.62 (s, 3H, H<sub>CH3</sub>), 3.42 (s, 3H, H<sub>CH3</sub>), 3.29 (ddd, J = 13.7, 8.9, 5.0 Hz, 1H, H<sub>CH</sub>), 2.27 (t, J = 7.5 Hz, 2H, H<sub>CH2</sub>), 1.69 – 1.44 (m, 4H, 2xH<sub>CH2</sub>), 1.39 – 1.26 (m, 2H, H<sub>CH2</sub>); <sup>13</sup>C NMR (126 MHz, CDCl<sub>3</sub>) δ 174.1, 168.3, 167.7, 140.3, 139.1, 135.6, 134.9, 130.8, 130.6, 128.4, 128.3, 127.6, 127.6, 125.9, 125.2, 51.5, 49.0, 36.7, 34.0, 27.5, 26.4, 24.5; **HRMS (ESI)**: m/z [M+H]<sup>+</sup> calcd for C<sub>22</sub>H<sub>25</sub>N<sub>2</sub>O<sub>4</sub>: 381.18088, found: 381.18028.

*ethyl 7-(11-methyl-6,12-dioxo-11,12-dihydrodibenzo[b,f][1,5]diazocin-5(6H)-yl)heptanoate (10f)*: Yield: 83%, pale oil, Rf = 0.41 (hexane:ethyl acetate 1:1). <sup>1</sup>H NMR (500 MHz, CDCl<sub>3</sub>) δ 7.32 – 7.22 (m, 4H, H<sub>Ar</sub>), 7.18 (qd, J = 7.6, 1.2 Hz, 2H, H<sub>Ar</sub>), 7.05 (t, J = 7.0 Hz, 2H, H<sub>Ar</sub>), 4.48 (ddd, J = 13.3, 9.1, 7.1 Hz, 1H, H<sub>CH</sub>), 4.09 (q, J = 7.1 Hz, 2H, H<sub>CH2</sub>), 3.43 (s, 3H, H<sub>CH3</sub>), 3.28 (ddd, J = 13.6, 9.1, 5.0 Hz, 1H, H<sub>CH</sub>), 2.25 (t, J = 7.6 Hz, 2H, H<sub>CH2</sub>), 1.63 – 1.43 (m, 4H, 2xH<sub>CH2</sub>), 1.37 – 1.27 (m, 4H, 2xH<sub>CH2</sub>), 1.22 (t, J = 7.1 Hz, 3H, H<sub>CH3</sub>); <sup>13</sup>C NMR (126 MHz, CDCl<sub>3</sub>) δ 173.9, 168.4, 167.8, 140.4, 139.2, 135.6, 135.0, 130.9, 130.7, 128.4, 128.4, 127.7, 127.6, 125.9, 125.2, 60.3, 49.2, 36.7, 34.4, 28.9, 27.7, 26.7, 25.1, 14.4; **HRMS (ESI)**: m/z [M+H]<sup>+</sup> calcd for C<sub>24</sub>H<sub>29</sub>N<sub>2</sub>O<sub>4</sub>: 409.21218, found: 409.21156.

*ethyl 2-(6-oxodibenzo[b,f]azocin-5(6H)-yl)acetate (10g)*: Yield: 90 %, white crystals, mp 86.0-87.0 °C, Rf = 0.78 (hexane:ethyl acetate 1:1). <sup>1</sup>H NMR (500 MHz, CDCl<sub>3</sub>) δ 7.45 – 7.33 (m, 2H,

H<sub>CH=CH</sub>), 7.26 – 7.11 (m, 4H, H<sub>Ar</sub>), 7.11 – 7.04 (m, 1H, H<sub>Ar</sub>), 7.03 – 6.93 (m, 2H, H<sub>Ar</sub>), 6.89 (d, *J* = 11.5 Hz, 1H, H<sub>Ar</sub>), 4.57 (d, *J* = 17.0 Hz, 1H, H<sub>CH</sub>), 4.34 – 4.18 (m, 3H, H<sub>CH</sub>+H<sub>CH<sub>2</sub></sub>), 1.30 (t, *J* = 7.2 Hz, 3H, H<sub>CH<sub>3</sub></sub>);

<sup>13</sup>C NMR (126 MHz, CDCl<sub>3</sub>) δ 171.5, 169.0, 141.7, 136.4, 135.4, 133.6, 132.8, 129.9, 129.0, 128.8, 128.7, 127.6, 127.6, 127.5, 127.3, 126.1, 61.4, 52.5, 14.3;

**HRMS (ESI):** *m/z* [M+H]<sup>+</sup> calcd for C<sub>19</sub>H<sub>18</sub>NO<sub>3</sub>: 308.12812, found: 308.12810.

*methyl 3-(6-oxodibenzo[b,f]azocin-5(6H)-yl)propanoate (10h)*: Yield: 90 %, white crystals, mp 89.0-90.0 °C, R<sub>f</sub> = 0.57 (hexane:ethyl acetate 1:1). <sup>1</sup>H NMR (500 MHz, CDCl<sub>3</sub>) δ 7.39 – 7.31 (m, 1H, H<sub>Ar</sub>), 7.25 – 7.12 (m, 5H, H<sub>Ar</sub>), 7.07 (d, *J* = 7.7 Hz, 1H, H<sub>Ar</sub>), 7.00 – 6.90 (m, 2H, H<sub>Ar</sub>), 6.82 (d, *J* = 11.5 Hz, 1H, H<sub>Ar</sub>), 4.74 (ddd, *J* = 13.5, 8.7, 5.9 Hz, 1H, H<sub>CH</sub>), 3.64 – 3.50 (m, 4H, H<sub>CH</sub>+H<sub>CH<sub>3</sub></sub>), 2.67 (ddd, *J* = 16.2, 8.6, 5.9 Hz, 1H, H<sub>CH</sub>), 2.51 (ddd, *J* = 16.2, 8.7, 6.4 Hz, 1H, H<sub>CH</sub>); <sup>13</sup>C NMR (126 MHz, CDCl<sub>3</sub>) δ 171.8, 171.0, 140.9, 137.0, 136.1, 133.5, 133.3, 129.5, 128.9, 128.8, 128.6, 127.7, 127.6, 127.3, 127.2, 127.0, 51.8, 46.5, 32.8; **HRMS (ESI):** *m/z* [M+H]<sup>+</sup> calcd for C<sub>19</sub>H<sub>18</sub>NO<sub>3</sub>: 308.12812, found: 308.12808.

*ethyl 4-(6-oxodibenzo[b,f]azocin-5(6H)-yl)butanoate (10i)*: Yield: 77 %, white crystals, mp 90.0-91.0 °C, R<sub>f</sub> = 0.68 (hexane:ethyl acetate 1:1). <sup>1</sup>H NMR (500 MHz, CDCl<sub>3</sub>) δ 7.39 – 7.31 (m, 1H, H<sub>Ar</sub>), 7.23 – 7.10 (m, 5H, H<sub>Ar</sub>), 7.07 (d, *J* = 7.6 Hz, 1H, H<sub>Ar</sub>), 7.01 – 6.92 (m, 2H, H<sub>Ar</sub>), 6.87 (d, *J* = 11.5 Hz, 1H, H<sub>Ar</sub>), 4.49 (dt, *J* = 13.3, 7.7 Hz, 1H, H<sub>CH</sub>), 4.08 (q, *J* = 7.1 Hz, 2H, H<sub>CH<sub>2</sub></sub>), 3.31 (ddd, *J* = 13.4, 7.7, 5.9 Hz, 1H, H<sub>CH</sub>), 2.47 – 2.24 (m, 2H, H<sub>CH<sub>2</sub></sub>), 1.91 – 1.69 (m, 2H, H<sub>CH<sub>2</sub></sub>), 1.20 (t, *J* = 7.1 Hz, 3H, H<sub>CH<sub>3</sub></sub>); <sup>13</sup>C NMR (126 MHz, CDCl<sub>3</sub>) δ 173.1, 171.1, 141.1, 137.3, 136.1, 133.4, 133.4, 129.6, 128.7, 128.7, 128.6, 127.6, 127.6, 127.2, 127.1, 126.8, 60.4, 49.7, 31.8, 23.2, 14.3; **HRMS (ESI):** *m/z* [M+H]<sup>+</sup> calcd for C<sub>21</sub>H<sub>22</sub>NO<sub>3</sub>: 336.15942, found: 336.15944.

*methyl 5-(6-oxodibenzo[b,f]azocin-5(6H)-yl)pentanoate (10j)*: Yield: 91 %, white crystals, m.p 99.0-100.0 °C, R<sub>f</sub> = 0.60 (hexane:ethyl acetate 1:1). <sup>1</sup>H NMR (500 MHz, CDCl<sub>3</sub>) δ 7.39 – 7.31 (m, 1H, H<sub>Ar</sub>), 7.25 – 7.10 (m, 5H, H<sub>Ar</sub>), 7.08 (d, *J* = 7.6 Hz, 1H, H<sub>Ar</sub>), 7.01 – 6.91 (m, 2H, H<sub>Ar</sub>), 6.86 (d, *J* = 11.4 Hz, 1H, H<sub>Ar</sub>), 4.47 (ddd, *J* = 13.3, 8.5, 6.8 Hz, 1H, H<sub>CH</sub>), 3.63 (s, 3H, H<sub>CH<sub>3</sub></sub>), 3.26 (ddd, *J* = 13.5, 8.4, 5.3 Hz, 1H, H<sub>CH</sub>), 2.29 (td, *J* = 7.5, 1.4 Hz, 2H, H<sub>CH<sub>2</sub></sub>), 1.73 – 1.56 (m, 2H, H<sub>CH<sub>2</sub></sub>), 1.56 – 1.39 (m, 2H, H<sub>CH<sub>2</sub></sub>); <sup>13</sup>C NMR (126 MHz, CDCl<sub>3</sub>) δ 173.9, 171.0, 141.2, 137.4, 136.2, 133.5, 133.3, 129.6, 128.7, 128.6, 128.6, 127.6, 127.6, 127.2, 127.0, 126.9, 51.6, 50.1, 33.8, 27.3, 22.4; **HRMS (ESI):** *m/z* [M+H]<sup>+</sup> calcd for C<sub>21</sub>H<sub>22</sub>NO<sub>3</sub>: 336.15942, found: 336.15931.

*methyl 6-(6-oxodibenzo[b,f]azocin-5(6H)-yl)hexanoate (10k)*: Yield: 82 %, pale oil, R<sub>f</sub> = 0.64 (hexane:ethyl acetate 1:1). <sup>1</sup>H NMR (500 MHz, CDCl<sub>3</sub>) δ 7.38 – 7.31 (m, 1H, H<sub>Ar</sub>), 7.23 – 7.10 (m, 5H, H<sub>Ar</sub>), 7.07 (d, *J* = 7.6 Hz, 1H, H<sub>Ar</sub>), 7.01 – 6.90 (m, 2H, H<sub>Ar</sub>), 6.84 (d, *J* = 11.4 Hz, 1H, H<sub>Ar</sub>), 4.45 (ddd, *J* = 13.3, 8.7, 6.7 Hz, 1H, H<sub>CH</sub>), 3.63 (s, 3H, H<sub>CH<sub>3</sub></sub>), 3.22 (ddd, *J* = 13.6, 9.0, 4.8 Hz, 1H, H<sub>CH</sub>), 2.26 (t, *J* = 7.5 Hz, 2H, H<sub>CH<sub>2</sub></sub>), 1.69 – 1.54 (m, 2H, H<sub>CH<sub>2</sub></sub>), 1.54 – 1.45 (m, 1H, H<sub>CH</sub>), 1.45 – 1.32 (m, 2H, H<sub>CH<sub>2</sub></sub>), 1.31 – 1.21 (m, 1H, H<sub>CH</sub>); <sup>13</sup>C NMR (126 MHz, CDCl<sub>3</sub>) δ 174.1, 170.9,

141.2, 137.4, 136.2, 133.4, 133.2, 129.6, 128.6, 128.6, 128.5, 127.6, 127.5, 127.2, 127.0, 126.9, 51.6, 50.4, 34.0, 27.6, 26.6, 24.7; **HRMS (ESI):**  $m/z$   $[M+H]^+$  calcd for  $C_{22}H_{24}NO_3$ : 350.17507, found: 350.17502.

*ethyl 7-(6-oxodibenzo[b,f]azocin-5(6H)-yl)heptanoate (10l):* Yield: 90 %, pale oil,  $R_f$  = 0.78 (hexane:ethyl acetate 1:1).  **$^1H$  NMR** (500 MHz,  $CDCl_3$ )  $\delta$  7.40 – 7.30 (m, 1H,  $H_{Ar}$ ), 7.24 – 7.10 (m, 5H,  $H_{Ar}$ ), 7.07 (d,  $J$  = 7.6 Hz, 1H,  $H_{Ar}$ ), 7.01 – 6.91 (m, 2H,  $H_{Ar}$ ), 6.84 (d,  $J$  = 11.4 Hz, 1H,  $H_{Ar}$ ), 4.45 (ddd,  $J$  = 13.2, 8.8, 6.6 Hz, 1H,  $H_{CH}$ ), 4.10 (q,  $J$  = 7.1 Hz, 2H,  $H_{CH_2}$ ), 3.22 (ddd,  $J$  = 13.6, 9.1, 4.8 Hz, 1H,  $H_{CH_2}$ ), 2.25 (t,  $J$  = 7.5 Hz, 2H,  $H_{CH_2}$ ), 1.57 (p,  $J$  = 7.4 Hz, 2H,  $H_{CH_2}$ ), 1.53 – 1.44 (m, 1H,  $H_{CH}$ ), 1.44 – 1.32 (m, 2H,  $H_{CH_2}$ ), 1.31 – 1.21 (m, 6H,  $H_{CH}+H_{CH_2}+H_{CH_3}$ );  **$^{13}C$  NMR** (126 MHz,  $CDCl_3$ )  $\delta$  173.9, 170.9, 141.3, 137.5, 136.2, 133.4, 133.3, 129.6, 128.6, 128.6, 128.5, 127.6, 127.6, 127.2, 127.0, 126.9, 60.3, 50.5, 34.3, 29.0, 27.8, 26.7, 25.0, 14.4; **HRMS (ESI):**  $m/z$   $[M+H]^+$  calcd for  $C_{24}H_{28}N_3O$ : 378.20637, found: 378.20618.

*methyl 6-(12-methyl-6,11-dioxo-11,12-dihydrodibenzo[b,f][1,4]diazocin-5(6H)-yl)hexanoate (10m):* Yield: 88 %, white crystals, mp 169.0-170.0 °C,  $R_f$  = 0.29 (hexane:ethyl acetate 1:1).  **$^1H$  NMR** (500 MHz,  $CDCl_3$ )  $\delta$  7.26 – 7.21 (m, 4H,  $H_{Ar}$ ), 7.19 – 7.13 (m, 4H,  $H_{Ar}$ ), 4.46 (ddd,  $J$  = 13.4, 9.5, 6.4 Hz, 1H,  $H_{CH}$ ), 3.60 (s, 3H,  $H_{CH_3}$ ), 3.39 (s, 3H,  $H_{CH_3}$ ), 3.29 (ddd,  $J$  = 13.4, 9.8, 4.6 Hz, 1H,  $H_{CH}$ ), 2.26 (t,  $J$  = 7.4 Hz, 2H,  $H_{CH_2}$ ), 1.69 – 1.49 (m, 3H,  $H_{CH_2}+H_{CH}$ ), 1.48 – 1.25 (m, 3H,  $H_{CH_2}+H_{CH}$ );  **$^{13}C$  NMR** (126 MHz,  $CDCl_3$ )  $\delta$  173.9, 169.7, 169.1, 141.8, 139.5, 133.2, 132.6, 130.2, 130.0, 128.9, 128.8, 127.4, 126.7, 126.5, 126.5, 51.5, 48.9, 36.8, 33.9, 28.1, 26.3, 24.6; **HRMS (ESI):**  $m/z$   $[M+H]^+$  calcd for  $C_{22}H_{25}N_2O_4$ : 381.18088, found: 381.18032.

*methyl 6-(8,9-dichloro-12-methyl-6,11-dioxo-11,12-dihydrodibenzo[b,f][1,4]diazocin-5(6H)-yl)hexanoate (10n):* Yield: 83 %, white crystals, mp 158.0-159.0 °C,  $R_f$  = 0.55 (hexane:ethyl acetate 1:1).  **$^1H$  NMR** (500 MHz,  $CDCl_3$ )  $\delta$  7.35 (d,  $J$  = 6.2 Hz, 2H,  $H_{Ar}$ ), 7.29 – 7.17 (m, 4H,  $H_{Ar}$ ), 4.43 (ddd,  $J$  = 13.5, 9.6, 6.3 Hz, 1H,  $H_{CH}$ ), 3.62 (s, 3H,  $H_{CH_3}$ ), 3.39 (s, 3H,  $H_{CH_3}$ ), 3.30 (ddd,  $J$  = 14.1, 9.8, 4.6 Hz, 1H,  $H_{CH}$ ), 2.27 (t,  $J$  = 7.4 Hz, 2H,  $H_{CH_2}$ ), 1.68 – 1.48 (m, 3H,  $H_{CH_2}+H_{CH}$ ), 1.48 – 1.25 (m, 3H,  $H_{CH_2}+H_{CH}$ );  **$^{13}C$  NMR** (126 MHz,  $CDCl_3$ )  $\delta$  173.9, 167.5, 166.9, 141.3, 139.0, 134.7, 134.5, 132.8, 132.3, 129.4, 129.4, 129.0, 128.7, 127.6, 126.8, 51.6, 49.1, 37.0, 33.9, 28.0, 26.3, 24.6; **HRMS (ESI):**  $m/z$   $[M+H]^+$  calcd for  $C_{22}H_{23}Cl_2N_2O_4$ : 449.10294, 451.09999, found: 449.10243, 451.09958.

*methyl 6-(12-benzyl-6,11-dioxo-11,12-dihydrodibenzo[b,f][1,4]diazocin-5(6H)-yl)hexanoate (10o):* Yield: 78 %, white crystals, mp 148.0-149.0 °C,  $R_f$  = 0.48 (hexane:ethyl acetate 1:1).  **$^1H$  NMR** (500 MHz,  $CDCl_3$ )  $\delta$  7.35 – 7.20 (m, 9H,  $H_{Ar}$ ), 7.18 – 7.04 (m, 4H,  $H_{Ar}$ ), 5.21 (d,  $J$  = 14.3 Hz, 1H,  $H_{Bn}$ ), 4.88 (d,  $J$  = 14.3 Hz, 1H,  $H_{Bn}$ ), 3.65 (s, 3H,  $H_{CH_3}$ ), 3.38 (ddd,  $J$  = 13.5, 10.7, 5.2 Hz, 1H,  $H_{CH}$ ), 2.87 (ddd,  $J$  = 13.6, 10.7, 5.5 Hz, 1H,  $H_{CH}$ ), 2.29 (t,  $J$  = 7.5 Hz, 2H,  $H_{CH_2}$ ), 1.65 – 1.52 (m, 3H,  $H_{CH_2}+H_{CH}$ ), 1.49 – 1.35 (m, 1H,  $H_{CH}$ ), 1.32 – 1.14 (m, 2H,  $H_{CH_2}$ );  **$^{13}C$  NMR** (126 MHz,  $CDCl_3$ )  $\delta$  174.0, 169.5, 169.1, 140.8, 140.0, 137.1, 133.3, 132.7, 130.2, 130.0, 129.14 (2xC), 128.9, 128.9

(2xC), 128.7, 128.0, 127.6, 127.4, 126.5, 126.5, 52.7, 51.6, 49.0, 34.0, 28.1, 26.5, 24.6; **HRMS (ESI)**:  $m/z$  [M+H]<sup>+</sup> calcd for C<sub>28</sub>H<sub>29</sub>N<sub>2</sub>O<sub>4</sub>: 457.21218, found: 457.21159.

*methyl 6-(6-oxo-11,12-dihydrodibenzo[b,f]azocin-5(6H)-yl)hexanoate (10p)*: Yield: 85 %, white crystals, mp 77.0-78.0 °C, Rf = 0.75 (hexane:ethyl acetate 1:1). **<sup>1</sup>H NMR** (500 MHz, CDCl<sub>3</sub>) δ 7.15 (dd,  $J$  = 7.2, 1.7 Hz, 1H, H<sub>Ar</sub>), 7.08 – 6.98 (m, 6H, H<sub>Ar</sub>), 6.87 (d,  $J$  = 7.1 Hz, 1H, H<sub>Ar</sub>), 4.17 (ddd,  $J$  = 13.2, 10.4, 5.6 Hz, 1H, H<sub>CH</sub>), 3.63 (s, 3H, H<sub>CH3</sub>), 3.52 (ddd,  $J$  = 13.2, 10.3, 5.3 Hz, 1H, H<sub>CH</sub>), 3.43 – 3.34 (m, 1H, H<sub>CH</sub>), 3.31 – 3.22 (m, 1H, H<sub>CH</sub>), 2.95 – 2.83 (m, 2H, H<sub>CH2</sub>), 2.29 (t,  $J$  = 7.5 Hz, 2H, H<sub>CH2</sub>), 1.78 – 1.68 (m, 1H, H<sub>CH</sub>), 1.64 (p,  $J$  = 7.6 Hz, 2H, H<sub>CH2</sub>), 1.61 – 1.52 (m, 1H, H<sub>CH</sub>), 1.45 – 1.31 (m, 2H, H<sub>CH2</sub>); **<sup>13</sup>C NMR** (126 MHz, CDCl<sub>3</sub>) δ 174.0, 172.1, 142.2, 138.2, 137.8, 135.4, 130.3, 129.1, 129.0, 127.9, 127.5, 127.0, 126.7, 126.3, 51.5, 49.2, 34.0, 33.0, 30.8, 27.6, 26.7, 24.7; **HRMS (ESI)**:  $m/z$  [M+H]<sup>+</sup> calcd for C<sub>22</sub>H<sub>26</sub>NO<sub>3</sub>: 352.19072, found: 352.19024.

*methyl 6-(2-bromo-11-methyl-6,12-dioxo-11,12-dihydrodibenzo[b,f][1,5]diazocin-5(6H)-yl)hexanoate (10r)*: Yield: 87 %, pale oil, Rf = 0.42 (hexane:ethyl acetate 1:1). **<sup>1</sup>H NMR** (500 MHz, CDCl<sub>3</sub>) δ 7.43 (d,  $J$  = 2.3 Hz, 1H, H<sub>Ar</sub>), 7.39 (dd,  $J$  = 8.5, 2.3 Hz, 1H, H<sub>Ar</sub>), 7.35 – 7.18 (m, 3H, H<sub>Ar</sub>), 7.08 (d,  $J$  = 8.0 Hz, 1H, H<sub>Ar</sub>), 6.95 (d,  $J$  = 8.5 Hz, 1H, H<sub>Ar</sub>), 4.49 (ddd,  $J$  = 13.4, 9.0, 7.1 Hz, 1H, H<sub>CH</sub>), 3.64 (s, 3H, H<sub>CH3</sub>), 3.42 (s, 3H, H<sub>CH3</sub>), 3.25 (ddd,  $J$  = 13.7, 8.9, 5.0 Hz, 1H, H<sub>CH</sub>), 2.29 (t,  $J$  = 7.5 Hz, 2H, H<sub>CH2</sub>), 1.69 – 1.59 (m, 2H, H<sub>CH2</sub>), 1.59 – 1.45 (m, 2H, H<sub>CH2</sub>), 1.38 – 1.28 (m, 2H, H<sub>CH2</sub>); **<sup>13</sup>C NMR** (126 MHz, CDCl<sub>3</sub>) δ 174.1, 167.5, 166.8, 140.0, 138.2, 137.3, 134.7, 134.0, 131.0, 130.7, 128.7, 127.7, 127.6, 125.4, 122.0, 51.6, 49.1, 36.8, 34.1, 27.5, 26.4, 24.6; **HRMS (ESI)**:  $m/z$  [M+H]<sup>+</sup> calcd for C<sub>22</sub>H<sub>24</sub>BrN<sub>2</sub>O<sub>4</sub>: 459.09140, 461.08935, found: 459.09106, 461.08887.

*methyl 6-(2,3-dimethoxy-11-methyl-6,12-dioxo-11,12-dihydrodibenzo[b,f][1,5]diazocin-5(6H)-yl)hexanoate (10s)*: Yield: 74 %, white crystals, mp 115.0-116.0 °C, Rf = 0.15 (hexane:ethyl acetate 1:1). **<sup>1</sup>H NMR** (500 MHz, CDCl<sub>3</sub>) δ 7.31 – 7.21 (m, 2H, H<sub>Ar</sub>), 7.18 (td,  $J$  = 7.5, 1.2 Hz, 1H, H<sub>Ar</sub>), 7.02 (d,  $J$  = 8.0 Hz, 1H, H<sub>Ar</sub>), 6.72 (s, 1H, H<sub>Ar</sub>), 6.45 (s, 1H, H<sub>Ar</sub>), 4.48 (ddd,  $J$  = 13.3, 8.8, 7.2 Hz, 1H, H<sub>CH</sub>), 3.76 (d,  $J$  = 2.4 Hz, 6H, H<sub>OCH3</sub>), 3.60 (s, 3H, H<sub>CH3</sub>), 3.38 (s, 3H, H<sub>CH3</sub>), 3.17 (ddd,  $J$  = 13.5, 8.8, 4.9 Hz, 1H, H<sub>CH</sub>), 2.26 (t,  $J$  = 7.5 Hz, 2H, H<sub>CH2</sub>), 1.66 – 1.56 (m, 2H, H<sub>CH2</sub>), 1.55 – 1.41 (m, 2H, H<sub>CH2</sub>), 1.36 – 1.25 (m, 2H, H<sub>CH2</sub>); **<sup>13</sup>C NMR** (126 MHz, CDCl<sub>3</sub>) δ 174.1, 168.3, 167.9, 150.5, 148.6, 140.6, 134.8, 132.1, 130.6, 128.2, 127.6, 127.5, 125.1, 109.3, 108.4, 56.2, 56.0, 51.5, 48.9, 36.8, 34.0, 27.4, 26.4, 24.6; **HRMS (ESI)**:  $m/z$  [M+H]<sup>+</sup> calcd for C<sub>24</sub>H<sub>29</sub>N<sub>2</sub>O<sub>6</sub>: 441.20201, found: 441.20158.

*methyl 6-(5-methyl-6,14-dioxo-5,14-dihydrobenzonaphtho[2,3-f][1,5]diazocin-13(6H)-yl)hexanoate (10t)*: Yield: 69 %, white crystals, mp 198.0-199.0 °C, Rf = 0.43 (hexane:ethyl acetate 1:1). **<sup>1</sup>H NMR** (500 MHz, CDCl<sub>3</sub>) δ 7.84 (s, 1H, H<sub>Ar</sub>), 7.82 – 7.70 (m, 2H, H<sub>Ar</sub>), 7.57 (s, 1H, H<sub>Ar</sub>), 7.50 (pd,  $J$  = 6.9, 1.4 Hz, 2H, H<sub>Ar</sub>), 7.27 (d,  $J$  = 2.4 Hz, 1H, H<sub>Ar</sub>), 7.16 (dd,  $J$  = 8.6, 2.4 Hz, 1H, H<sub>Ar</sub>), 7.01 (d,  $J$  = 8.6 Hz, 1H, H<sub>Ar</sub>), 4.53 (ddd,  $J$  = 13.3, 9.1, 6.9 Hz, 1H, H<sub>CH</sub>), 3.63 (s, 3H, H<sub>CH3</sub>), 3.50 – 3.40 (m, 4H, H<sub>CH3</sub>+H<sub>CH</sub>), 2.28 (t,  $J$  = 7.5 Hz, 2H, H<sub>CH2</sub>), 1.67 – 1.49 (m, 4H, 2xH<sub>CH2</sub>), 1.42 – 1.28 (m, 2H,

$\text{H}_{\text{CH}_2}$ );  $^{13}\text{C}$  NMR (126 MHz,  $\text{CDCl}_3$ )  $\delta$  174.1, 168.3, 166.6, 138.6, 136.9, 136.5, 134.2, 133.8, 133.7, 132.2, 130.9, 128.3, 128.1, 128.0, 127.8, 127.6, 127.5, 126.9, 125.2, 51.6, 50.1, 36.9, 34.1, 27.6, 26.5, 24.6; **HRMS (ESI)**:  $m/z$   $[\text{M}+\text{H}]^+$  calcd for  $\text{C}_{26}\text{H}_{26}\text{ClN}_2\text{O}_4$ : 465.15756, 467.15461 found: 465.15716, 467.15450.

## 2.2 General procedure for synthesis of hydroxamic acids

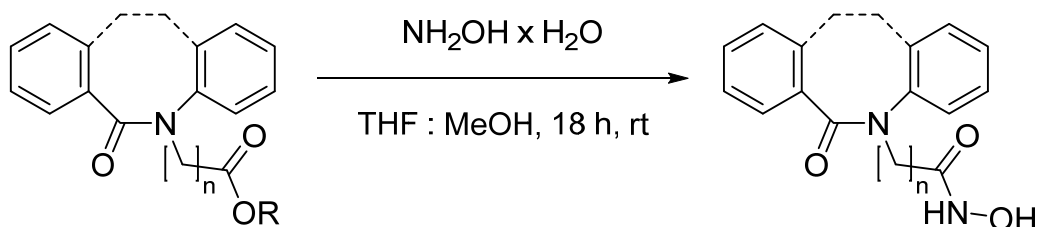

Ester from previous step was dissolved in mixture of THF (2 mL/mmol) and methanol (1 mL/mmol), then aqueous hydroxylamine solution (50% wt.; 2 ml/mmol) was added, reaction mixture was stirred for 18 hrs at room temperature. Volatiles were evaporated and resulting solid was dissolved in small amount of methanol, then small amount of chromatographic gel was added. Volatiles were evaporated, resulting solid was placed on top of chromatographic column and eluted with mixture of chloroform and methanol (1% to 10% of  $\text{CH}_3\text{OH}$  in  $\text{CHCl}_3$ ).

*N*-hydroxy-2-(11-methyl-6,12-dioxo-11,12-dihydrodibenzo[*b,f*][1,5]diazocin-5(6*H*)-yl)acetamide (**7a**): Yield: 38 %, white crystals, mp 233.0-234.0 °C,  $R_f$  = 0.35 (methanol:chloroform 1:9).  $^1\text{H}$  NMR (500 MHz,  $\text{CD}_3\text{OD}$ )  $\delta$  7.41 – 7.25 (m, 8H,  $\text{H}_{\text{Ar}}$ ), 4.57 (d,  $J$  = 15.7 Hz, 1H,  $\text{H}_{\text{CH}}$ ), 4.16 (d,  $J$  = 15.7 Hz, 1H,  $\text{H}_{\text{CH}}$ ), 3.44 (s, 3H,  $\text{H}_{\text{CH}_3}$ );  $^{13}\text{C}$  NMR (126 MHz,  $\text{CD}_3\text{OD}$ )  $\delta$  170.5, 170.3, 167.3, 141.5, 140.8, 135.7, 134.9, 132.4, 132.3, 129.8, 129.6, 128.7, 128.6, 127.1, 126.6, 51.1, 37.0; **HRMS (ESI)**:  $m/z$   $[\text{M}+\text{H}]^+$  calcd for  $\text{C}_{17}\text{H}_{16}\text{N}_3\text{O}_4$ : 326.11353, found: 326.11332.

*N*-hydroxy-3-(11-methyl-6,12-dioxo-11,12-dihydrodibenzo[*b,f*][1,5]diazocin-5(6*H*)-yl)propanamide (**7b**): Yield: 55 %, white crystals, mp 105.0-106.0 °C,  $R_f$  = 0.54 (methanol:chloroform 1:9).  $^1\text{H}$  NMR (500 MHz,  $\text{CD}_3\text{OD}$ )  $\delta$  7.42 – 7.34 (m, 2H,  $\text{H}_{\text{Ar}}$ ), 7.32 – 7.25 (m, 6H,  $\text{H}_{\text{Ar}}$ ), 4.70 (ddd,  $J$  = 13.6, 9.5, 6.0 Hz, 1H,  $\text{H}_{\text{CH}}$ ), 3.71 (ddd,  $J$  = 13.5, 9.4, 5.8 Hz, 1H,  $\text{H}_{\text{CH}}$ ), 3.43 (s, 3H,  $\text{H}_{\text{CH}_3}$ ), 2.45 (ddd,  $J$  = 14.2, 9.4, 6.0 Hz, 1H,  $\text{H}_{\text{CH}}$ ), 2.32 (ddd,  $J$  = 14.2, 9.5, 5.9 Hz, 1H,  $\text{H}_{\text{CH}}$ );  $^{13}\text{C}$  NMR (126 MHz,  $\text{CD}_3\text{OD}$ )  $\delta$  170.5, 169.9, 169.6, 141.4, 139.8, 136.3, 135.5, 132.4, 132.2, 129.9, 129.7, 128.4, 128.3, 127.3, 126.6, 46.8, 37.0, 32.1; **HRMS (ESI)**:  $m/z$   $[\text{M}+\text{H}]^+$  calcd for  $\text{C}_{18}\text{H}_{18}\text{N}_3\text{O}_4$ : 340.12918, found: 340.12909.

*N*-hydroxy-4-(11-methyl-6,12-dioxo-11,12-dihydrodibenzo[*b,f*][1,5]diazocin-5(6*H*)-yl)butanamide (**7c**): Yield: 52 %, white crystals, mp 190.0-191.0 °C,  $R_f$  = 0.42 (methanol:chloroform 1:9).  $^1\text{H}$  NMR (500 MHz,  $\text{CD}_3\text{OD}$ )  $\delta$  7.41 – 7.33 (m, 2H,  $\text{H}_{\text{Ar}}$ ), 7.31 – 7.25 (m, 6H,  $\text{H}_{\text{Ar}}$ ), 4.54 – 4.40 (m,

1H, H<sub>CH</sub>), 3.50 (ddd, *J* = 13.6, 8.2, 5.4 Hz, 1H, H<sub>CH</sub>), 3.45 (s, 3H, H<sub>CH3</sub>), 2.13 (t, *J* = 7.5 Hz, 2H, H<sub>CH2</sub>), 1.94 – 1.84 (m, 1H, H<sub>CH</sub>), 1.83 – 1.74 (m, 1H, H<sub>CH</sub>); <sup>13</sup>C NMR (126 MHz, CD<sub>3</sub>OD) δ 171.9, 170.5, 170.2, 141.4, 140.0, 136.4, 135.7, 132.4, 132.2, 129.8, 129.7, 128.4, 128.3, 127.2, 126.6, 49.6, 36.9, 31.1, 25.1; **HRMS (ESI):** *m/z* [M+H]<sup>+</sup> calcd for C<sub>19</sub>H<sub>20</sub>N<sub>3</sub>O<sub>4</sub>: 354.14483, found: 354.14478.

*N*-hydroxy-5-(11-methyl-6,12-dioxo-11,12-dihydrodibenzo[*b,f*][1,5]diazocin-5(6*H*)-yl)pentanamide (**7d**): Yield: 60 %, white crystals, mp 217.0-218.0 °C, *R*<sub>f</sub> = 0.42 (methanol:chloroform 1:9). <sup>1</sup>H NMR (500 MHz, CD<sub>3</sub>OD) δ 7.43 – 7.33 (m, 2H, H<sub>Ar</sub>), 7.32 – 7.22 (m, 6H, H<sub>Ar</sub>), 4.53 (dt, *J* = 13.5, 7.7 Hz, 1H, H<sub>CH</sub>), 3.46 – 3.39 (m, 4H, H<sub>CH</sub> + H<sub>CH3</sub>), 2.10 (hept, *J* = 7.2 Hz, 2H, H<sub>CH2</sub>), 1.64 (p, *J* = 7.5 Hz, 2H, H<sub>CH2</sub>), 1.57 – 1.47 (m, 2H, H<sub>CH2</sub>); <sup>13</sup>C NMR (126 MHz, DMSO) δ 168.9, 167.3, 166.8, 140.0, 138.5, 135.3, 134.6, 130.8, 130.6, 128.2, 128.1, 127.2, 127.0, 126.1, 125.5, 47.7, 36.0, 31.8, 26.9, 22.4; **HRMS (ESI):** *m/z* [M+H]<sup>+</sup> calcd for C<sub>20</sub>H<sub>22</sub>N<sub>3</sub>O<sub>4</sub>: 368.16048, found: 368.16052.

*N*-hydroxy-6-(11-methyl-6,12-dioxo-11,12-dihydrodibenzo[*b,f*][1,5]diazocin-5(6*H*)-yl)hexanamide (**7e**): Yield: 57 %, white crystals, mp 155.0-156.0 °C, *R*<sub>f</sub> = 0.43 (methanol:chloroform 1:9). <sup>1</sup>H NMR (500 MHz, CD<sub>3</sub>OD) δ 7.41 – 7.33 (m, 2H, H<sub>Ar</sub>), 7.31 – 7.24 (m, 6H, H<sub>Ar</sub>), 4.53 (dt, *J* = 13.5, 7.8 Hz, 1H, H<sub>CH</sub>), 3.44 (s, 3H, H<sub>CH3</sub>), 3.39 (ddd, *J* = 13.2, 7.2, 5.7 Hz, 1H, H<sub>CH</sub>), 2.08 (t, *J* = 7.4 Hz, 2H, H<sub>CH2</sub>), 1.71 – 1.58 (m, 2H, H<sub>CH2</sub>), 1.57 – 1.47 (m, 2H, H<sub>CH2</sub>), 1.43 – 1.28 (m, 2H, H<sub>CH2</sub>); <sup>13</sup>C NMR (126 MHz, CD<sub>3</sub>OD) δ 172.8, 170.4, 170.0, 141.4, 140.1, 136.4, 135.7, 132.4, 132.1, 129.7, 129.6, 128.4, 128.3, 127.2, 126.6, 50.0, 36.9, 33.6, 28.5, 27.4, 26.3; **HRMS (ESI):** *m/z* [M+H]<sup>+</sup> calcd for C<sub>21</sub>H<sub>24</sub>N<sub>3</sub>O<sub>4</sub>: 382.17613, found: 382.17611.

*N*-hydroxy-7-(11-methyl-6,12-dioxo-11,12-dihydrodibenzo[*b,f*][1,5]diazocin-5(6*H*)-yl)heptanamide (**7f**): Yield: 31 %, white crystals, mp 145.0-146.0 °C, *R*<sub>f</sub> = 0.45 (methanol:chloroform 1:9). <sup>1</sup>H NMR (500 MHz, CD<sub>3</sub>OD) δ 7.41 – 7.33 (m, 2H, H<sub>Ar</sub>), 7.31 – 7.24 (m, 6H, H<sub>Ar</sub>), 4.54 (dt, *J* = 13.5, 7.8 Hz, 1H, H<sub>CH</sub>), 3.43 (s, 3H, H<sub>CH3</sub>), 3.39 (dt, *J* = 13.2, 6.4 Hz, 1H, H<sub>CH</sub>), 2.08 (t, *J* = 7.4 Hz, 2H, H<sub>CH2</sub>), 1.66 – 1.56 (m, 2H, H<sub>CH2</sub>), 1.54 – 1.45 (m, 2H, H<sub>CH2</sub>), 1.40 – 1.29 (m, 4H, 2xH<sub>CH2</sub>); <sup>13</sup>C NMR (126 MHz, CD<sub>3</sub>OD) δ 172.9, 170.4, 170.0, 141.4, 140.1, 136.5, 135.8, 132.3, 132.1, 129.6, 129.6, 128.5, 128.3, 127.2, 126.6, 50.1, 36.9, 33.7, 29.7, 28.7, 27.6, 26.7; **HRMS (ESI):** *m/z* [M+H]<sup>+</sup> calcd for C<sub>22</sub>H<sub>26</sub>N<sub>3</sub>O<sub>4</sub>: 396.19178, found: 396.19180.

*N*-hydroxy-2-(6-oxodibenzo[*b,f*]azocin-5(6*H*)-yl)acetamide (**7g**): Yield: 69 %, white crystals, mp 119.0-120.0 °C, *R*<sub>f</sub> = 0.47 (methanol:chloroform 1:9). <sup>1</sup>H NMR (500 MHz, CD<sub>3</sub>OD) δ 7.33 – 6.90 (m, 10H, H<sub>Ar</sub> + H<sub>CH=CH</sub>), 4.45 (d, *J* = 15.5 Hz, 1H, H<sub>CH</sub>), 4.12 (d, *J* = 15.5 Hz, 1H, H<sub>CH</sub>); <sup>13</sup>C NMR (126 MHz, CD<sub>3</sub>OD) δ 173.8, 167.6, 142.7, 137.5, 136.6, 135.1, 133.6, 131.4, 130.3, 129.8, 129.7, 128.6, 128.6, 128.6, 128.1, 127.6, 52.1; **HRMS (ESI):** *m/z* [M+H]<sup>+</sup> calcd for C<sub>17</sub>H<sub>15</sub>N<sub>2</sub>O<sub>3</sub>: 295.10772, found: 295.10774.

*N*-hydroxy-3-(6-oxodibenzo[*b,f*]azocin-5(6*H*)-yl)propanamide (**7h**): Yield: 66 %, white crystals, mp 173.0-174.0 °C, *R*<sub>f</sub> = 0.47 (methanol:chloroform 1:9). <sup>1</sup>H NMR (500 MHz, CD<sub>3</sub>OD) δ 7.37 – 6.91

(m, 10H,  $H_{Ar}$  +  $H_{CH=CH}$ ), 4.57 (ddd,  $J$  = 13.8, 8.4, 5.8 Hz, 1H,  $H_{CH}$ ), 3.65 (ddd,  $J$  = 14.0, 8.2, 6.5 Hz, 1H,  $H_{CH}$ ), 2.39 (qdd,  $J$  = 14.6, 8.3, 6.3 Hz, 2H,  $H_{CH_2}$ );  $^{13}C$  NMR (126 MHz,  $CD_3OD$ )  $\delta$  173.4, 169.8, 142.2, 138.0, 137.2, 135.1, 133.8, 131.3, 130.1, 129.9, 129.7, 128.7, 128.6, 128.5, 127.8 (2x), 48.4, 32.1; **HRMS (ESI)**:  $m/z$   $[M+H]^+$  calcd for  $C_{18}H_{17}N_2O_3$ : 309.12337, found: 309.12329.

*N*-hydroxy-4-(6-oxodibenzo[*b,f*]azocin-5(6*H*)-yl)butanamide (**7i**): Yield: 71 %, white crystals, mp 172.0-173.0 °C,  $R_f$  = 0.48 (methanol:chloroform 1:9).  $^1H$  NMR (500 MHz,  $CD_3OD$ )  $\delta$  7.33 – 6.96 (m, 10H,  $H_{Ar}$  +  $H_{CH=CH}$ ), 4.40 (dt,  $J$  = 13.4, 7.8 Hz, 1H,  $H_{CH}$ ), 3.39 (dt,  $J$  = 13.5, 6.8 Hz, 1H,  $H_{CH}$ ), 2.14 (qt,  $J$  = 14.6, 7.6 Hz, 2H,  $H_{CH_2}$ ), 1.77 (p,  $J$  = 7.4 Hz, 2H,  $H_{CH_2}$ );  $^{13}C$  NMR (126 MHz,  $CD_3OD$ )  $\delta$  173.5, 172.0, 141.9, 138.2, 137.4, 135.0, 134.0, 131.3, 130.1, 129.9, 129.7, 128.7, 128.6, 128.5, 127.8, 127.7, 51.0, 31.3, 24.9; **HRMS (ESI)**:  $m/z$   $[M+H]^+$  calcd for  $C_{19}H_{19}N_2O_3$ : 323.13902, found: 323.13893.

*N*-hydroxy-5-(6-oxodibenzo[*b,f*]azocin-5(6*H*)-yl)pentanamide (**7j**): Yield: 59 %, white crystals, mp 175.0-176.0 °C,  $R_f$  = 0.48 (methanol:chloroform 1:9).  $^1H$  NMR (500 MHz,  $CD_3OD$ )  $\delta$  7.35 – 6.90 (m, 10H,  $H_{Ar}$  +  $H_{CH=CH}$ ), 4.43 (dt,  $J$  = 13.4, 7.6 Hz, 1H,  $H_{CH}$ ), 3.35 (ddd,  $J$  = 13.5, 7.5, 5.9 Hz, 1H,  $H_{CH}$ ), 2.08 (td,  $J$  = 7.2, 2.9 Hz, 2H,  $H_{CH_2}$ ), 1.75 – 1.55 (m, 2H,  $H_{CH_2}$ ), 1.53 – 1.43 (m, 2H,  $H_{CH_2}$ );  $^{13}C$  NMR (126 MHz,  $CD_3OD$ )  $\delta$  173.4, 172.5, 142.1, 138.3, 137.4, 135.0, 133.9, 131.4, 130.0, 129.9, 129.7, 128.7, 128.6, 128.4, 127.8, 127.7, 51.2, 33.4, 28.3, 24.3; **HRMS (ESI)**:  $m/z$   $[M+H]^+$  calcd for  $C_{20}H_{21}N_2O_3$ : 337.15467, found: 337.15448.

*N*-hydroxy-6-(6-oxodibenzo[*b,f*]azocin-5(6*H*)-yl)hexanamide (**7k**): Yield: 63 %, white crystals, mp 180.0-181.0 °C,  $R_f$  = 0.47 (methanol:chloroform 1:9).  $^1H$  NMR (500 MHz,  $CD_3OD$ )  $\delta$  7.32 – 6.95 (m, 10H,  $H_{Ar}$  +  $H_{CH=CH}$ ), 4.43 (dt,  $J$  = 13.4, 7.6 Hz, 1H,  $H_{CH}$ ), 3.40 – 3.32 (m, 1H,  $H_{CH}$ ), 2.06 (td,  $J$  = 7.3, 1.3 Hz, 2H,  $H_{CH_2}$ ), 1.66 – 1.52 (m, 2H,  $H_{CH_2}$ ), 1.52 – 1.42 (m, 2H,  $H_{CH_2}$ ), 1.42 – 1.26 (m, 2H,  $H_{CH_2}$ );  $^{13}C$  NMR (126 MHz,  $CD_3OD$ )  $\delta$  173.4, 172.8, 142.1, 138.4, 137.4, 135.0, 134.0, 131.4, 130.0, 129.8, 129.7, 128.7, 128.6, 128.4, 127.8, 127.8, 51.5, 33.6, 28.5, 27.6, 26.5; **HRMS (ESI)**:  $m/z$   $[M+H]^+$  calcd for  $C_{21}H_{23}N_2O_3$ : 351.17032, found: 351.17046.

*N*-hydroxy-7-(6-oxodibenzo[*b,f*]azocin-5(6*H*)-yl)heptanamide (**7l**): Yield: 54 %, white crystals, mp 151.0-152.0 °C,  $R_f$  = 0.47 (methanol: chloroform 1 : 9).  $^1H$  NMR (500 MHz,  $CD_3OD$ )  $\delta$  7.32 – 6.92 (m, 10H,  $H_{Ar}$  +  $H_{CH=CH}$ ), 4.42 (dt,  $J$  = 13.3, 7.6 Hz, 1H,  $H_{CH}$ ), 3.34 – 3.31 (m, 1H,  $H_{CH}$ ), 2.06 (t,  $J$  = 7.4 Hz, 2H,  $H_{CH_2}$ ), 1.57 (p,  $J$  = 7.4 Hz, 2H,  $H_{CH_2}$ ), 1.50 – 1.41 (m, 2H,  $H_{CH_2}$ ), 1.40 – 1.25 (m, 4H, 2x $H_{CH_2}$ );  $^{13}C$  NMR (126 MHz,  $CD_3OD$ )  $\delta$  173.3, 172.9, 142.2, 138.4, 137.4, 135.0, 133.9, 131.3, 130.0, 129.8, 129.6, 128.7, 128.6, 128.4, 127.8, 127.8, 51.5, 33.6, 29.8, 28.6, 27.7, 26.6; **HRMS (ESI)**:  $m/z$   $[M+H]^+$  calcd for  $C_{22}H_{25}N_2O_3$ : 365.18597, found: 365.18616.

*N*-hydroxy-6-(12-methyl-6,11-dioxo-11,12-dihydrodibenzo[*b,f*][1,4]diazocin-5(6*H*)-yl)hexanamide (**7m**): Yield: 58 %, white crystals, mp 95.0-96.0 °C,  $R_f$  = 0.47 (methanol:chloroform 1:9).  $^1H$  NMR (500 MHz,  $CD_3OD$ )  $\delta$  7.42 – 7.33 (m, 4H,  $H_{Ar}$ ), 7.33 – 7.22 (m, 4H,  $H_{Ar}$ ), 4.49 (ddd,  $J$  =

13.4, 8.6, 7.2 Hz, 1H, H<sub>CH</sub>), 3.53 – 3.39 (m, 4H, H<sub>CH</sub> + H<sub>CH3</sub>), 2.10 (t, *J* = 7.4 Hz, 2H, H<sub>CH2</sub>), 1.73 – 1.60 (m, 2H, H<sub>CH2</sub>), 1.60 – 1.47 (m, 2H, H<sub>CH2</sub>), 1.45 – 1.32 (m, 2H, H<sub>CH2</sub>); <sup>13</sup>C NMR (126 MHz, CD<sub>3</sub>OD) δ 172.7, 171.7, 171.3, 142.8, 140.4, 134.3, 133.9, 131.5, 131.4, 130.4, 130.4, 128.7, 127.8, 127.5, 127.2, 50.11, 37.3, 33.6, 29.0, 27.4, 26.4; **HRMS (ESI):** *m/z* [M+H]<sup>+</sup> calcd for C<sub>21</sub>H<sub>24</sub>N<sub>3</sub>O<sub>4</sub>: 382.17613, found: 382.17558.

*N*-hydroxy-6-(8,9-dichloro-12-methyl-6,11-dioxo-11,12-dihydrodibenzo[*b,f*][1,4]diazocin-5(6*H*)-yl)hexanamide (**7n**): Yield: 64 %, white crystals, mp 104-105.0 °C, *R*<sub>f</sub> = 0.48 (methanol:chloroform 1:9). <sup>1</sup>H NMR (500 MHz, CD<sub>3</sub>OD) δ 7.46 (d, *J* = 4.0 Hz, 2H, H<sub>Ar</sub>), 7.45 – 7.33 (m, 4H, H<sub>Ar</sub>), 4.46 (ddd, *J* = 13.5, 8.6, 7.3 Hz, 1H, H<sub>CH</sub>), 3.52 – 3.39 (m, 4H, H<sub>CH</sub> + H<sub>CH3</sub>), 2.09 (t, *J* = 7.4 Hz, 2H, H<sub>CH2</sub>), 1.74 – 1.60 (m, 2H, H<sub>CH2</sub>), 1.59 – 1.46 (m, 2H, H<sub>CH2</sub>), 1.46 – 1.31 (m, 2H, H<sub>CH2</sub>); <sup>13</sup>C NMR (126 MHz, CD<sub>3</sub>OD) δ 172.7, 169.2, 168.8, 142.4, 140.0, 135.6, 135.5, 134.4, 134.0, 130.8, 130.8, 129.7, 129.5, 128.9, 128.1, 50.3, 37.4, 33.6, 29.0, 27.4, 26.3; **HRMS (ESI):** *m/z* [M+H]<sup>+</sup> calcd for C<sub>21</sub>H<sub>22</sub>Cl<sub>2</sub>N<sub>3</sub>O<sub>4</sub>: 450.09819, 452.09524, found: 450.09780, 452.09489.

*N*-hydroxy-6-(12-benzyl-6,11-dioxo-11,12-dihydrodibenzo[*b,f*][1,4]diazocin-5(6*H*)-yl)hexanamide (**7o**): Yield: 52 %, white crystals, mp 172.0-173.0 °C, *R*<sub>f</sub> = 0.49 (methanol:chloroform 1:9). <sup>1</sup>H NMR (500 MHz, CD<sub>3</sub>OD) δ 7.41 – 7.18 (m, 13H, H<sub>Ar</sub>), 5.49 (d, *J* = 14.3 Hz, 1H, H<sub>Bn</sub>), 4.77 (d, *J* = 14.3 Hz, 1H, H<sub>Bn</sub>), 3.37 (ddd, *J* = 13.6, 10.6, 5.3 Hz, 1H, H<sub>CH</sub>), 2.55 (ddd, *J* = 13.5, 10.5, 5.5 Hz, 1H, H<sub>CH</sub>), 2.08 (t, *J* = 7.4 Hz, 2H, H<sub>CH2</sub>), 1.67 – 1.50 (m, 3H, H<sub>CH2</sub> + H<sub>CH</sub>), 1.49 – 1.36 (m, 1H, H<sub>CH</sub>), 1.31 – 1.12 (m, 2H, H<sub>CH2</sub>); <sup>13</sup>C NMR (126 MHz, CD<sub>3</sub>OD) δ 172.7, 171.4, 171.2, 141.8, 140.7, 138.4, 134.4, 133.9, 131.5, 131.4, 130.4, 130.3, 130.3 (2xC), 130.0 (2xC), 129.3, 128.9, 128.6, 127.2, 127.2, 53.6, 50.3, 33.6, 28.8, 27.5, 26.2; **HRMS (ESI):** *m/z* [M+H]<sup>+</sup> calcd for C<sub>27</sub>H<sub>28</sub>N<sub>3</sub>O<sub>4</sub>: 458.20743, found: 458.20681.

*N*-hydroxy-6-(6-oxo-11,12-dihydrodibenzo[*b,f*]azocin-5(6*H*)-yl)hexanamide (**7p**): Yield: 49 %, white crystals, mp 164.0-165.0 °C, *R*<sub>f</sub> = 0.47 (methanol:chloroform 1:9). <sup>1</sup>H NMR (500 MHz, CD<sub>3</sub>OD) δ 7.09 (qd, *J* = 7.7, 6.0 Hz, 7H, H<sub>Ar</sub>), 6.97 (d, *J* = 7.5 Hz, 1H, H<sub>Ar</sub>), 4.15 (ddd, *J* = 13.3, 9.8, 5.9 Hz, 1H, H<sub>CH</sub>), 3.60 (ddd, *J* = 11.8, 9.7, 5.5 Hz, 1H, H<sub>CH</sub>), 3.41 – 3.31 (m, 2H, H<sub>CH2-CH2</sub>), 3.10 – 2.90 (m, 2H, H<sub>CH2-CH2</sub>), 2.10 (t, *J* = 7.4 Hz, 2H, H<sub>CH2</sub>), 1.83 – 1.71 (m, 1H, H<sub>CH</sub>), 1.71 – 1.53 (m, 3H, H<sub>CH2</sub> + H<sub>CH</sub>), 1.52 – 1.34 (m, 2H, H<sub>CH2</sub>); <sup>13</sup>C NMR (126 MHz, CD<sub>3</sub>OD) δ 174.6, 172.7, 143.2, 139.4, 138.8, 137.1, 131.6, 130.5, 130.3, 129.3, 128.7, 128.0, 127.4, 127.3, 50.5, 33.7, 33.6, 31.6, 28.6, 27.7, 26.5; **HRMS (ESI):** *m/z* [M+H]<sup>+</sup> calcd for C<sub>21</sub>H<sub>25</sub>N<sub>2</sub>O<sub>3</sub>: 353.18597, found: 353.18549.

*N*-hydroxy-6-(2-bromo-11-methyl-6,12-dioxo-11,12-dihydrodibenzo[*b,f*][1,5]diazocin-5(6*H*)-yl)hexanamide (**7r**): Yield: 56 %, white crystals, mp 76.0-77.0 °C, *R*<sub>f</sub> = 0.55 (methanol:chloroform 1:9). <sup>1</sup>H NMR (500 MHz, CD<sub>3</sub>OD) δ 7.52 (dd, *J* = 8.6, 2.3 Hz, 1H, H<sub>Ar</sub>), 7.46 (d, *J* = 2.3 Hz, 1H, H<sub>Ar</sub>), 7.44 – 7.37 (m, 1H, H<sub>Ar</sub>), 7.34 – 7.25 (m, 3H, H<sub>Ar</sub>), 7.22 (d, *J* = 8.6 Hz, 1H, H<sub>Ar</sub>), 4.52 (dt, *J* = 13.5, 7.8 Hz, 1H, H<sub>CH</sub>), 3.43 (s, 3H, H<sub>CH3</sub>), 3.37 (dt, *J* = 13.3, 6.4 Hz, 1H, H<sub>CH</sub>), 2.08 (t, *J* = 7.4 Hz, 2H, H<sub>CH2</sub>), 1.70 – 1.57 (m, 2H, H<sub>CH2</sub>), 1.56 – 1.46 (m, 2H, H<sub>CH2</sub>), 1.41

– 1.27 (m, 2H, H<sub>CH2</sub>); <sup>13</sup>C NMR (126 MHz, CD<sub>3</sub>OD) δ 172.8, 169.8, 168.6, 141.1, 139.3, 138.3, 135.5, 135.3, 132.3, 131.3, 129.9, 129.2, 128.4, 126.7, 122.8, 49.9, 37.0, 33.6, 28.5, 27.4, 26.3; **HRMS (ESI):** *m/z* [M+H]<sup>+</sup> calcd for C<sub>21</sub>H<sub>23</sub>BrN<sub>3</sub>O<sub>4</sub>: 460.08665, 462.08460, found: 460.08622, 462.08401.

*N*-hydroxy-6-(2,3-dimethoxy-11-methyl-6,12-dioxo-11,12-dihydrodibenzo[*b,f*][1,5]diazocin-5(6*H*)-yl)hexanamide (**7s**): Yield: 50 %, white crystals, mp 82.0-83.0 °C, R<sub>f</sub> = 0.49 (methanol:chloroform 1:9). <sup>1</sup>H NMR (500 MHz, CD<sub>3</sub>OD) δ 7.42 – 7.34 (m, 1H, H<sub>Ar</sub>), 7.34 – 7.22 (m, 3H, H<sub>Ar</sub>), 6.81 (d, *J* = 11.5 Hz, 2H, H<sub>Ar</sub>), 4.54 (dt, *J* = 13.5, 7.8 Hz, 1H, H<sub>CH</sub>), 3.76 (d, *J* = 5.1 Hz, 6H, HOCH<sub>3</sub>), 3.42 (s, 3H, H<sub>CH3</sub>), 3.38 – 3.32 (m, 1H, H<sub>CH</sub>), 2.09 (t, *J* = 7.4 Hz, 2H, H<sub>CH2</sub>), 1.74 – 1.56 (m, 2H, H<sub>CH2</sub>), 1.57 – 1.44 (m, 2H, H<sub>CH2</sub>), 1.44 – 1.27 (m, 2H, H<sub>CH2</sub>); <sup>13</sup>C NMR (126 MHz, CD<sub>3</sub>OD) δ 172.8, 170.5, 170.2, 152.4, 150.3, 141.7, 135.8, 133.2, 132.0, 129.5, 128.3, 128.2, 126.5, 110.4, 110.0, 56.6, 56.5, 49.8, 37.1, 33.6, 28.4, 27.4, 26.4; **HRMS (ESI):** *m/z* [M+H]<sup>+</sup> calcd for C<sub>23</sub>H<sub>28</sub>N<sub>3</sub>O<sub>6</sub>: 442.19726, found: 442.19664.

*N*-hydroxy-6-(5-methyl-6,14-dioxo-5,14-dihydrobenzonaphtho[2,3-*f*][1,5]diazocin-13(6*H*)-yl)hexanamide (**7t**): Yield: 50 %, white crystals, mp 161.0-162.0 °C, R<sub>f</sub> = 0.41 (methanol:chloroform 1:9). <sup>1</sup>H NMR (500 MHz, DMSO-*d*<sub>6</sub>) δ 7.91 (dd, *J* = 24.5, 8.4 Hz, 4H, H<sub>Ar</sub>), 7.56 (pd, *J* = 6.8, 1.5 Hz, 2H, H<sub>Ar</sub>), 7.44 – 7.30 (m, 3H, H<sub>Ar</sub>), 4.42 (dt, *J* = 13.3, 7.8 Hz, 1H, H<sub>CH</sub>), 3.53 – 3.40 (m, 4H, H<sub>CH</sub> + H<sub>CH3</sub>), 1.91 (t, *J* = 7.4 Hz, 2H, H<sub>CH2</sub>), 1.57 – 1.30 (m, 4H, 2xH<sub>CH2</sub>), 1.30 – 1.18 (m, 2H, H<sub>CH2</sub>); <sup>13</sup>C NMR (126 MHz, DMSO) δ 168.9, 167.2, 165.5, 138.5, 136.7, 136.0, 133.7, 133.2, 132.4, 131.5, 130.7, 128.0, 127.9, 127.9, 127.8, 127.4, 127.2, 126.7, 125.1, 48.9, 36.1, 32.2, 27.2, 26.0, 24.8; **HRMS (ESI):** *m/z* [M+H]<sup>+</sup> calcd for C<sub>25</sub>H<sub>25</sub>ClN<sub>3</sub>O<sub>4</sub>: 466.15281, 468.14986, found: 466.15250, 468.14997.

### 3. Spectra

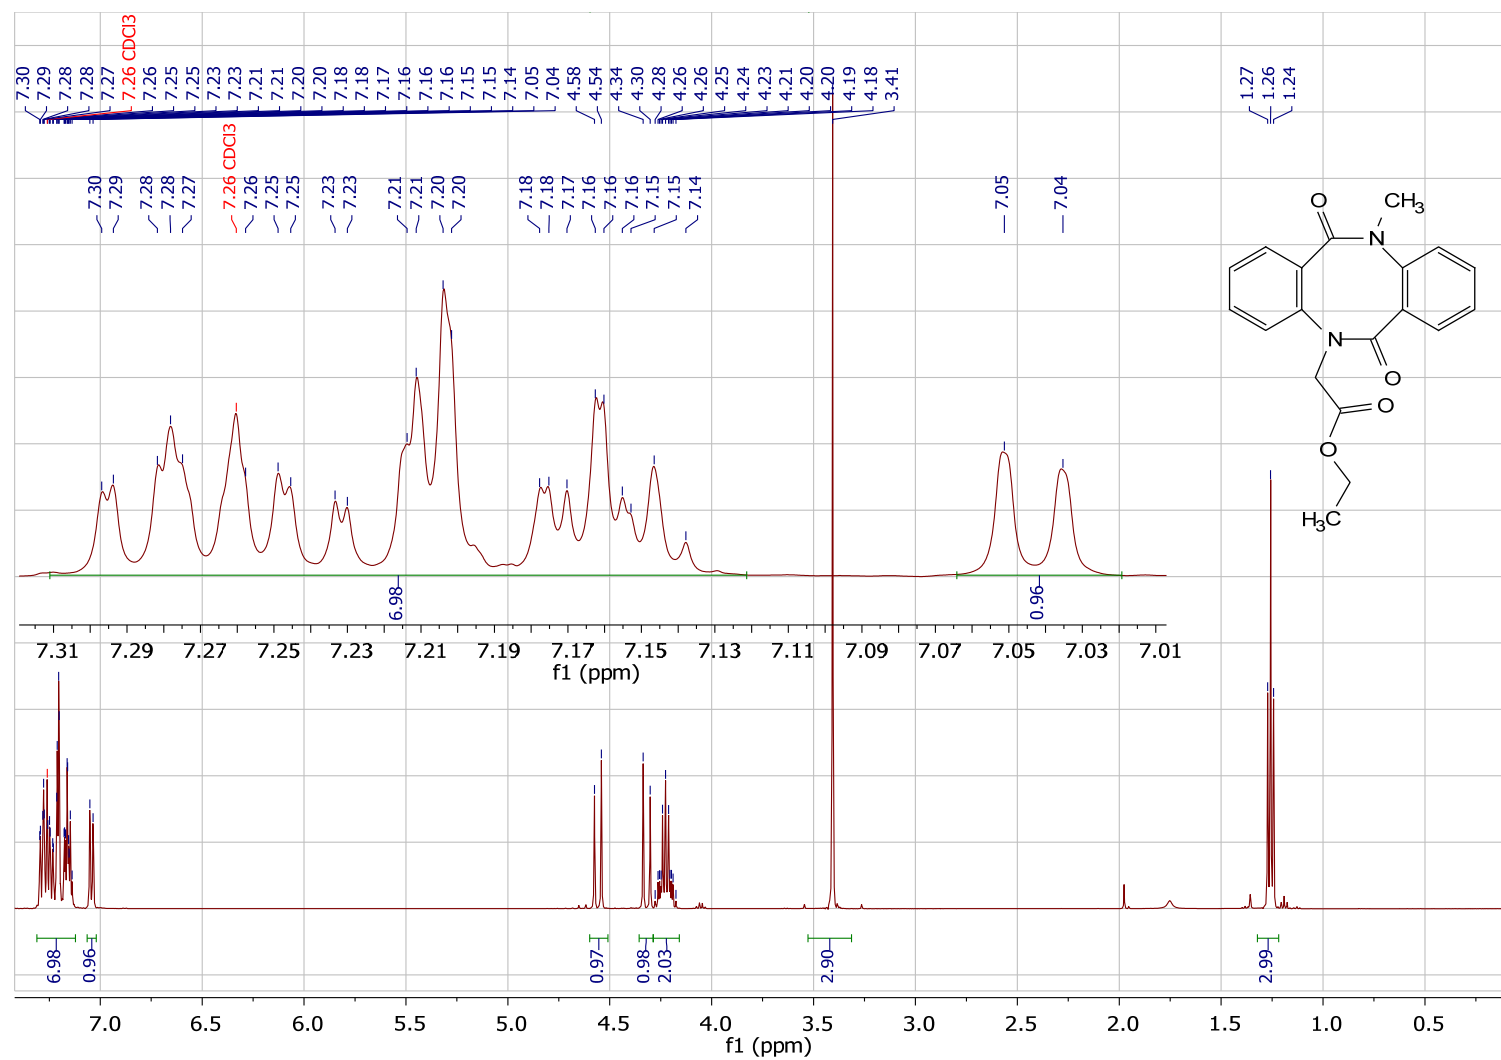

**Figure S1.**  $^1\text{H}$  NMR spectrum of ethyl 2-(11-methyl-6,12-dioxo-11,12-dihydrodibenzo[*b,f*][1,5]diazocin-5(6*H*)-yl)acetate (**10a**).

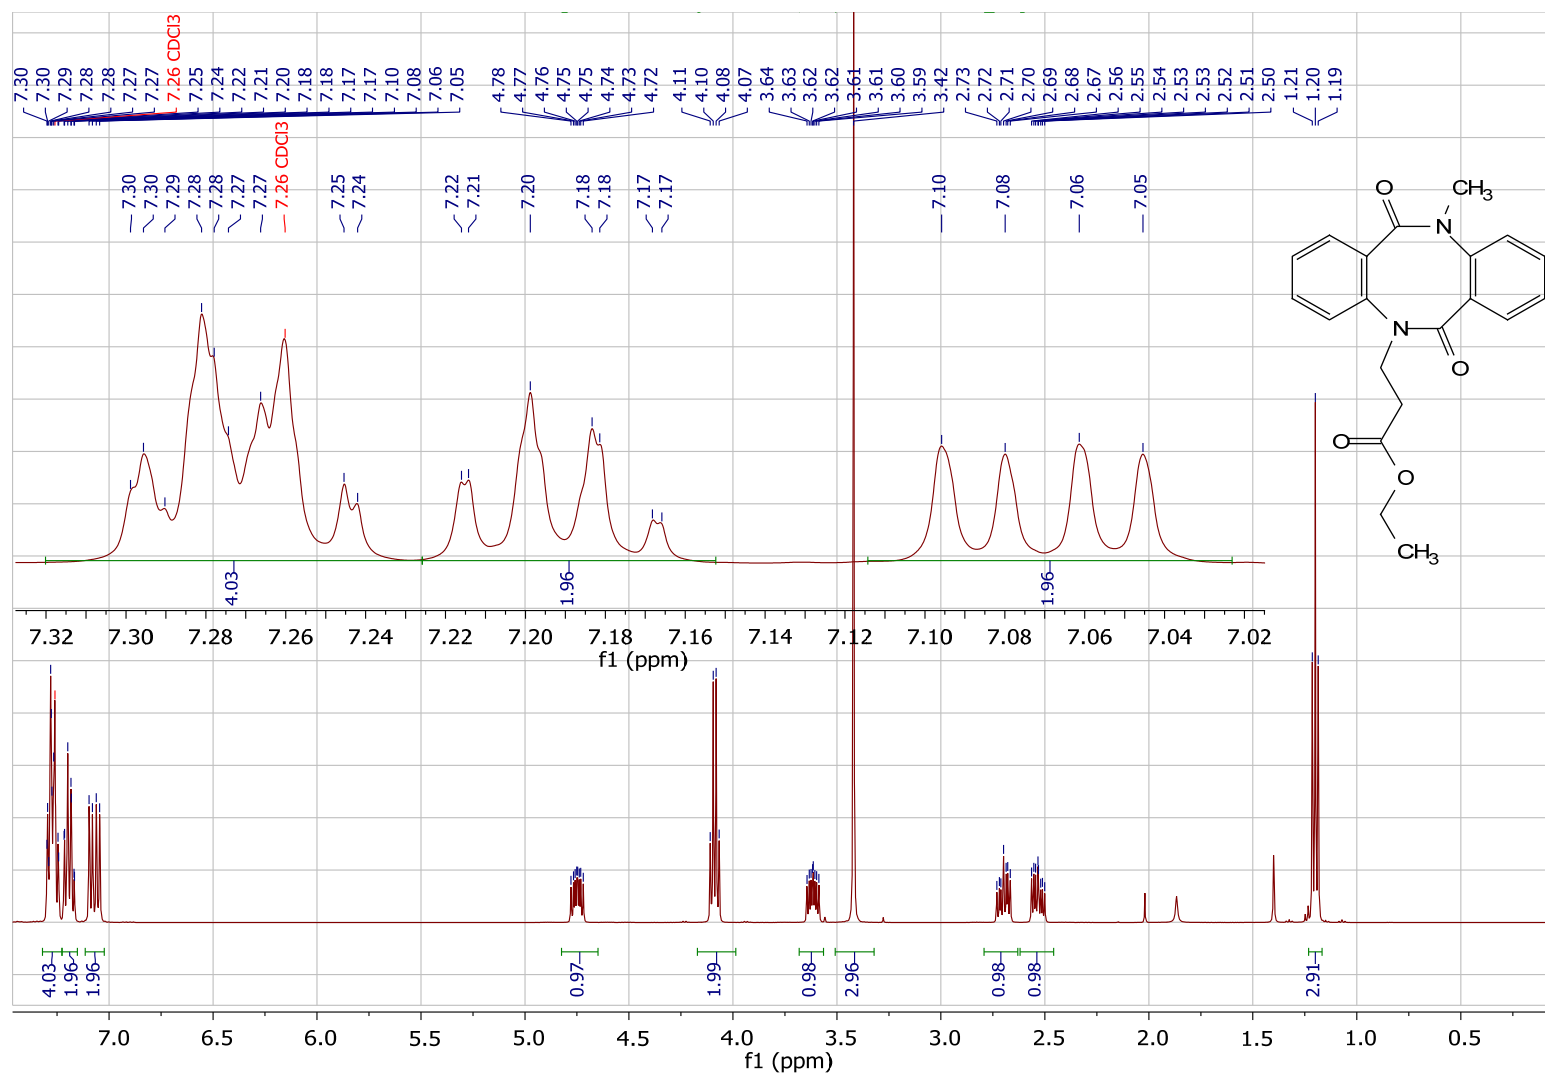

Figure S2. <sup>1</sup>H NMR spectrum of ethyl 3-(11-methyl-6,12-dioxo-11,12-dihydrodibenzo[b,f][1,5]diazocin-5(6H)-yl)propanoate (10b).

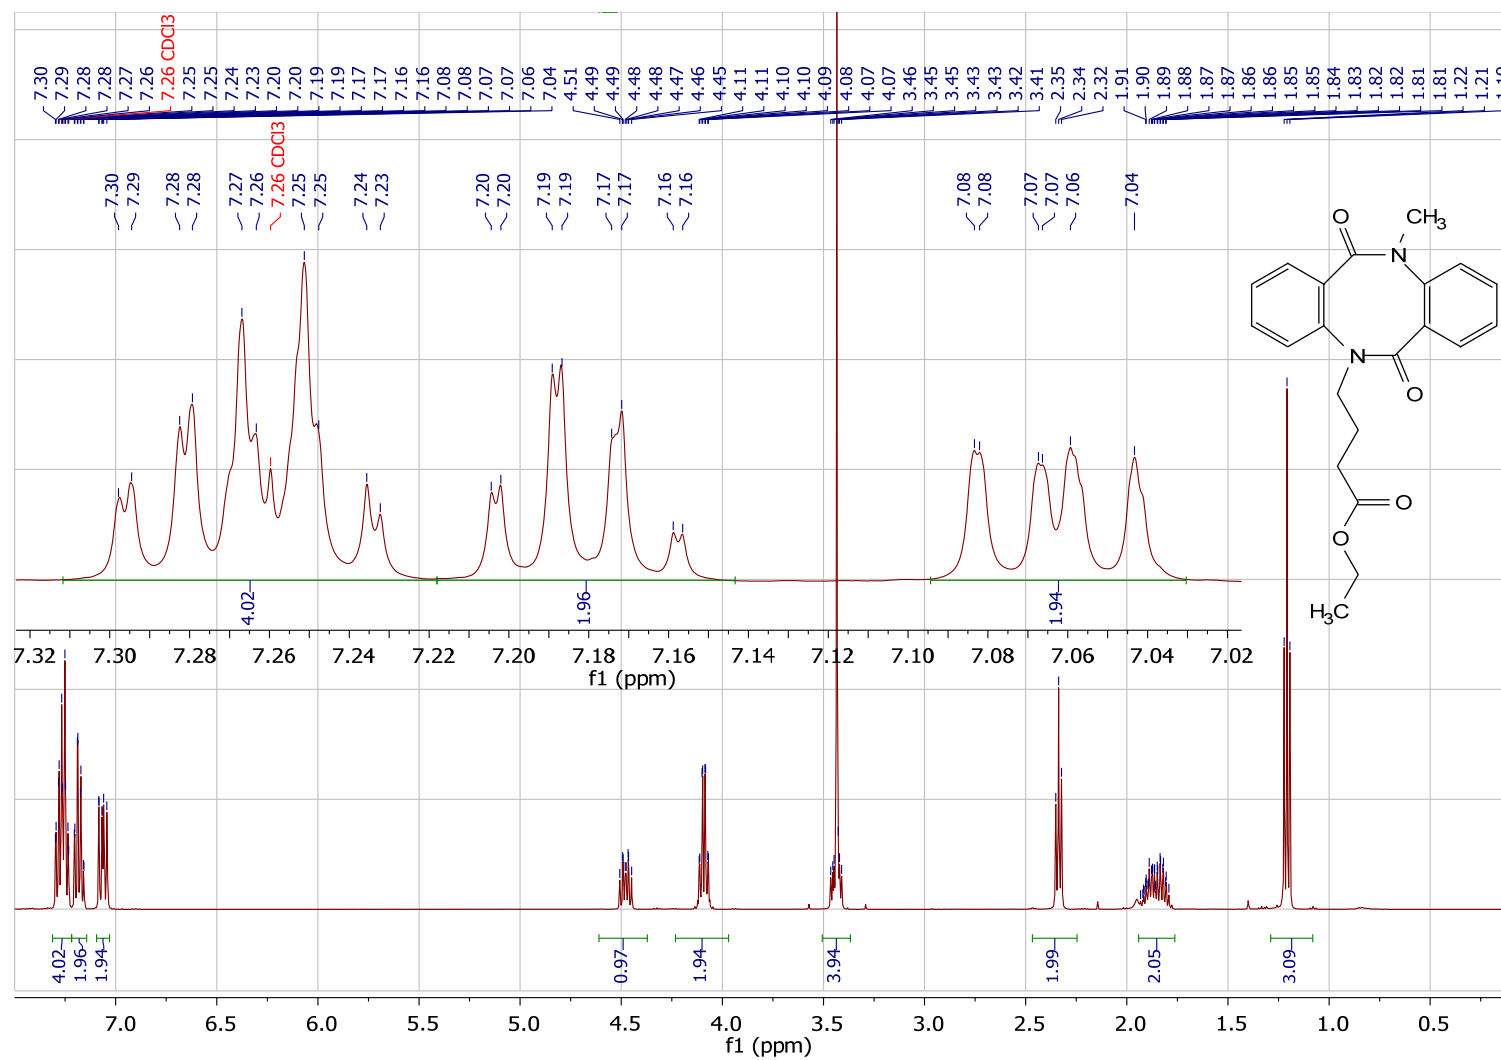

**Figure S3.**  $^1\text{H}$  NMR spectrum of ethyl 4-(11-methyl-6,12-dioxo-11,12-dihydrodibenzo[*b,f*][1,5]diazocin-5(6*H*)-yl)butanoate (**10c**).

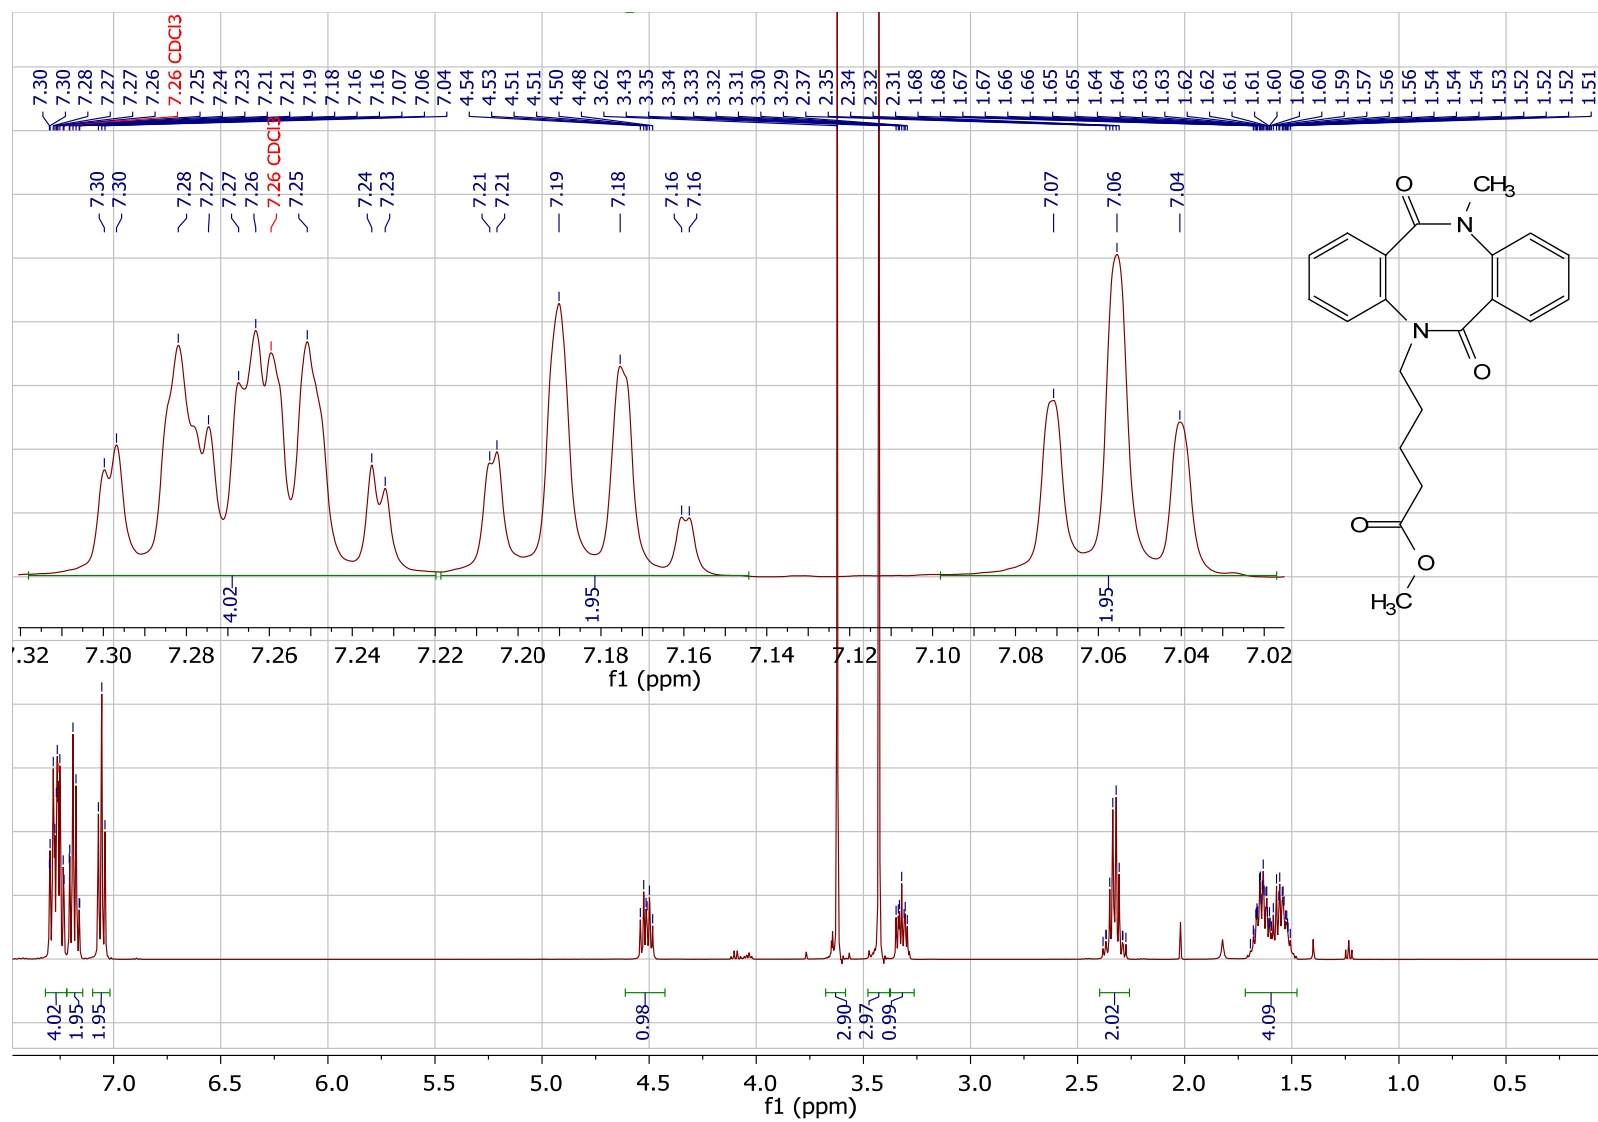

**Figure S4.**  $^1\text{H}$  NMR spectrum of methyl 5-(11-methyl-6,12-dioxo-11,12-dihydrodibenzo[*b,f*][1,5]diazocin-5(6*H*)-yl)pentanoate (**10d**).

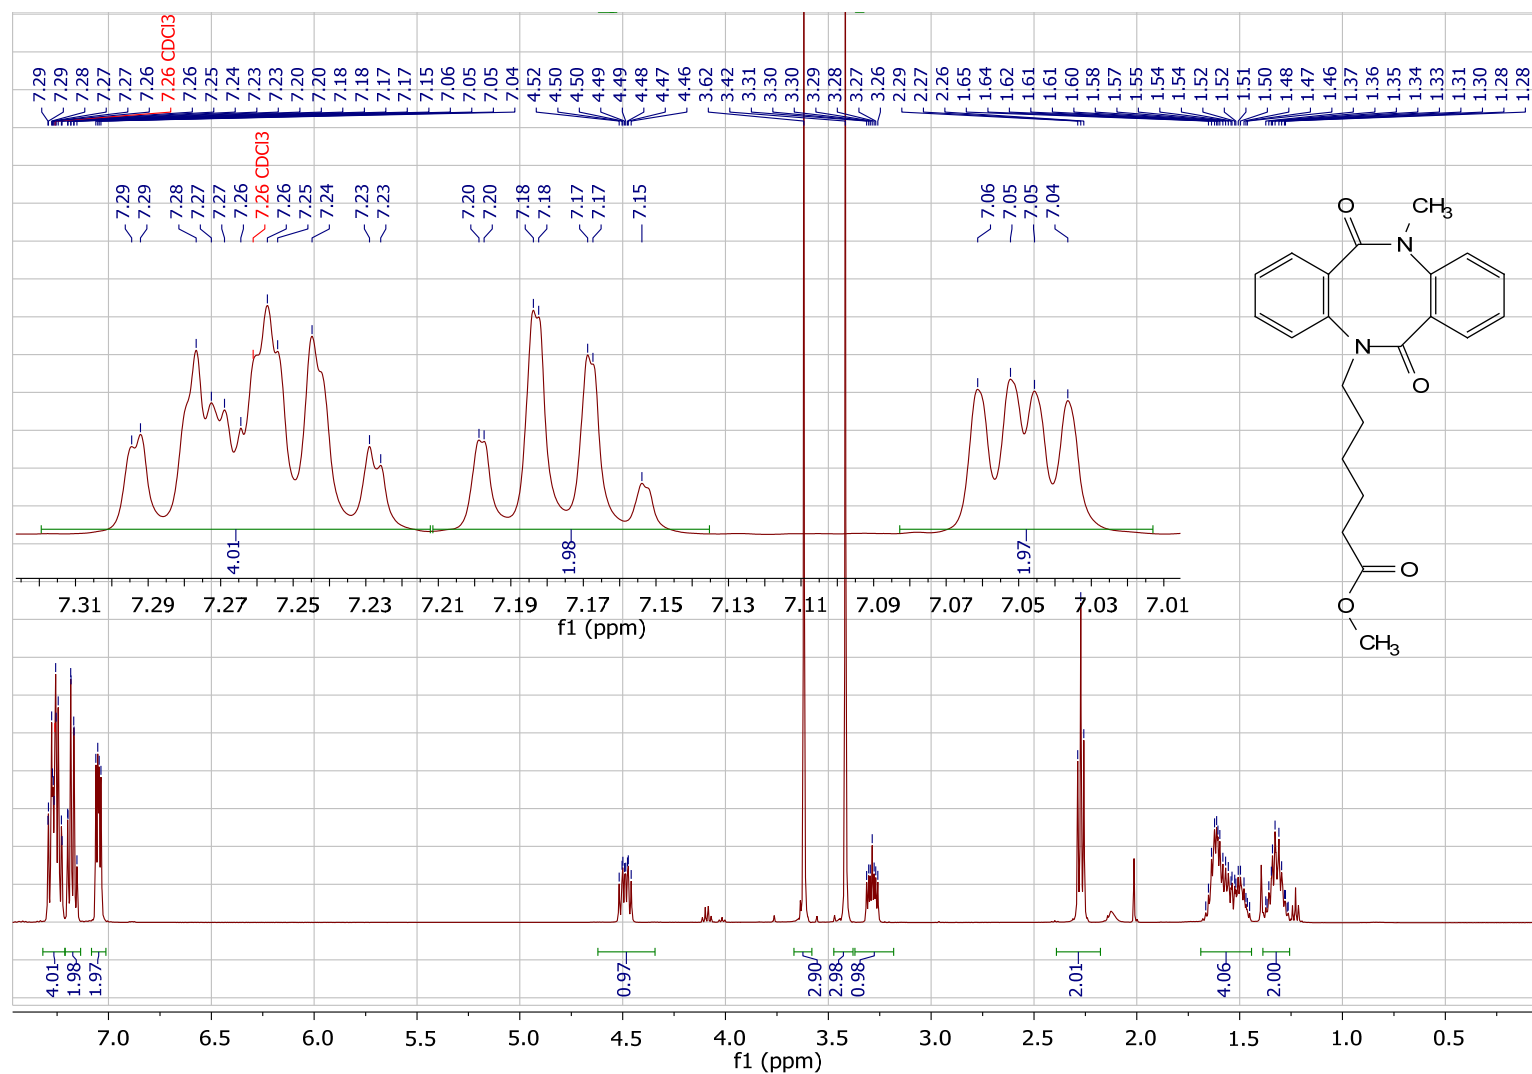

**Figure S5.**  $^1\text{H}$  NMR spectrum of methyl 6-(11-methyl-6,12-dioxo-11,12-dihydrodibenzo[*b,f*][1,5]diazocin-5(6*H*)-yl)hexanoate (**10e**).

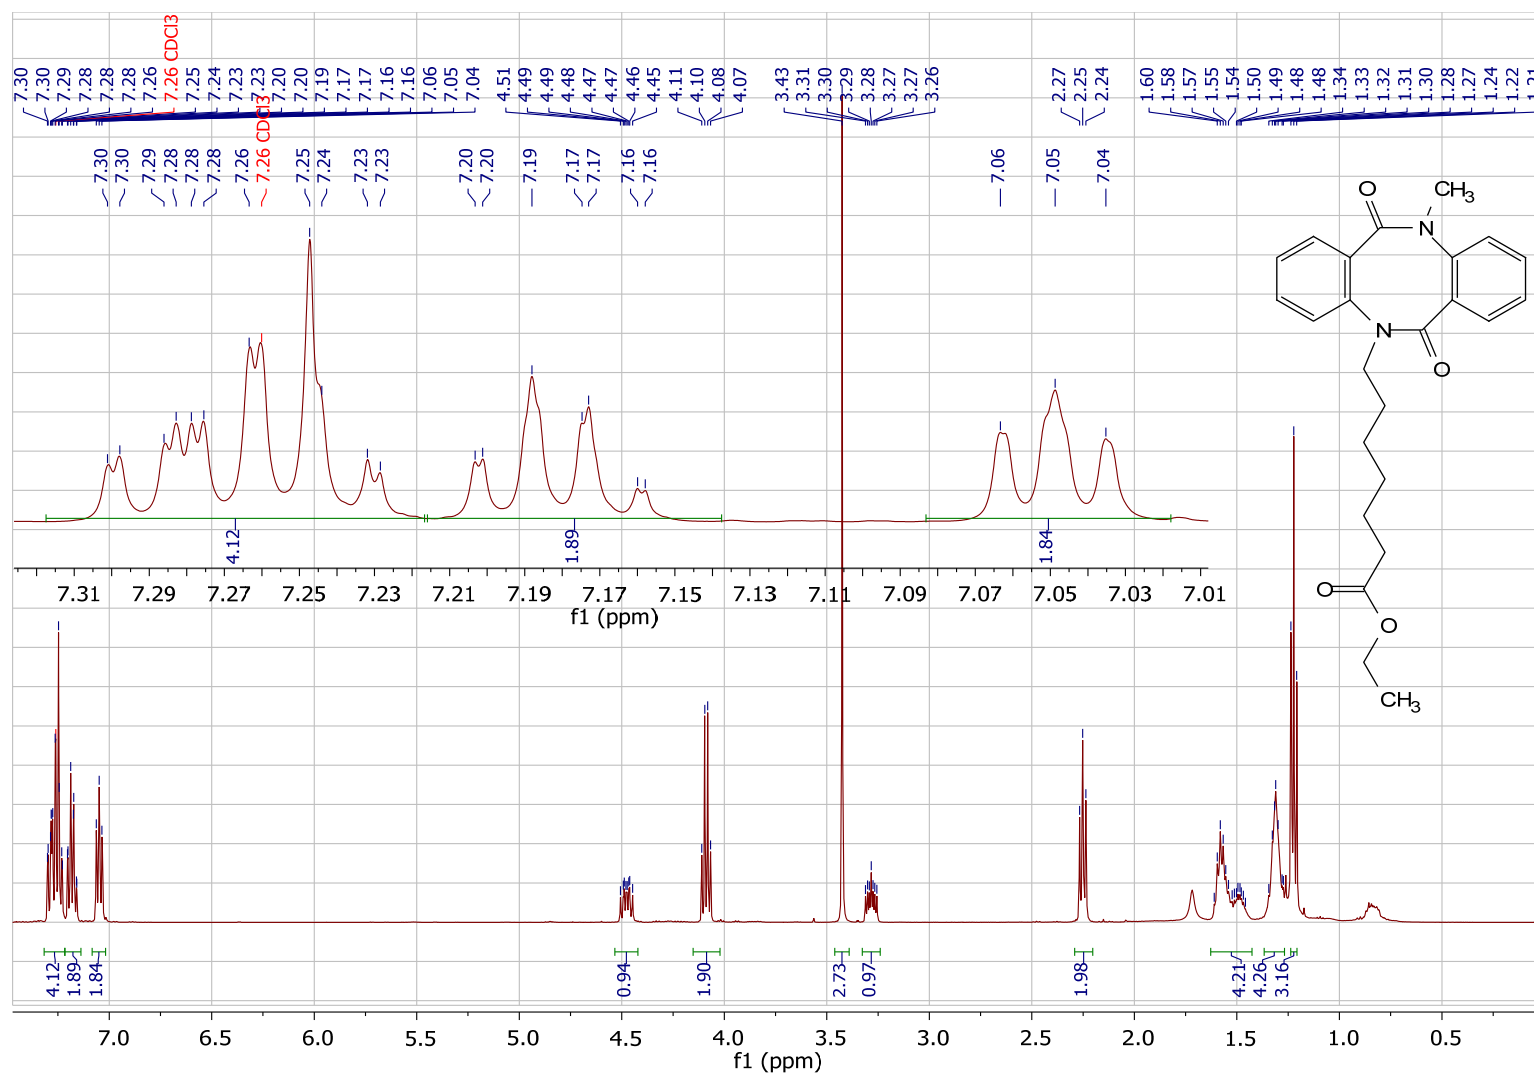

**Figure S6.**  $^1\text{H}$  NMR spectrum of ethyl 7-(11-methyl-6,12-dioxo-11,12-dihydrodibenzo[*b,f*][1,5]diazocin-5(6*H*)-yl)heptanoate (**10f**).

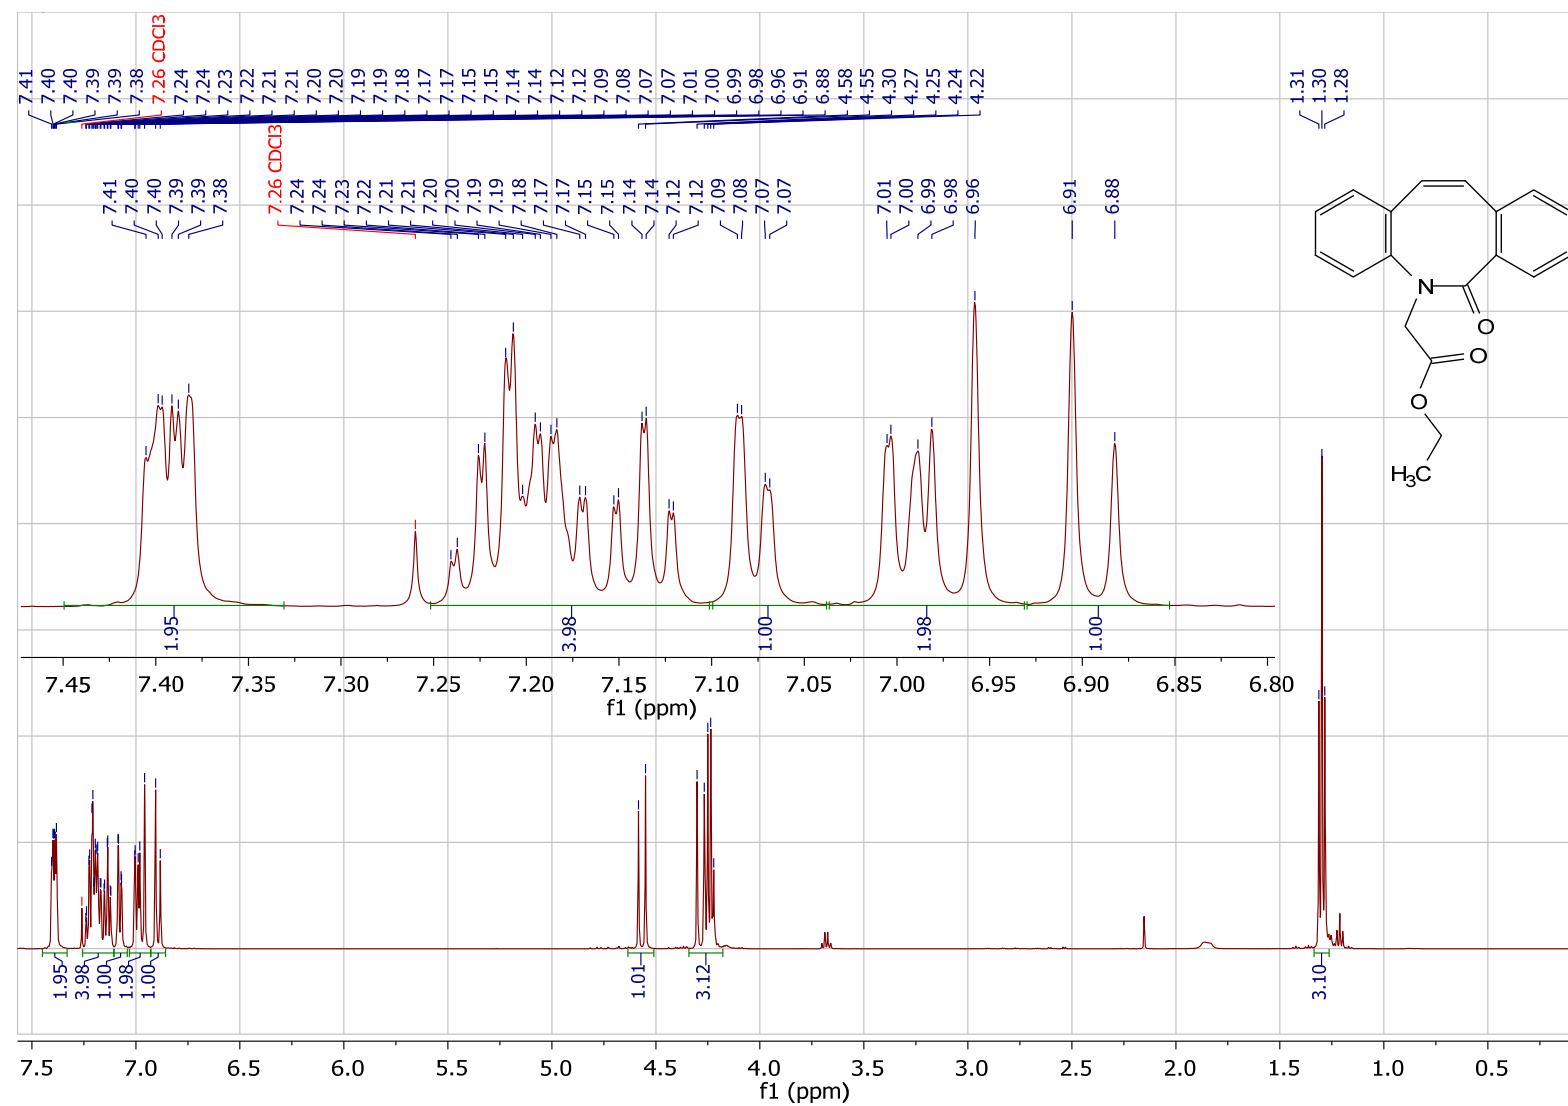

**Figure S7.** <sup>1</sup>H NMR spectrum of ethyl 2-(6-oxodibenzo[*b,f*]azocin-5(6*H*)-yl)acetate (**10g**).

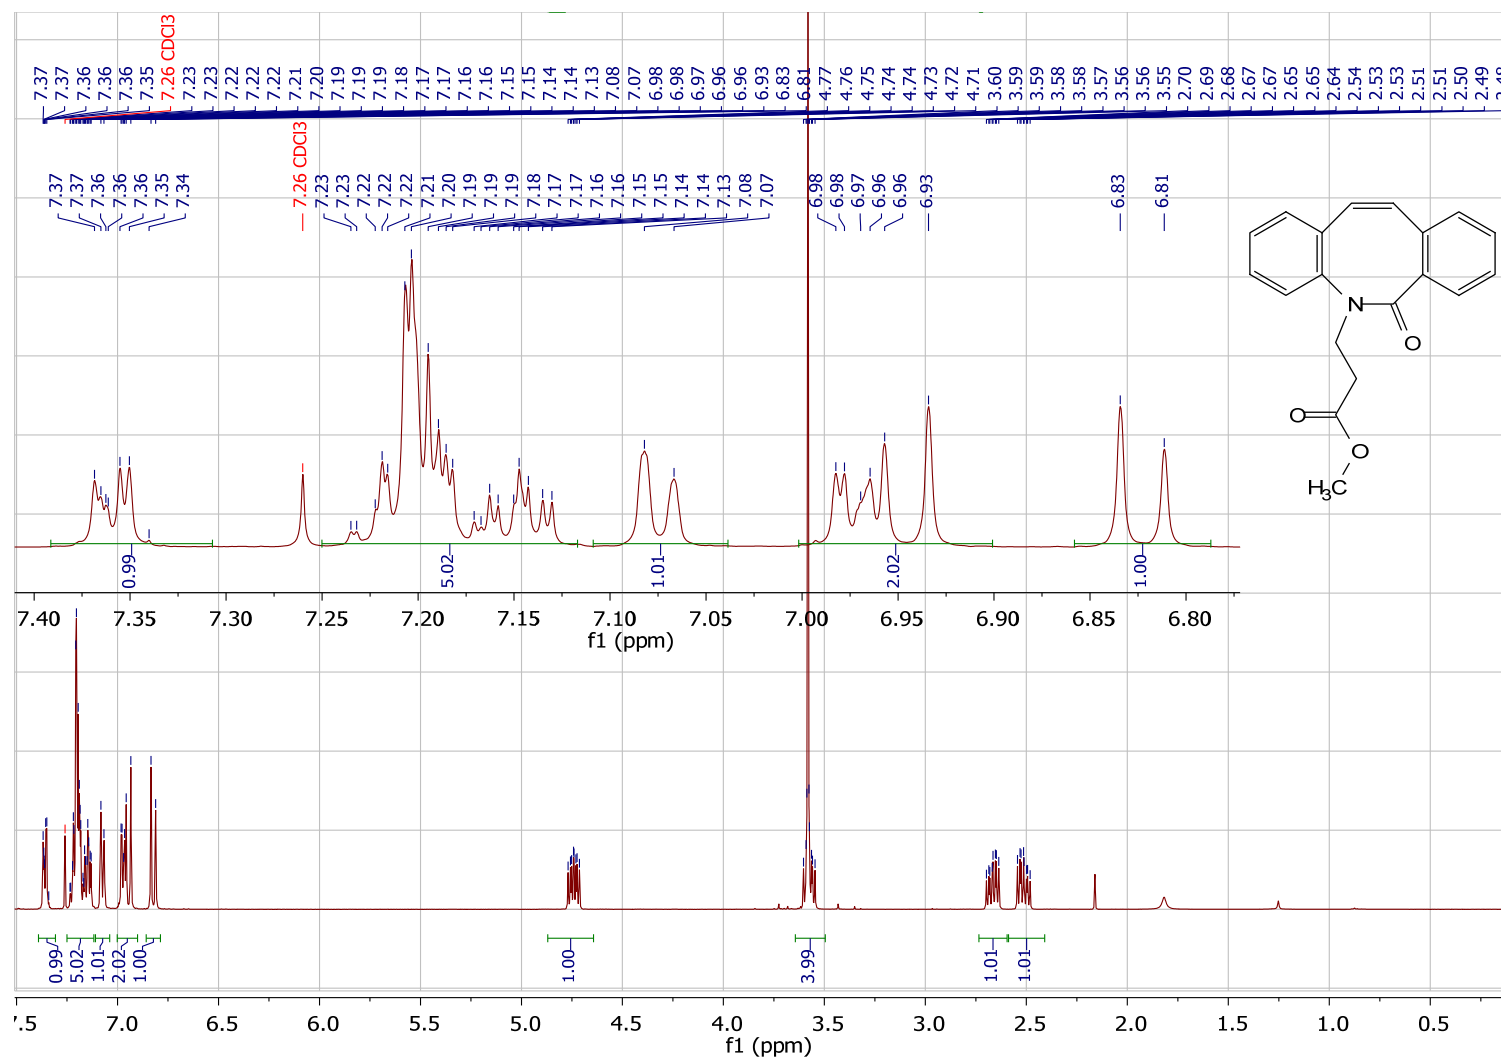

**Figure S8.**  $^1\text{H}$  NMR spectrum of methyl 3-(6-oxodibenzo[*b,f*]azocin-5(6*H*)-yl)propanoate (**10h**).

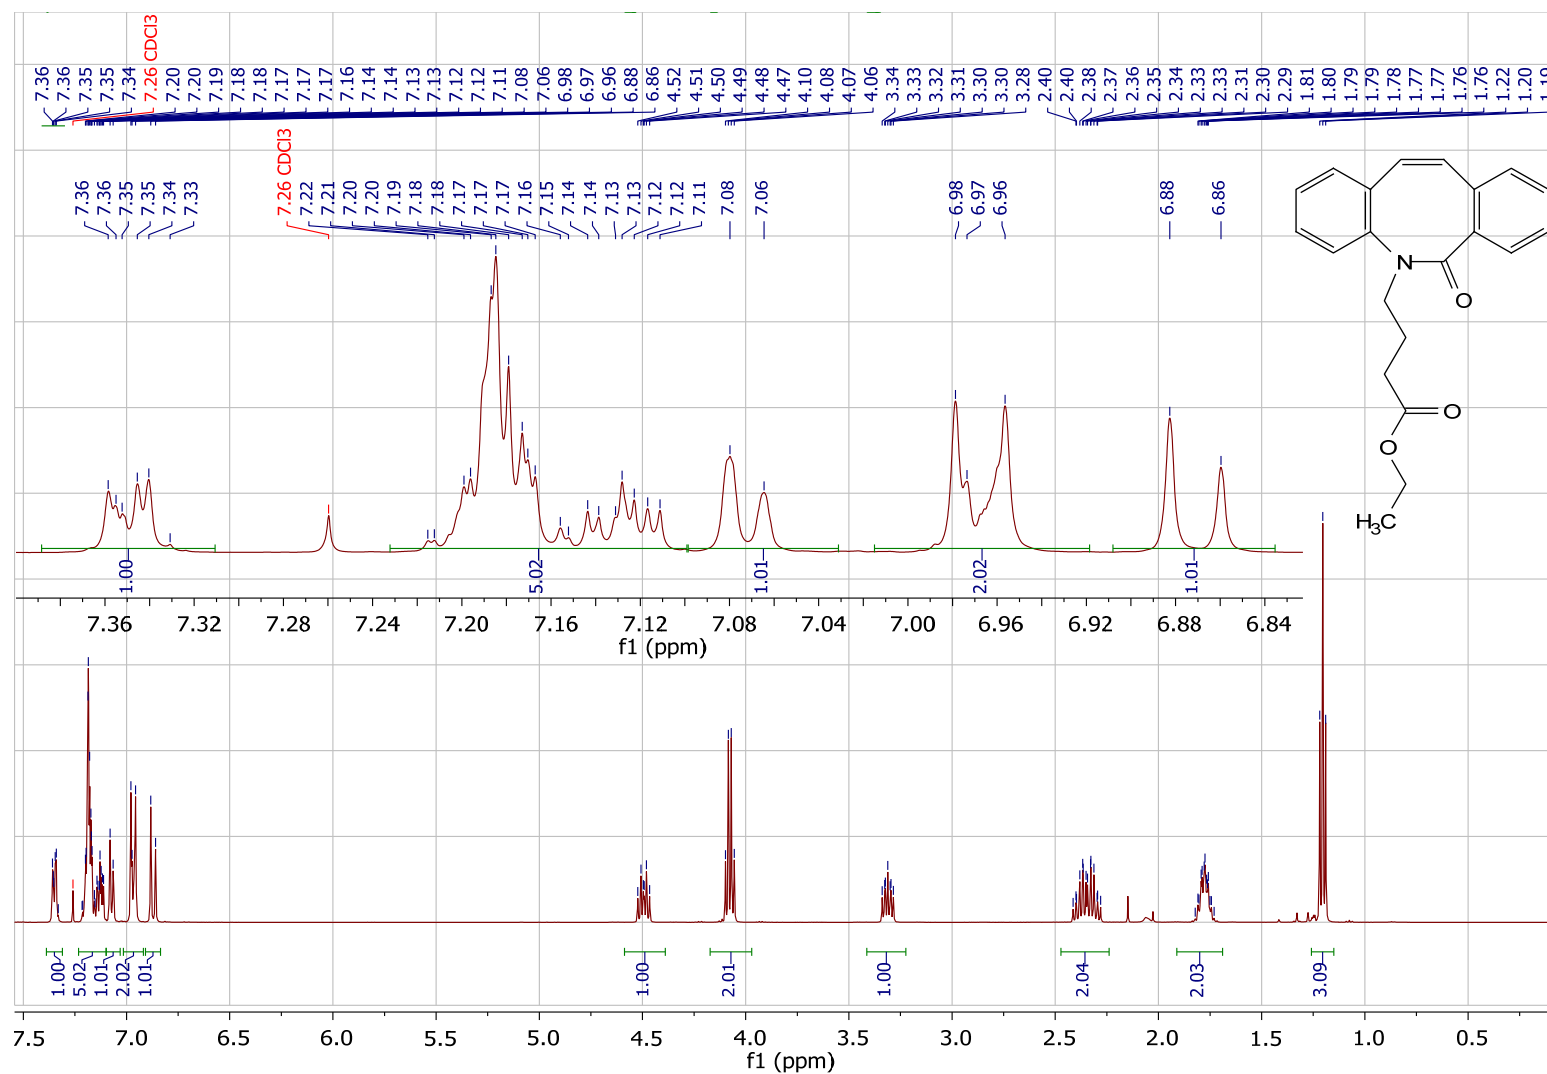

**Figure S9.**  $^1\text{H}$  NMR spectrum of ethyl 4-(6-oxodibenzo[*b,f*]azocin-5(6*H*)-yl)butanoate (**10i**).

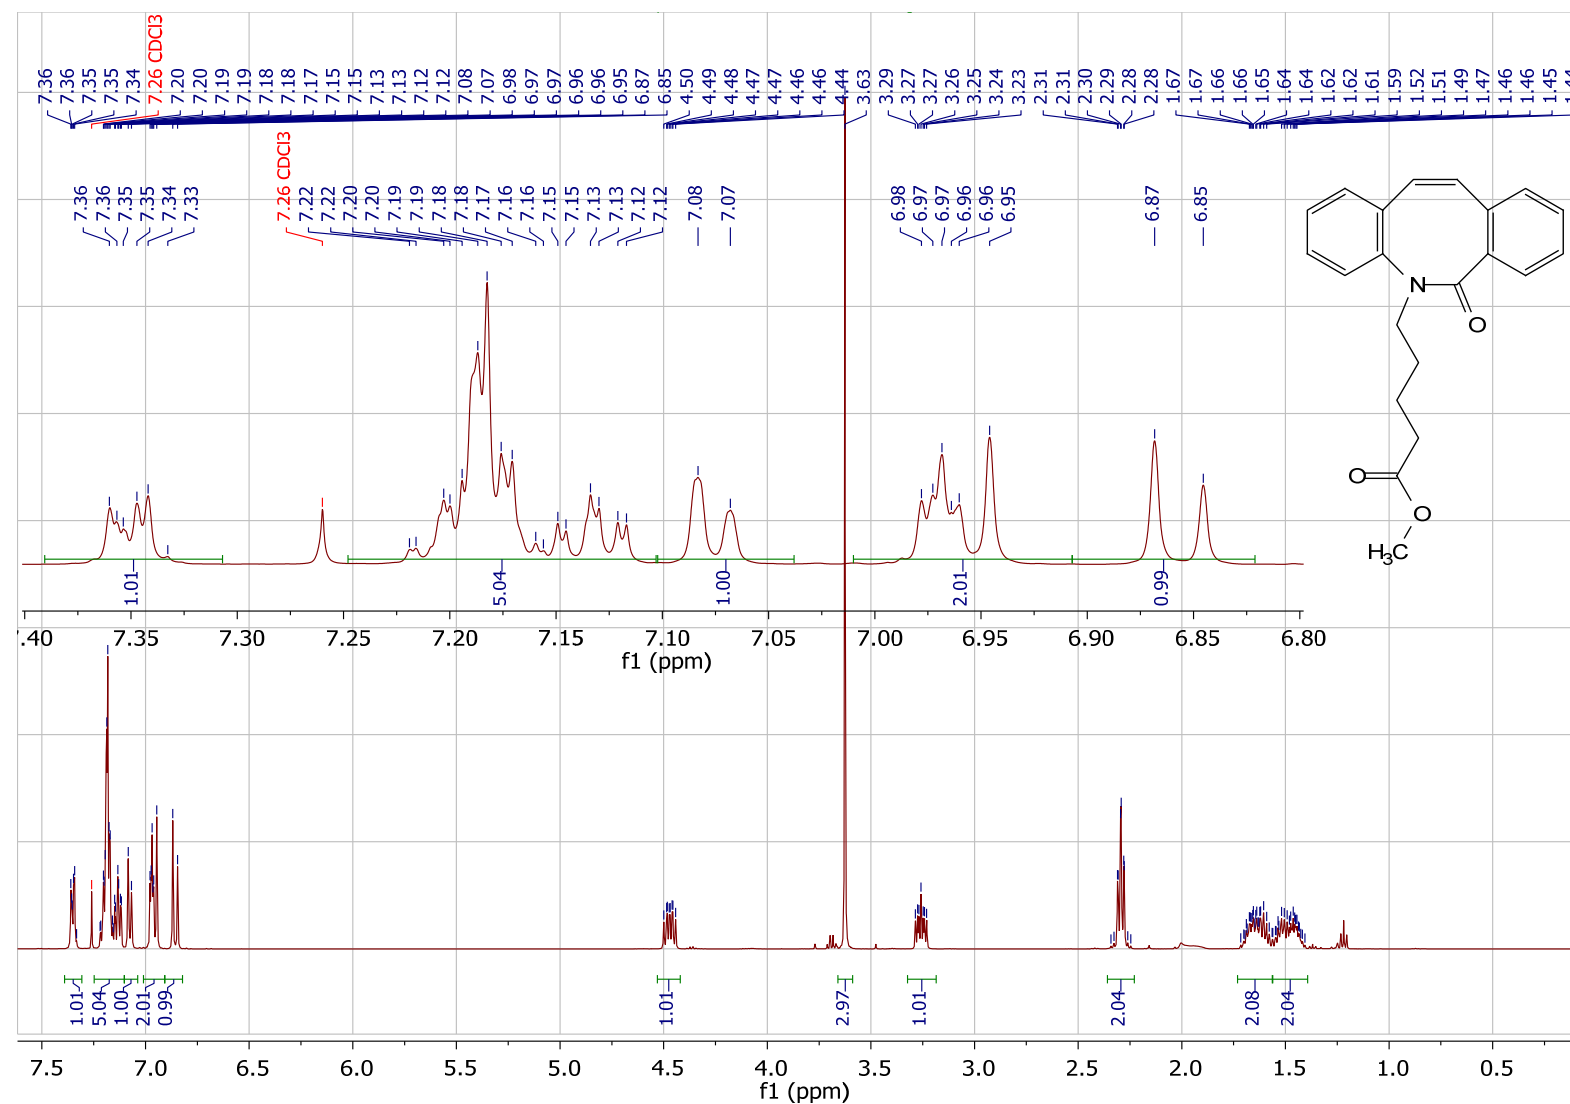

Figure S10.  $^1\text{H}$  NMR spectrum of methyl 5-(6-oxodibenzo[*b,f*]azocin-5(6*H*)-yl)pentanoate (10j).

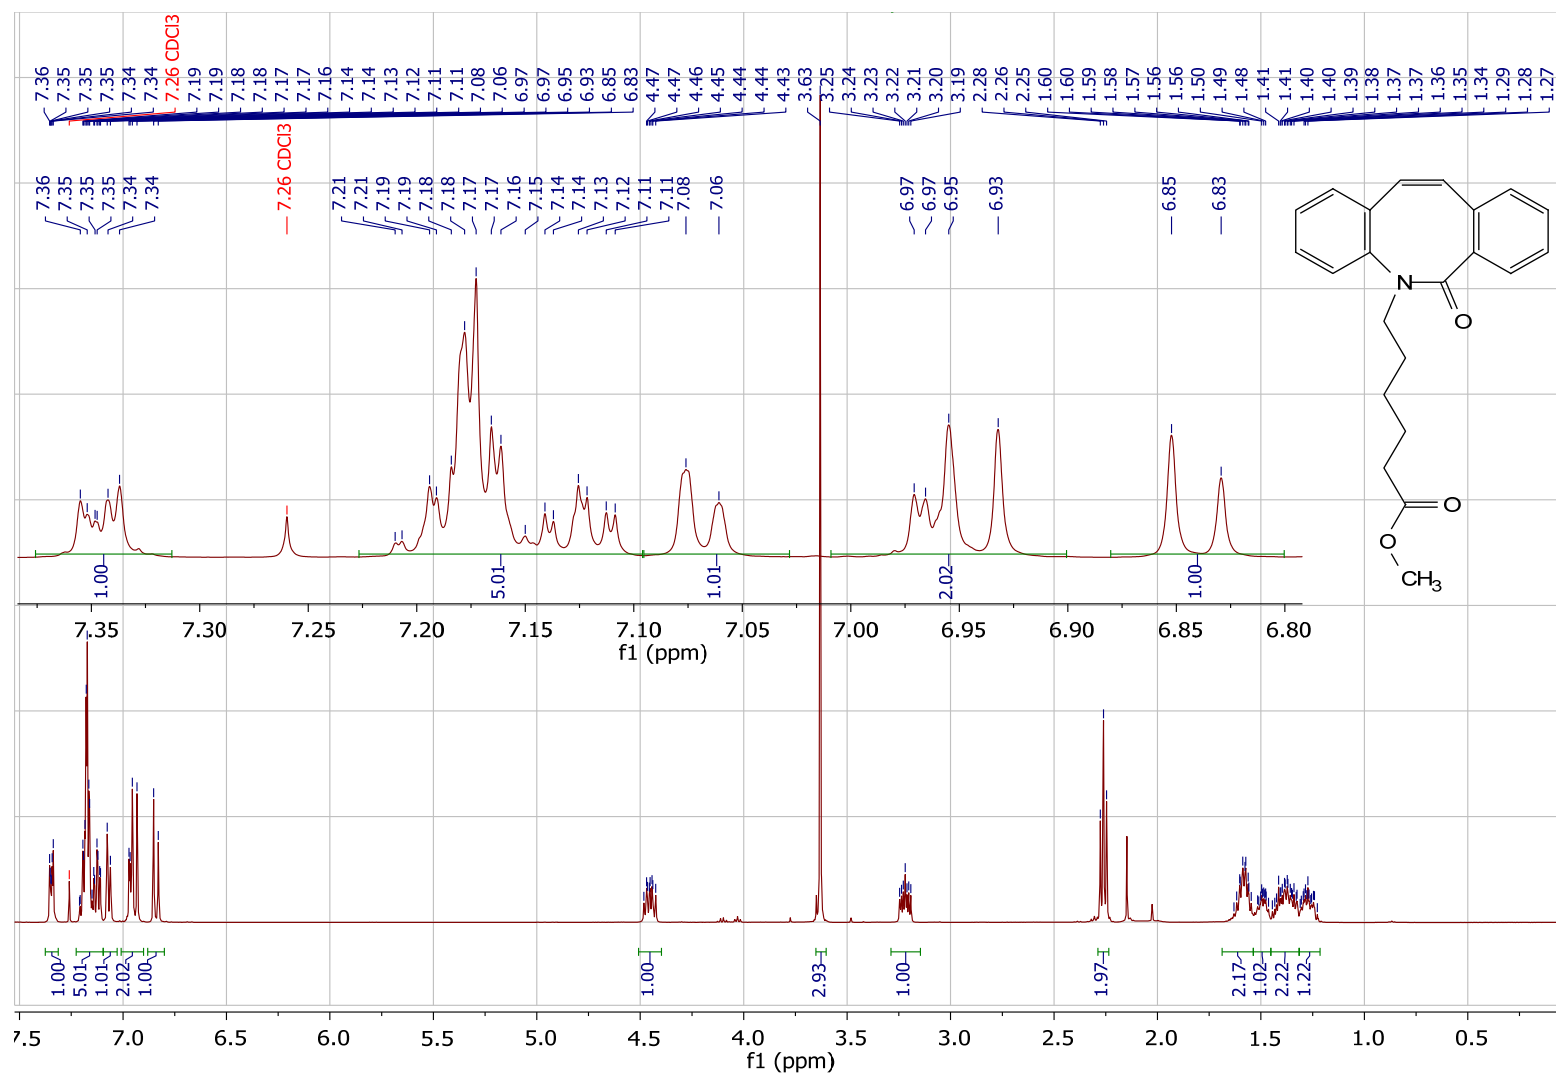

**Figure S11.**  $^1\text{H}$  NMR spectrum of methyl 6-(6-oxodibenzo[*b,f*]azocin-5(6*H*)-yl)hexanoate (**10k**).

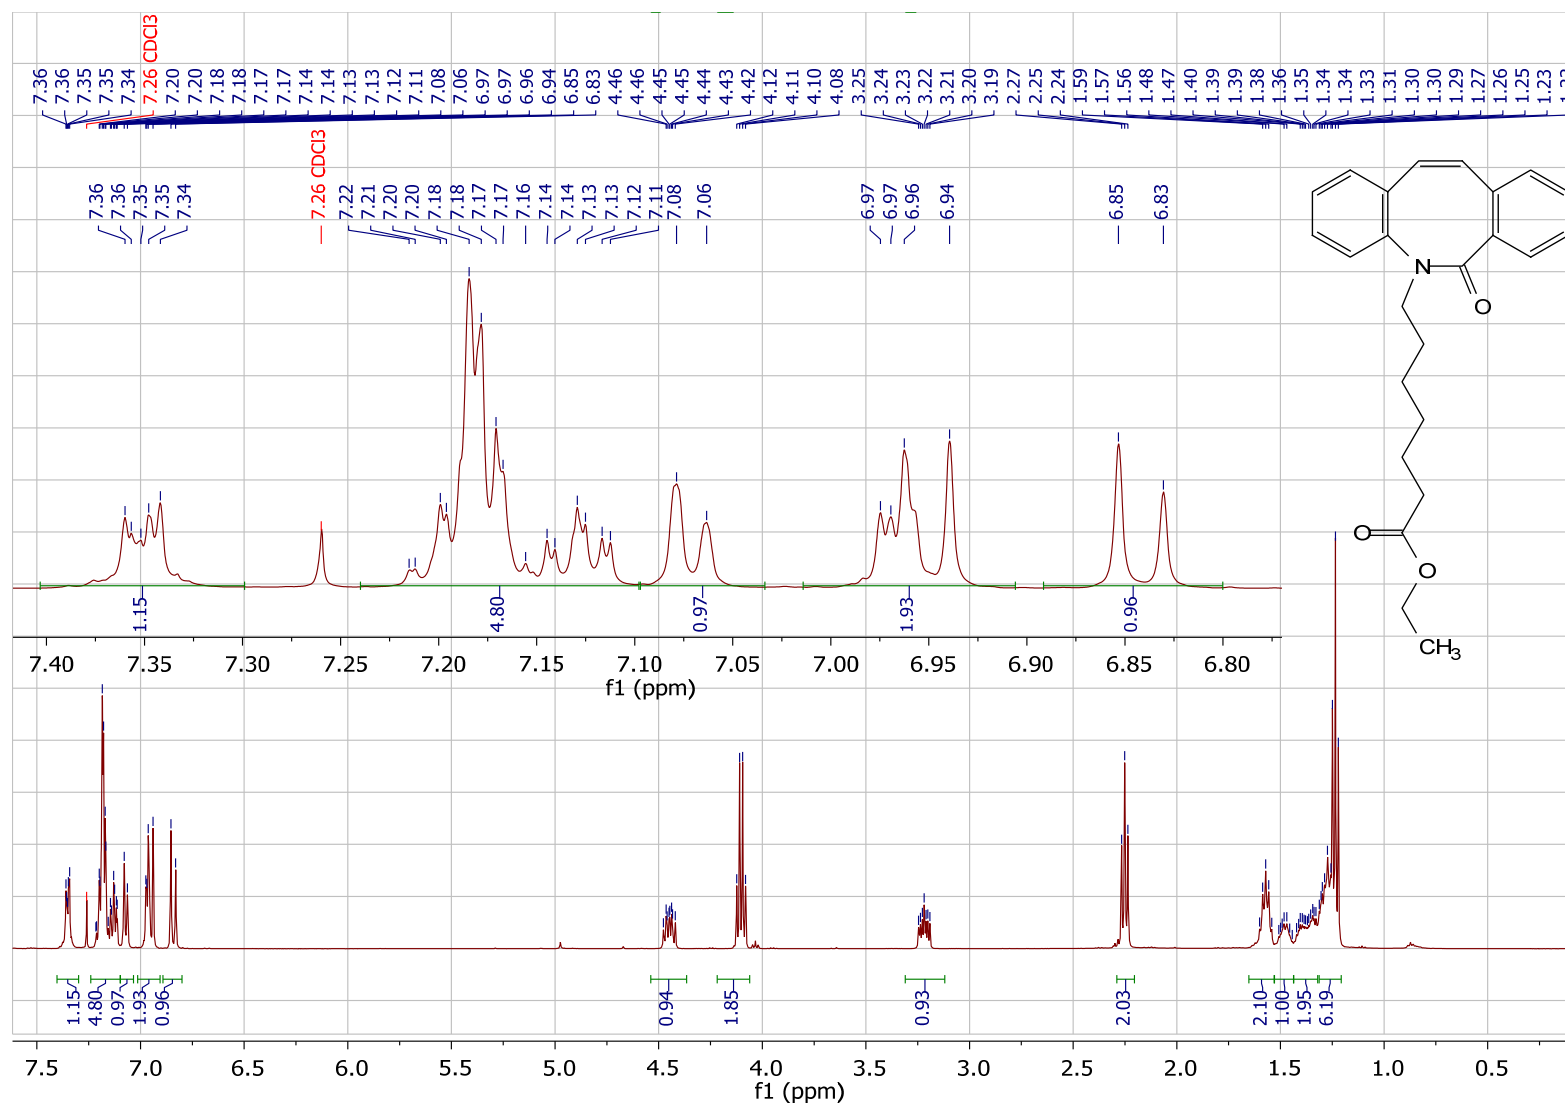

**Figure S12.**  $^1\text{H}$  NMR spectrum of ethyl 7-(6-oxodibenzo[*b,f*]azocin-5(6*H*)-yl)heptanoate (**101**).

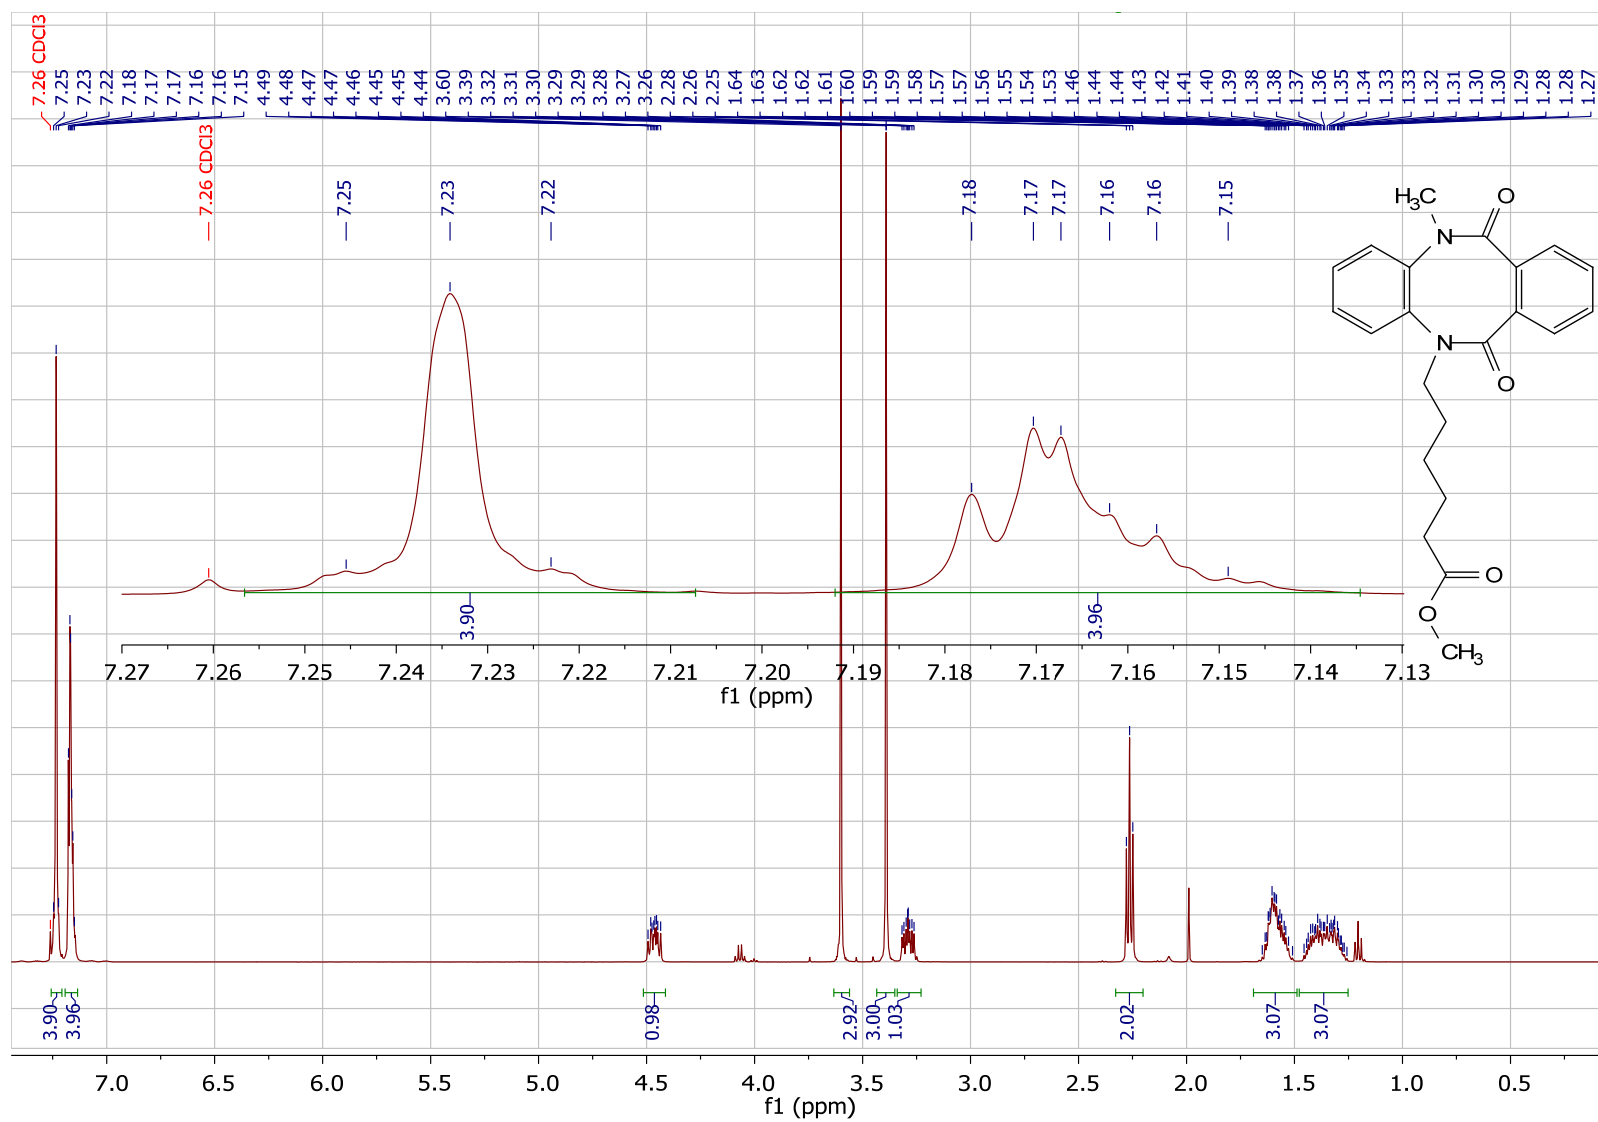

**Figure S13.** <sup>1</sup>H NMR spectrum of methyl 6-(12-methyl-6,11-dioxo-11,12-dihydrodibenzo[*b,f*][1,4]diazocin-5(6*H*)-yl)hexanoate (**10m**).

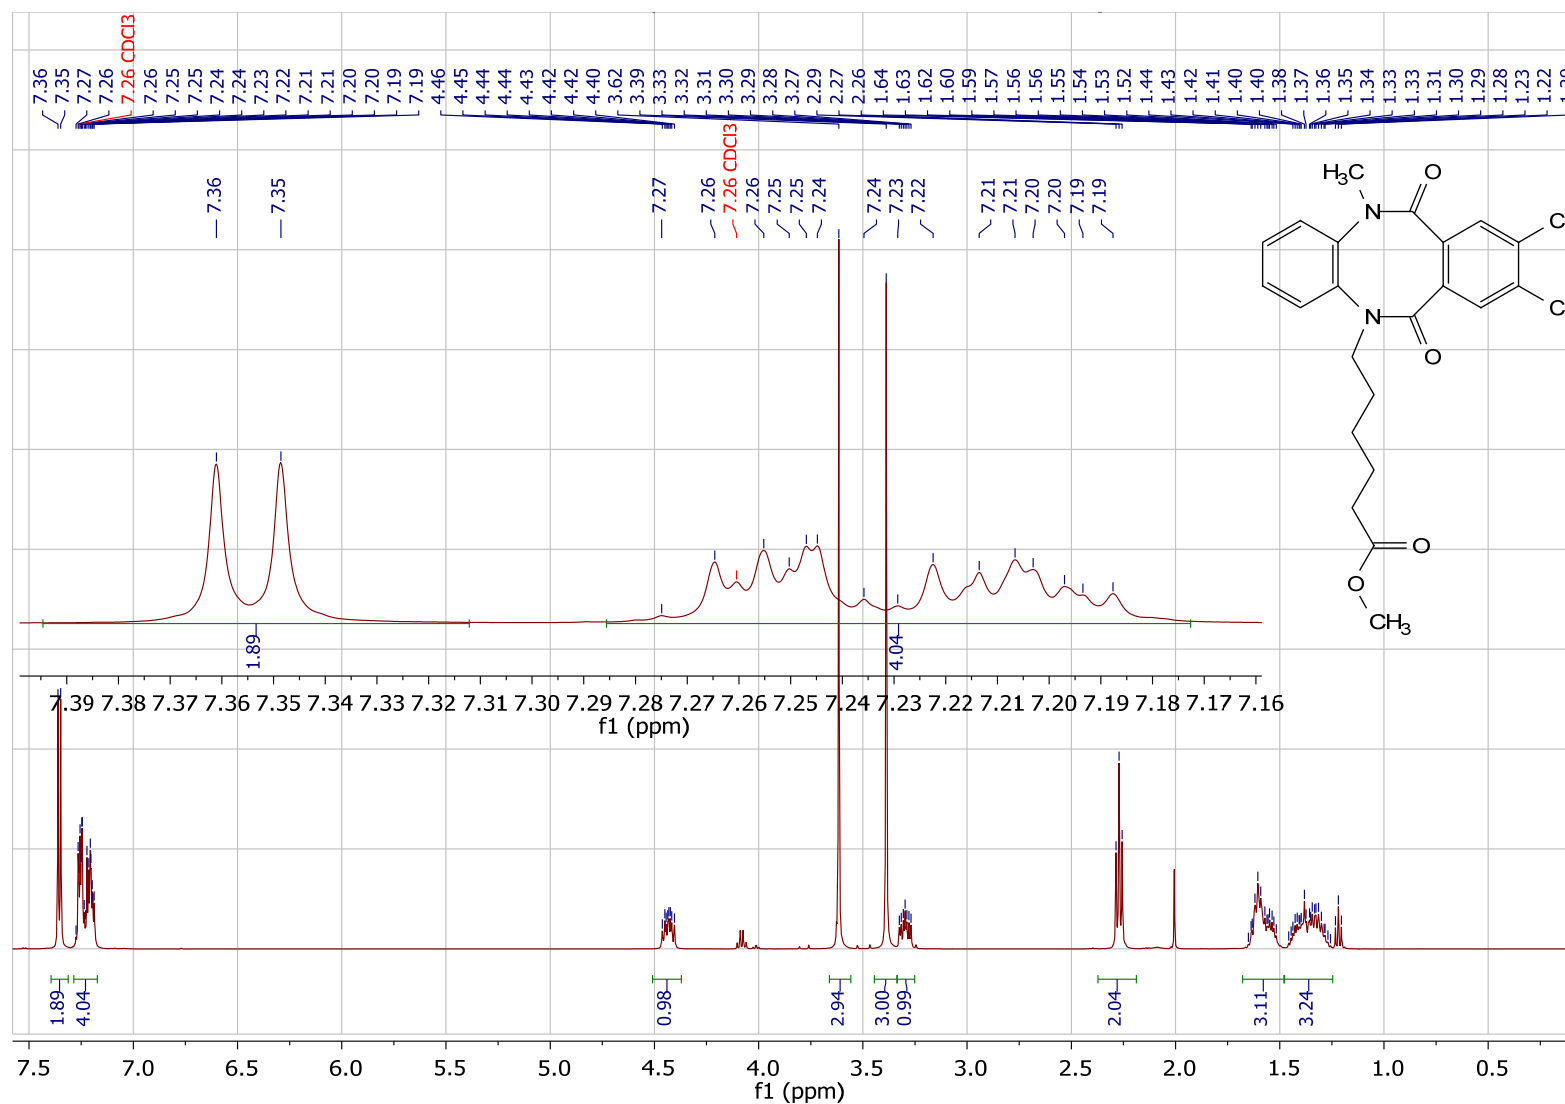

**Figure S14.**  $^1\text{H}$  NMR spectrum of methyl 6-(8,9-dichloro-12-methyl-6,11-dioxo-11,12-dihydrodibenzo[*b,f*][1,4]diazocin-5(6*H*)-yl) hexanoate (**10n**).



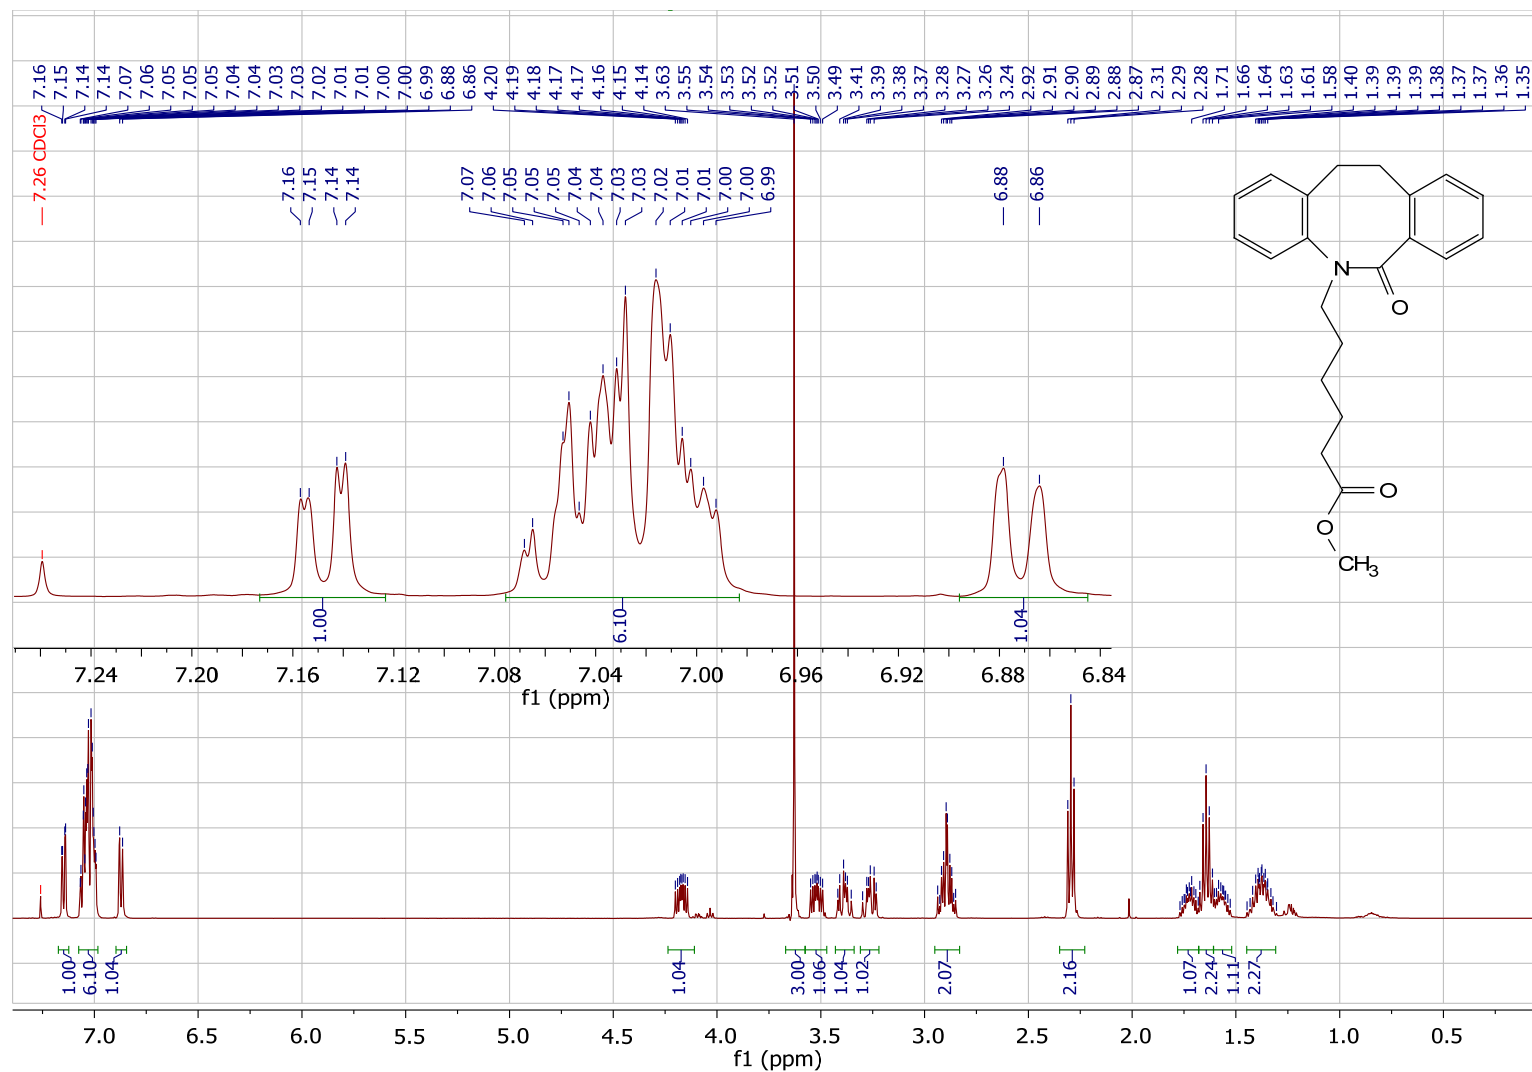

**Figure S16.** <sup>1</sup>H NMR spectrum of methyl 6-(6-oxo-11,12-dihydrodibenzo[b,f]azocin-5(6H)-yl)hexanoate (10p).

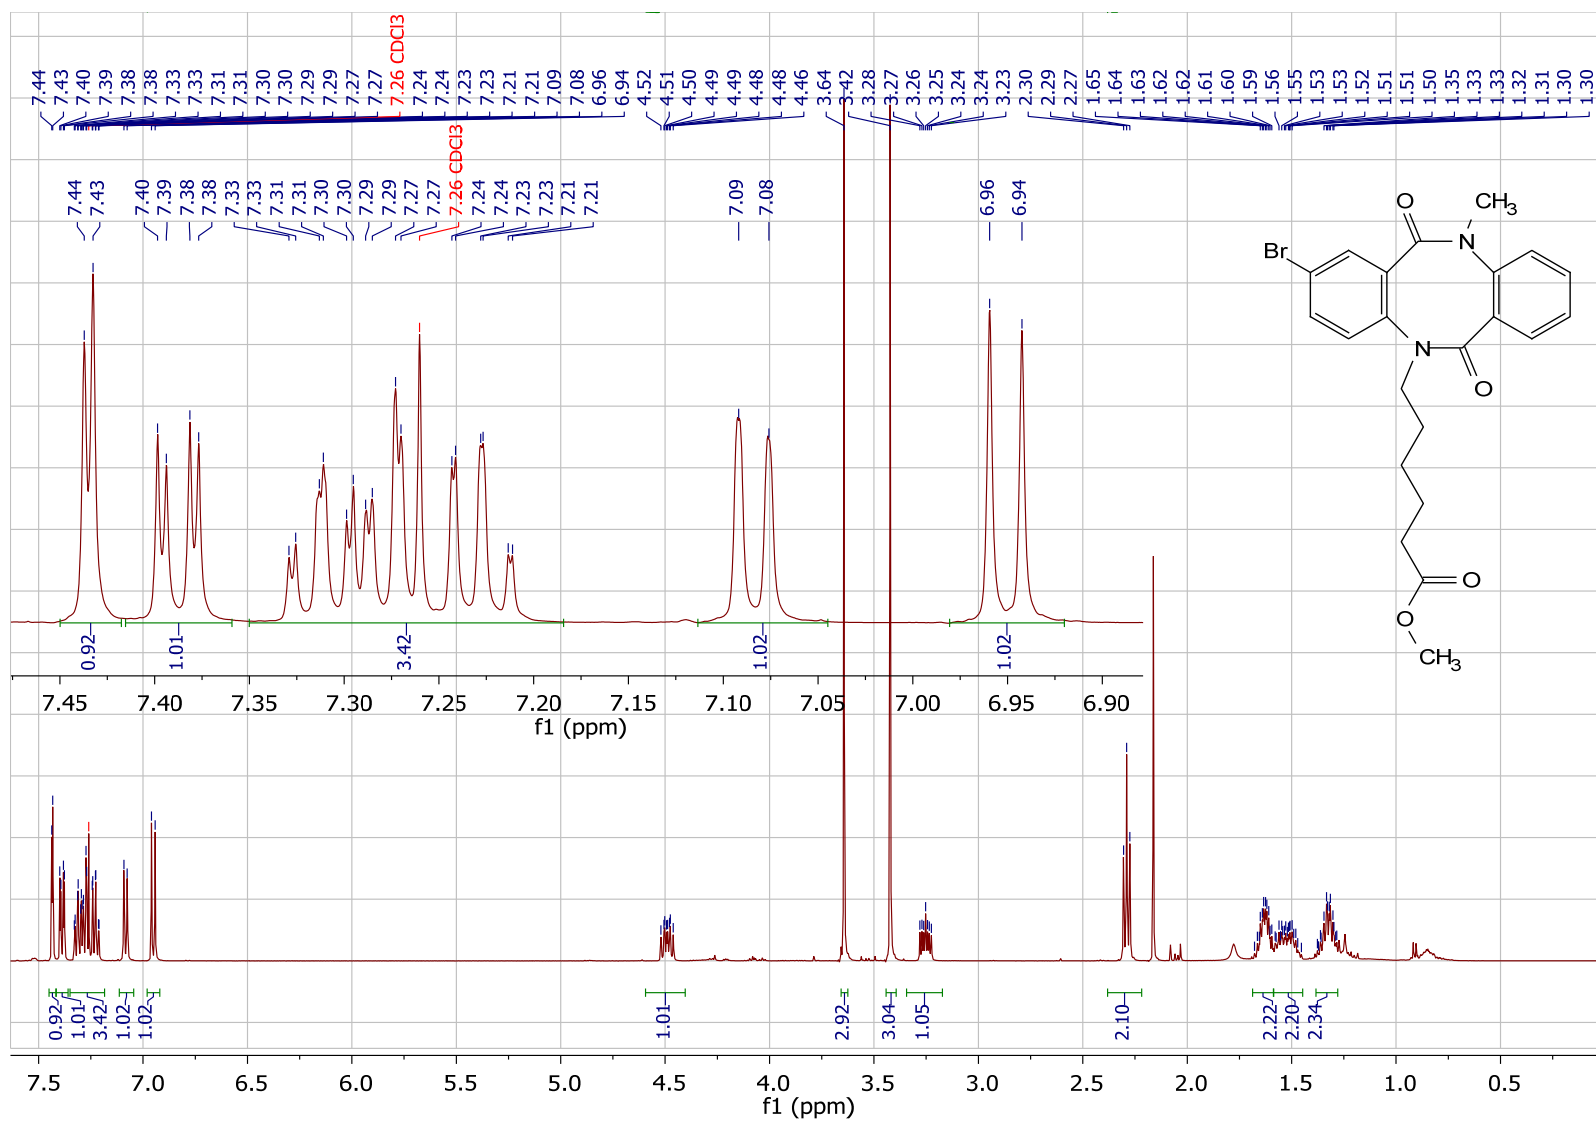

**Figure S17.**  $^1\text{H}$  NMR spectrum of methyl 6-(2-bromo-11-methyl-6,12-dioxo-11,12-dihydrodibenzo[*b,f*][1,5]diazocin-5(6*H*)-yl)hexanoate (**10r**).

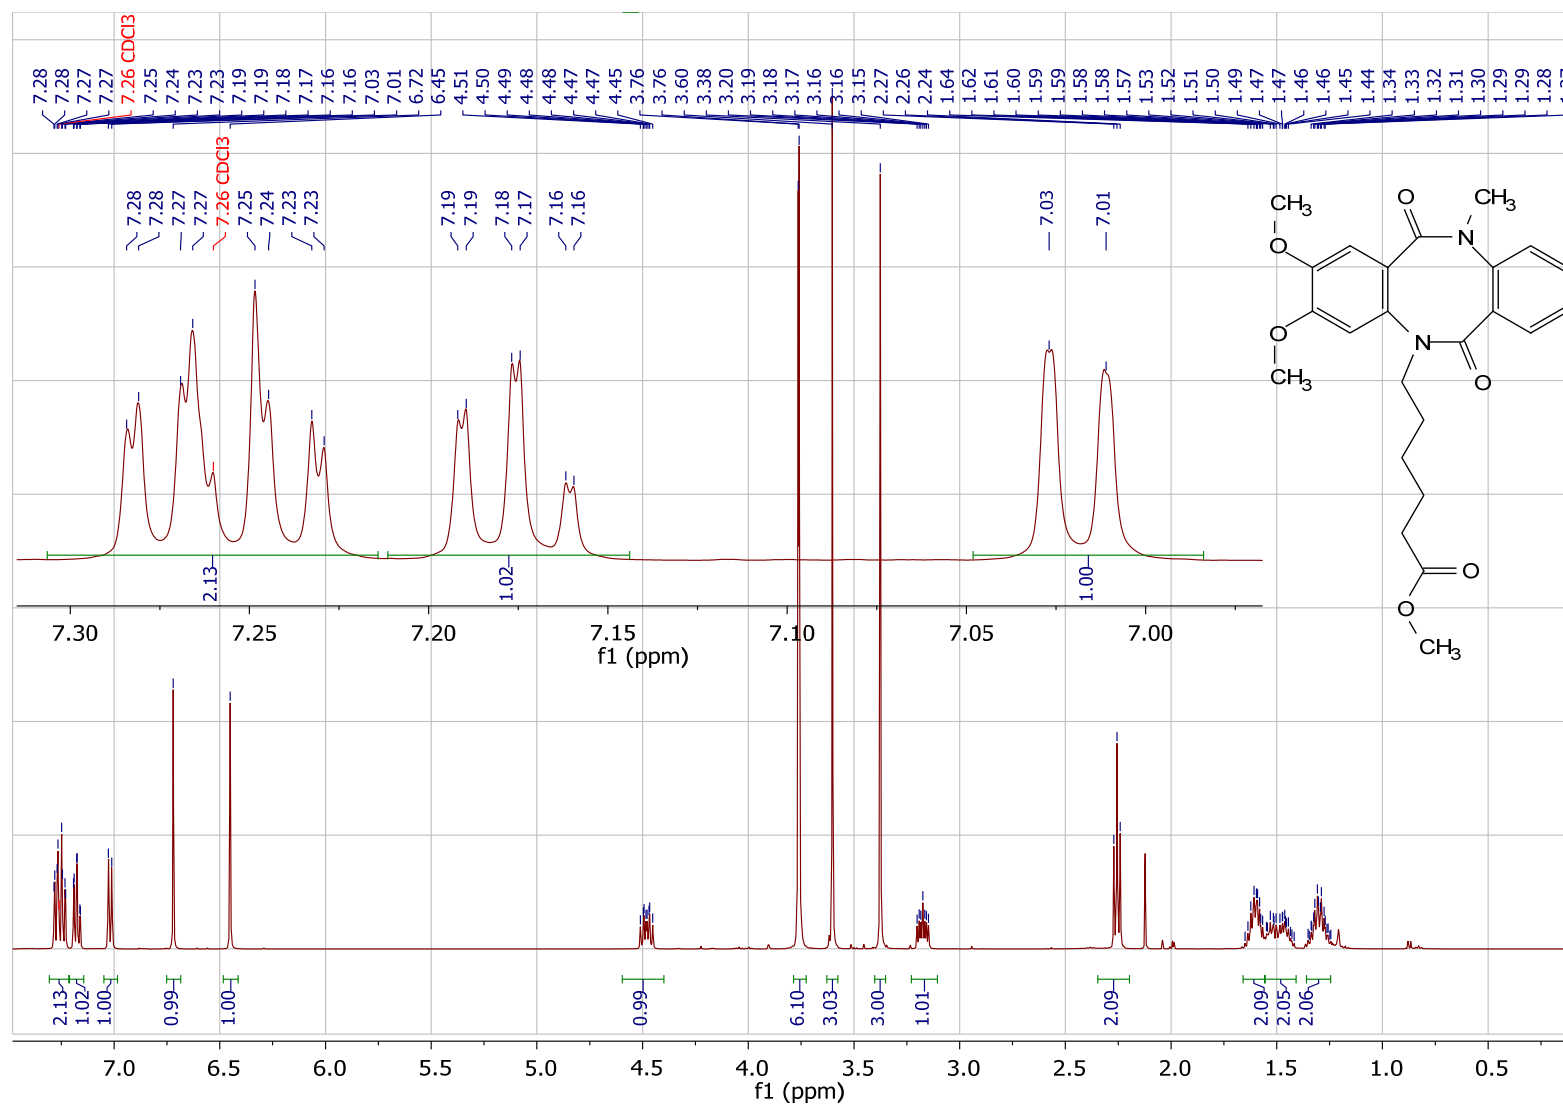

**Figure S18.** <sup>1</sup>H NMR spectrum of methyl 6-(2,3-dimethoxy-11-methyl-6,12-dioxo-11,12-dihydrodibenzo[b,f][1,5]diazocin-5(6H)-yl)hexanoate (10s).

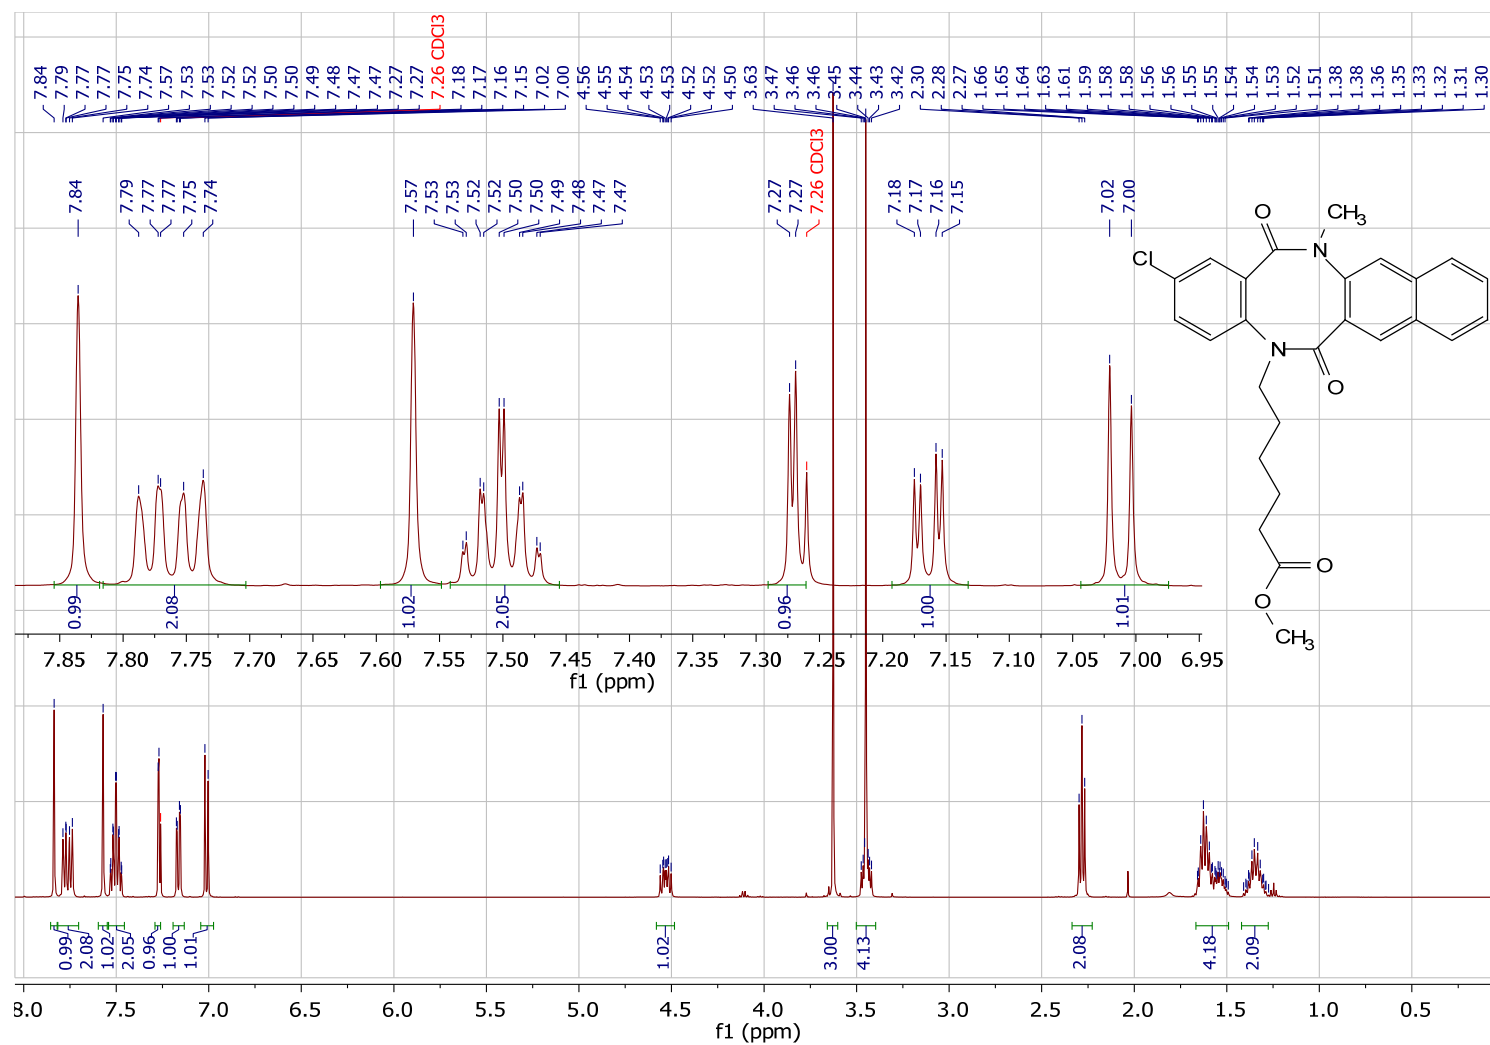

**Figure S19.**  $^1\text{H}$  NMR spectrum of methyl 6-(5-methyl-6,14-dioxo-5,14-dihydrobenzonaphtho[2,3-f][1,5]diazocin-13(6H)-yl)hexanoate (**10t**).

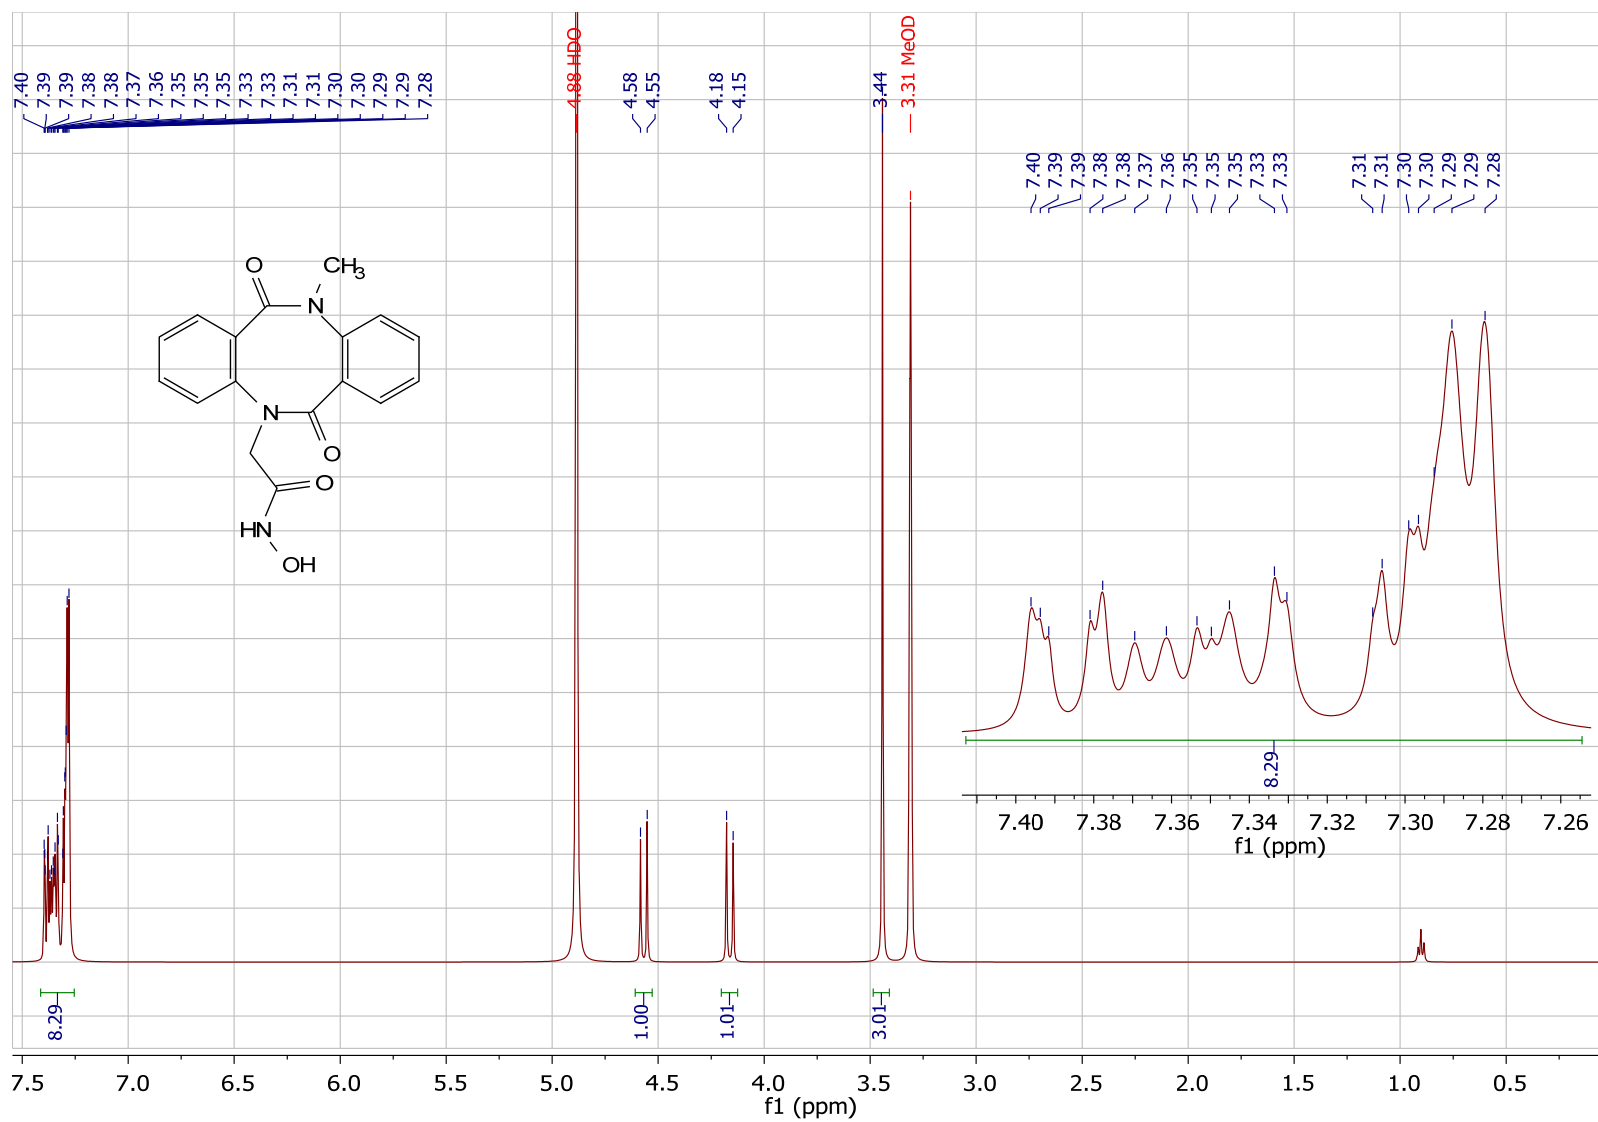

**Figure S20.** <sup>1</sup>H NMR spectrum of *N*-hydroxy-2-(11-methyl-6,12-dioxo-11,12-dihydrodibenzo[*b,f*][1,5]diazocin-5(6*H*)-yl)acetamide (**7a**).

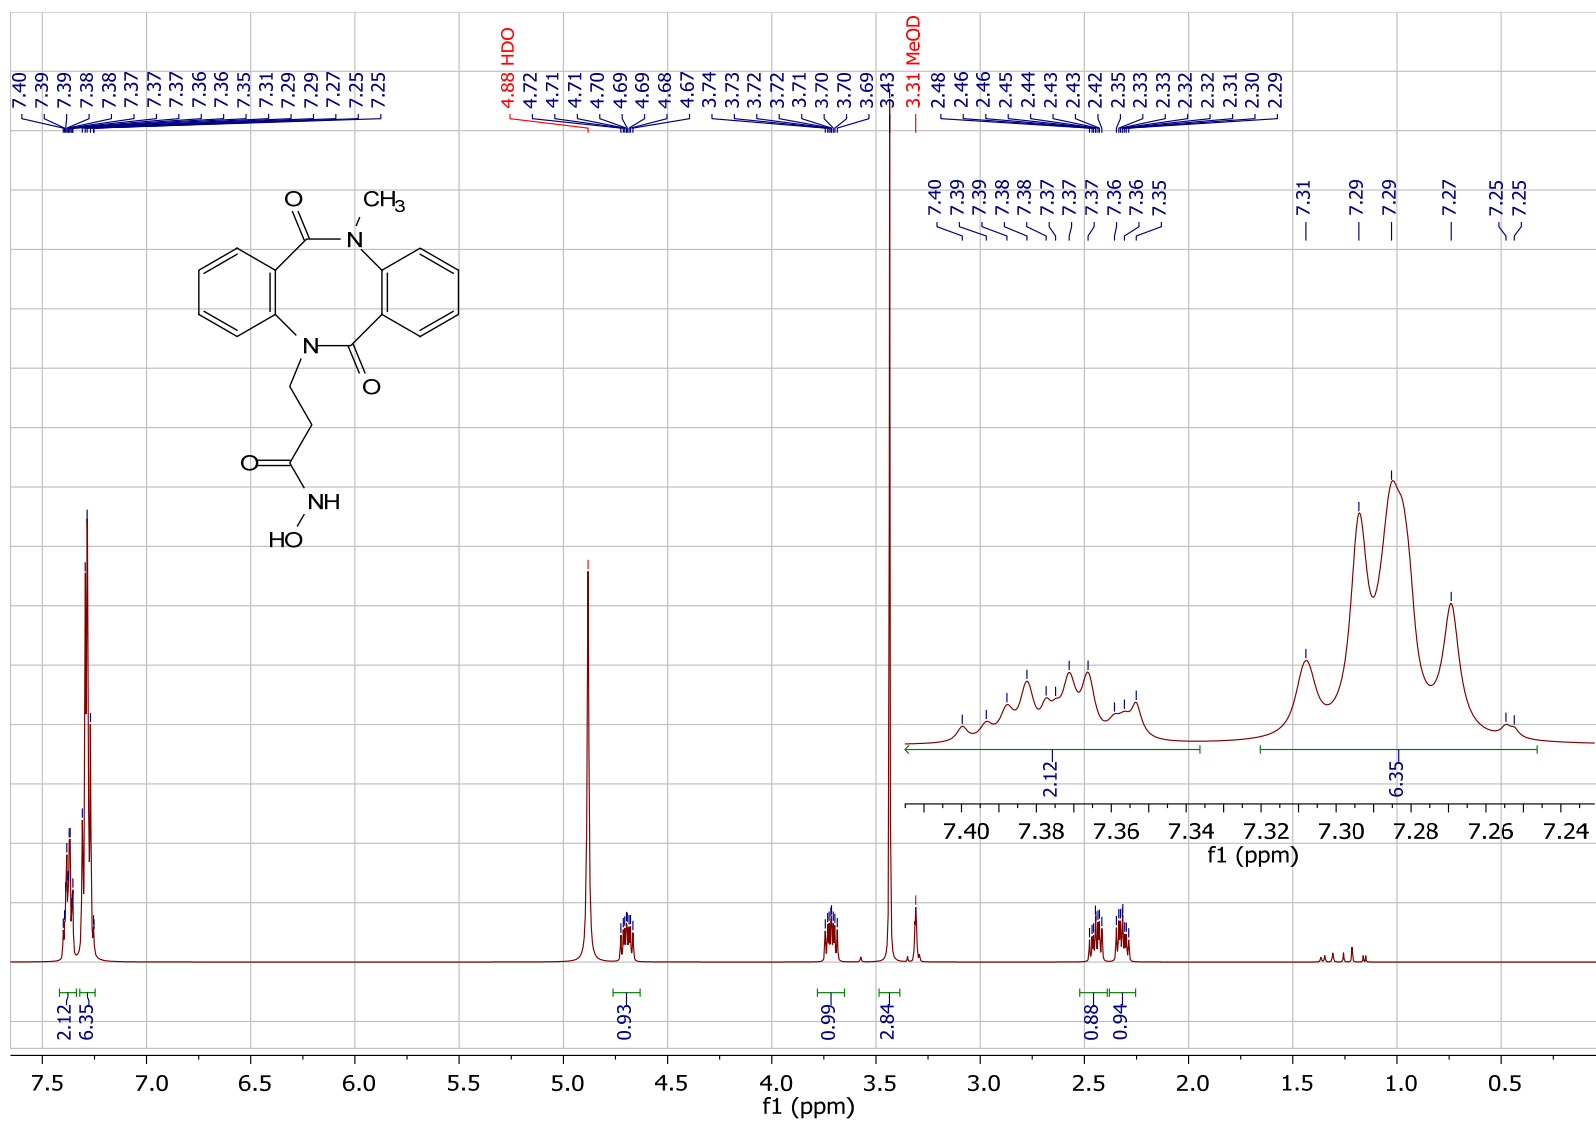

**Figure S21.** <sup>1</sup>H NMR spectrum of *N*-hydroxy-3-(11-methyl-6,12-dioxo-11,12-dihydrodibenzo[*b,f*][1,5]diazocin-5(6*H*)-yl)propanamide (**7b**).

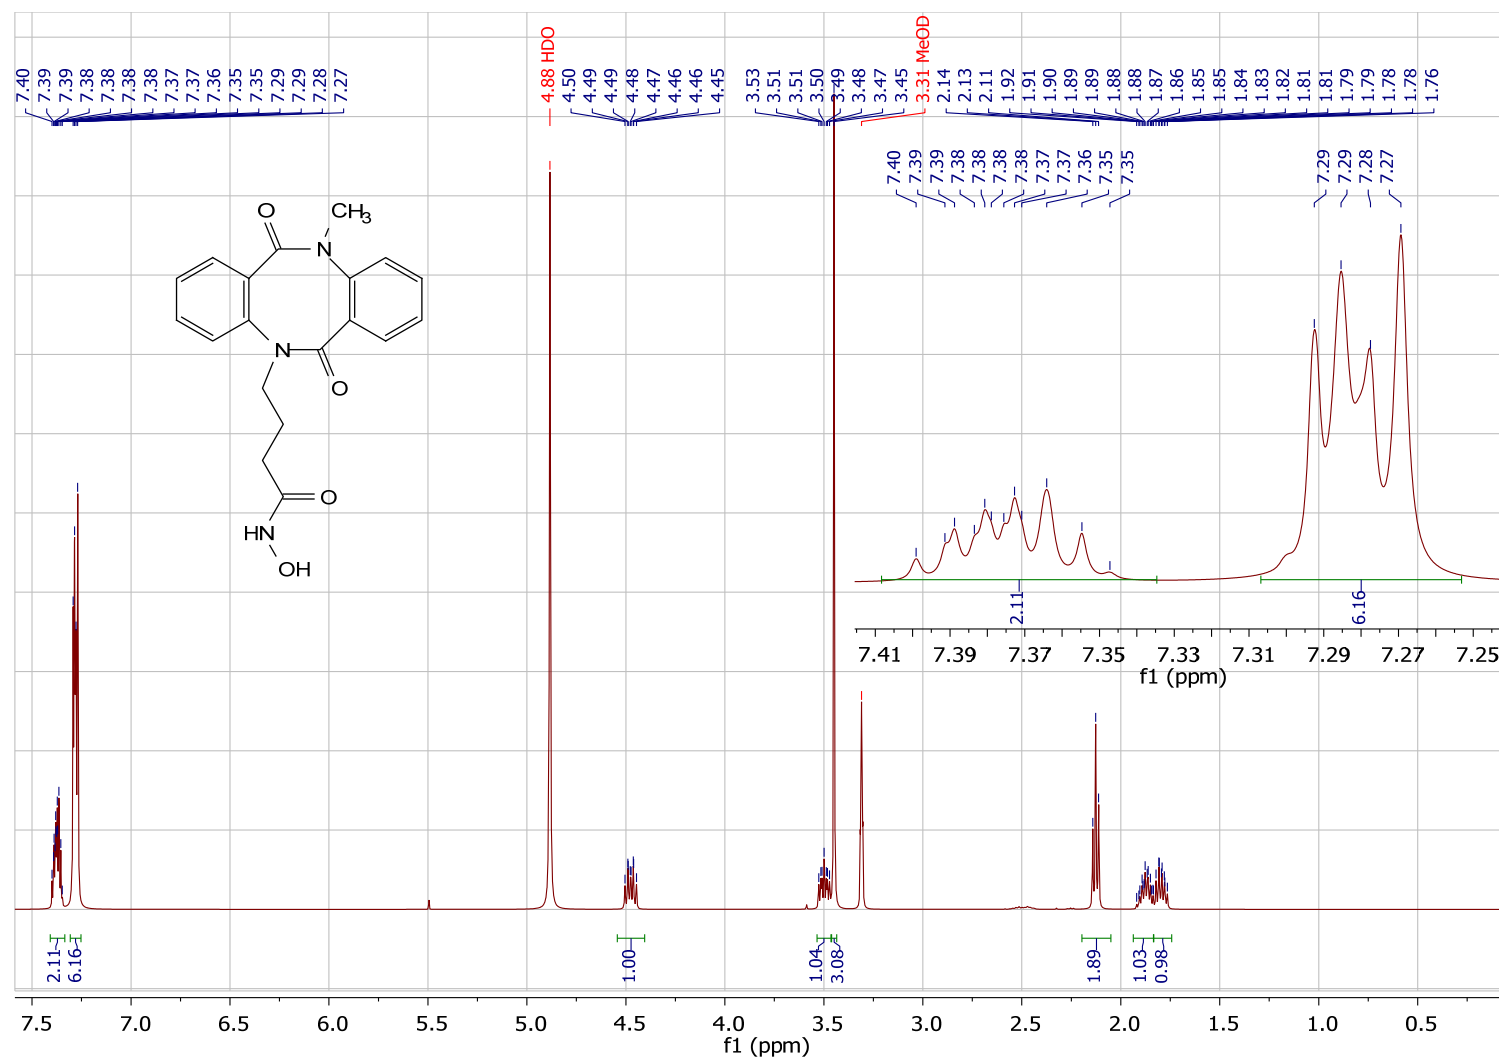

**Figure S22.** <sup>1</sup>H NMR spectrum of *N*-hydroxy-4-(11-methyl-6,12-dioxo-11,12-dihydrodibenzo[*b,f*][1,5]diazocin-5(6*H*)-yl)butanamide (7c).

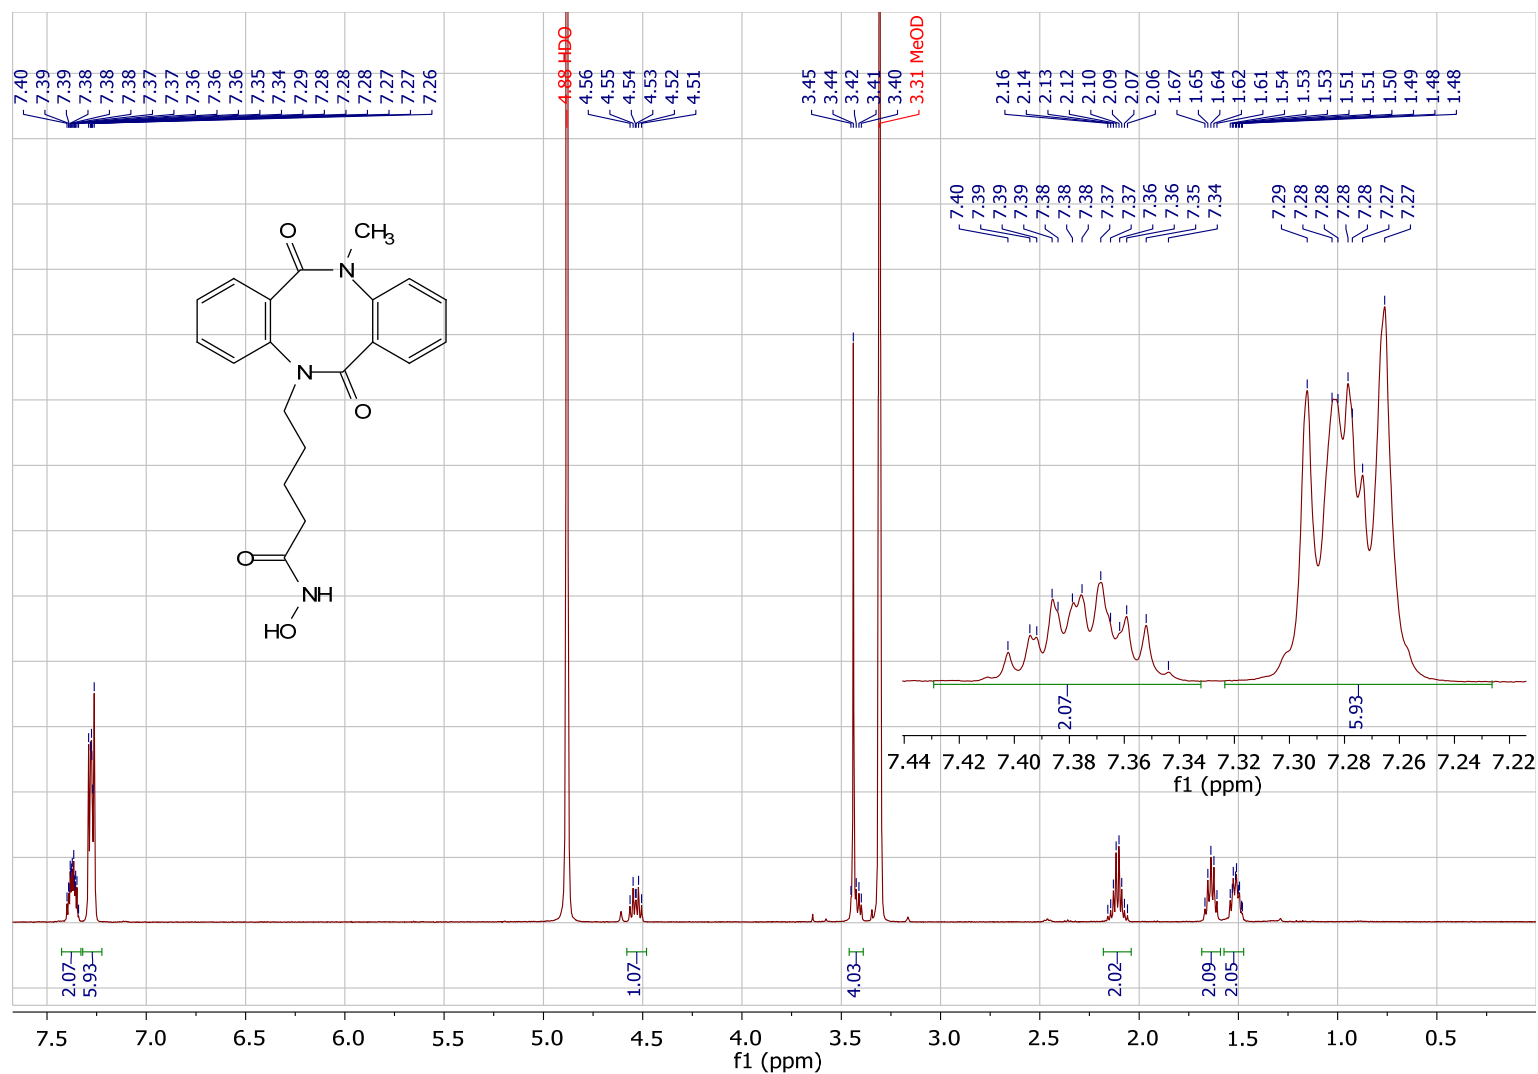

**Figure S23.** <sup>1</sup>H NMR spectrum of *N*-hydroxy-5-(11-methyl-6,12-dioxo-11,12-dihydrodibenzo[*b,f*][1,5]diazocin-5(6*H*)-yl)pentanamide (7d).

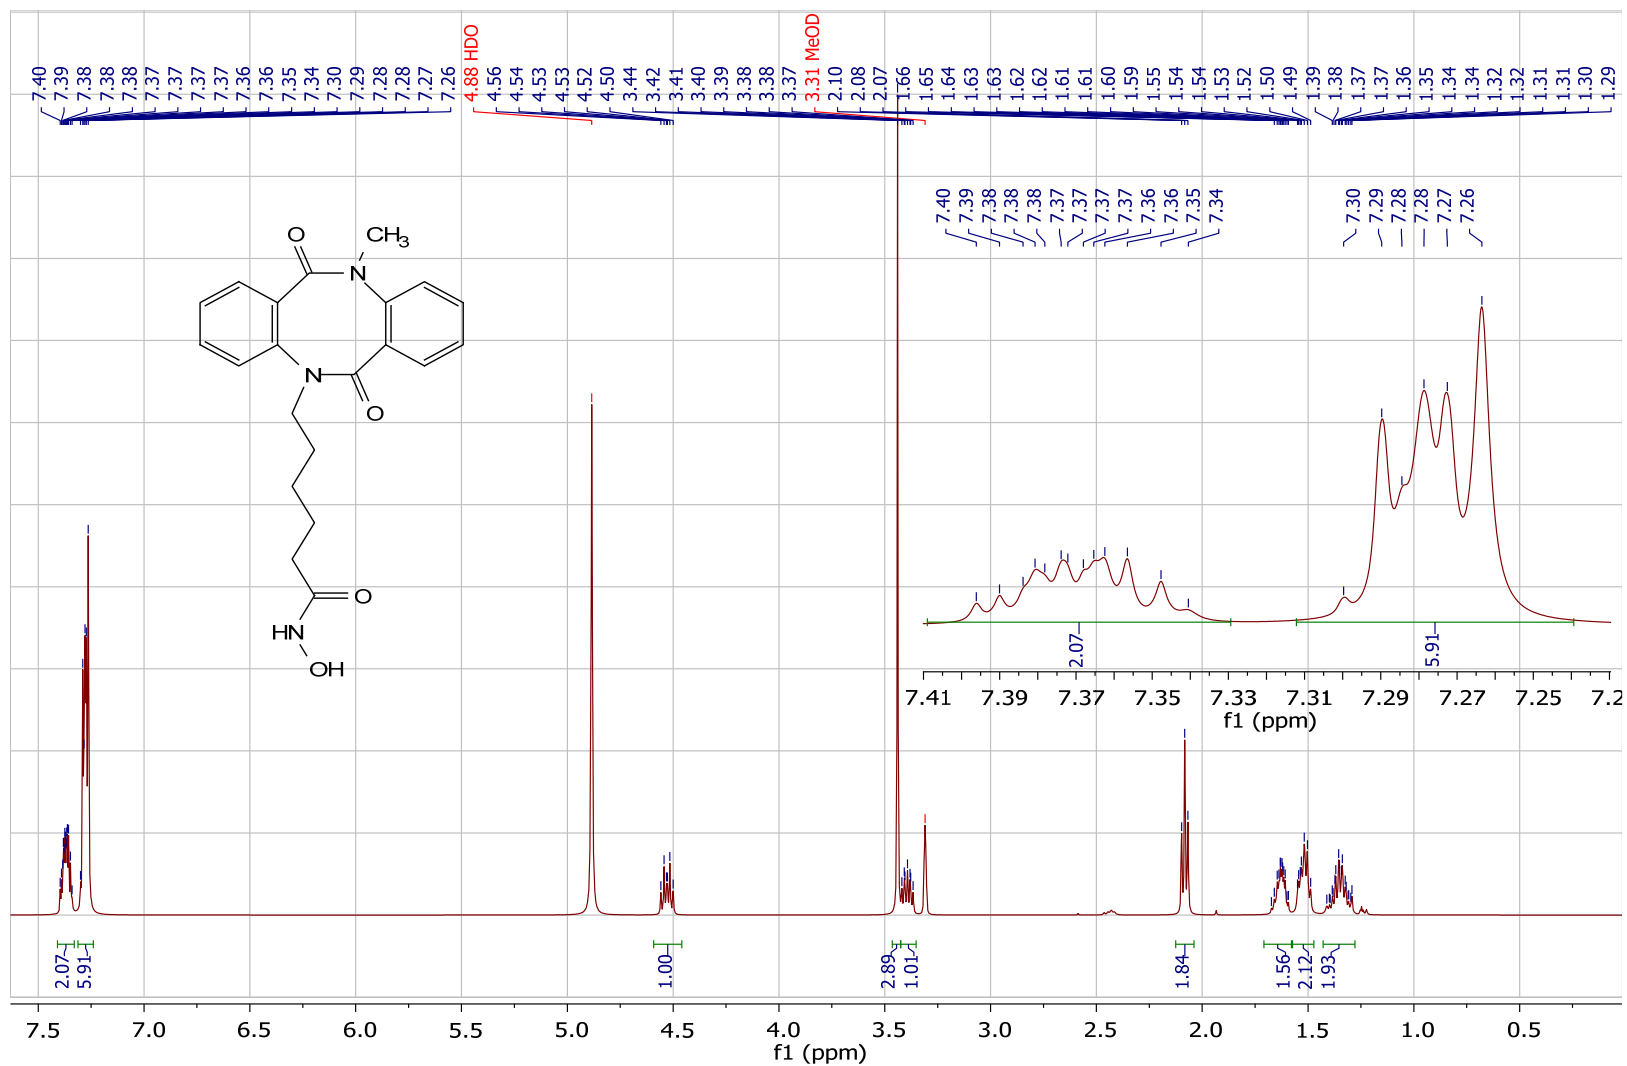

**Figure S24.** <sup>1</sup>H NMR spectrum of *N*-hydroxy-6-(11-methyl-6,12-dioxo-11,12-dihydrodibenzo[*b,f*][1,5]diazocin-5(6*H*)-yl)hexanamide (**7e**).

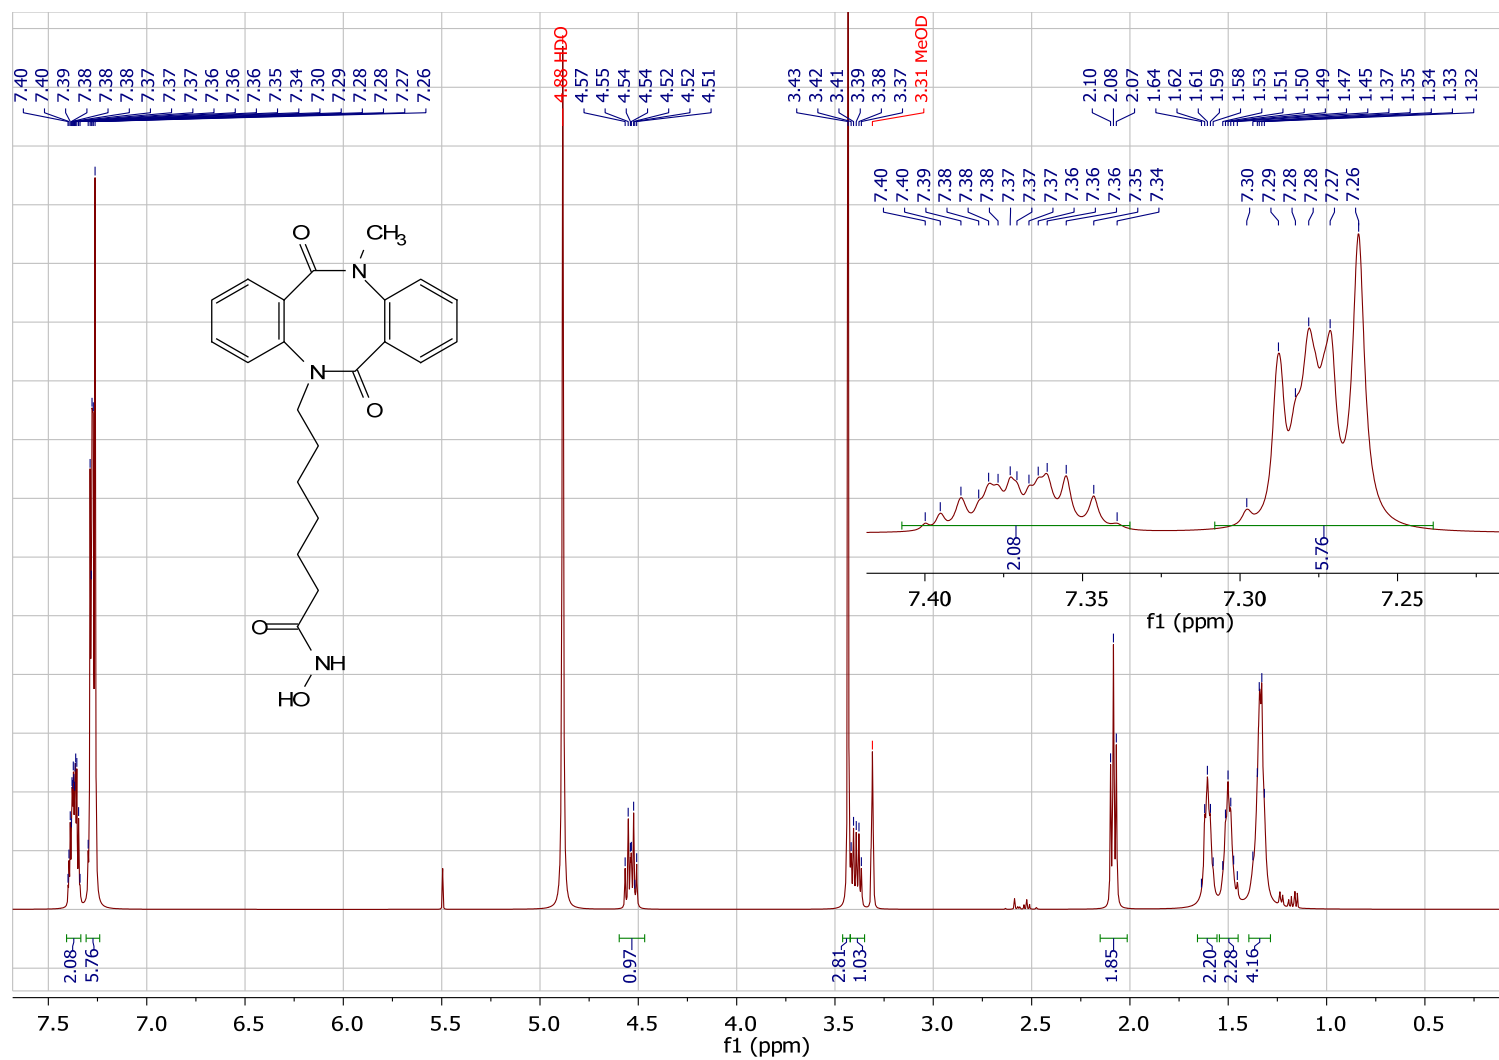

**Figure S25.** <sup>1</sup>H NMR spectrum of *N*-hydroxy-7-(11-methyl-6,12-dioxo-11,12-dihydrodibenzo[*b,f*][1,5]diazocin-5(6*H*)-yl)heptanamide (**7f**).

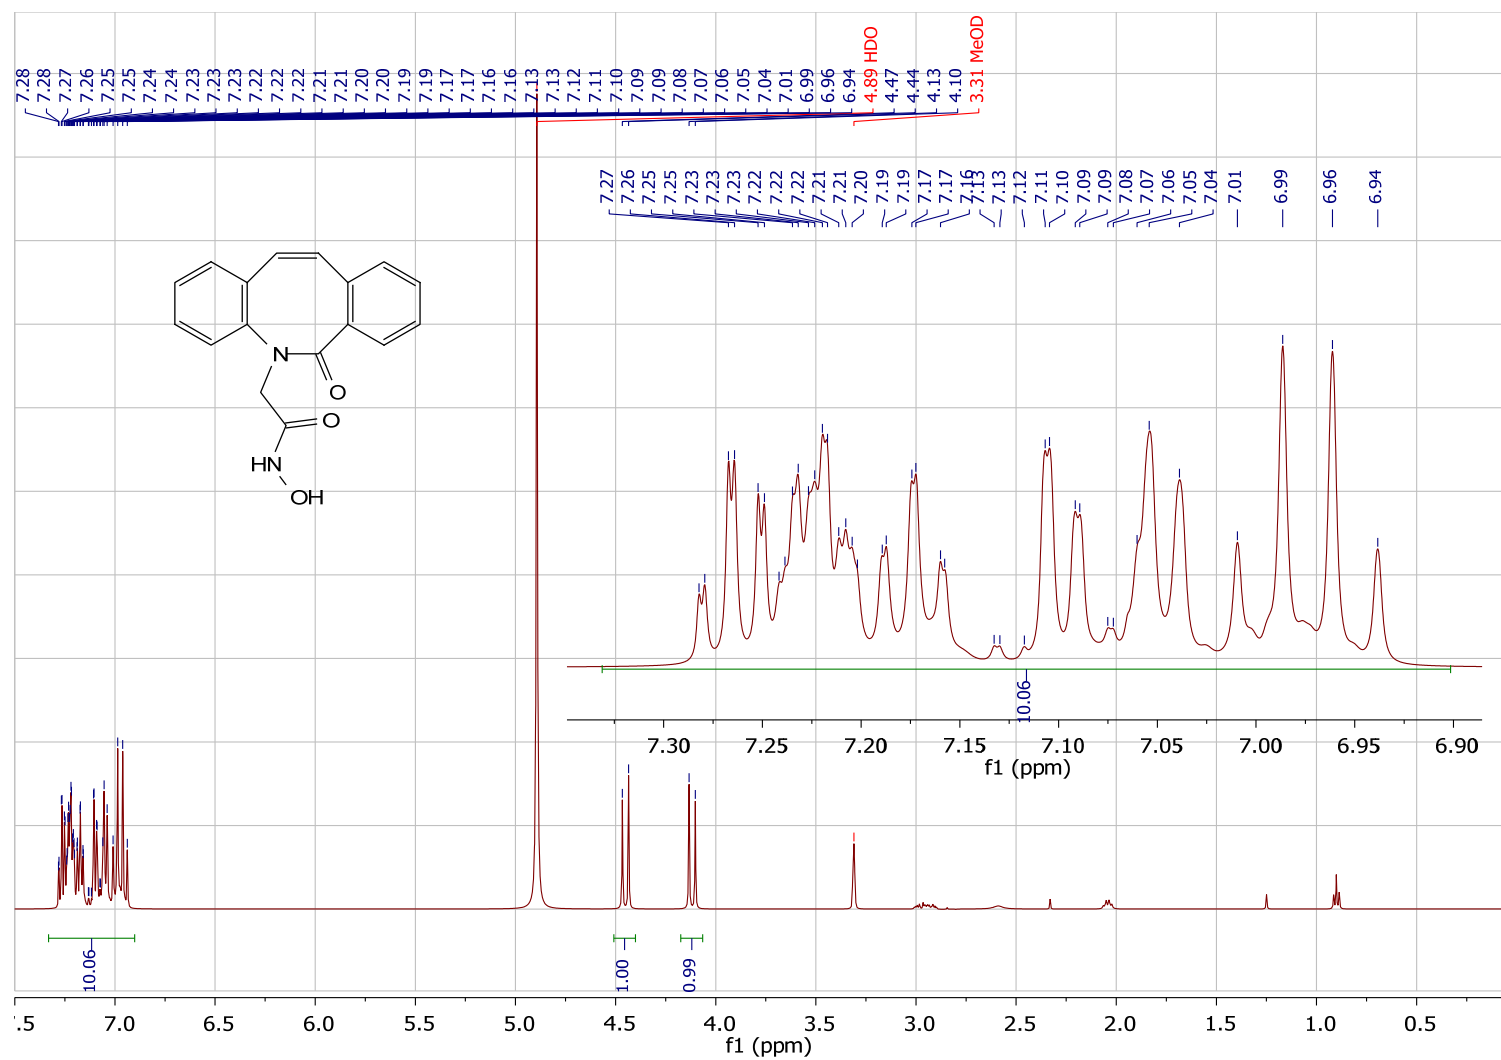

**Figure S26.** <sup>1</sup>H NMR spectrum of *N*-hydroxy-2-(6-oxodibenzo[*b,f*]azocin-5(6*H*)-yl)acetamide (7g).

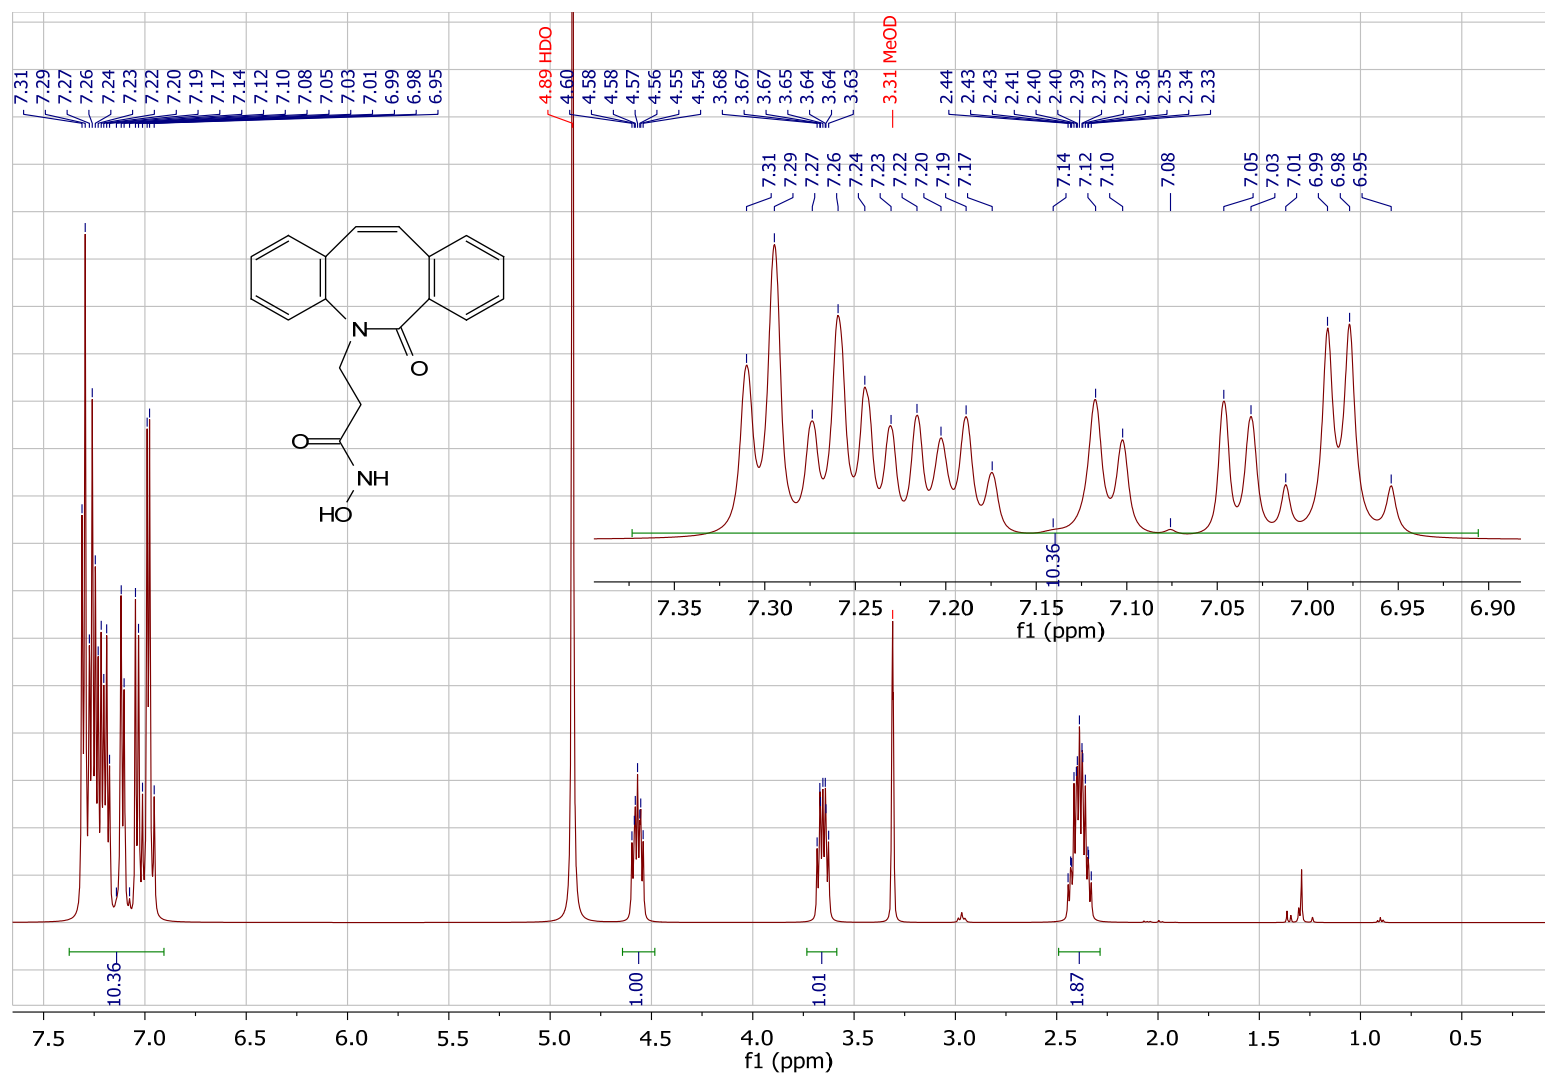

**Figure S27.** <sup>1</sup>H NMR spectrum of *N*-hydroxy-3-(6-oxodibenzo[*b,f*]azocin-5(6*H*)-yl)propanamide (7h).

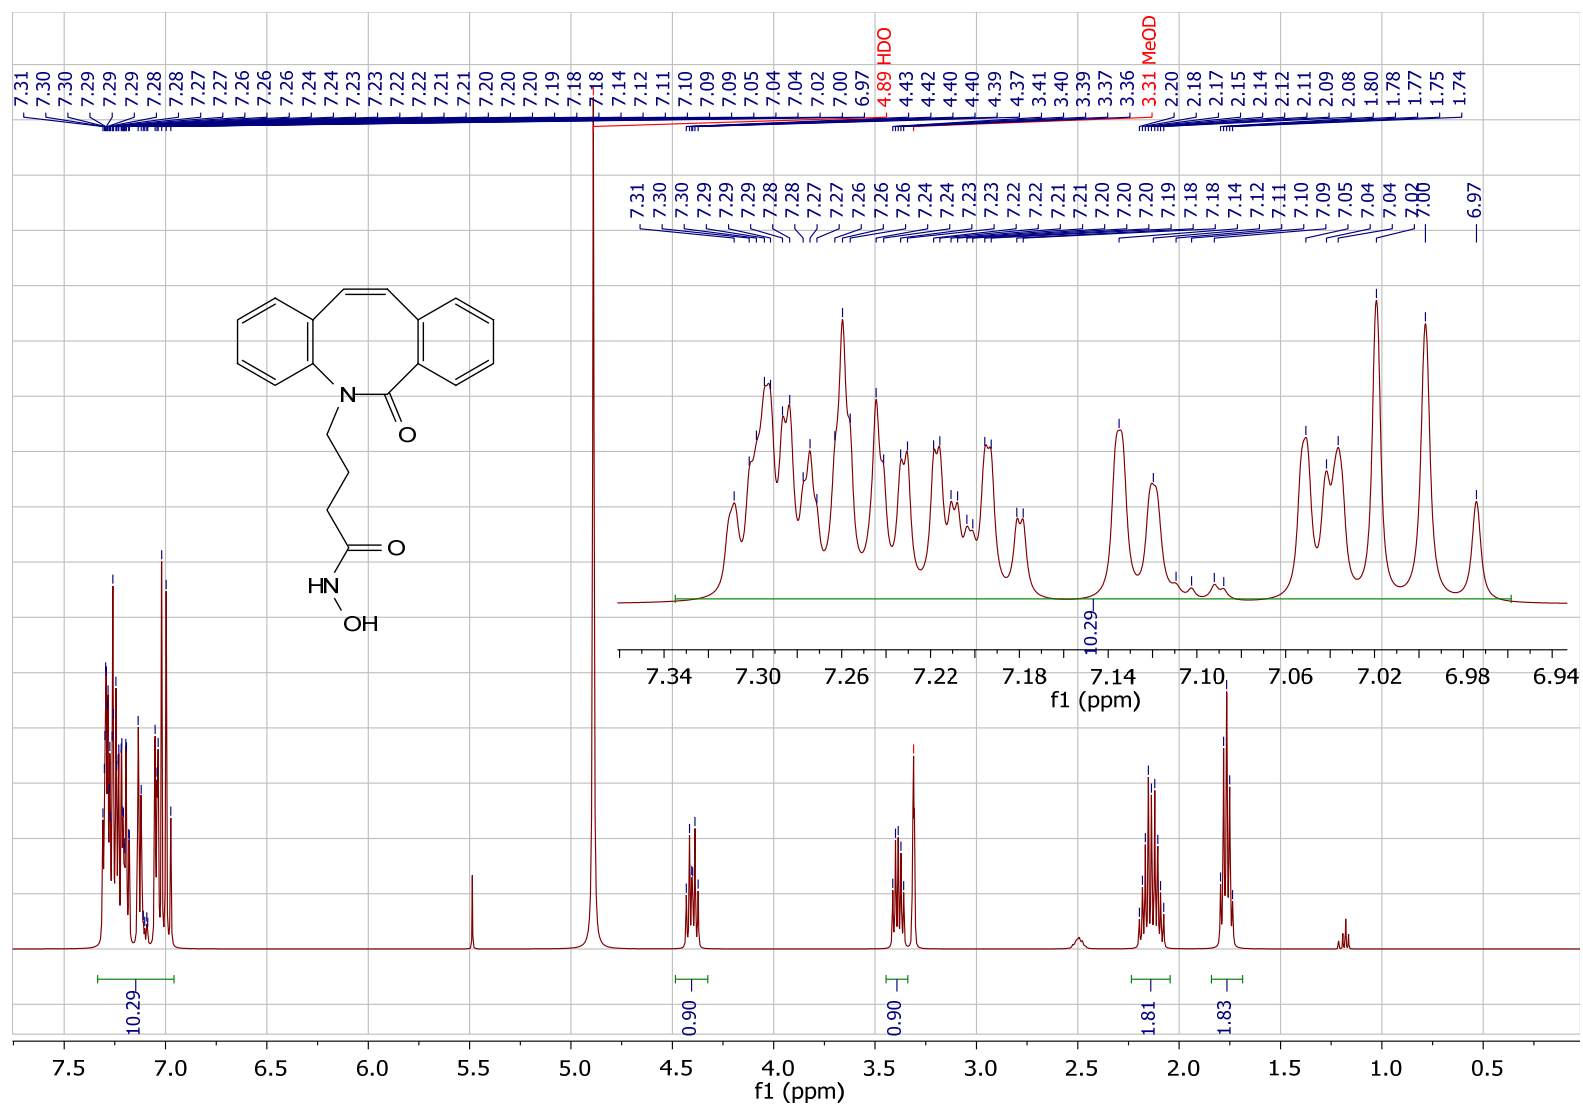

**Figure S28.** <sup>1</sup>H NMR spectrum of *N*-hydroxy-4-(6-oxodibenzo[*b,f*]azocin-5(6*H*)-yl)butanamide (7i).

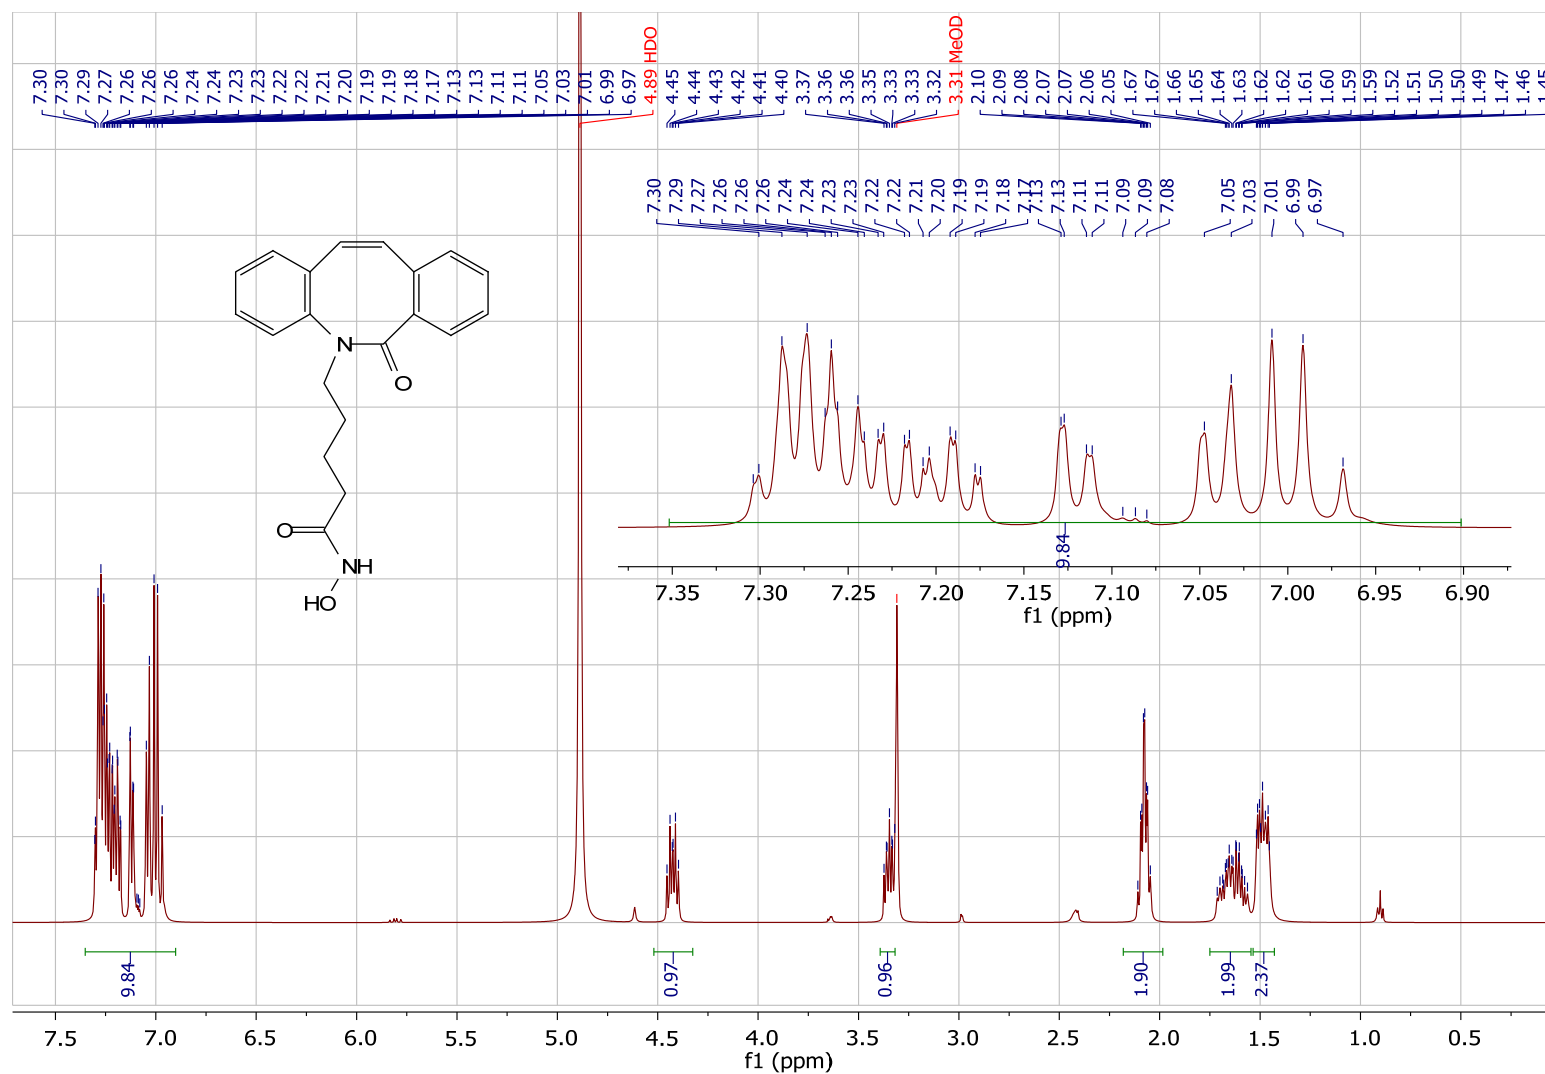

**Figure S29.** <sup>1</sup>H NMR spectrum of *N*-hydroxy-5-(6-oxodibenzo[*b,f*]azocin-5(6*H*)-yl)pentanamide (7j).

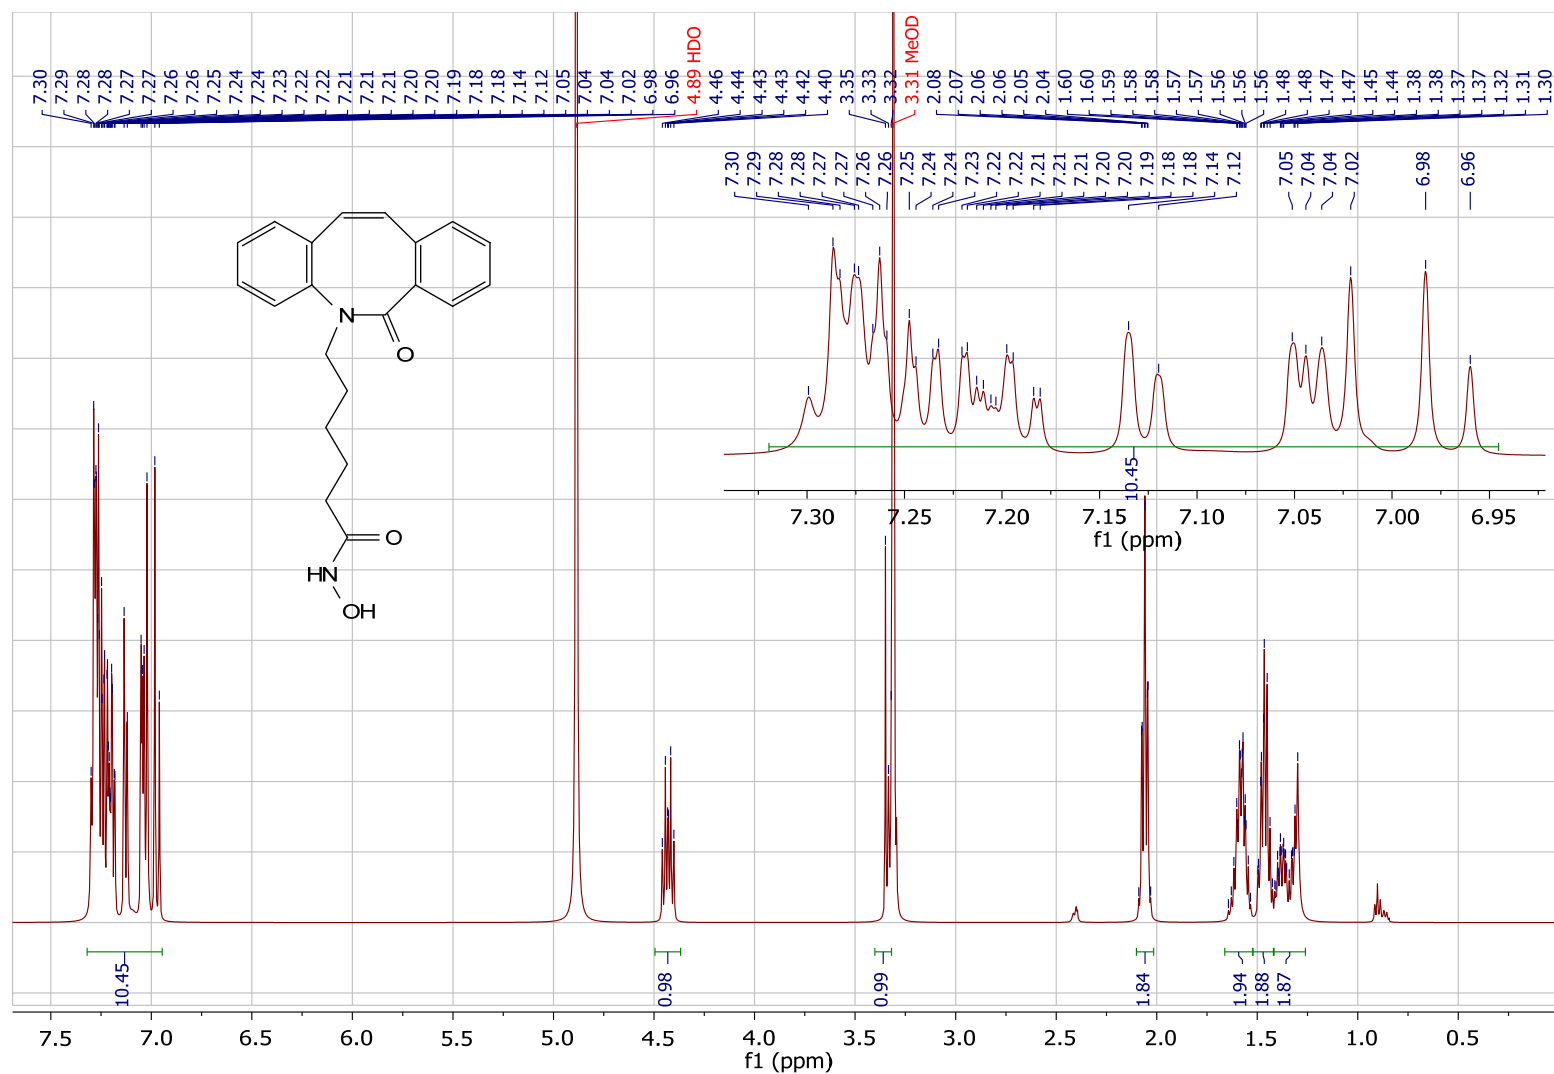

Figure S30. <sup>1</sup>H NMR spectrum of *N*-hydroxy-6-(6-oxodibenzo[*b,f*]azocin-5(6*H*)-yl)hexanamide (7k).

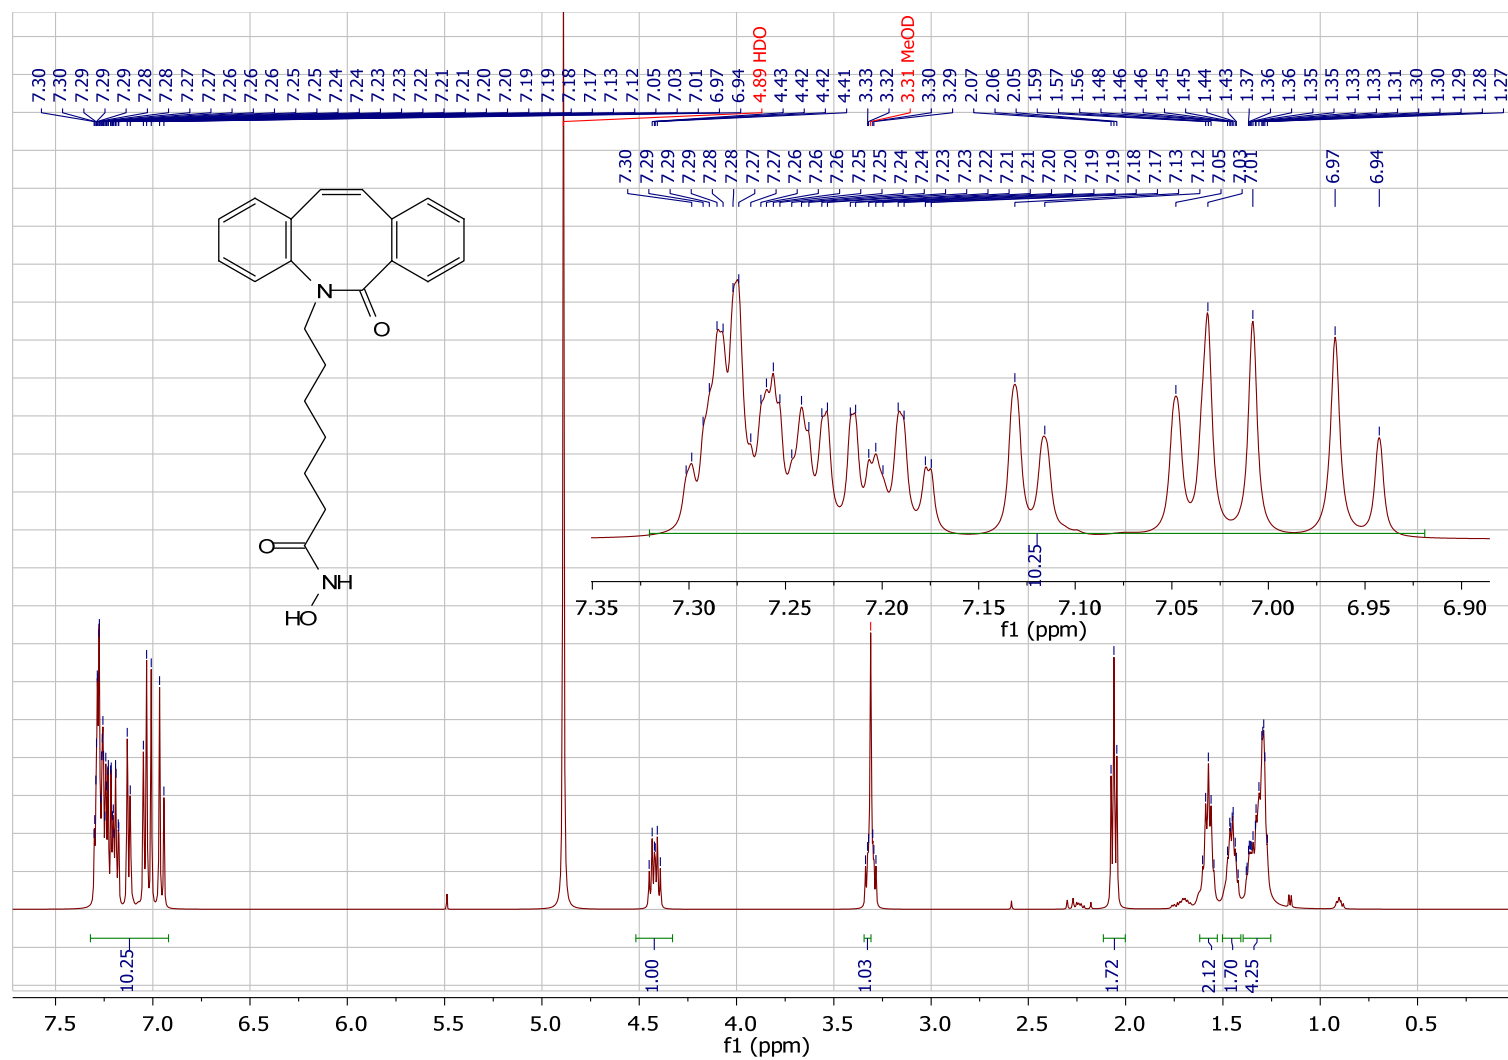

**Figure S31.** <sup>1</sup>H NMR spectrum of *N*-hydroxy-7-(6-oxodibenzo[*b,f*]azocin-5(6*H*)-yl)heptanamide (71).

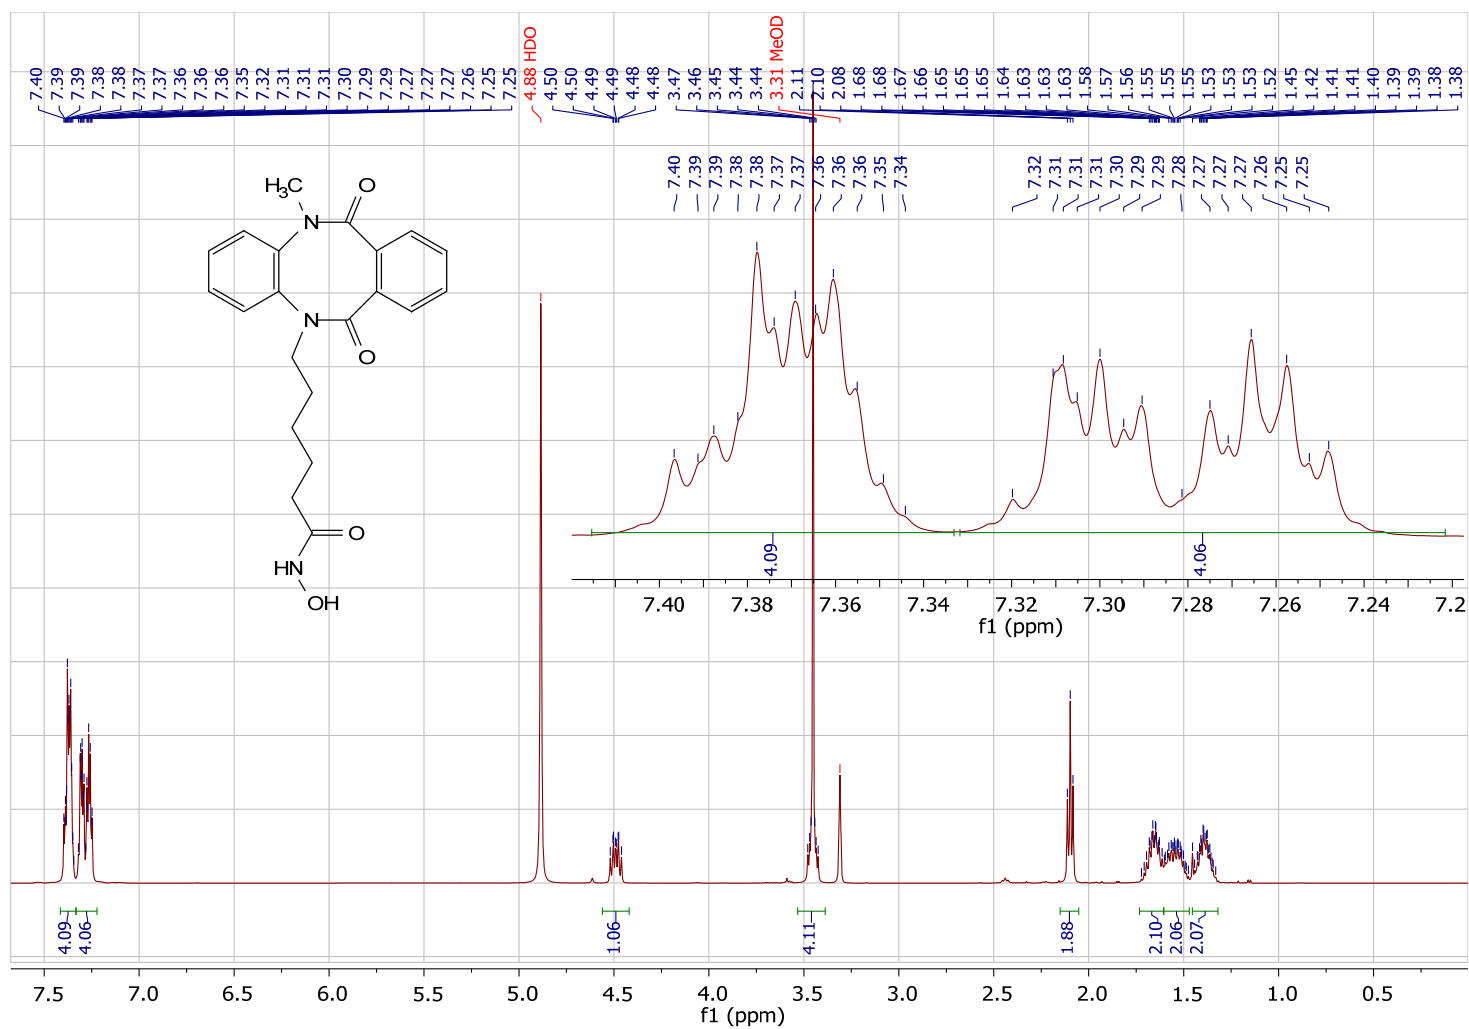

**Figure S32.** <sup>1</sup>H NMR spectrum of *N*-hydroxy-6-(12-methyl-6,11-dioxo-11,12-dihydrodibenzo[*b,f*][1,4]diazocin-5(6*H*)-yl)hexanamide (**7m**).

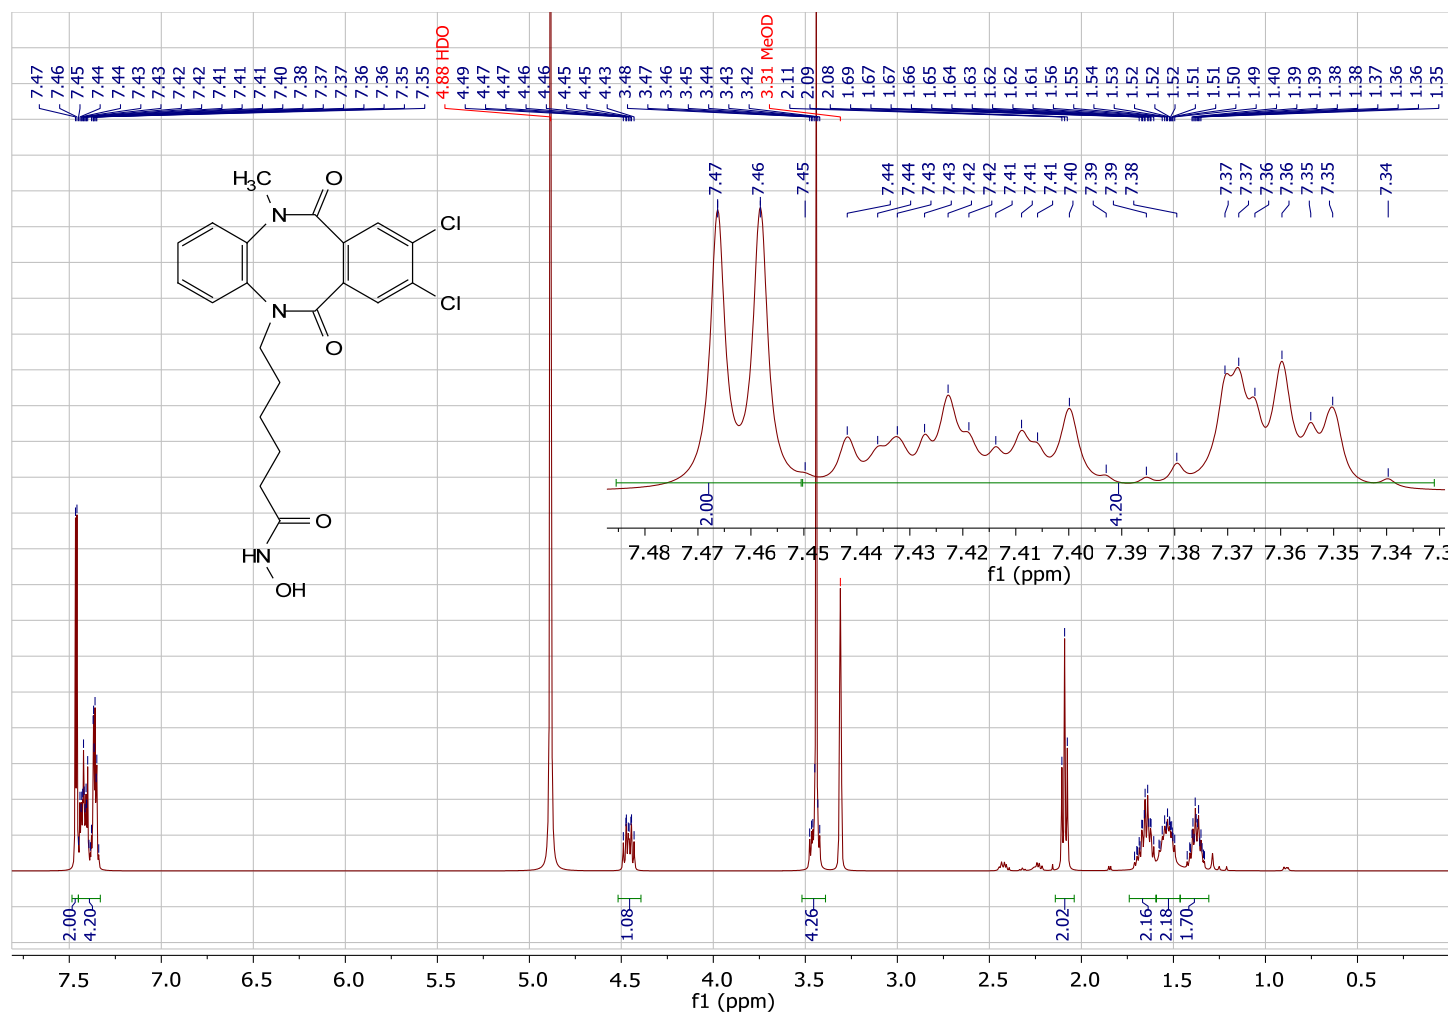

**Figure S33.** <sup>1</sup>H NMR spectrum of *N*-hydroxy-6-(8,9-dichloro-12-methyl-6,11-dioxo-11,12-dihydrodibenzo[*b,f*][1,4]diazocin-5(6*H*)-yl)hexanamide (**7n**).

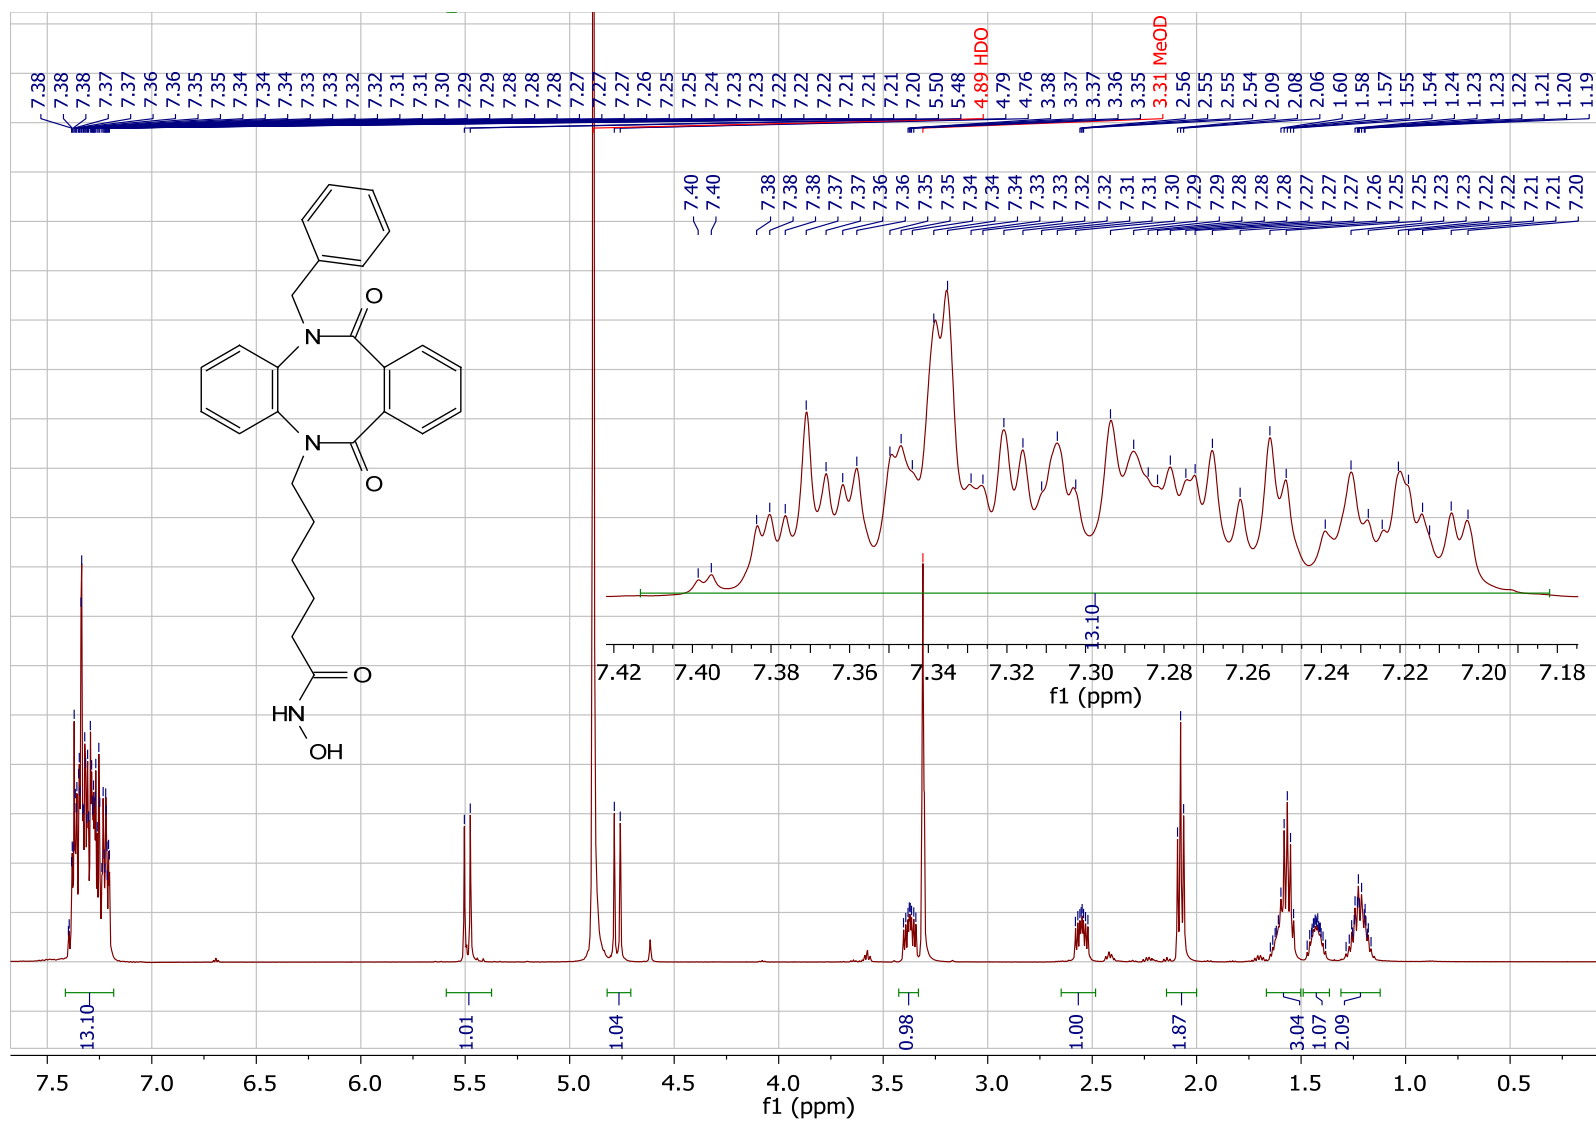

**Figure S34.** <sup>1</sup>H NMR spectrum of *N*-hydroxy-6-(12-benzyl-6,11-dioxo-11,12-dihydrodibenzo[*b,f*][1,4]diazocin-5(6*H*)-yl)hexanamide (**7o**).

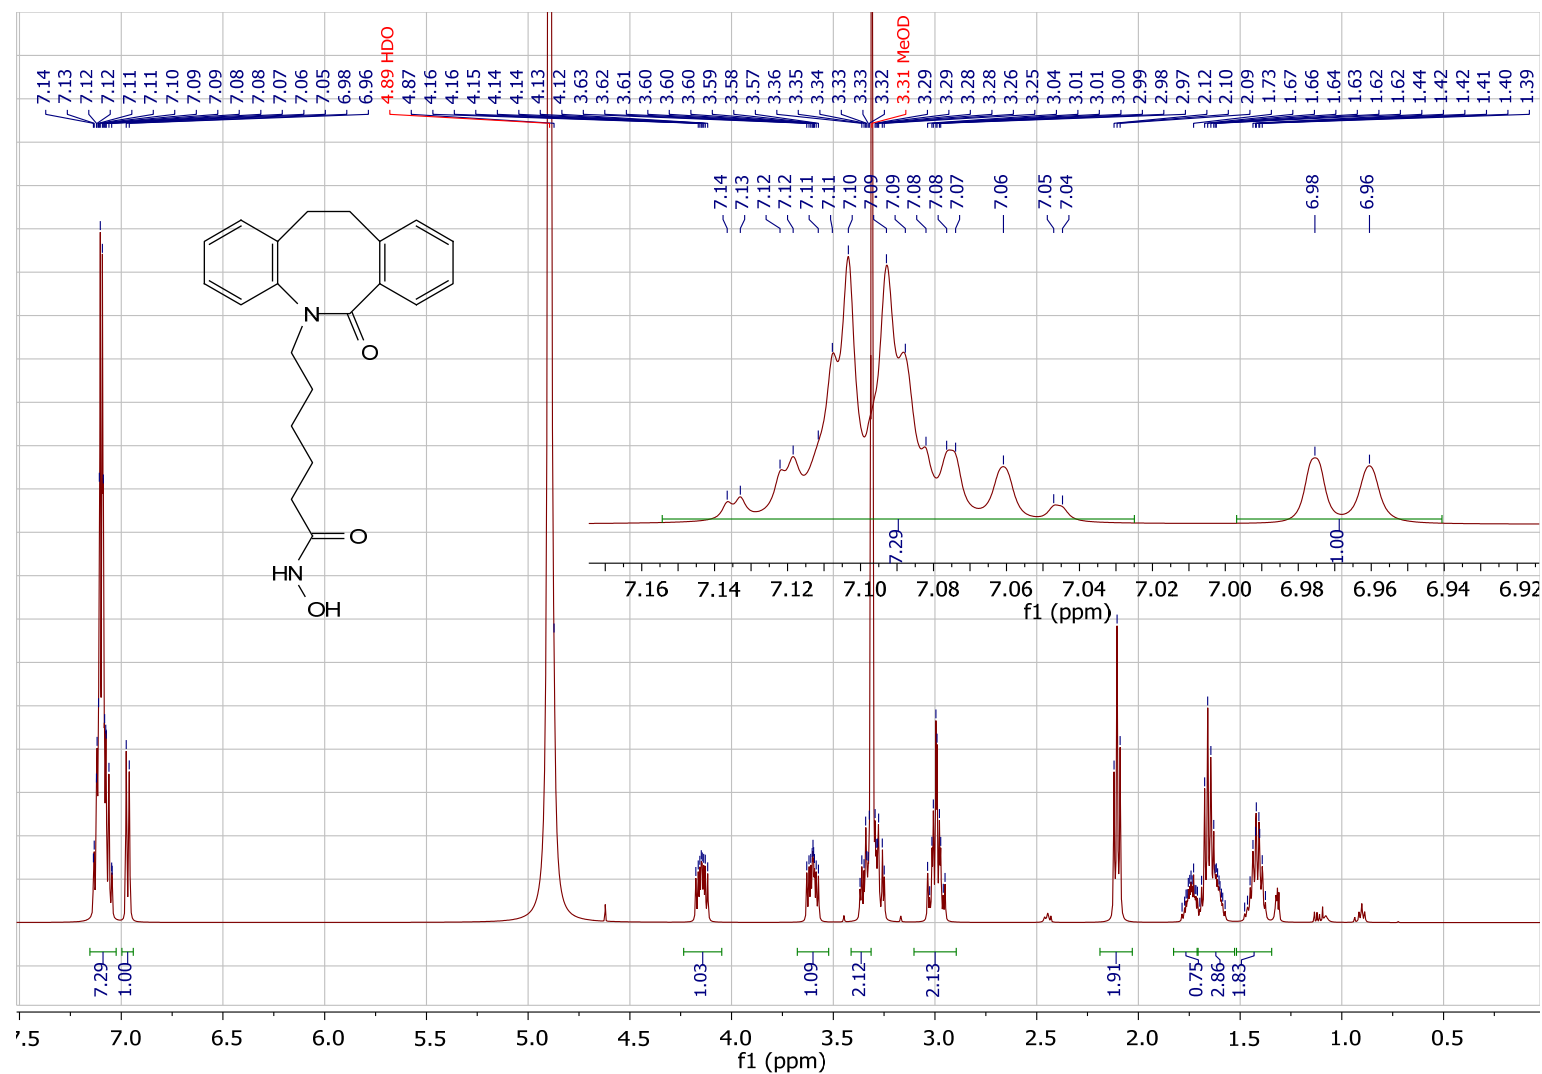

**Figure S35.** <sup>1</sup>H NMR spectrum of *N*-hydroxy-6-(6-oxo-11,12-dihydrodibenzo[*b,f*]azocin-5(6*H*)-yl)hexanamide (7p).

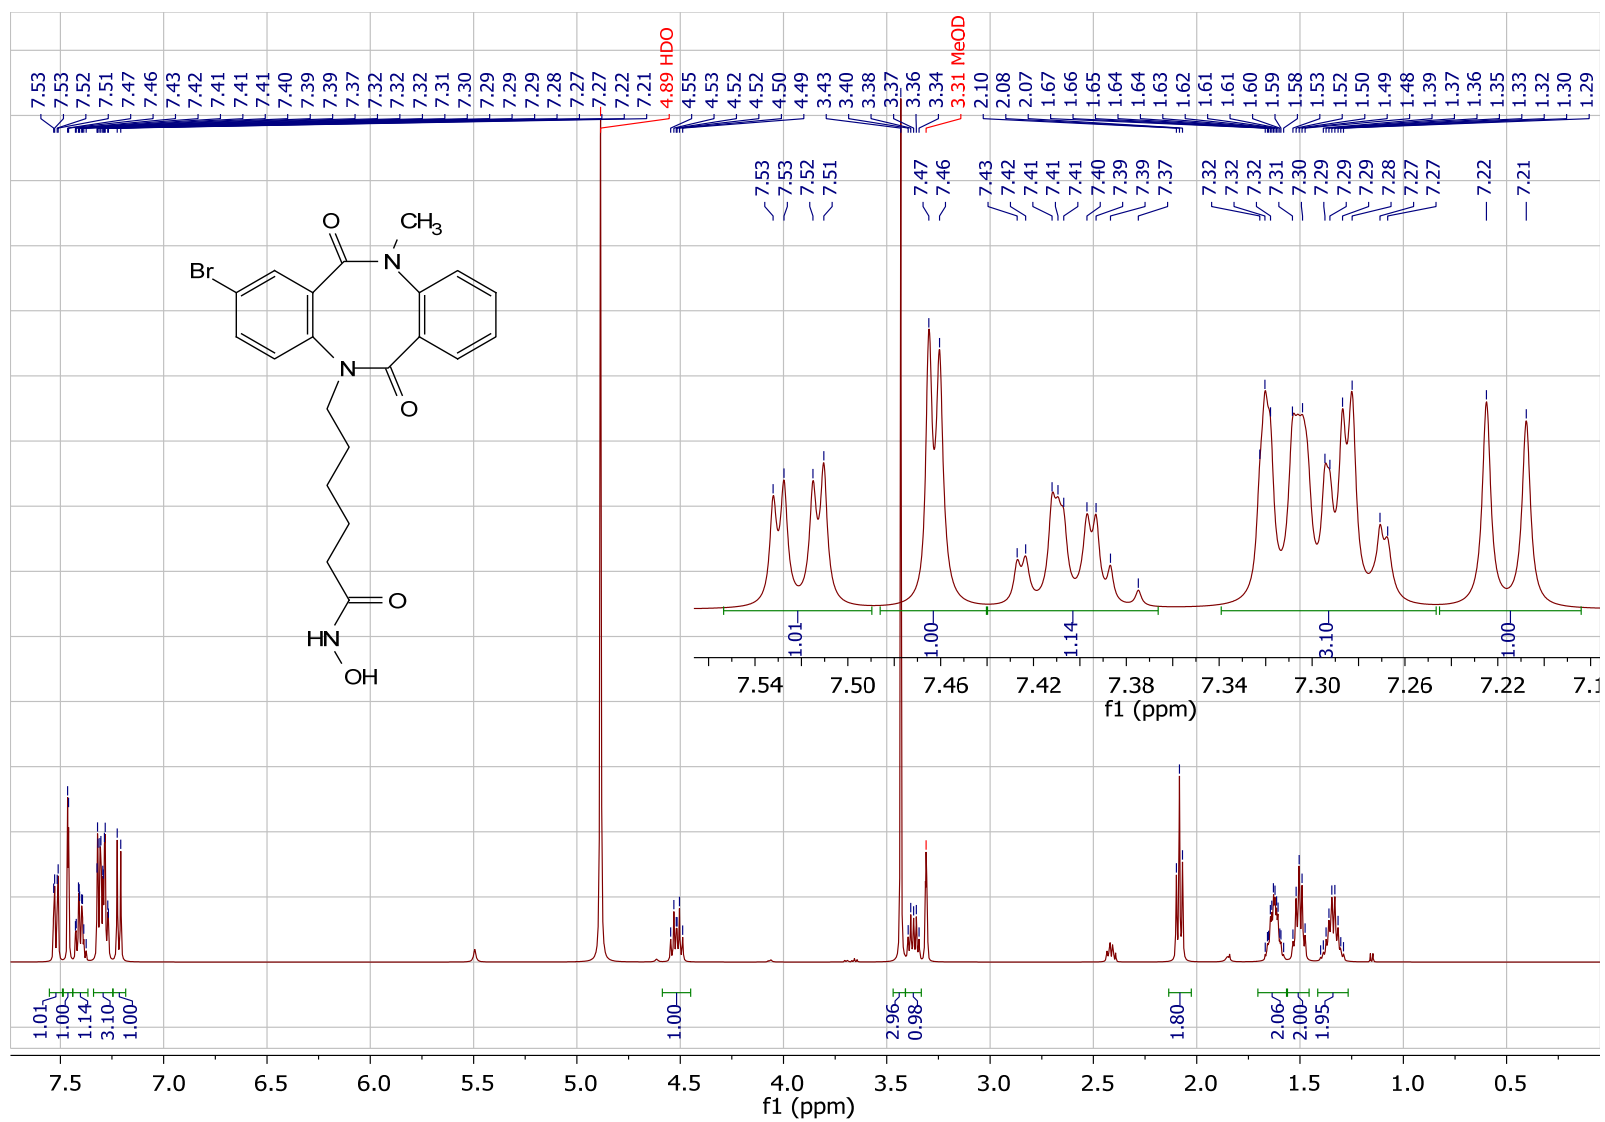

**Figure S36.** <sup>1</sup>H NMR spectrum of *N*-hydroxy-6-(2-bromo-11-methyl-6,12-dioxo-11,12-dihydrodibenzo[*b,f*][1,5]diazocin-5(6*H*)-yl)hexanamide (**7r**).

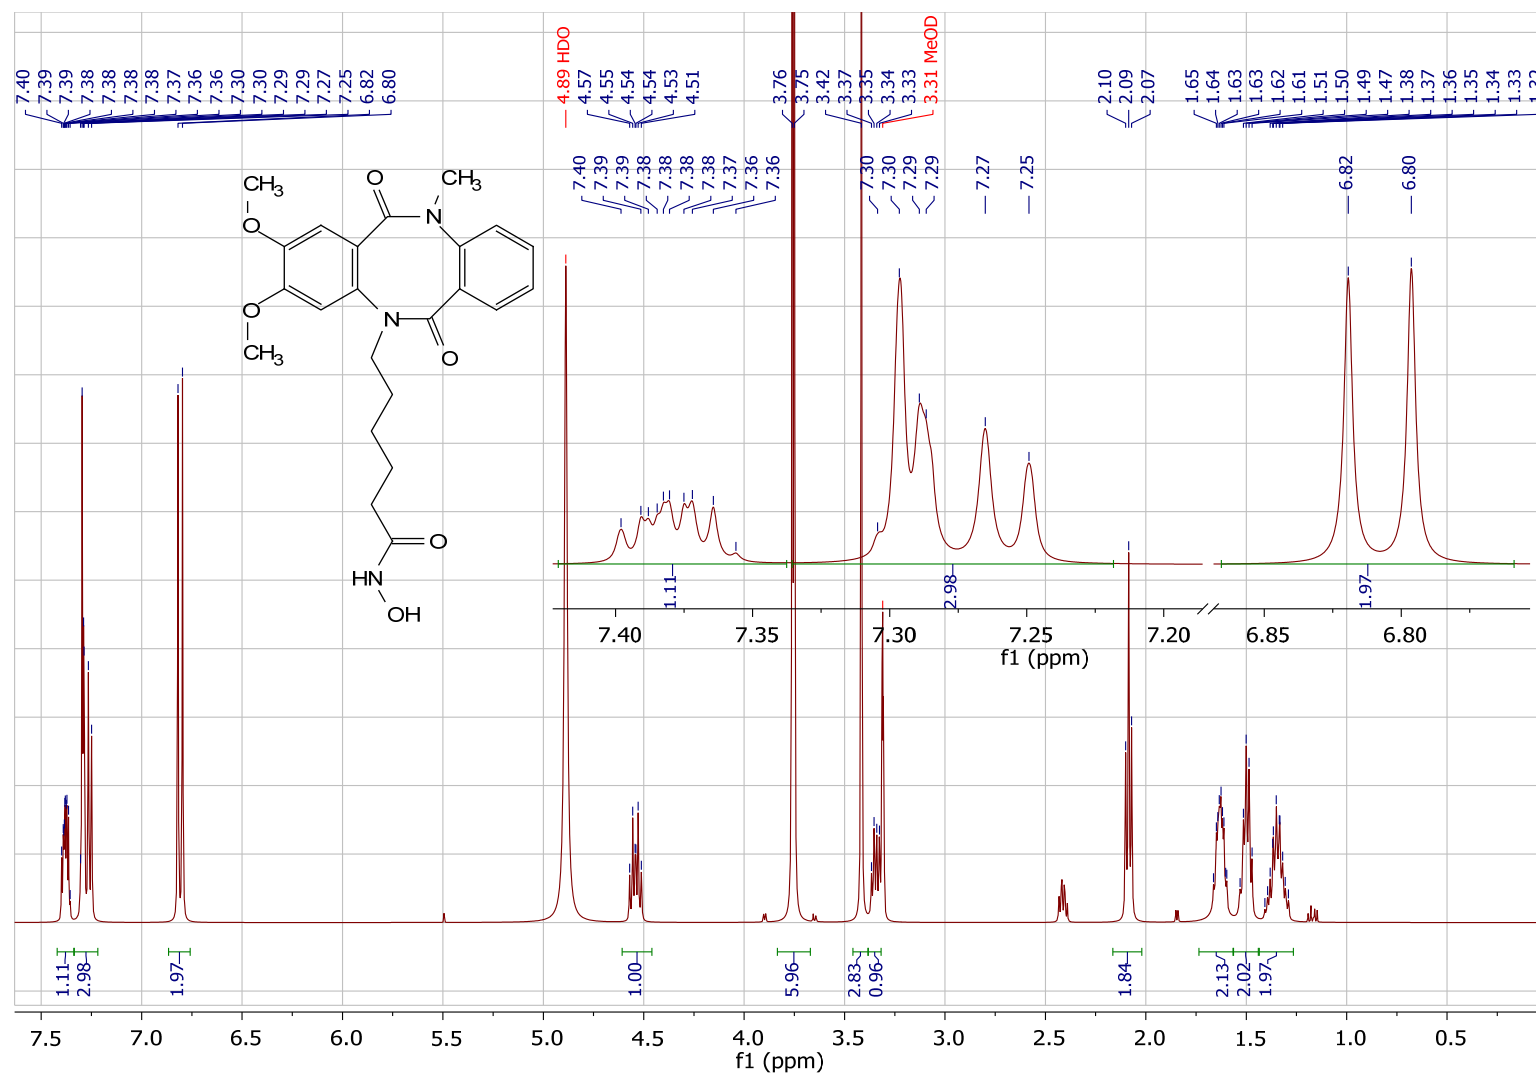

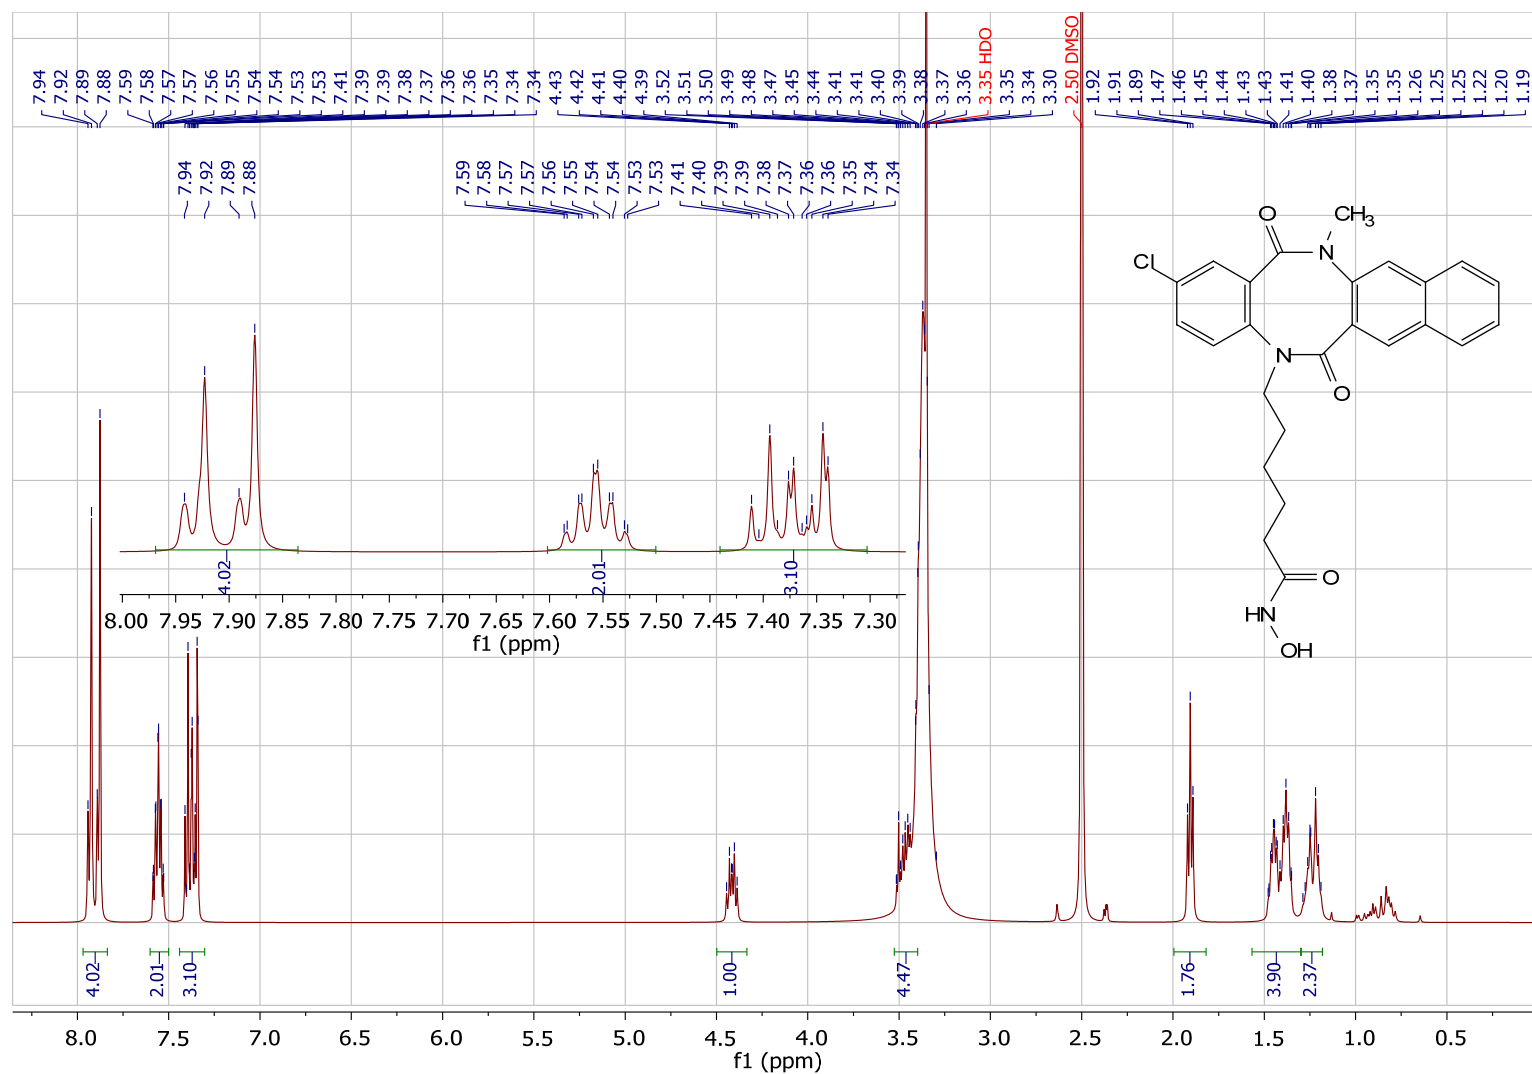

**Figure S38.**  $^1\text{H}$  NMR spectrum of *N*-hydroxy-6-(5-methyl-6,14-dioxo-5,14-dihydrobenzonaphtho[2,3-*f*][1,5]diazocin-13(6*H*)-yl)hexanamide (**7t**).

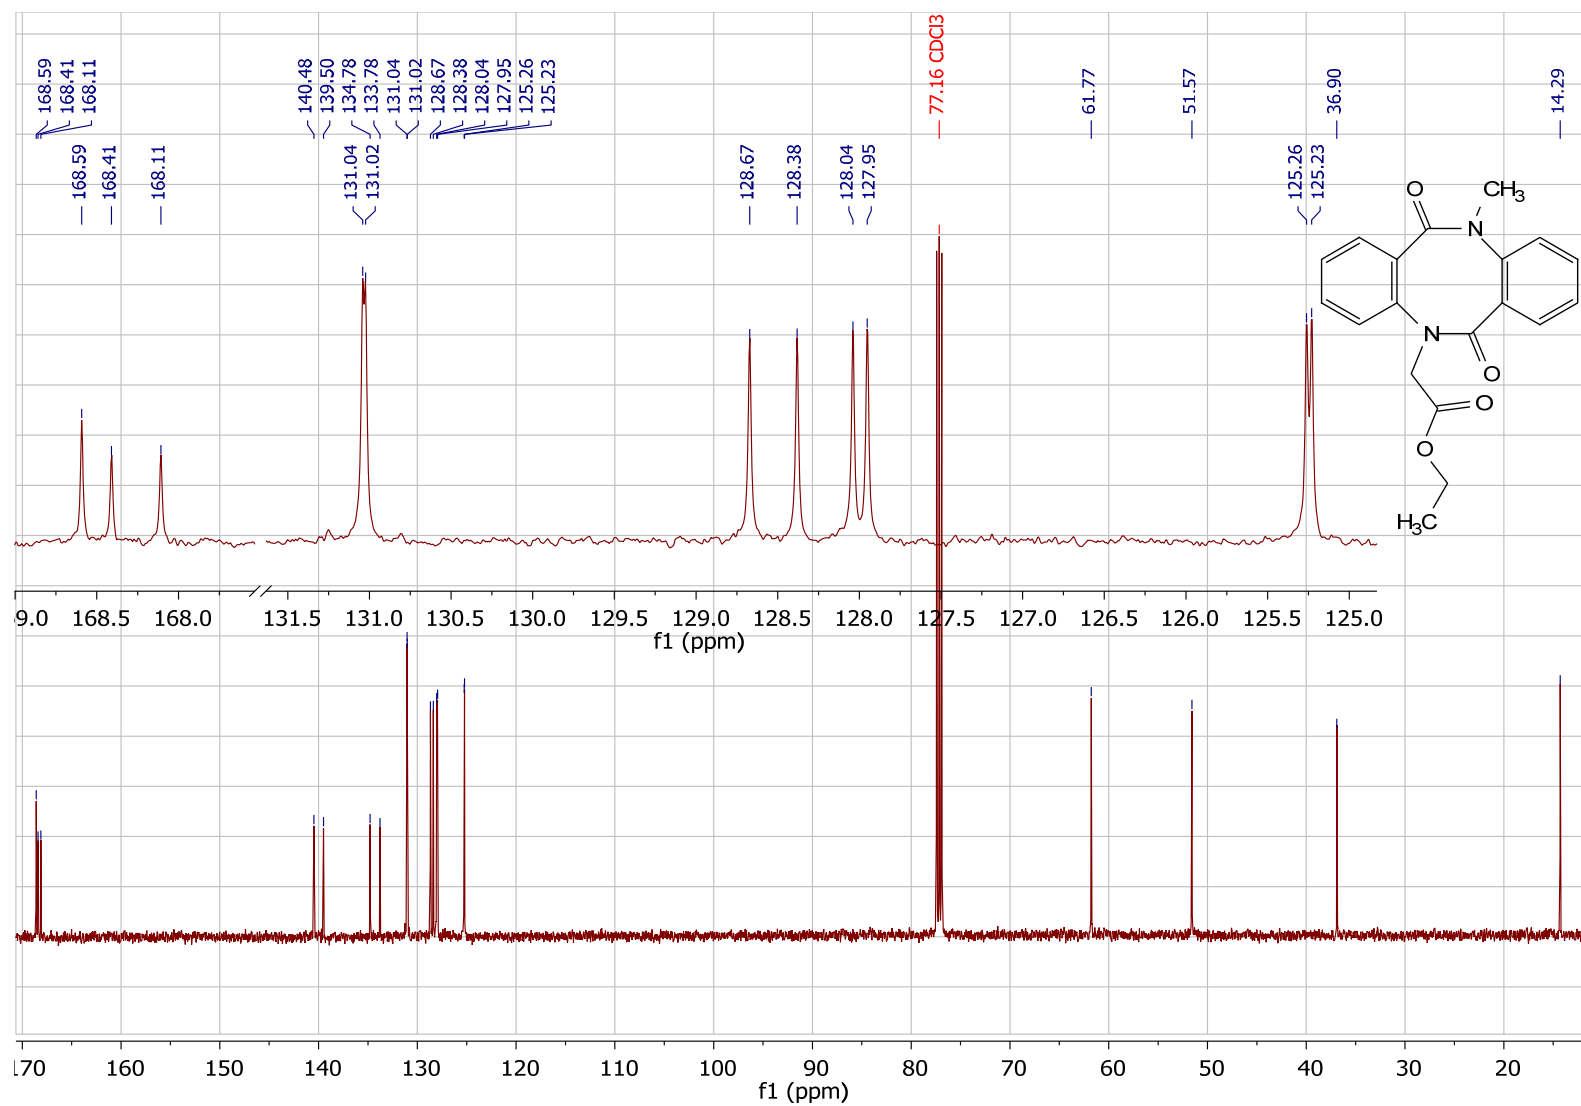

**Figure S39.** <sup>13</sup>C NMR spectrum of ethyl 2-(11-methyl-6,12-dioxo-11,12-dihydrodibenzo[*b,f*][1,5]diazocin-5(6*H*)-yl)acetate (10a).

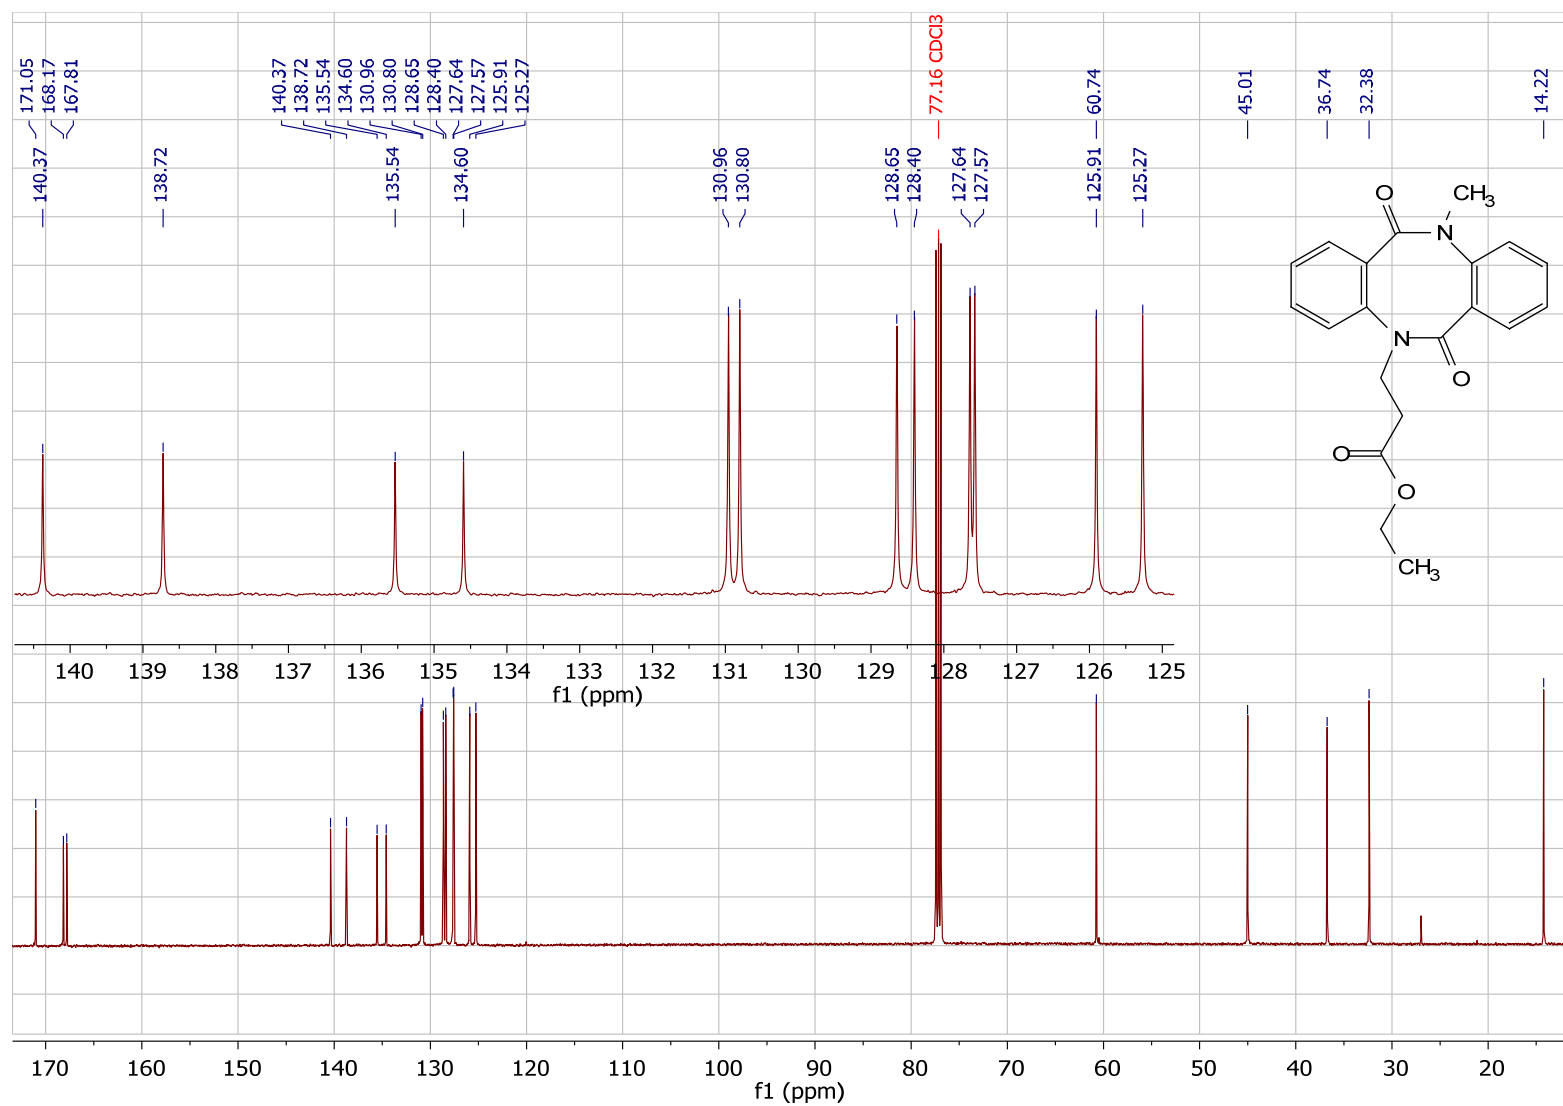

**Figure S40.** <sup>13</sup>C NMR spectrum of ethyl 3-(11-methyl-6,12-dioxo-11,12-dihydrodibenzo[*b,f*][1,5]diazocin-5(6*H*)-yl)propanoate (**10b**).

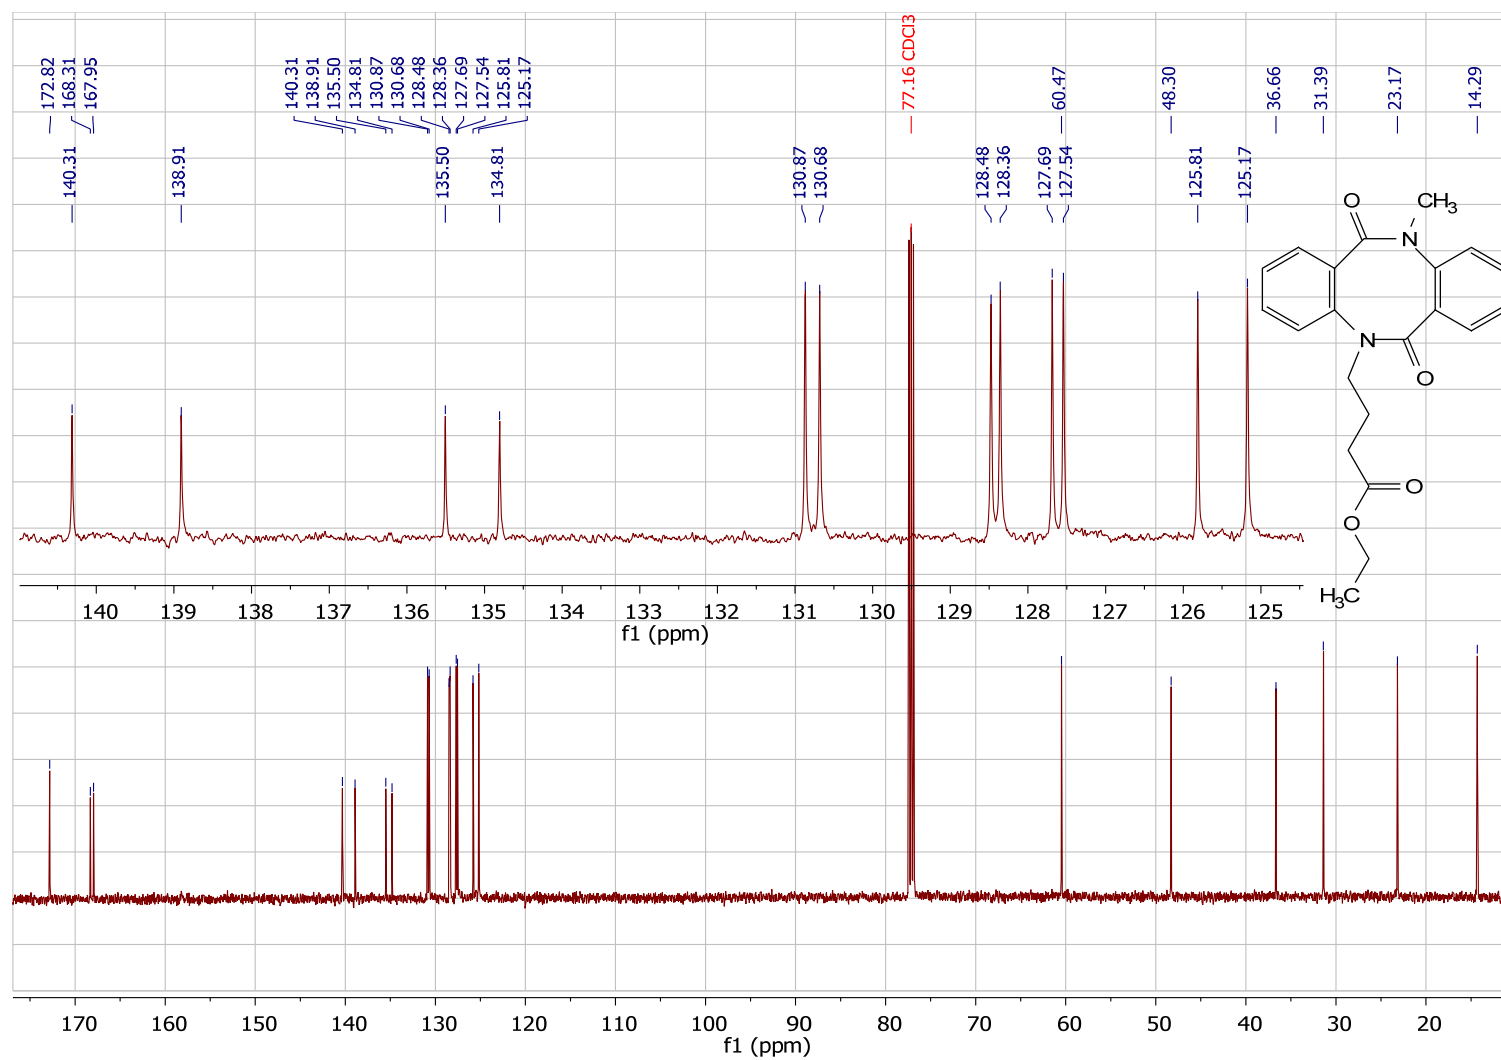

**Figure S41.** <sup>13</sup>C NMR spectrum of ethyl 4-(11-methyl-6,12-dioxo-11,12-dihydrodibenzo[*b,f*][1,5]diazocin-5(6*H*)-yl)butanoate (**10c**).

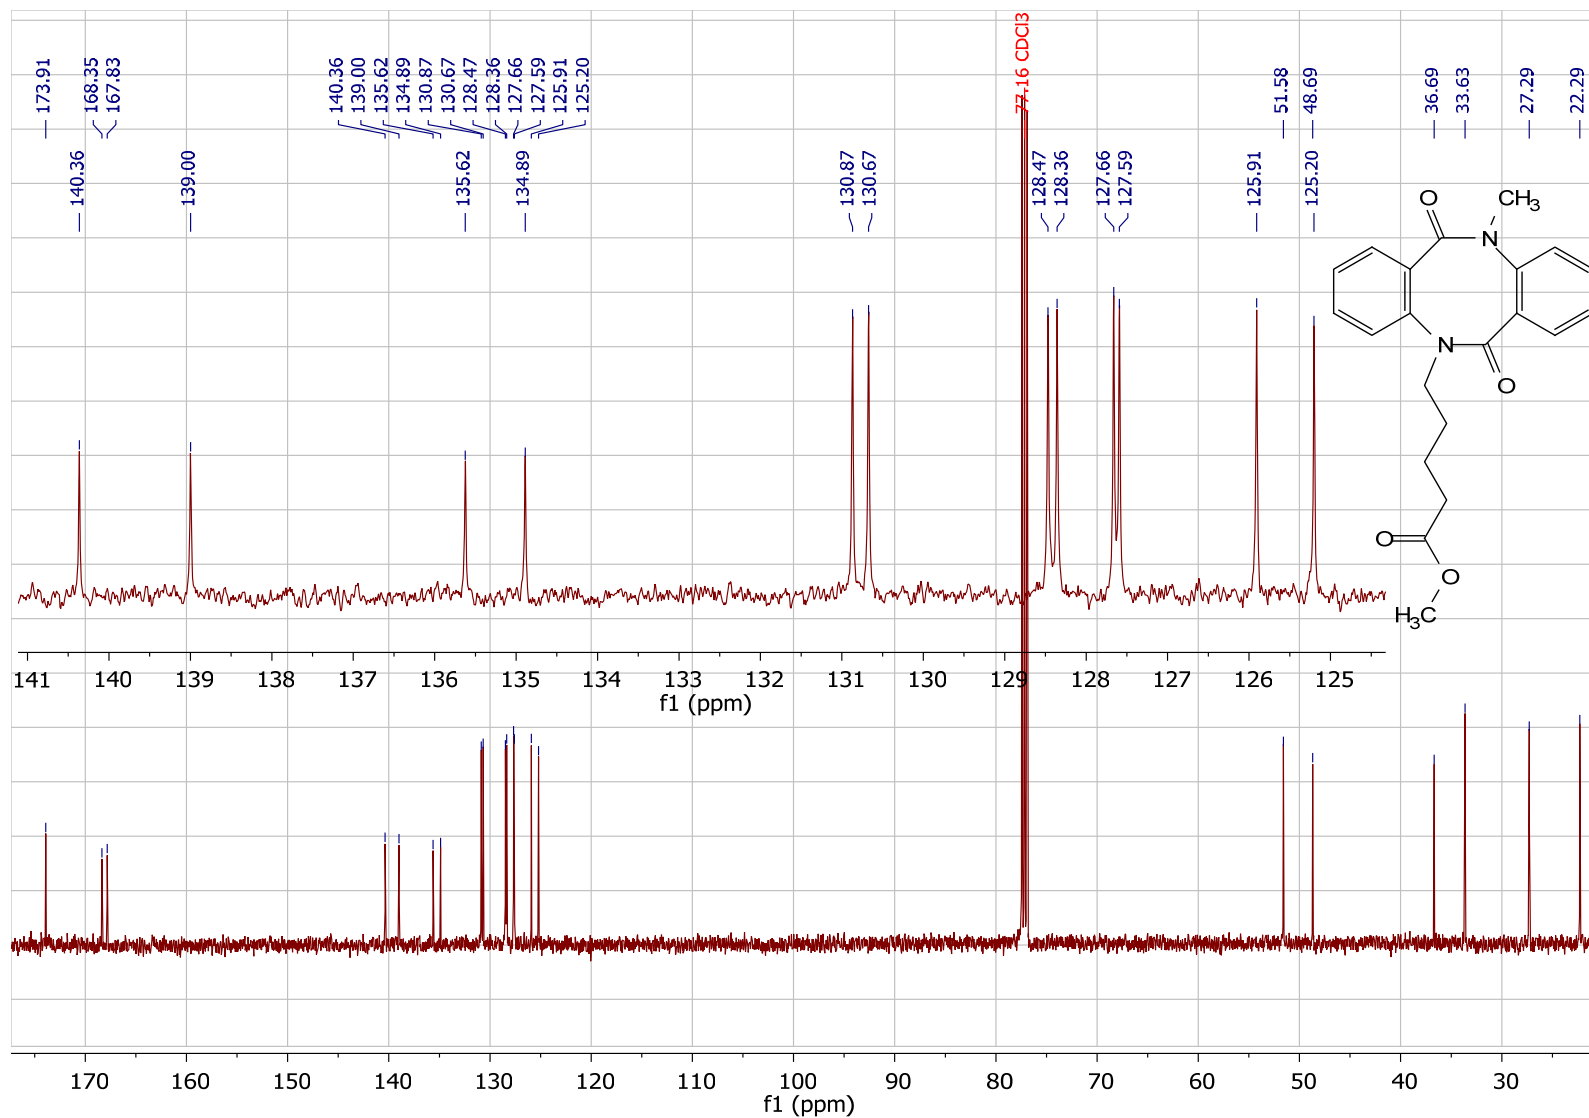

**Figure S42.**  $^{13}\text{C}$  NMR spectrum of methyl 5-(11-methyl-6,12-dioxo-11,12-dihydrodibenzo[*b,f*][1,5]diazocin-5(6*H*)-yl)pentanoate (10d).

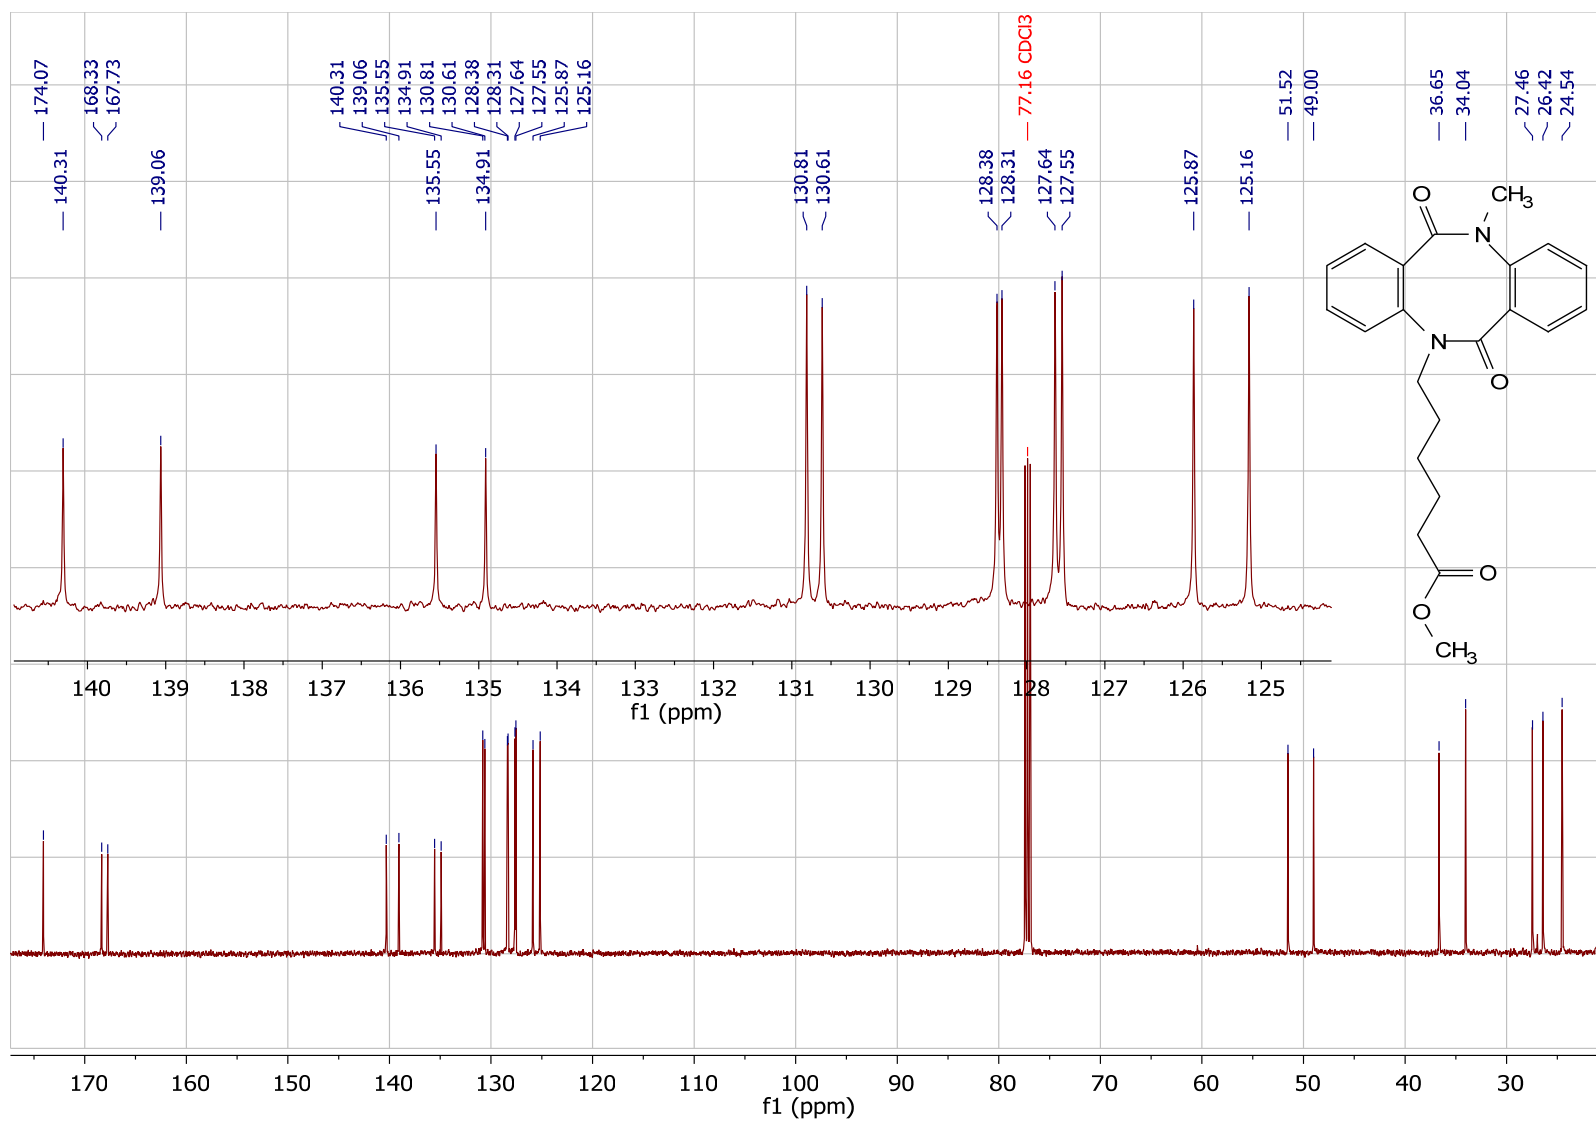

**Figure S43.** <sup>13</sup>C NMR spectrum of methyl 6-(11-methyl-6,12-dioxo-11,12-dihydrodibenzo[*b,f*][1,5]diazocin-5(6*H*)-yl)hexanoate (10e).

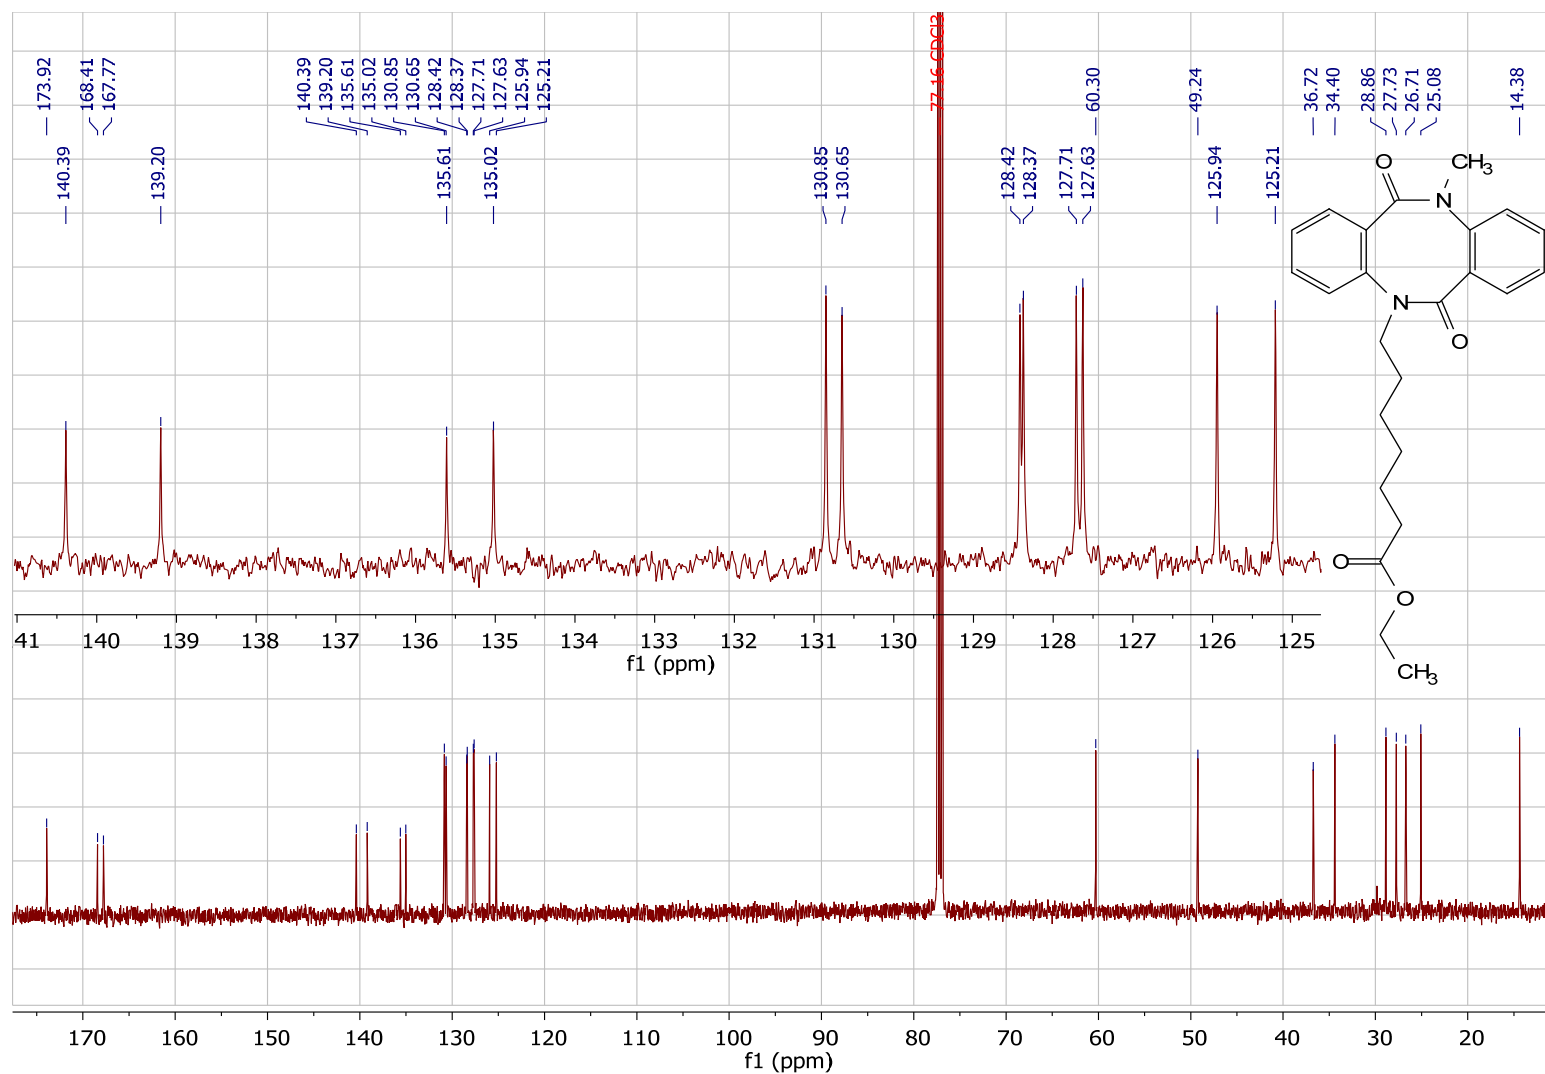

**Figure S44.** <sup>13</sup>C NMR spectrum of ethyl 7-(11-methyl-6,12-dioxo-11,12-dihydrodibenzo[*b,f*][1,5]diazocin-5(6*H*)-yl)heptanoate (**10f**).

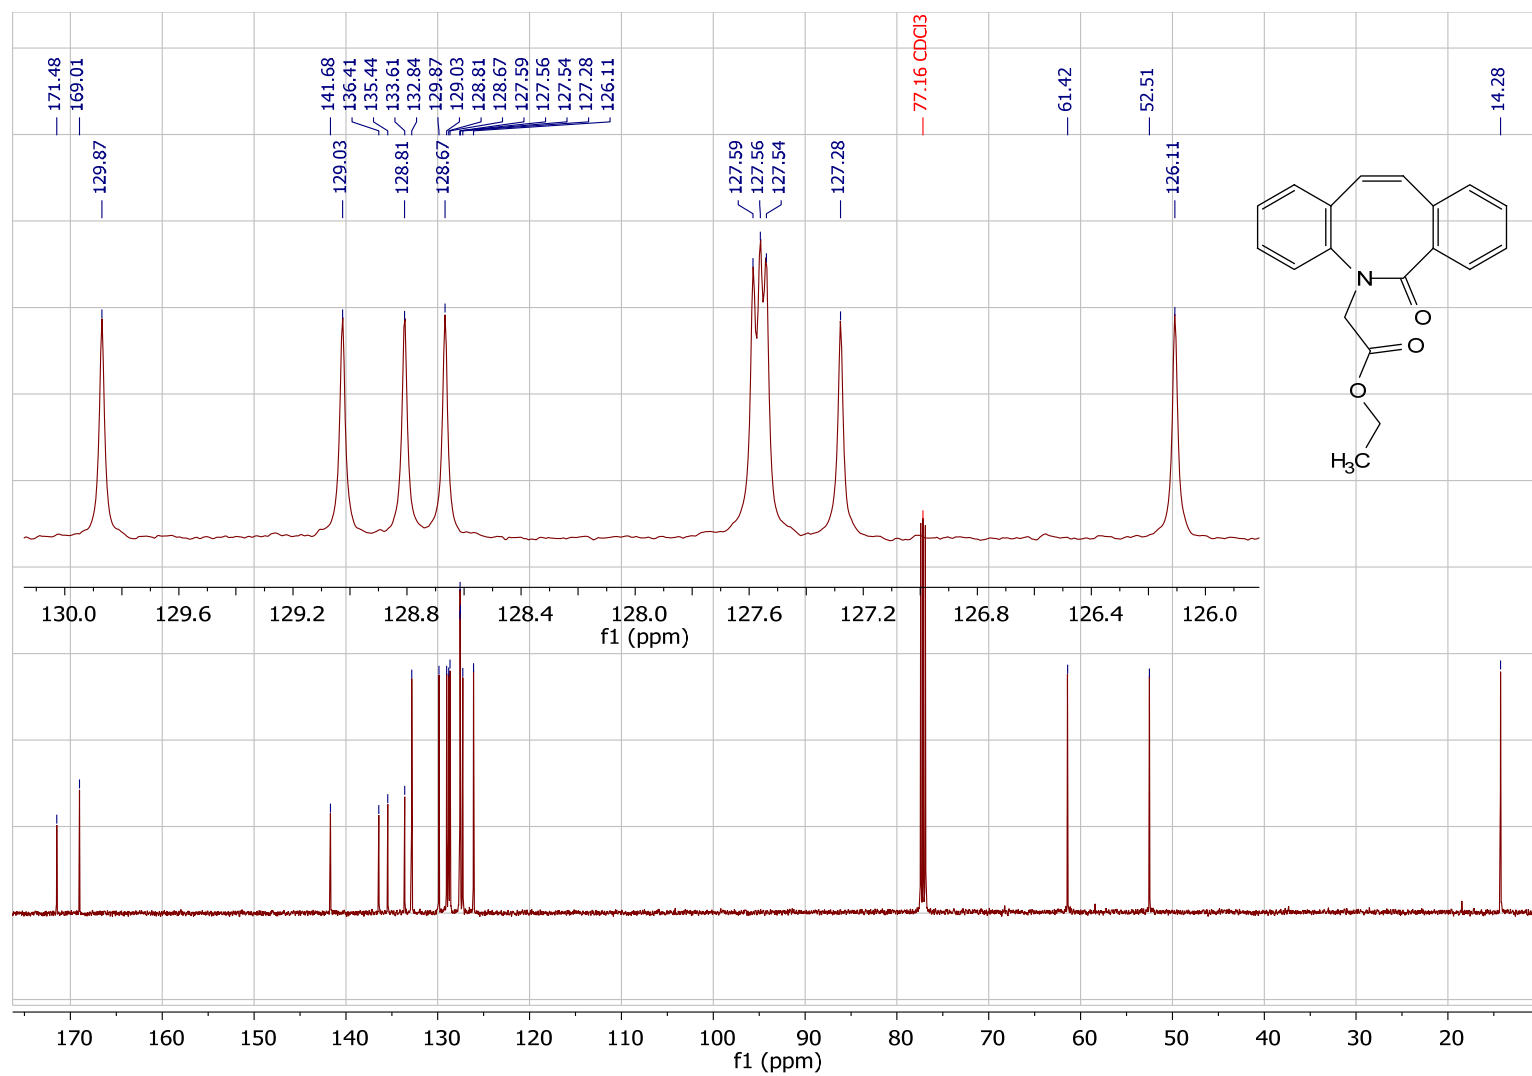

**Figure S45.**  $^{13}\text{C}$  NMR spectrum of ethyl 2-(6-oxodibenzo[*b,f*]azocin-5(6*H*)-yl)acetate (10g).

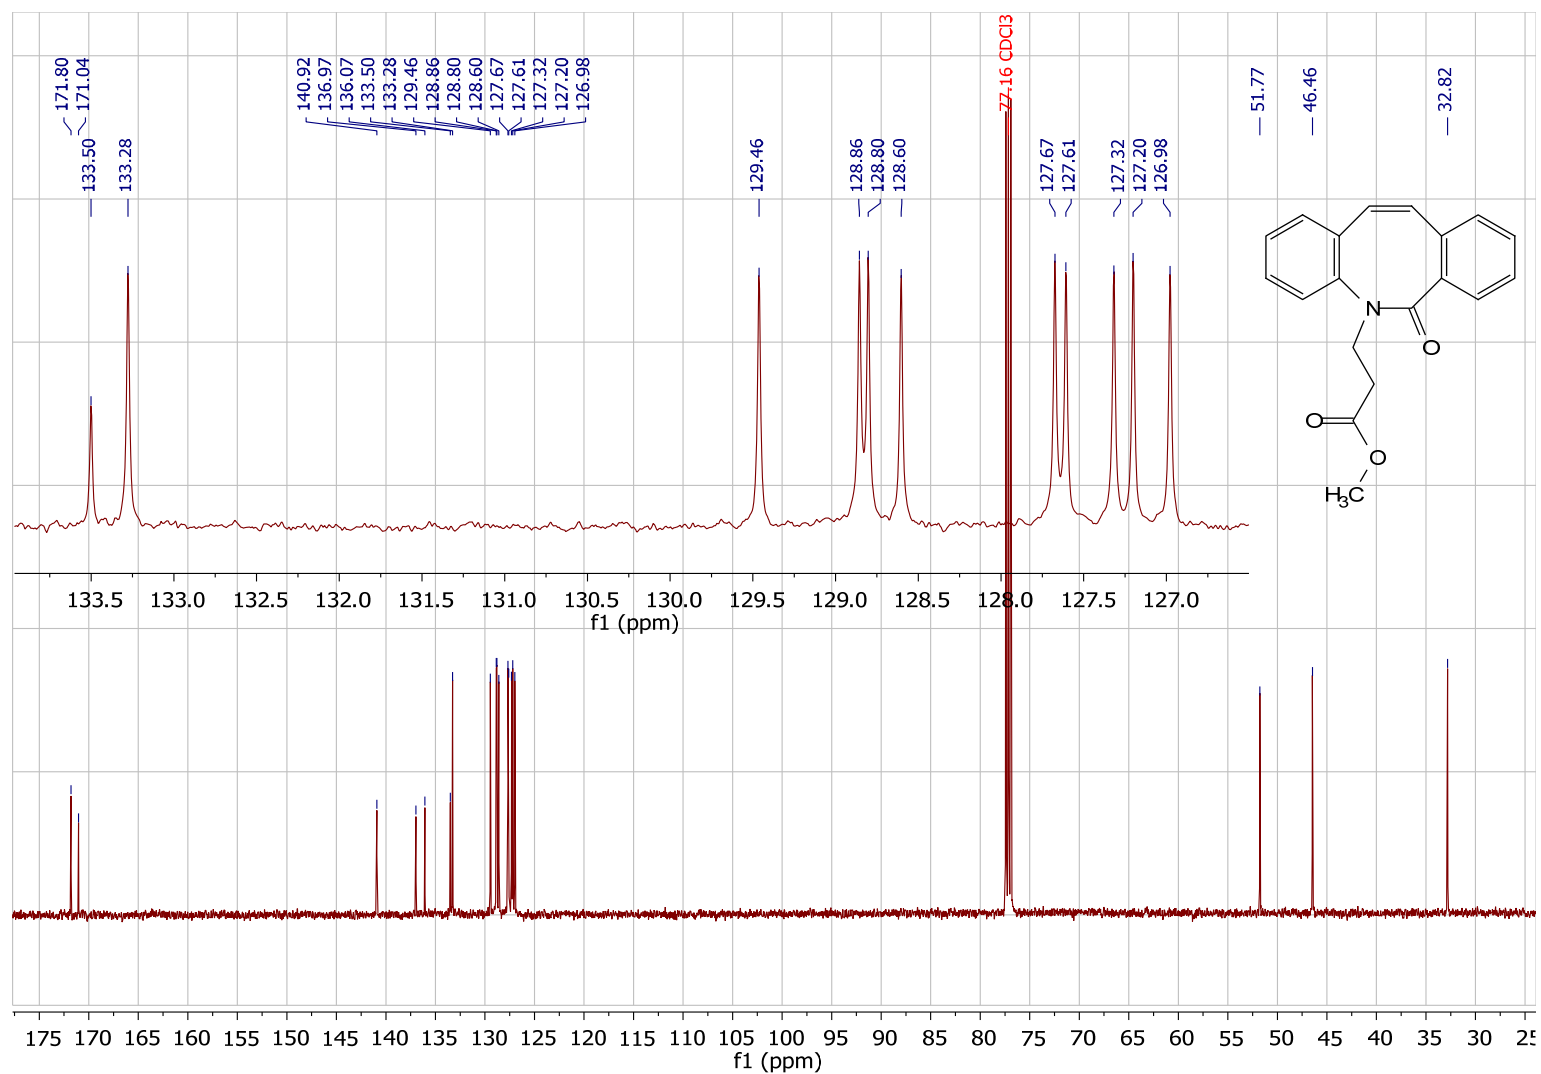

**Figure S46.**  $^{13}\text{C}$  NMR spectrum of methyl 3-(6-oxodibenzo[*b,f*]azocin-5(6*H*)-yl)propanoate (**10h**).

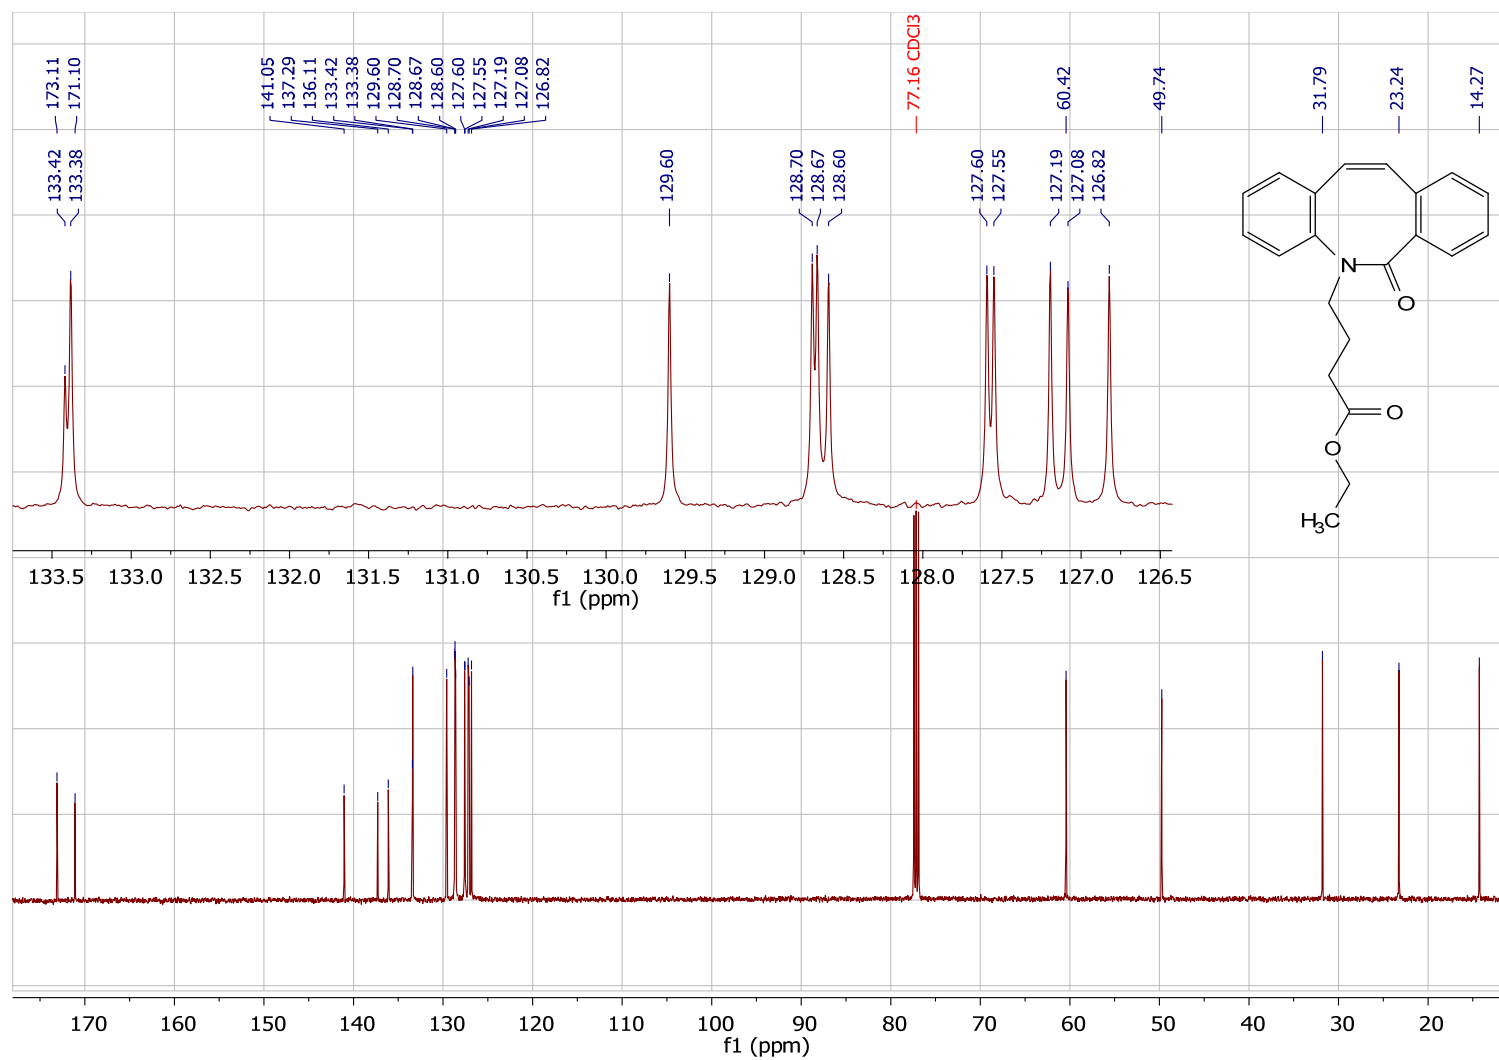

**Figure S47.**  $^{13}\text{C}$  NMR spectrum of ethyl 4-(6-oxodibenzo[*b,f*]azocin-5(6*H*)-yl)butanoate (**10i**).

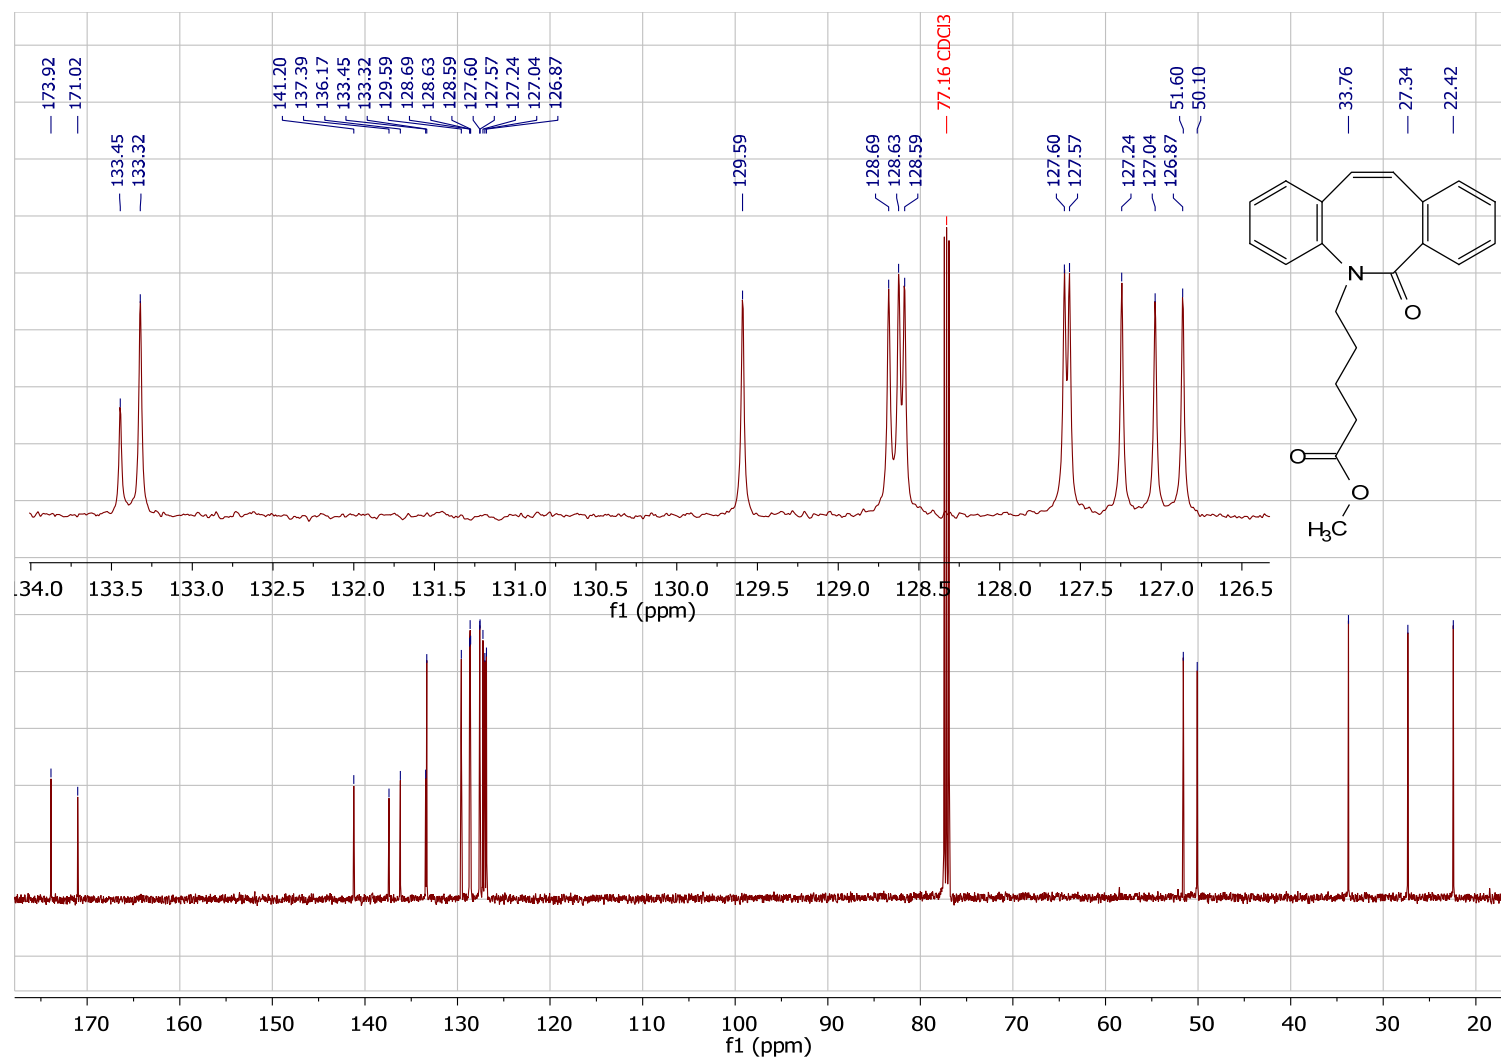

**Figure S48.** <sup>13</sup>C NMR spectrum of methyl 5-(6-oxodibenzo[*b,f*]azocin-5(6*H*)-yl)pentanoate (**10j**).

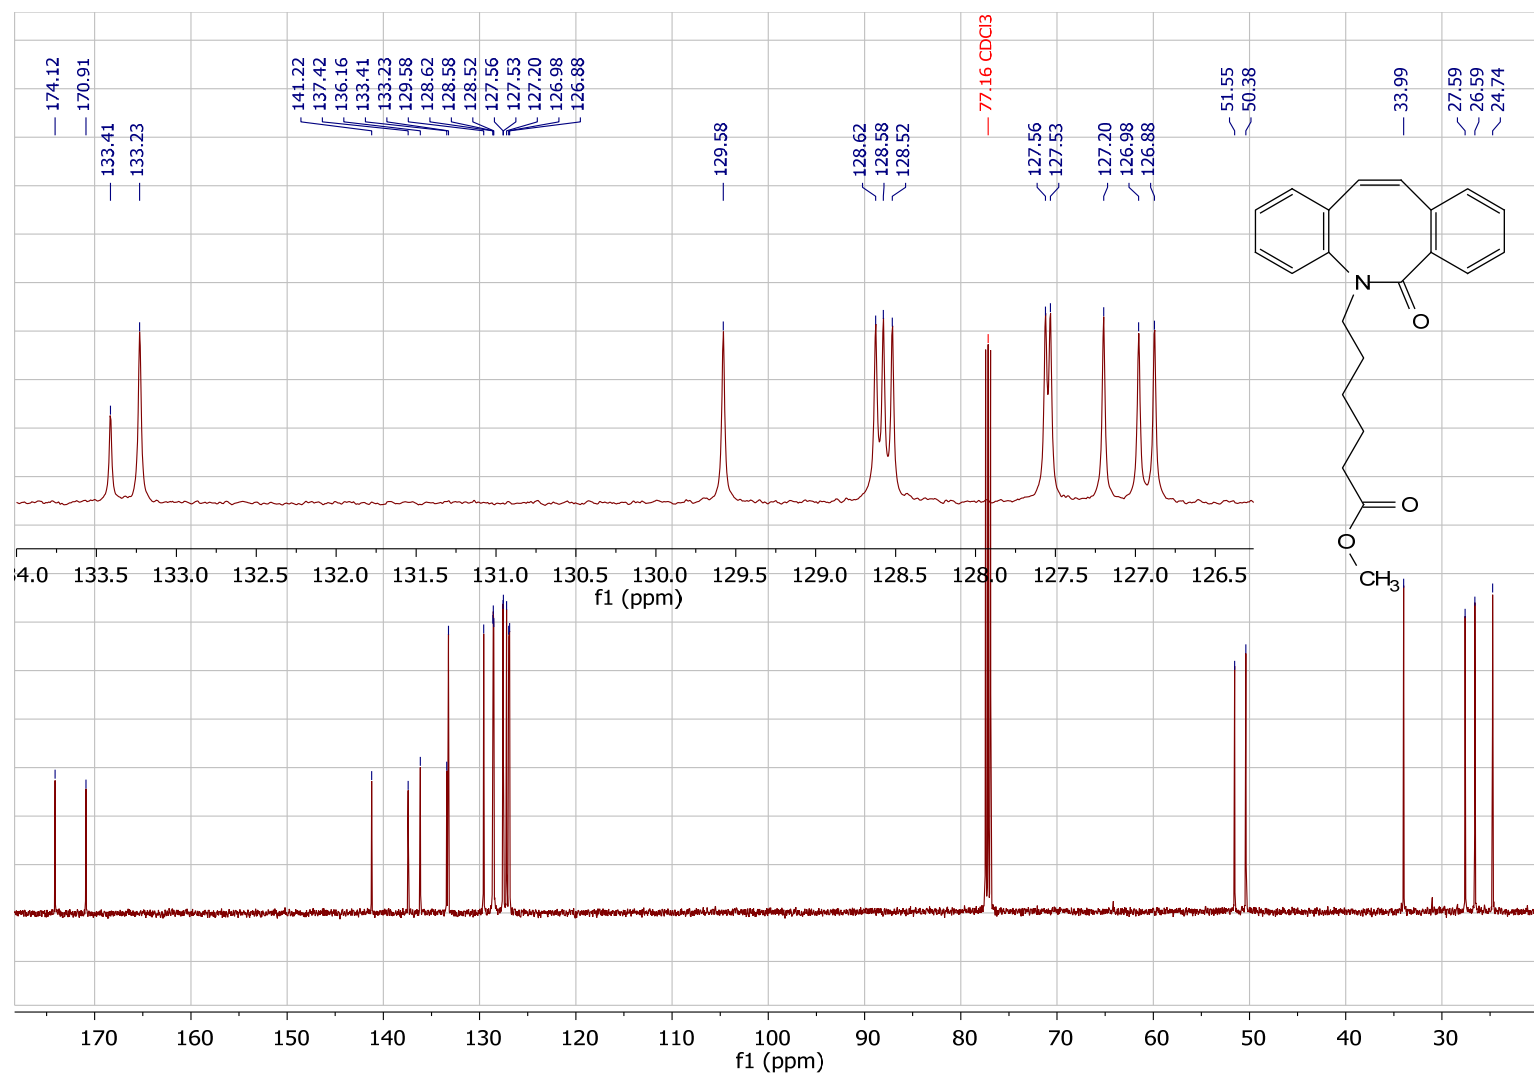

Figure S49. <sup>13</sup>C NMR spectrum of methyl 6-(6-oxodibenzo[*b,f*]azocin-5(6*H*)-yl)hexanoate (10k).

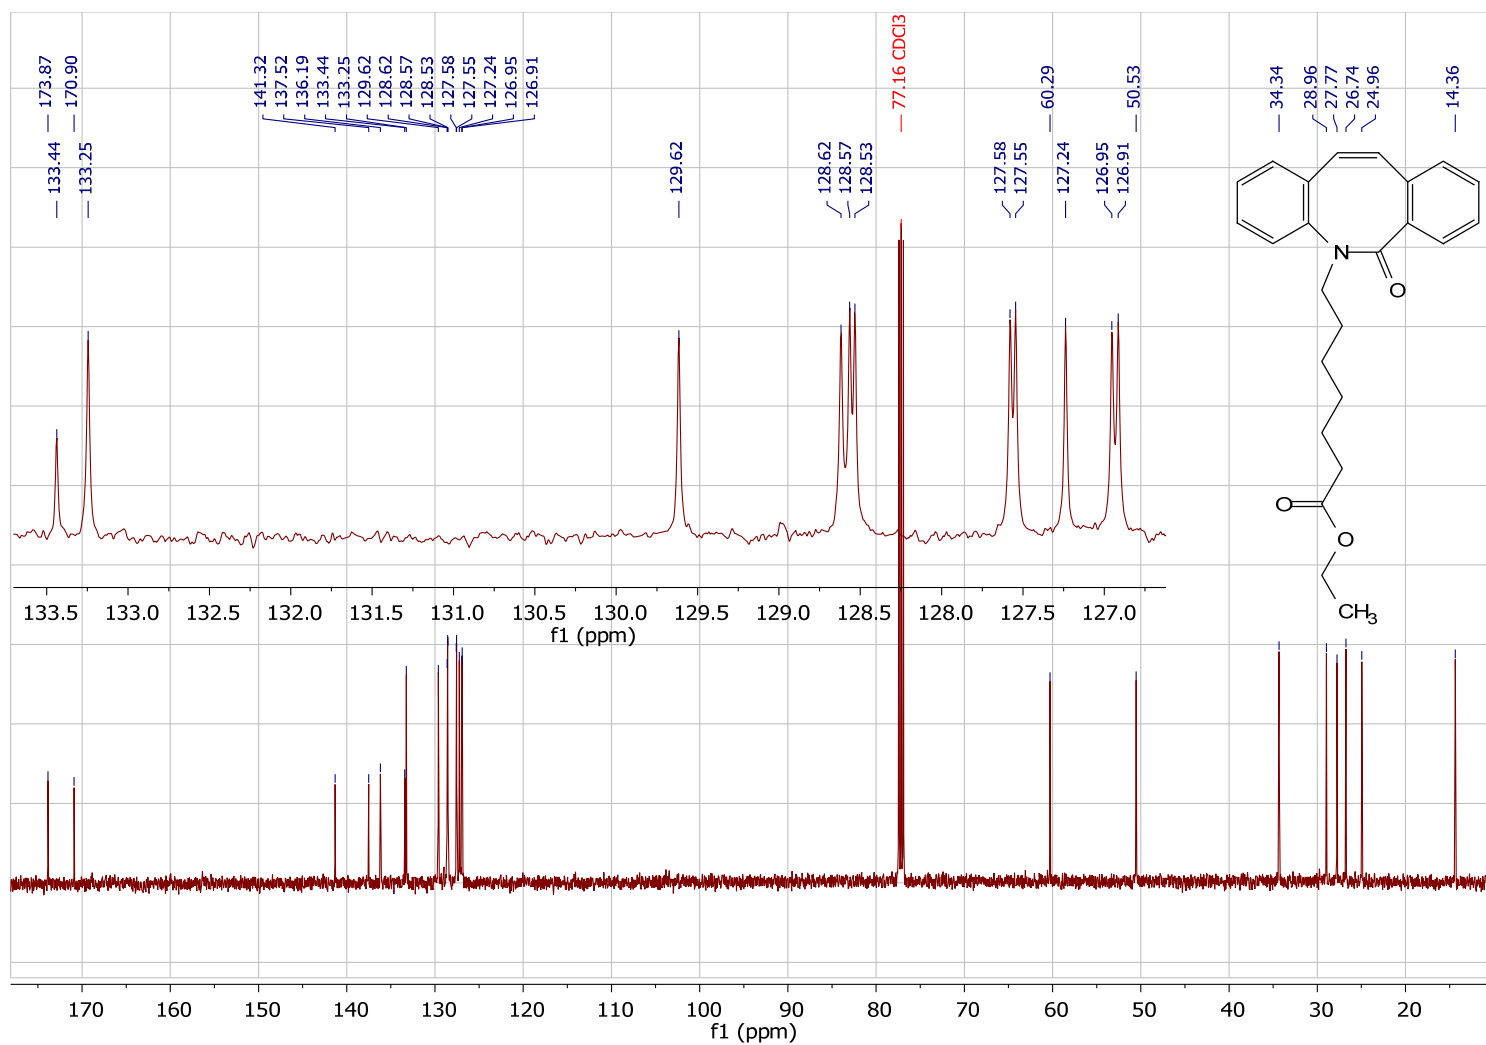

**Figure S50.**  $^{13}\text{C}$  NMR spectrum of ethyl 7-(6-oxodibenzo[*b,f*]azocin-5(6*H*)-yl)heptanoate (101).

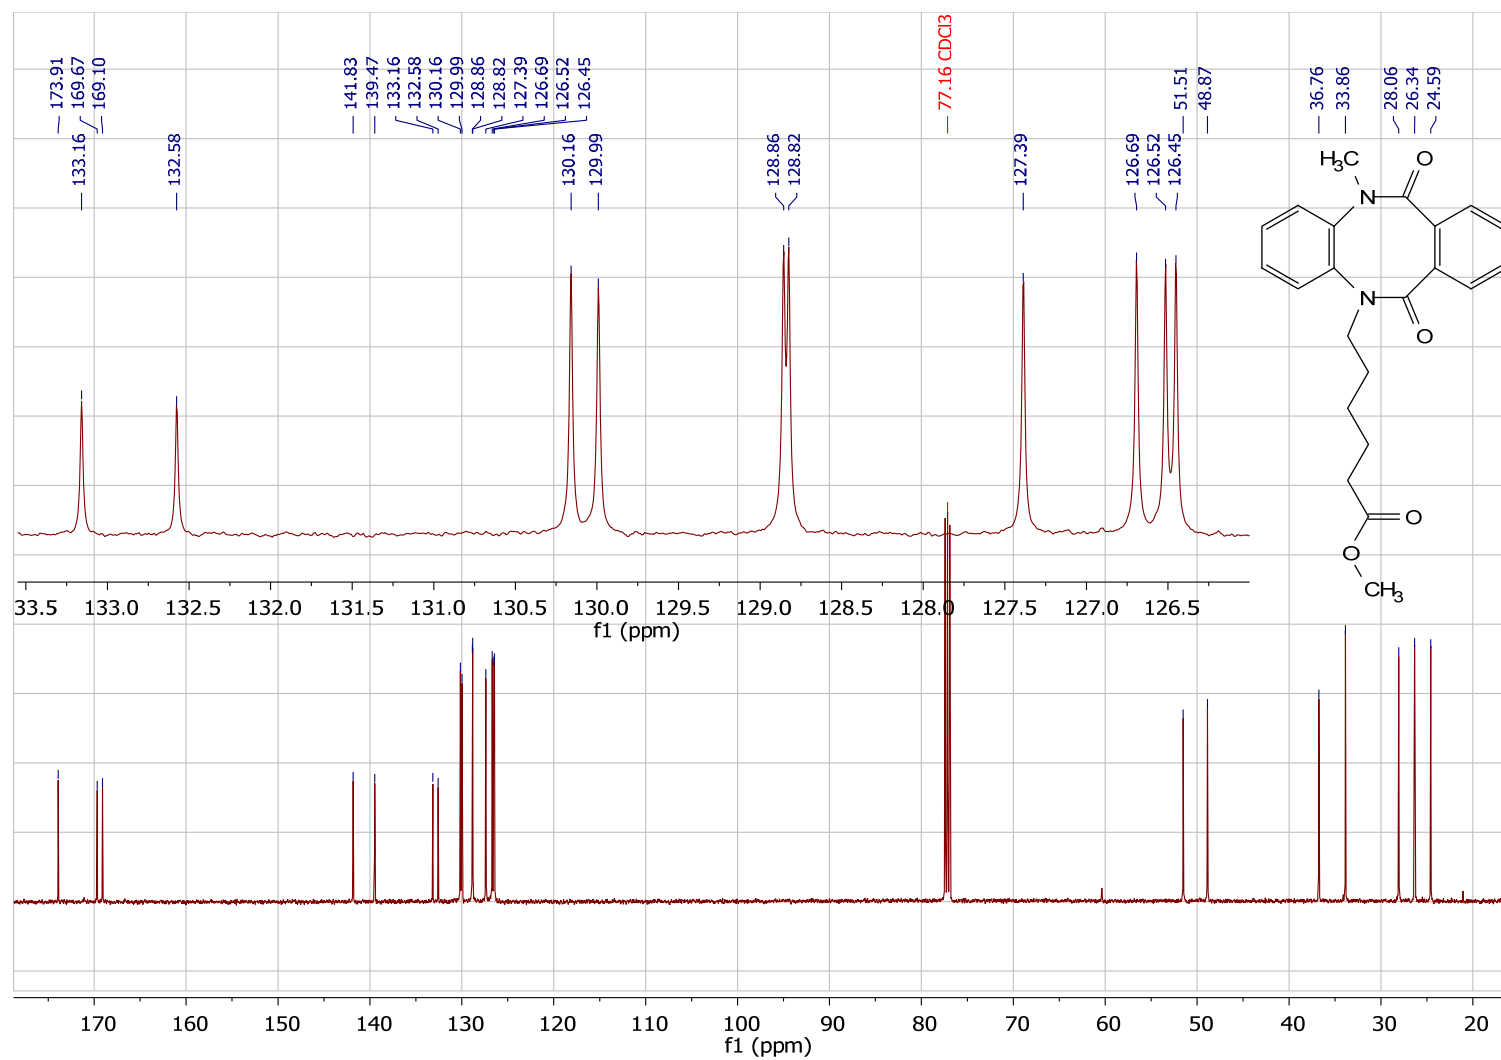

**Figure S51.** <sup>13</sup>C NMR spectrum of methyl 6-(12-methyl-6,11-dioxo-11,12-dihydrodibenzo[*b,f*][1,4]diazocin-5(6*H*)-yl)hexanoate (**10m**).

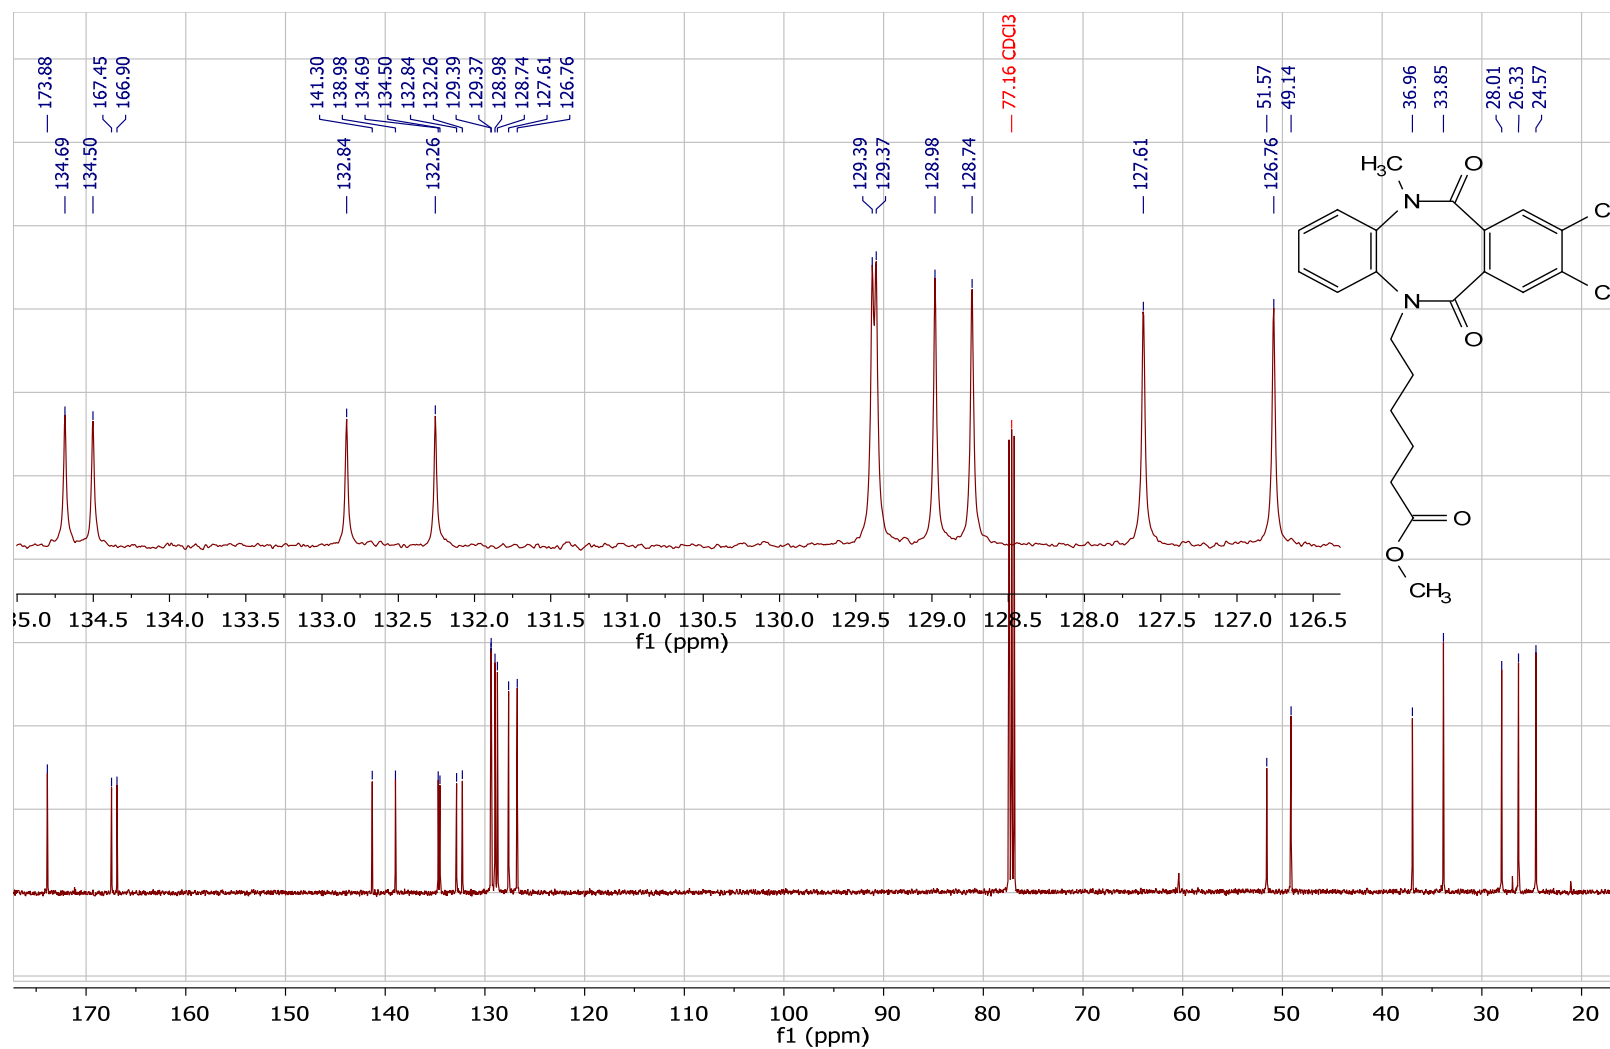

**Figure S52.**  $^{13}\text{C}$  NMR spectrum of methyl 6-(8,9-dichloro-12-methyl-6,11-dioxo-11,12-dihydrodibenzo[*b,f*][1,4]diazocin-5(6*H*)-yl) hexanoate (**10n**).

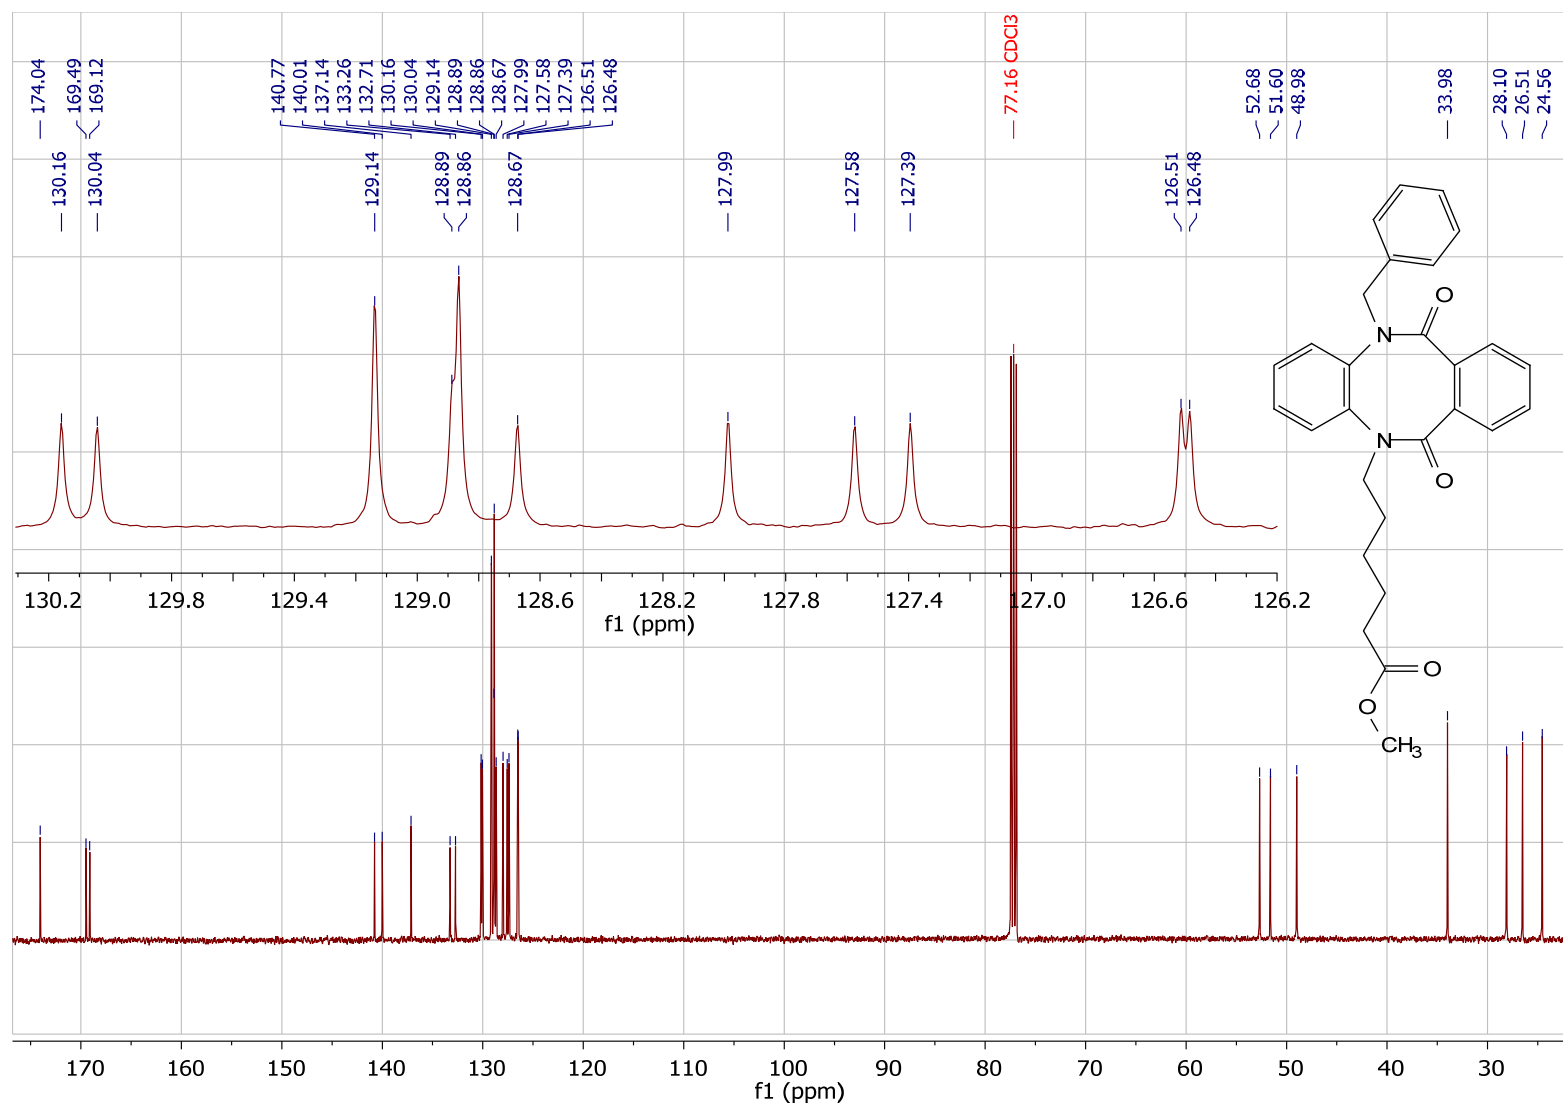

**Figure S53.** <sup>13</sup>C NMR spectrum of methyl 6-(12-benzyl-6,11-dioxo-11,12-dihydrodibenzo[*b,f*][1,4]diazocin-5(6*H*)-yl)hexanoate (**10o**).

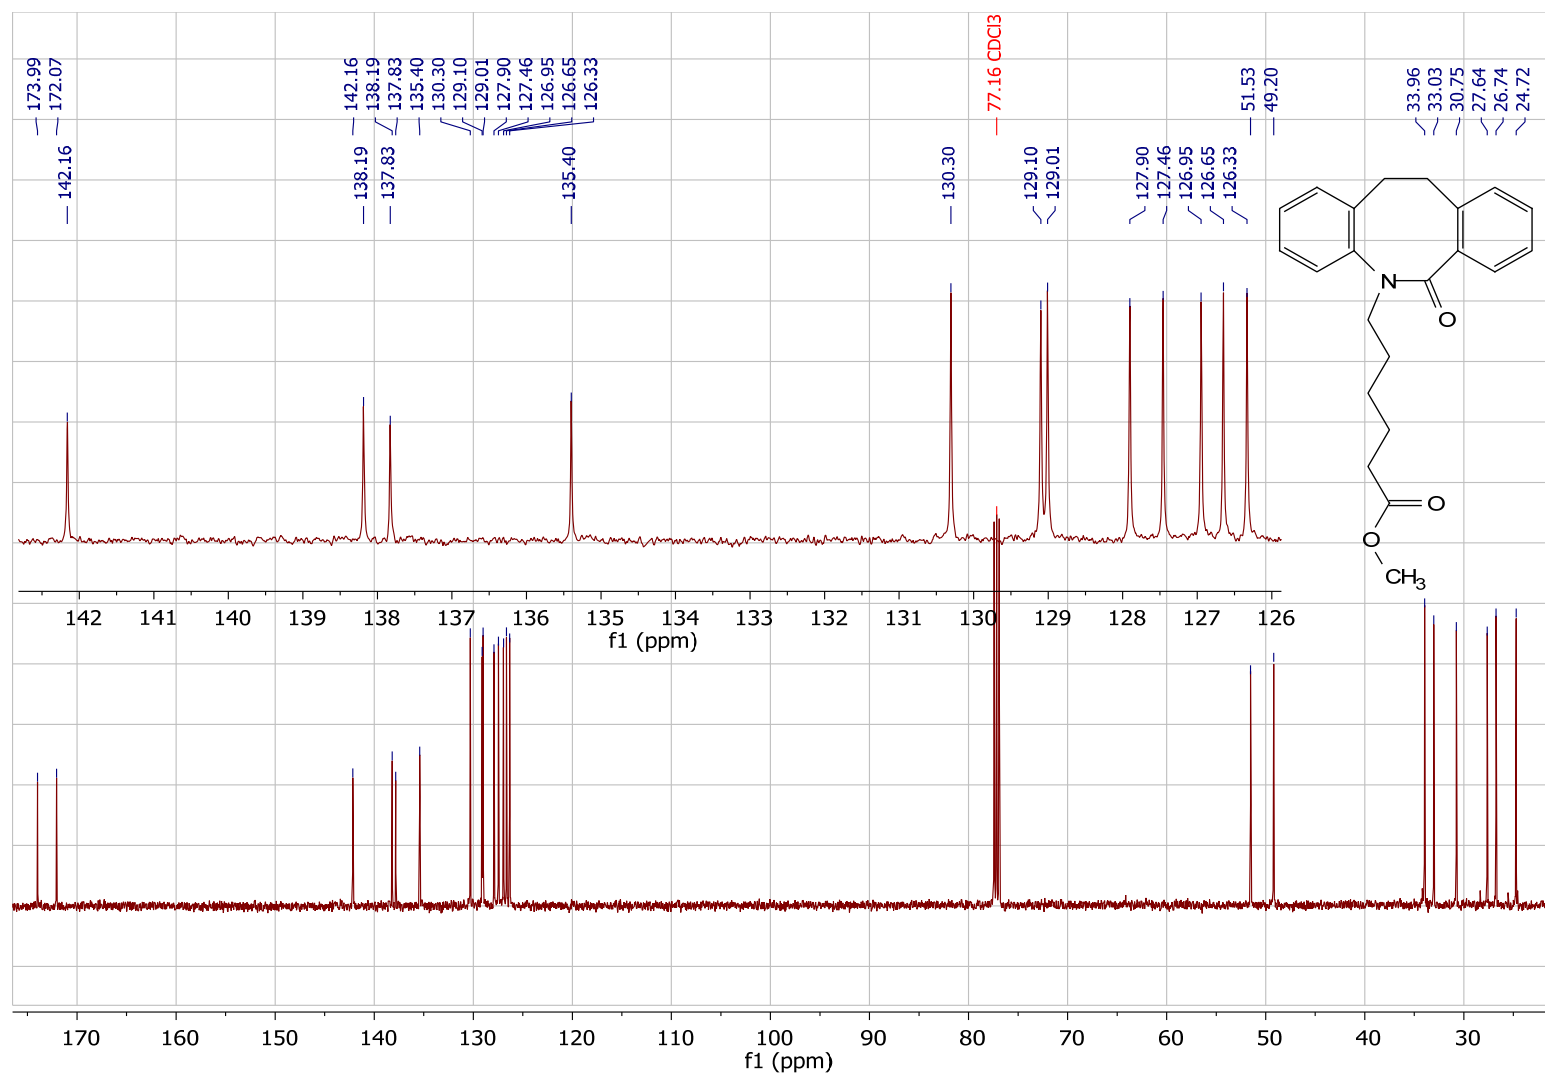

**Figure S54.** <sup>13</sup>C NMR spectrum of methyl 6-(6-oxo-11,12-dihydrodibenzo[*b,f*]azocin-5(6*H*)-yl)hexanoate (10p).

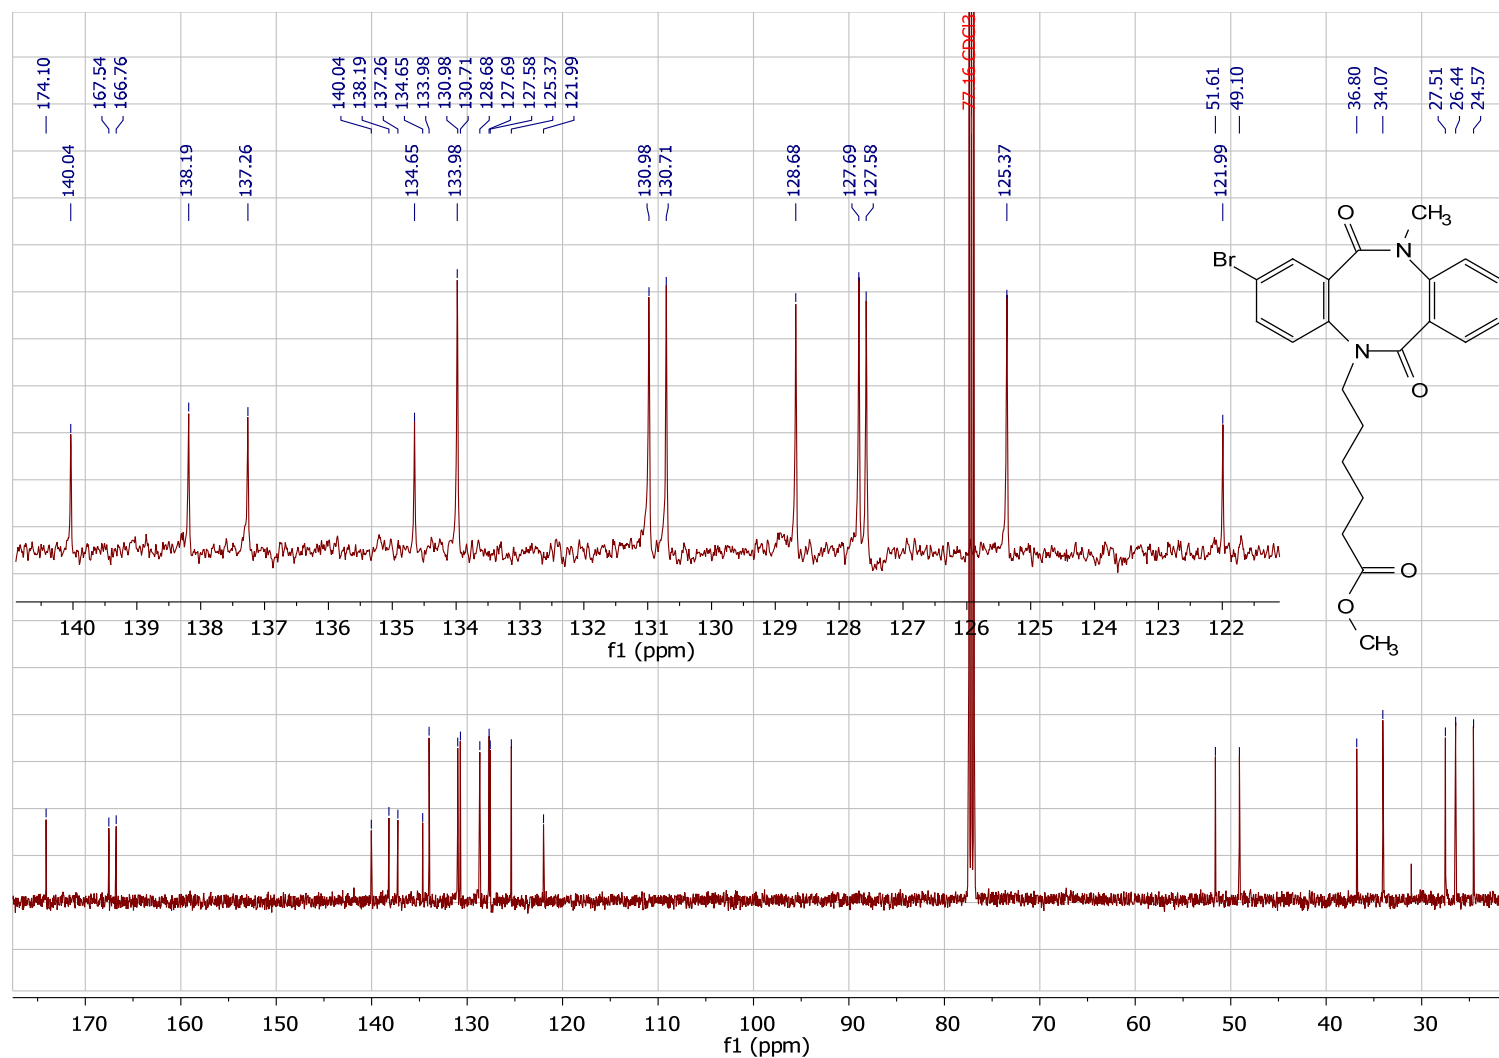

**Figure S55.** <sup>13</sup>C NMR spectrum of methyl 6-(2-bromo-11-methyl-6,12-dioxo-11,12-dihydrodibenzo[*b,f*][1,5]diazocin-5(6*H*)-yl)hexanoate (**10r**).

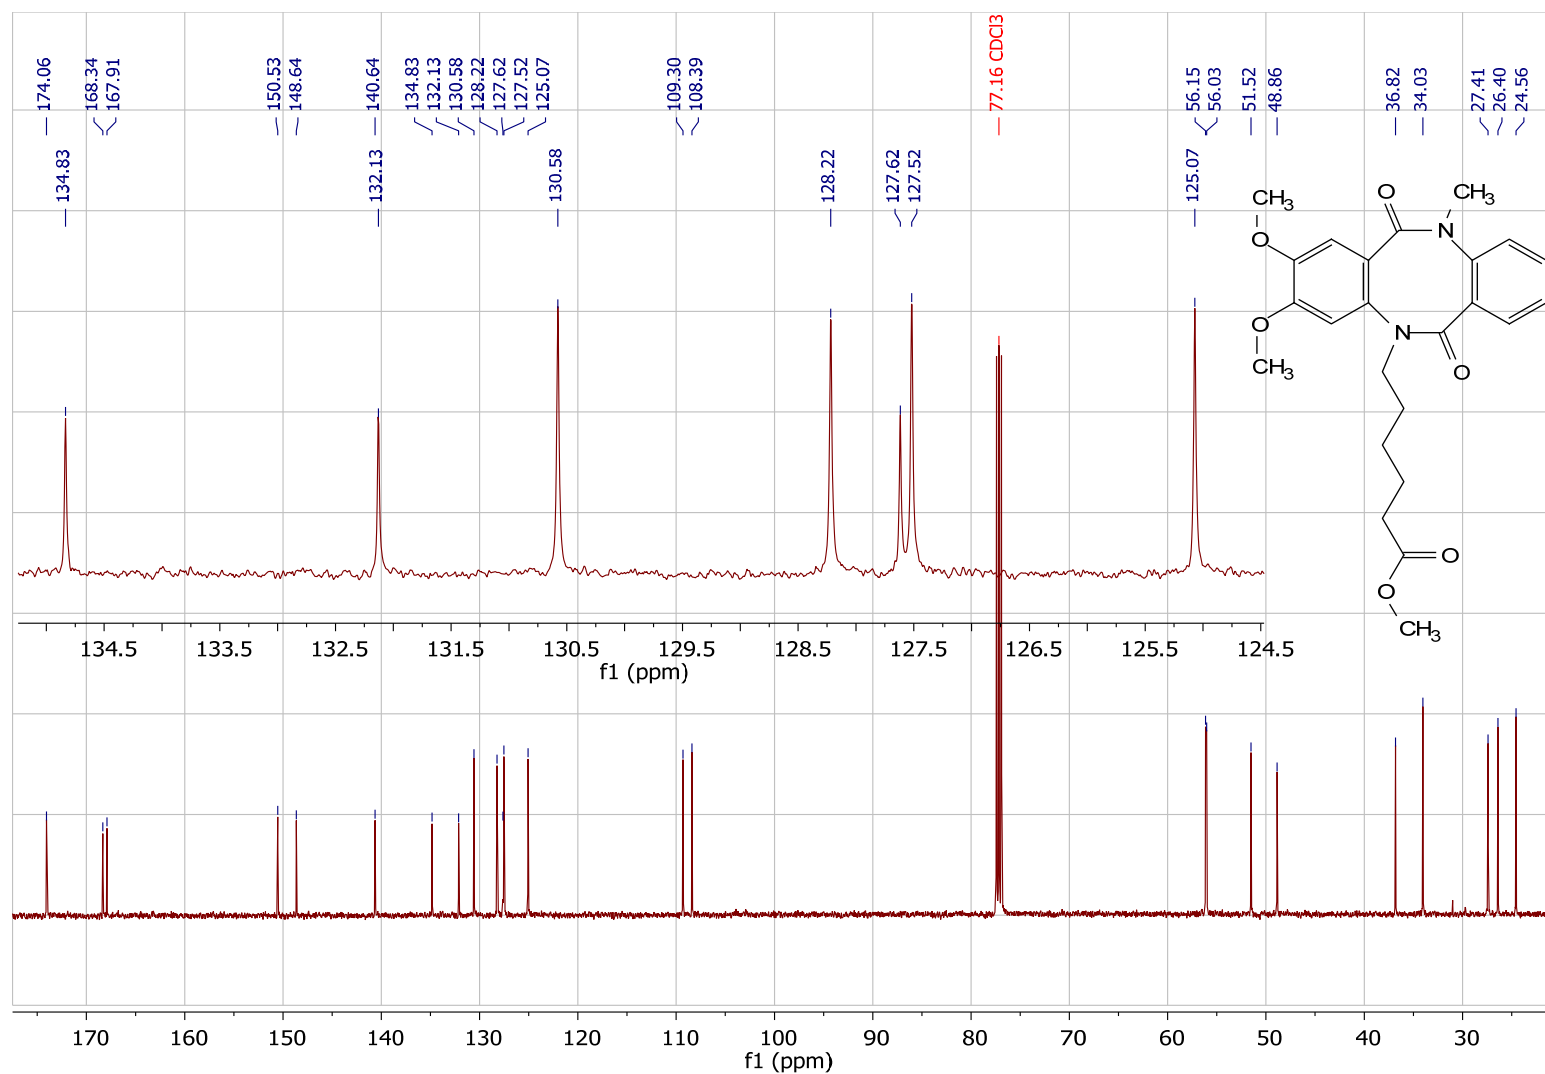

**Figure S56.** <sup>13</sup>C NMR spectrum of methyl 6-(2,3-dimethoxy-11-methyl-6,12-dioxo-11,12-dihydrodibenzo[*b,f*][1,5]diazocin-5(6*H*)-yl)hexanoate (**10s**).

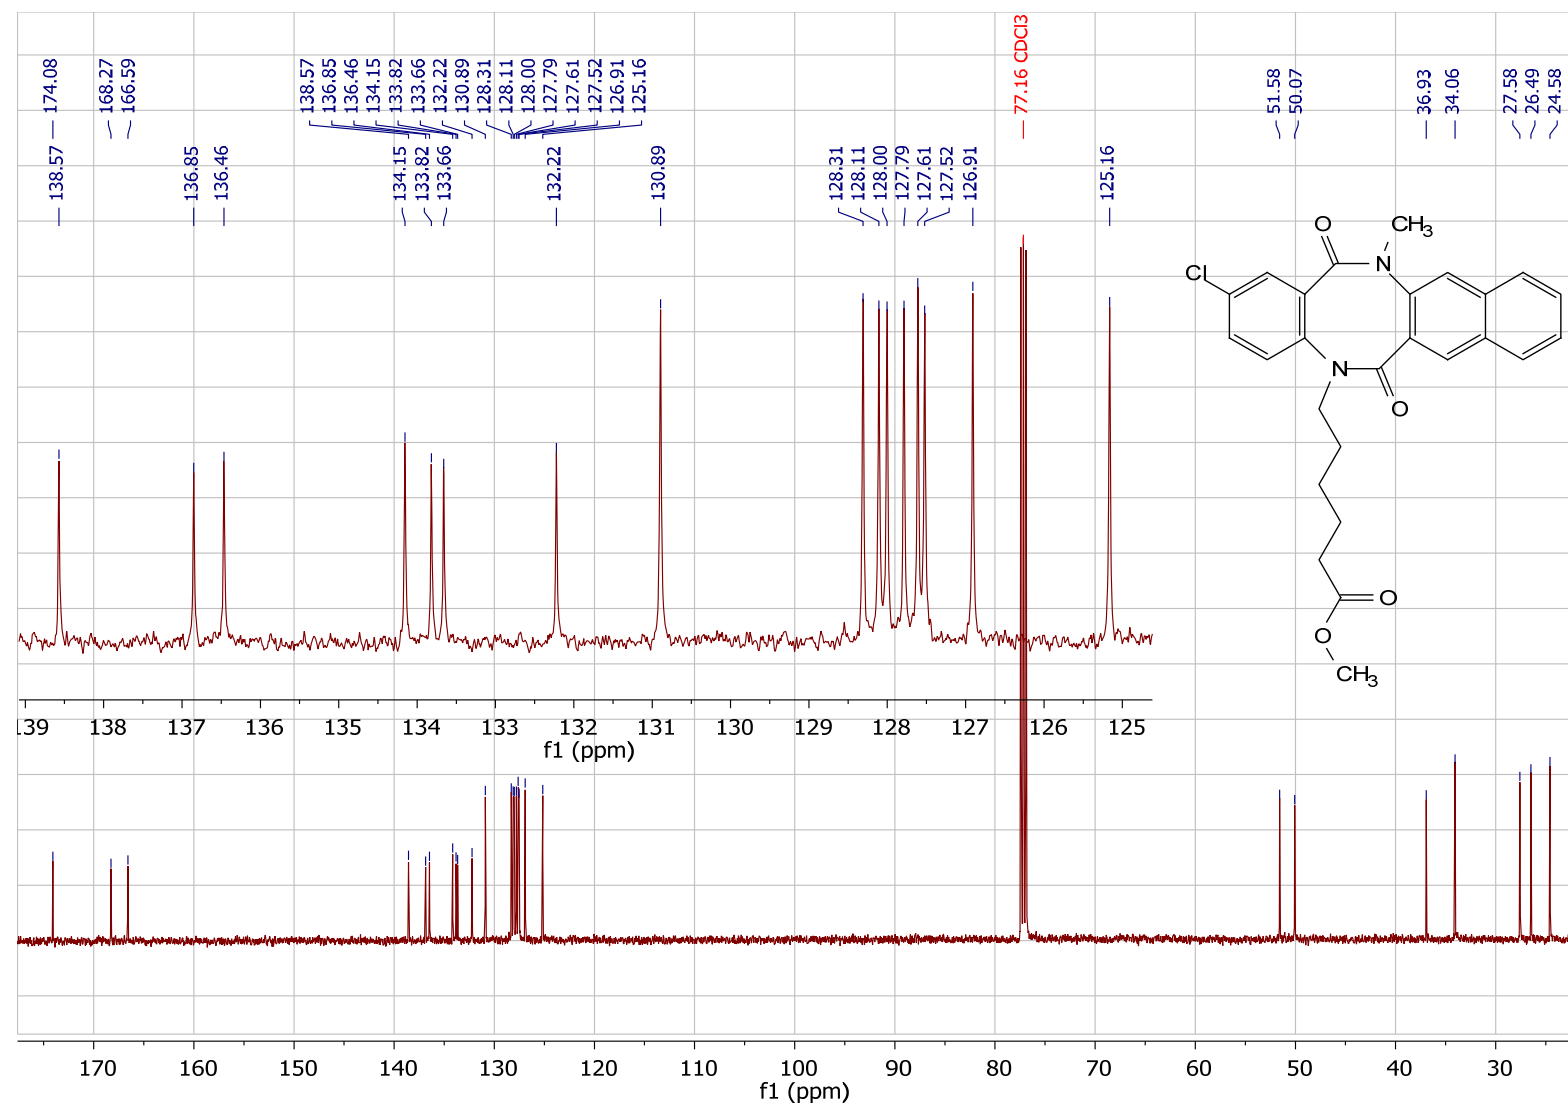

**Figure S57.**  $^{13}\text{C}$  NMR spectrum of methyl 6-(5-methyl-6,14-dioxo-5,14-dihydrobenzonaphtho[2,3-f][1,5]diazocin-13(6H)-yl)hexanoate (10t).

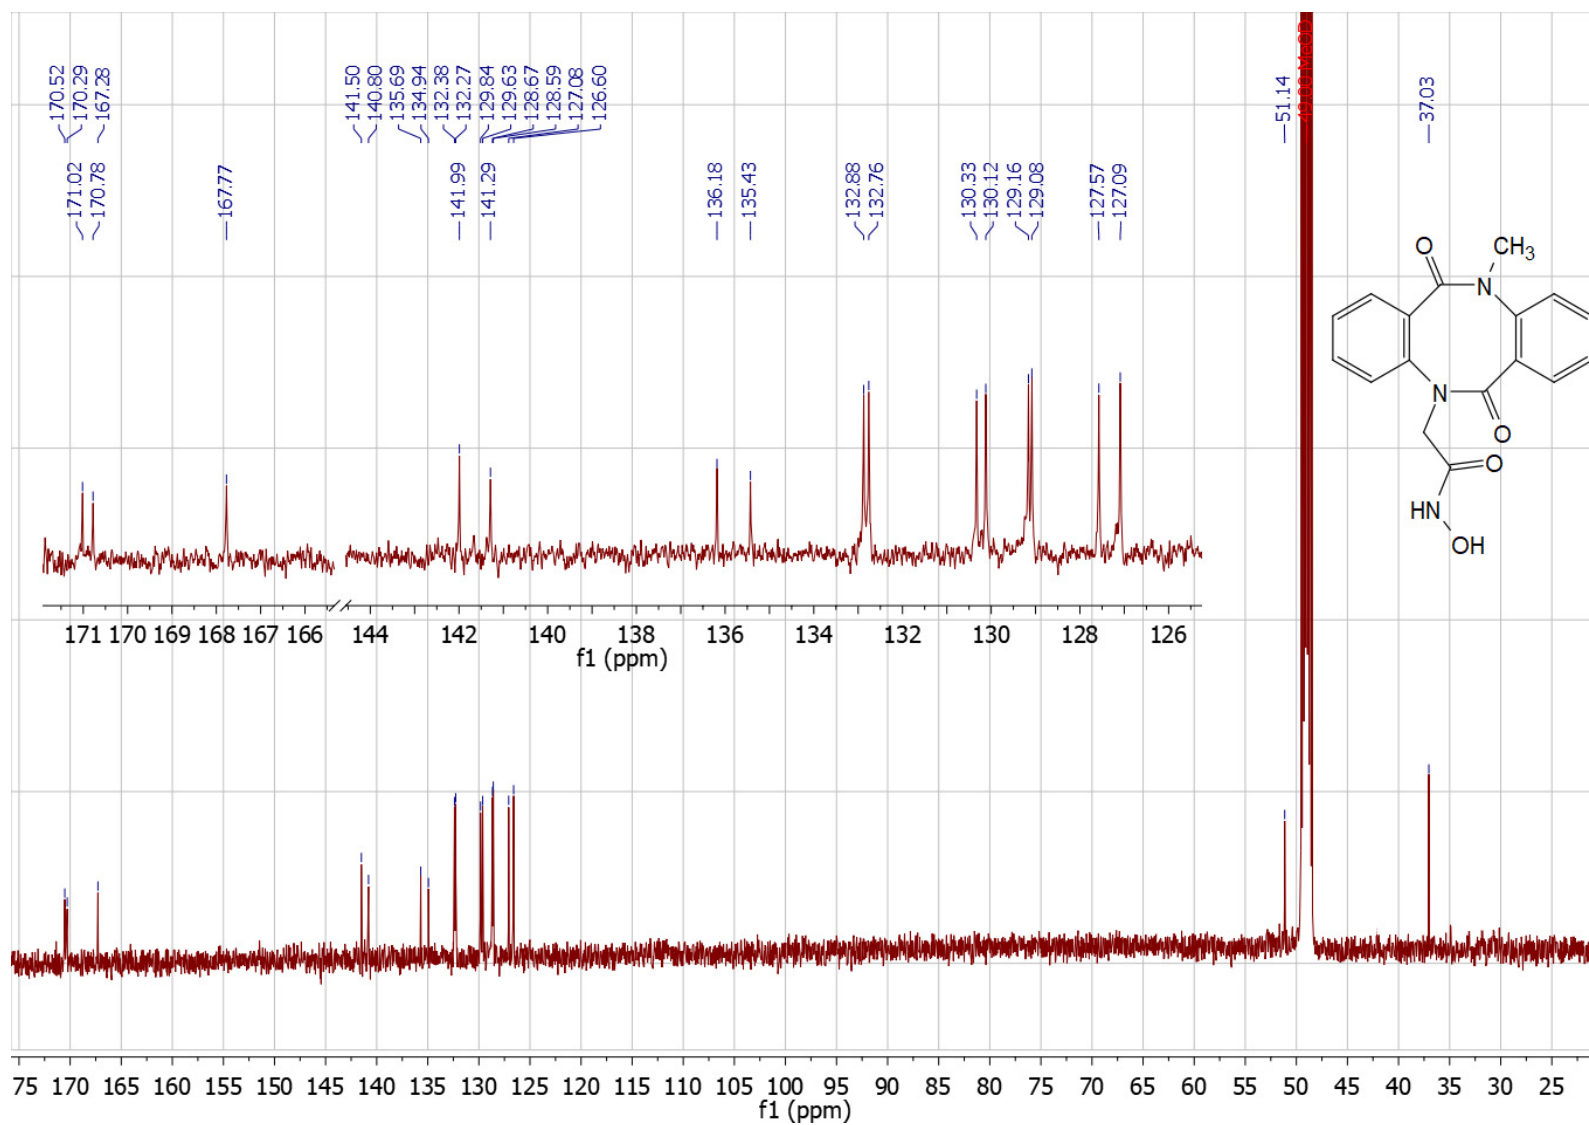

**Figure S58.** <sup>13</sup>C NMR spectrum of *N*-hydroxy-2-(11-methyl-6,12-dioxo-11,12-dihydrodibenzo[*b,f*][1,5]diazocin-5(6*H*)-yl)acetamide (7a).

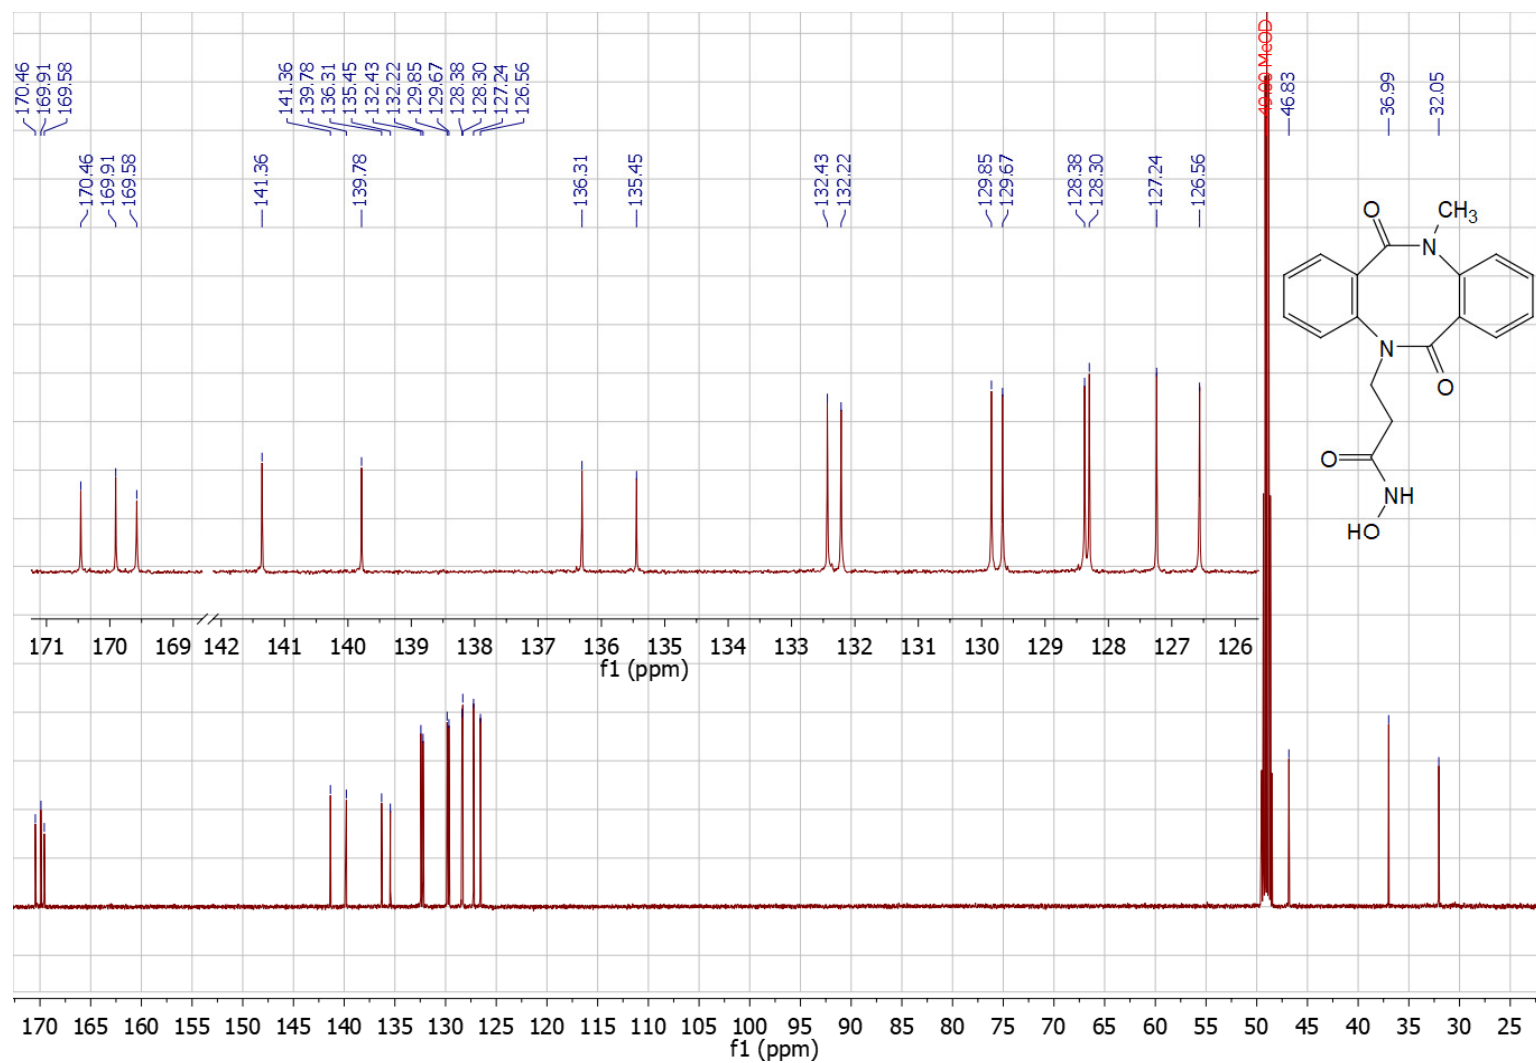

**Figure S59.** <sup>13</sup>C NMR spectrum of *N*-hydroxy-3-(11-methyl-6,12-dioxo-11,12-dihydrodibenzo[*b,f*][1,5]diazocin-5(6*H*)-yl)propanamide (**7b**).

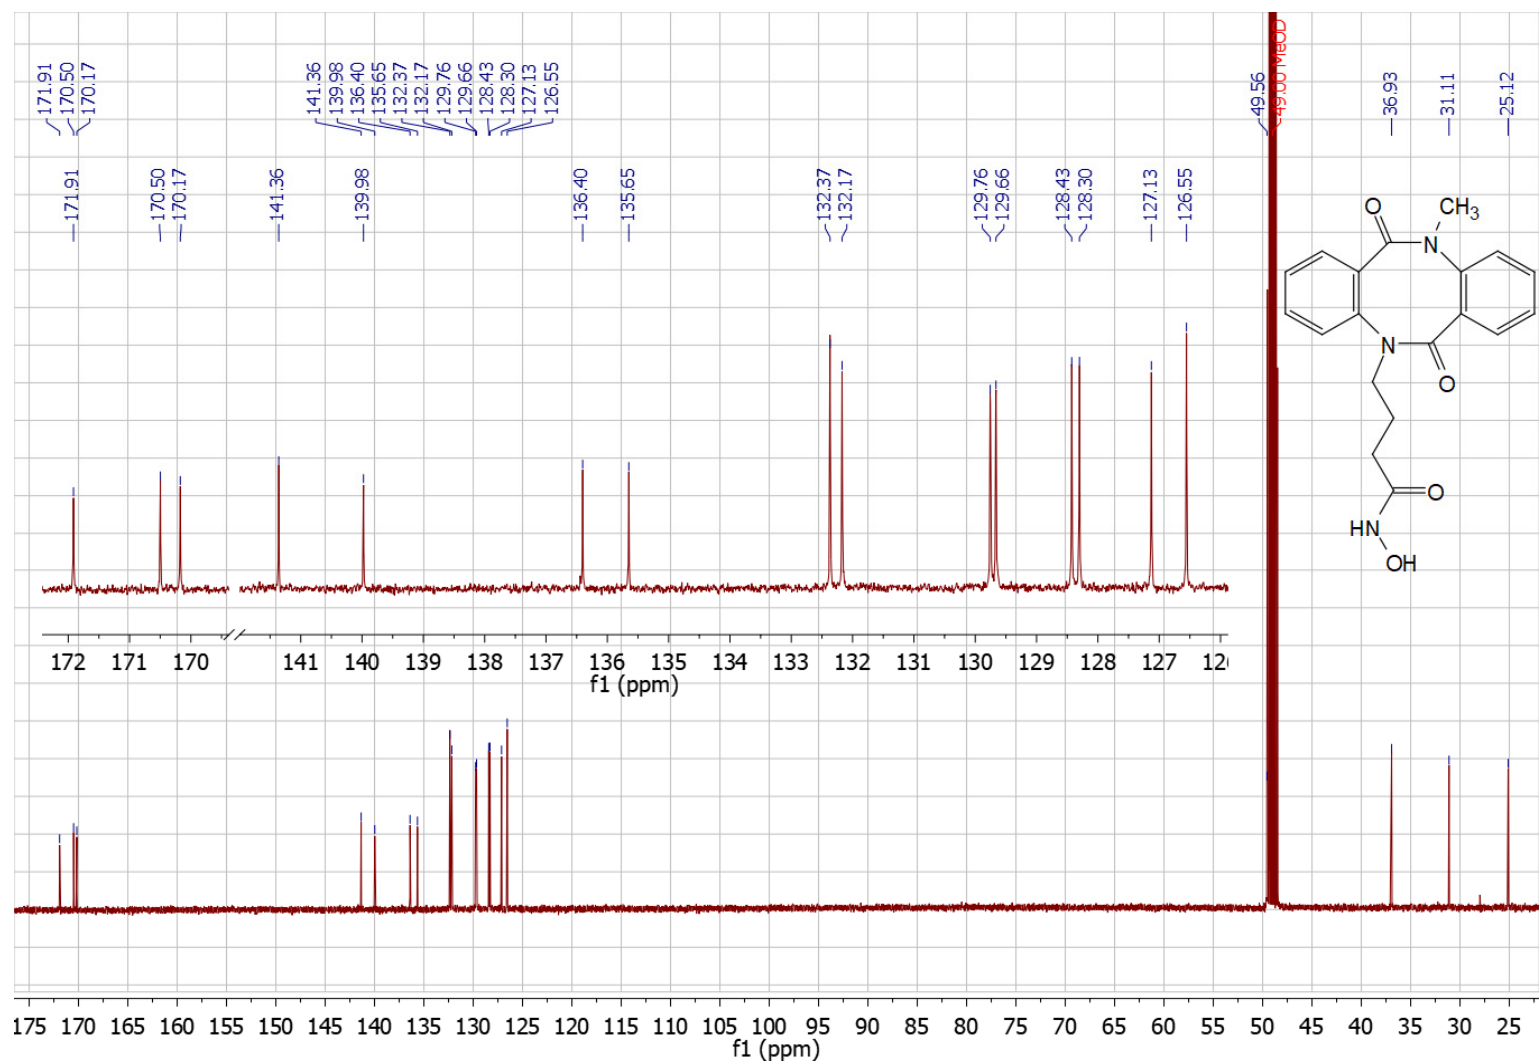

**Figure S60.**  $^{13}\text{C}$  NMR spectrum of *N*-hydroxy-4-(11-methyl-6,12-dioxo-11,12-dihydrodibenzo[*b,f*][1,5]diazocin-5(6*H*)-yl)butanamide (**7c**).

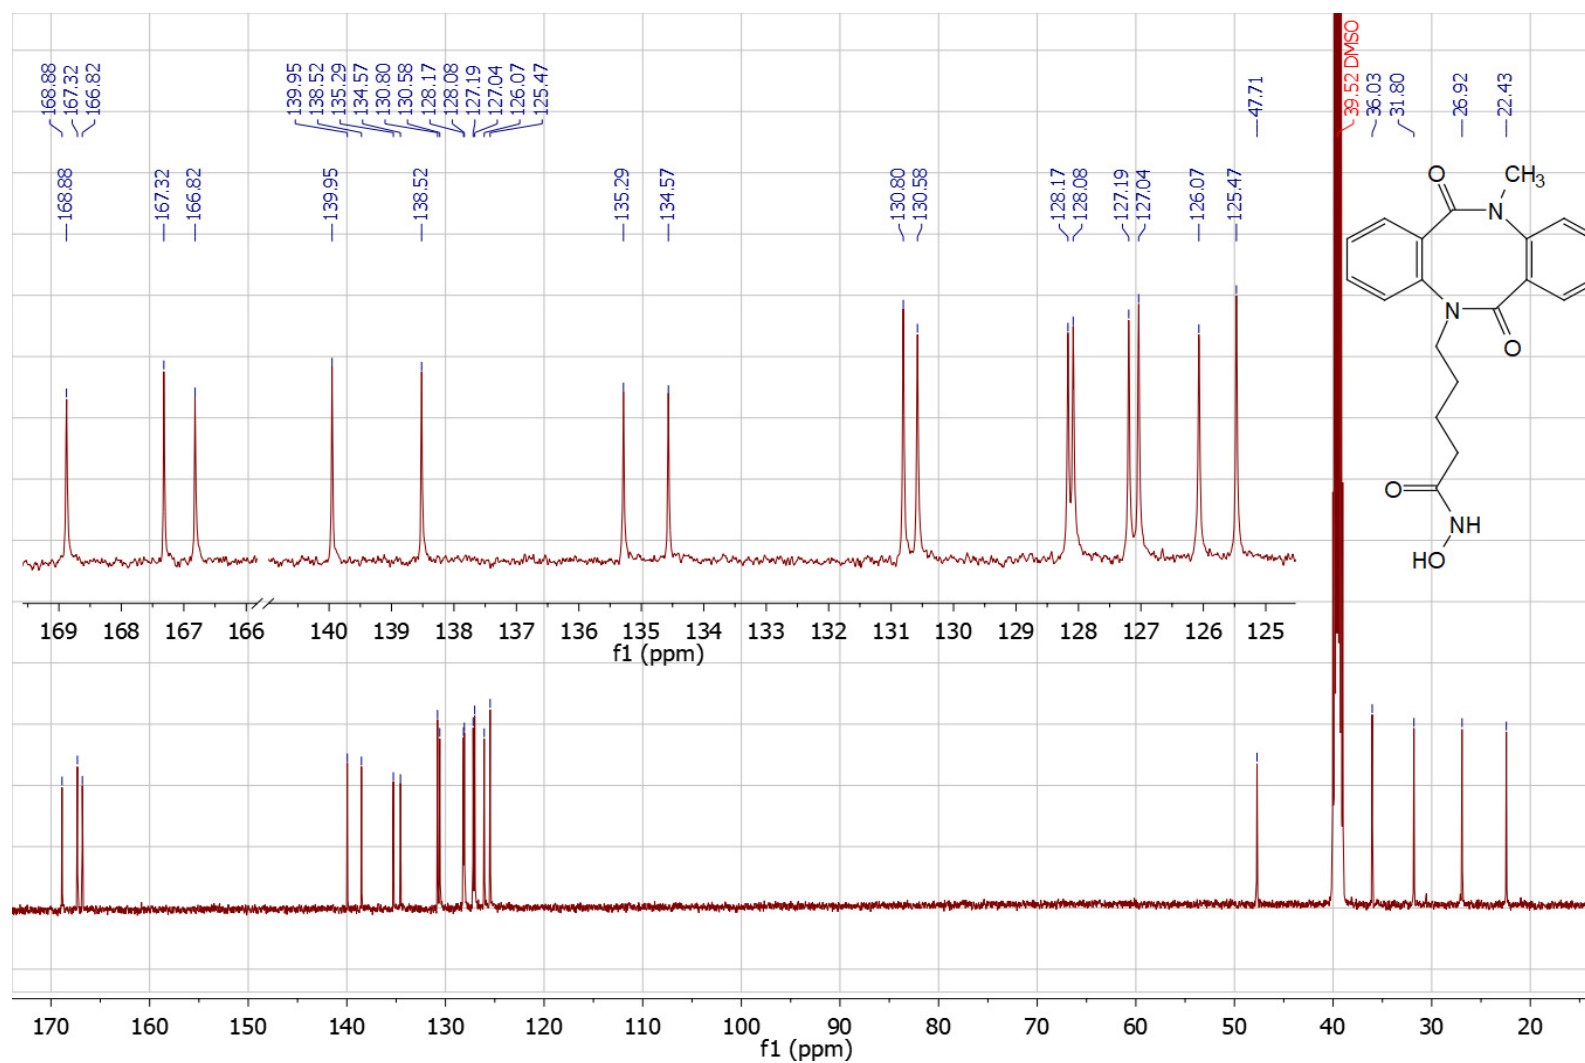

**Figure S61.** <sup>13</sup>C NMR spectrum of *N*-hydroxy-5-(11-methyl-6,12-dioxo-11,12-dihydrodibenzo[*b,f*][1,5]diazocin-5(6*H*)-yl)pentanamide (7d).

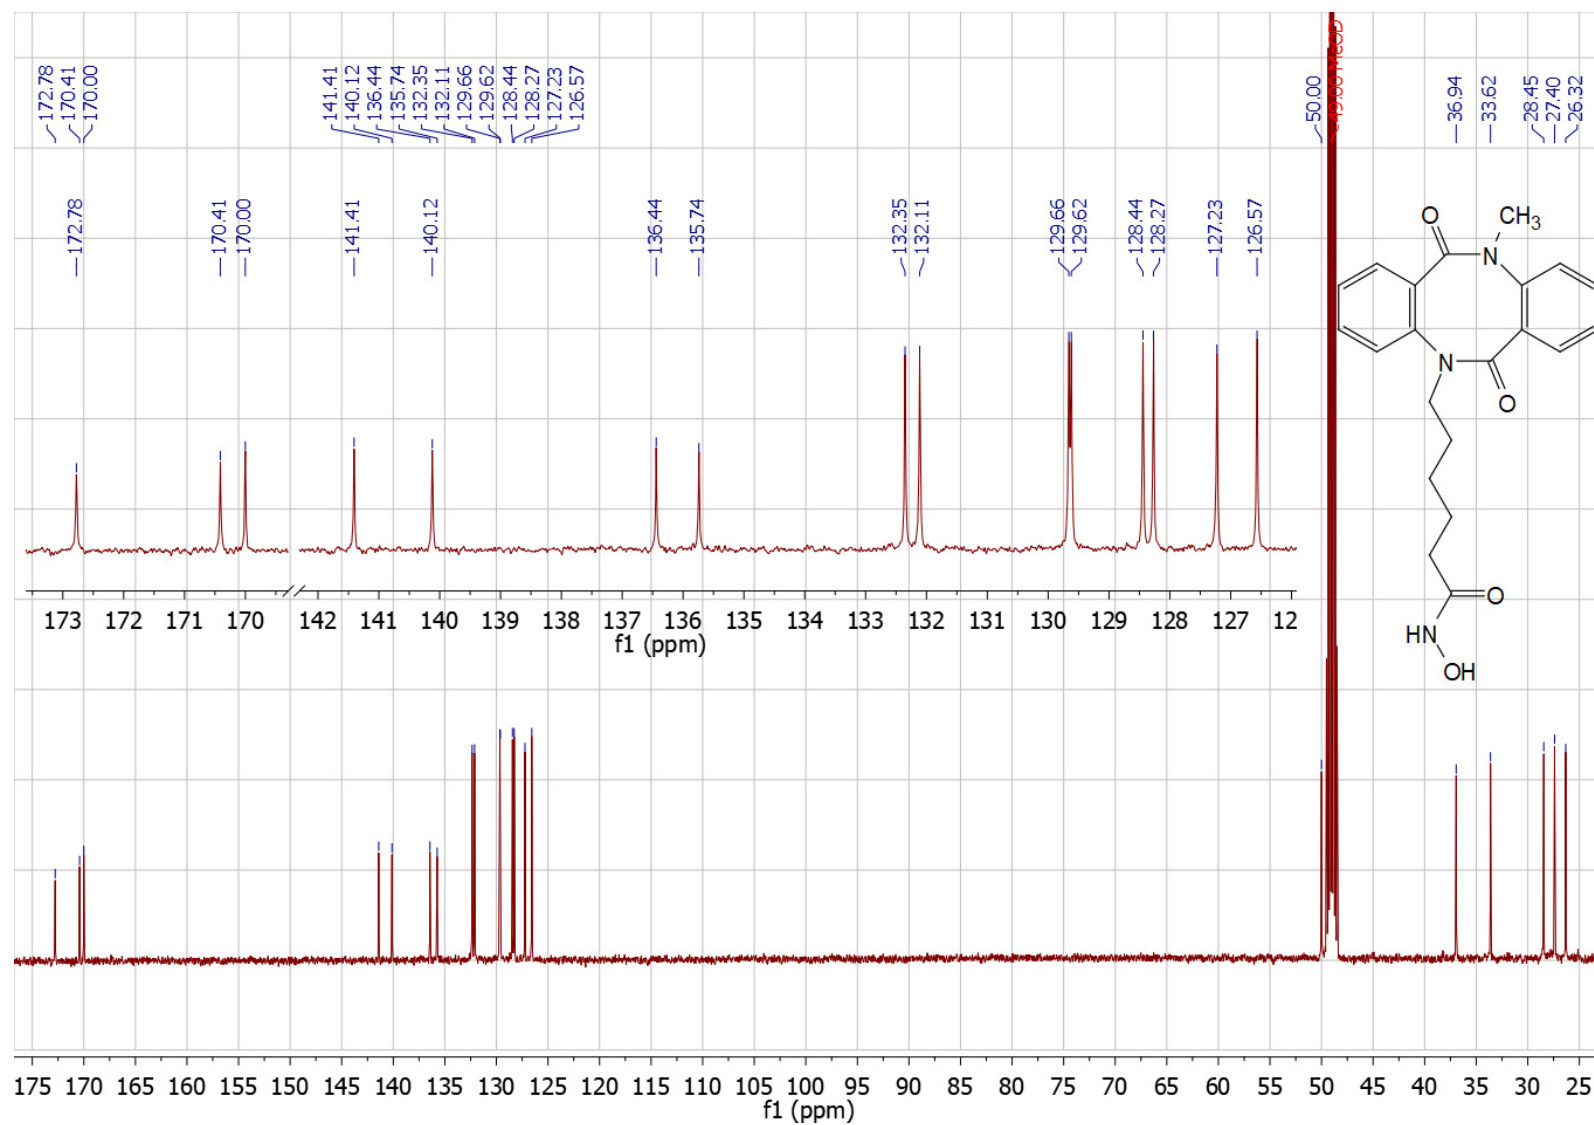

**Figure S62.** <sup>13</sup>C NMR spectrum of *N*-hydroxy-6-(11-methyl-6,12-dioxo-11,12-dihydrodibenzo[*b,f*][1,5]diazocin-5(6*H*)-yl)hexanamide (7e).

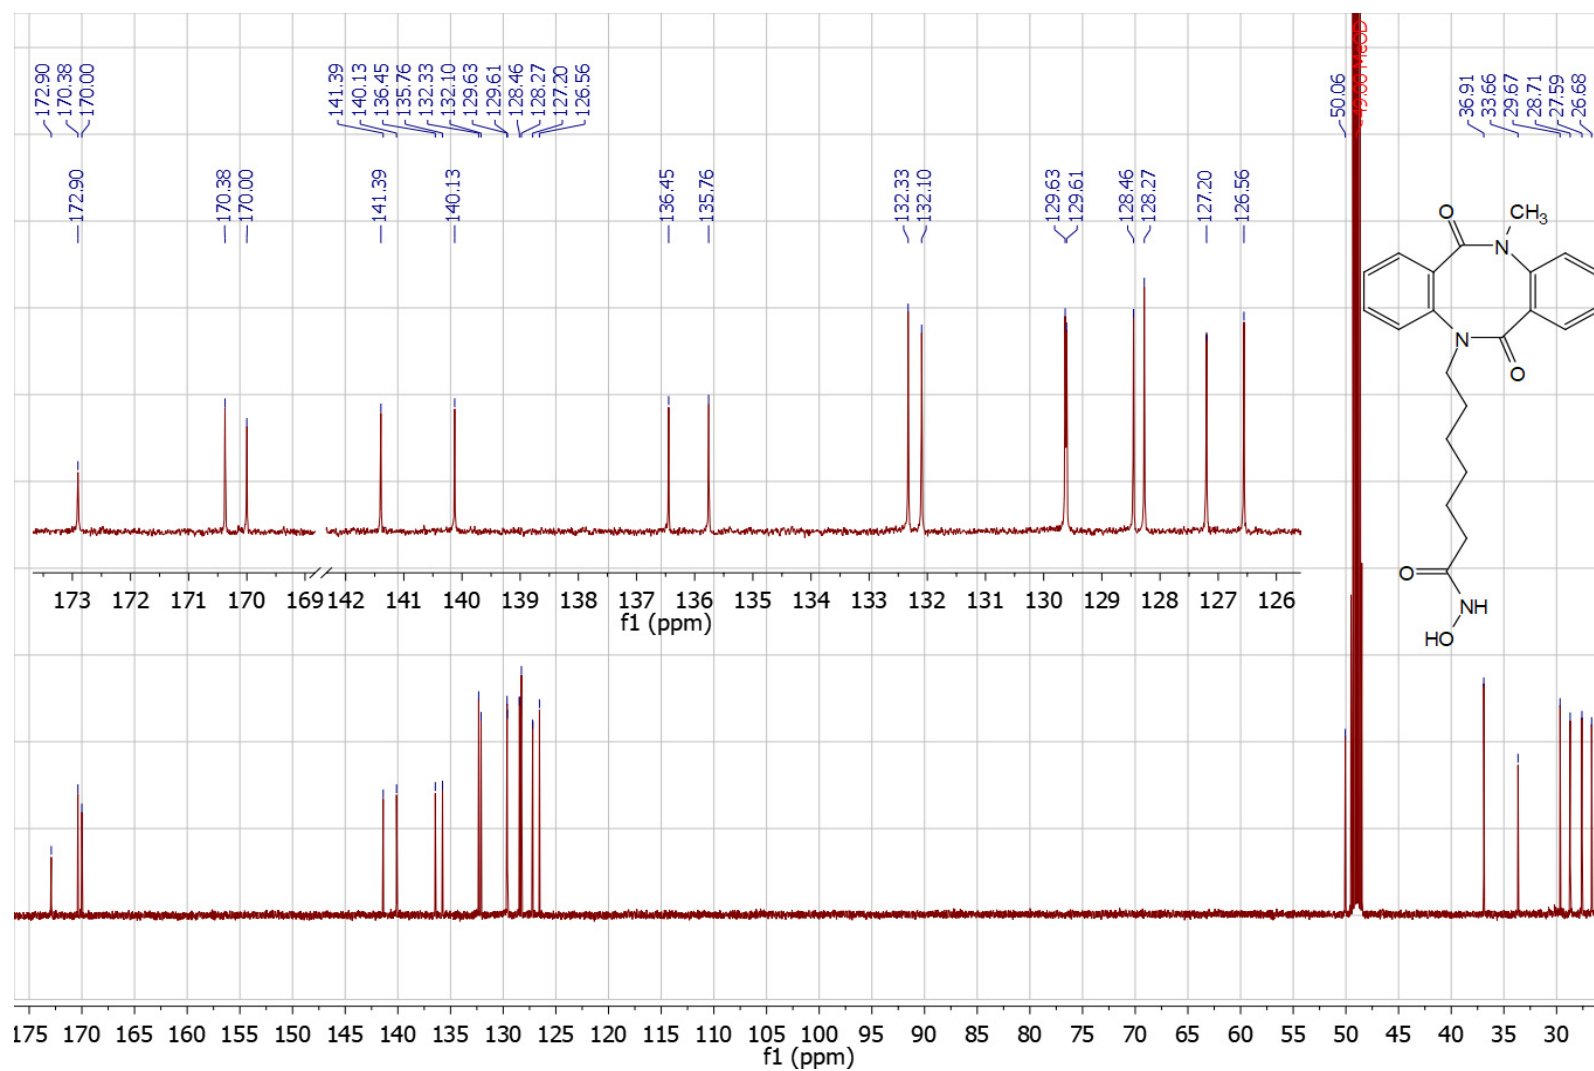

**Figure S63.**  $^{13}\text{C}$  NMR spectrum of *N*-hydroxy-7-(11-methyl-6,12-dioxo-11,12-dihydrodibenzo[*b,f*][1,5]diazocin-5(6*H*)-yl)heptanamide (7f).

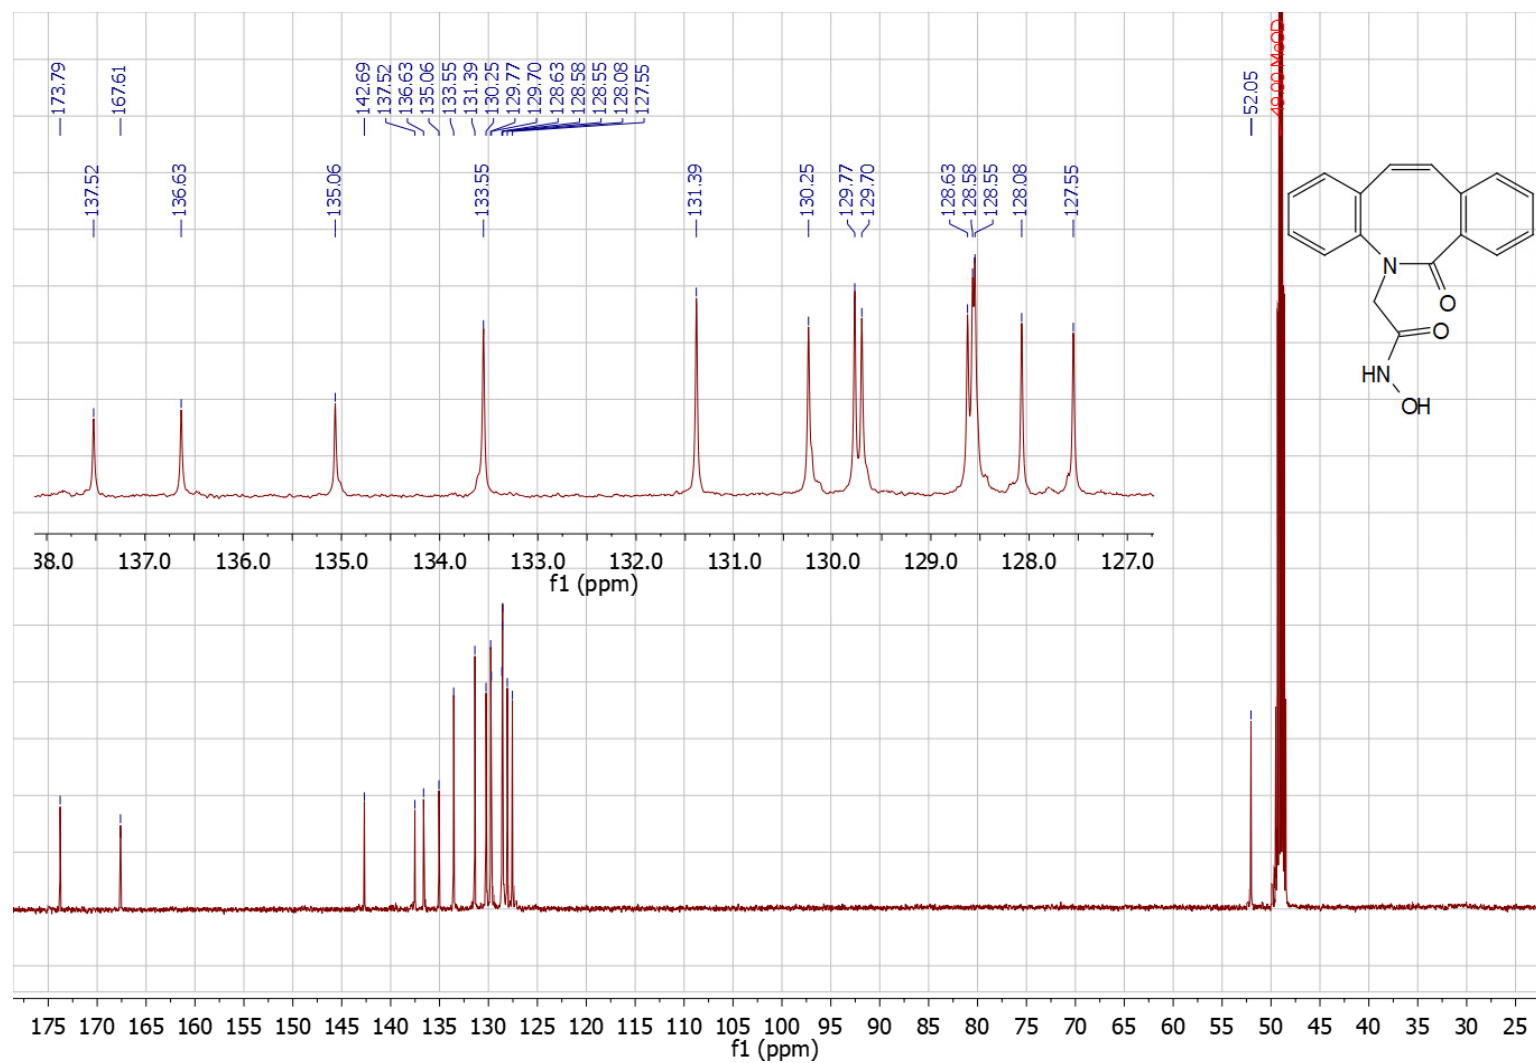

**Figure S64.**  $^{13}\text{C}$  NMR spectrum of *N*-hydroxy-2-(6-oxodibenzo[*b,f*]azocin-5(6*H*)-yl)acetamide (7g).

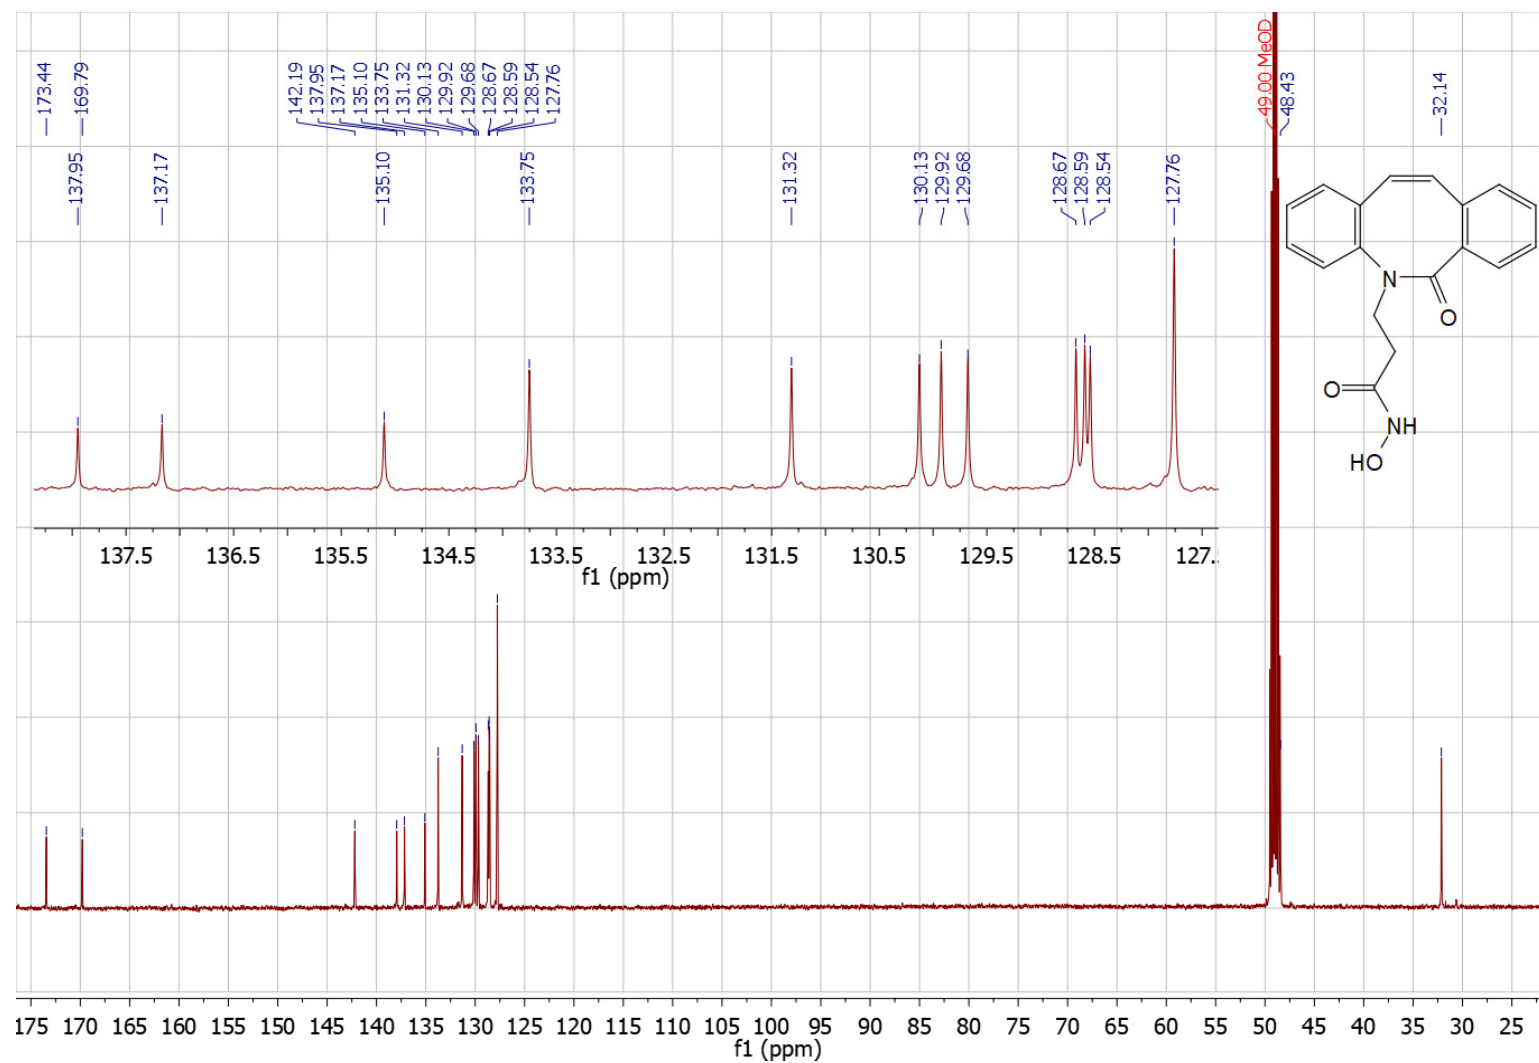

**Figure S65.**  $^{13}\text{C}$  NMR spectrum of *N*-hydroxy-3-(6-oxodibenzo[*b,f*]azocin-5(6*H*)-yl)propanamide (**7h**).

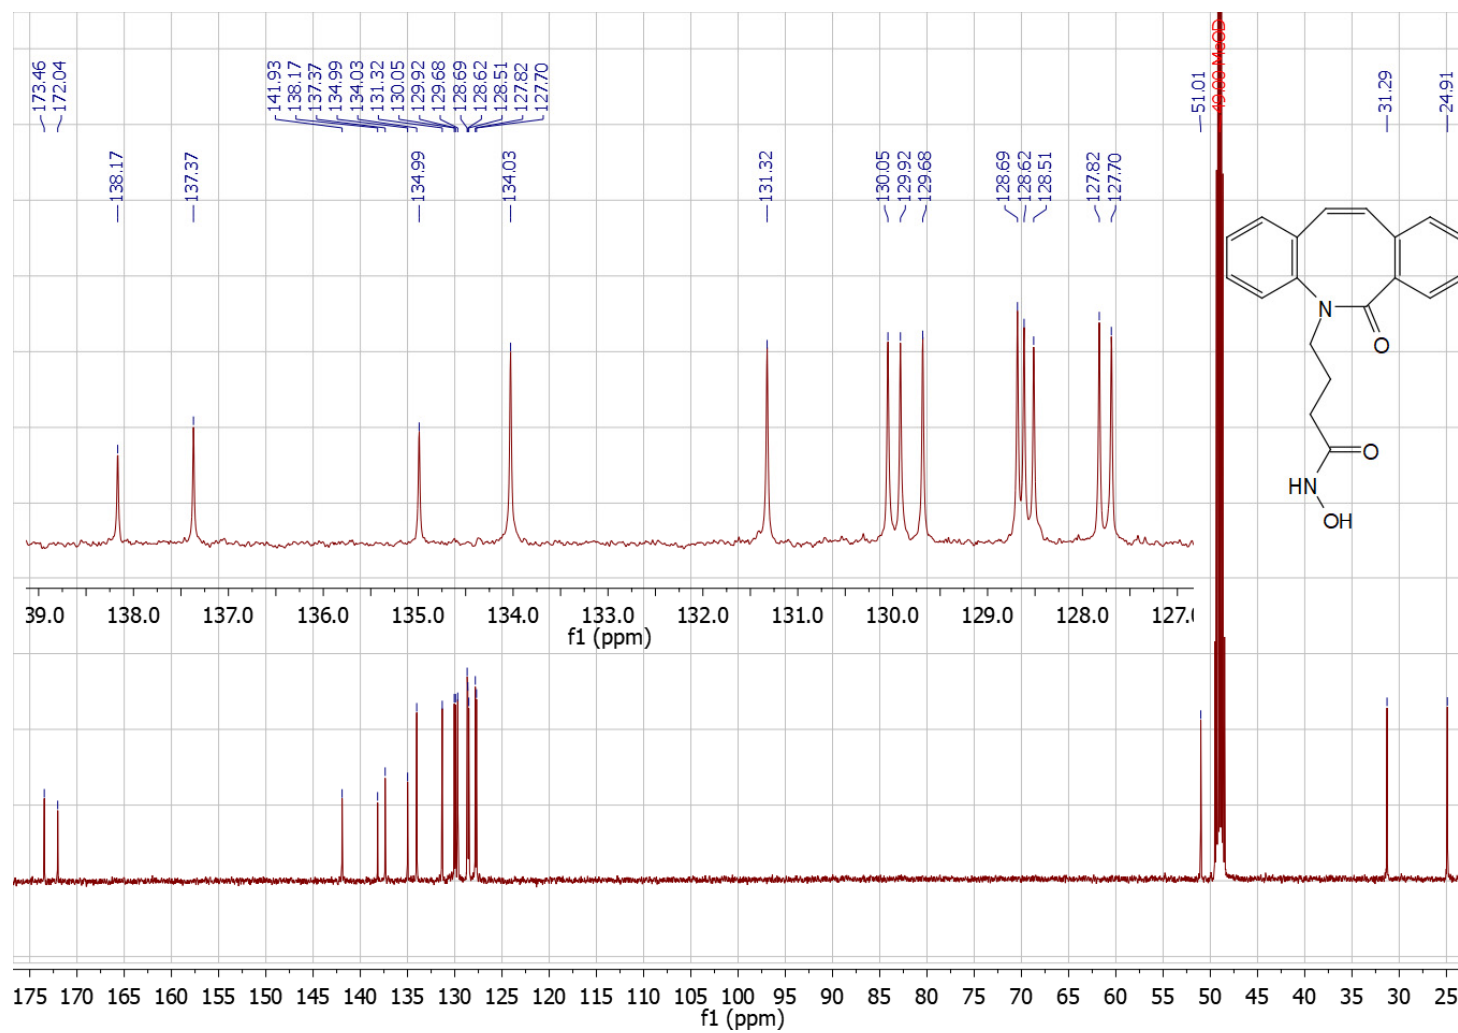

**Figure S66.** <sup>13</sup>C NMR spectrum of *N*-hydroxy-4-(6-oxodibenzo[*b,f*]azocin-5(6*H*)-yl)butanamide (7i).

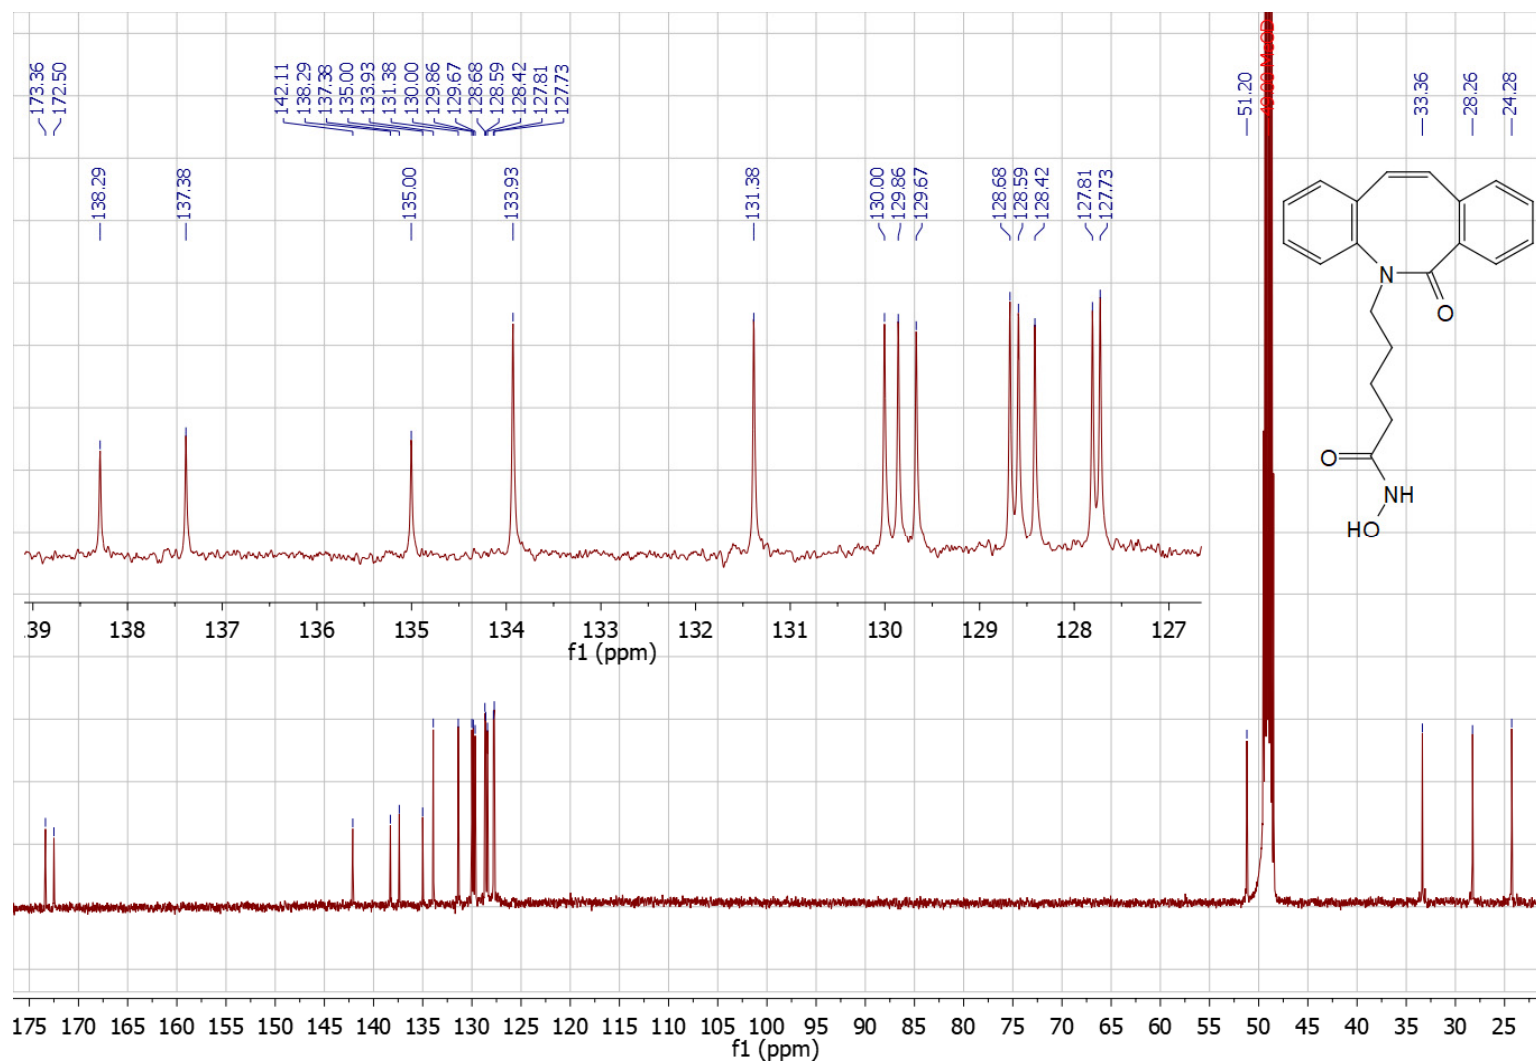

**Figure S67.**  $^{13}\text{C}$  NMR spectrum of *N*-hydroxy-5-(6-oxodibenzo[*b,f*]azocin-5(6*H*)-yl)pentanamide (**7j**).

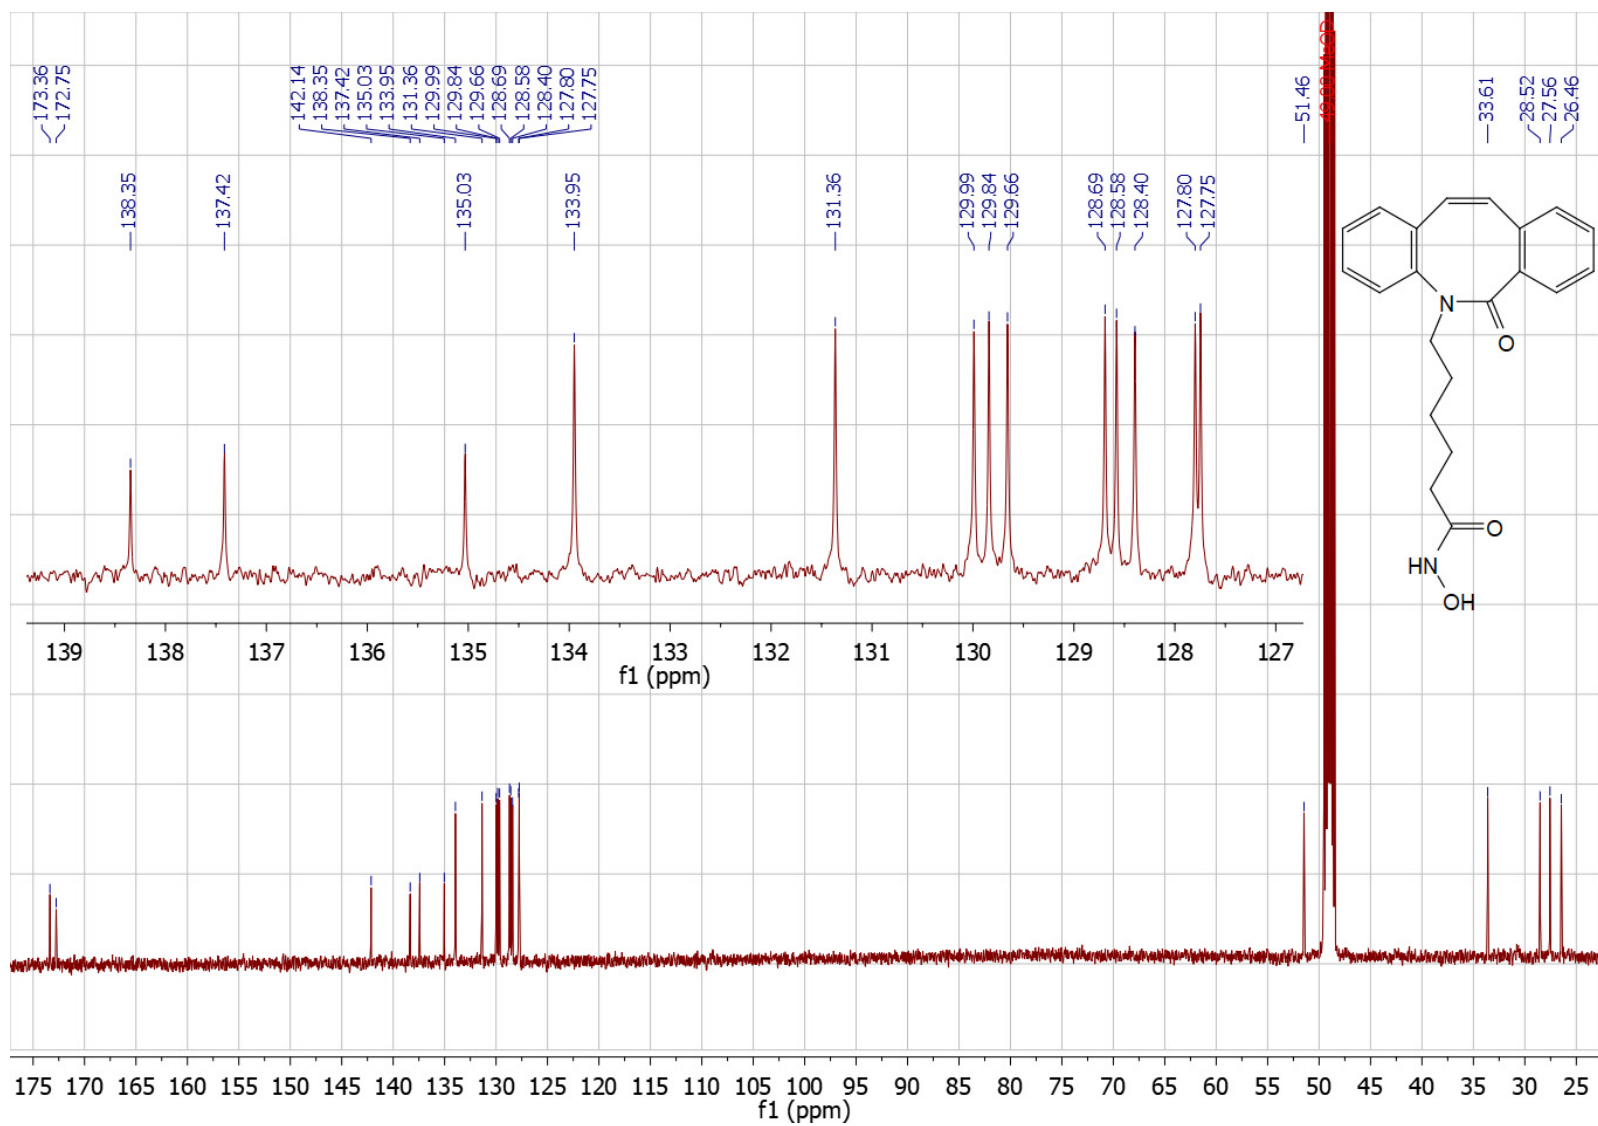

**Figure S68.** <sup>13</sup>C NMR spectrum of N-hydroxy-6-(6-oxodibenzo[*b,f*]azocin-5(6*H*)-yl)hexanamide (7k).

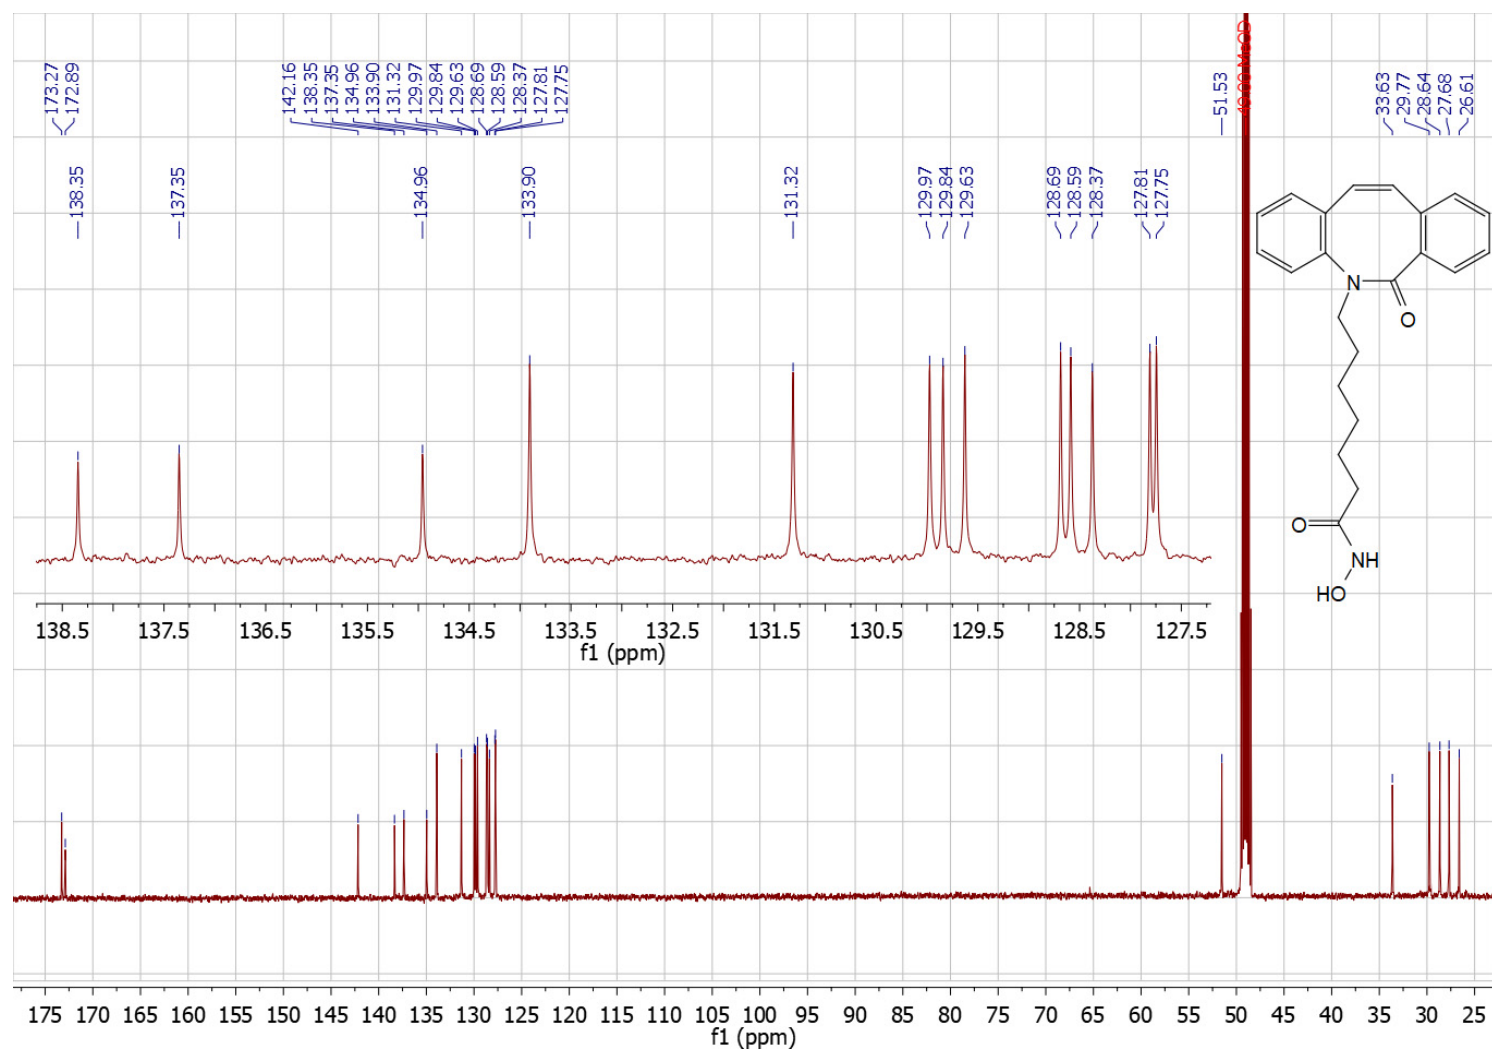

**Figure S69.** <sup>13</sup>C NMR spectrum of *N*-hydroxy-7-(6-oxodibenzo[*b,f*]azocin-5(6*H*)-yl)heptanamide (71).

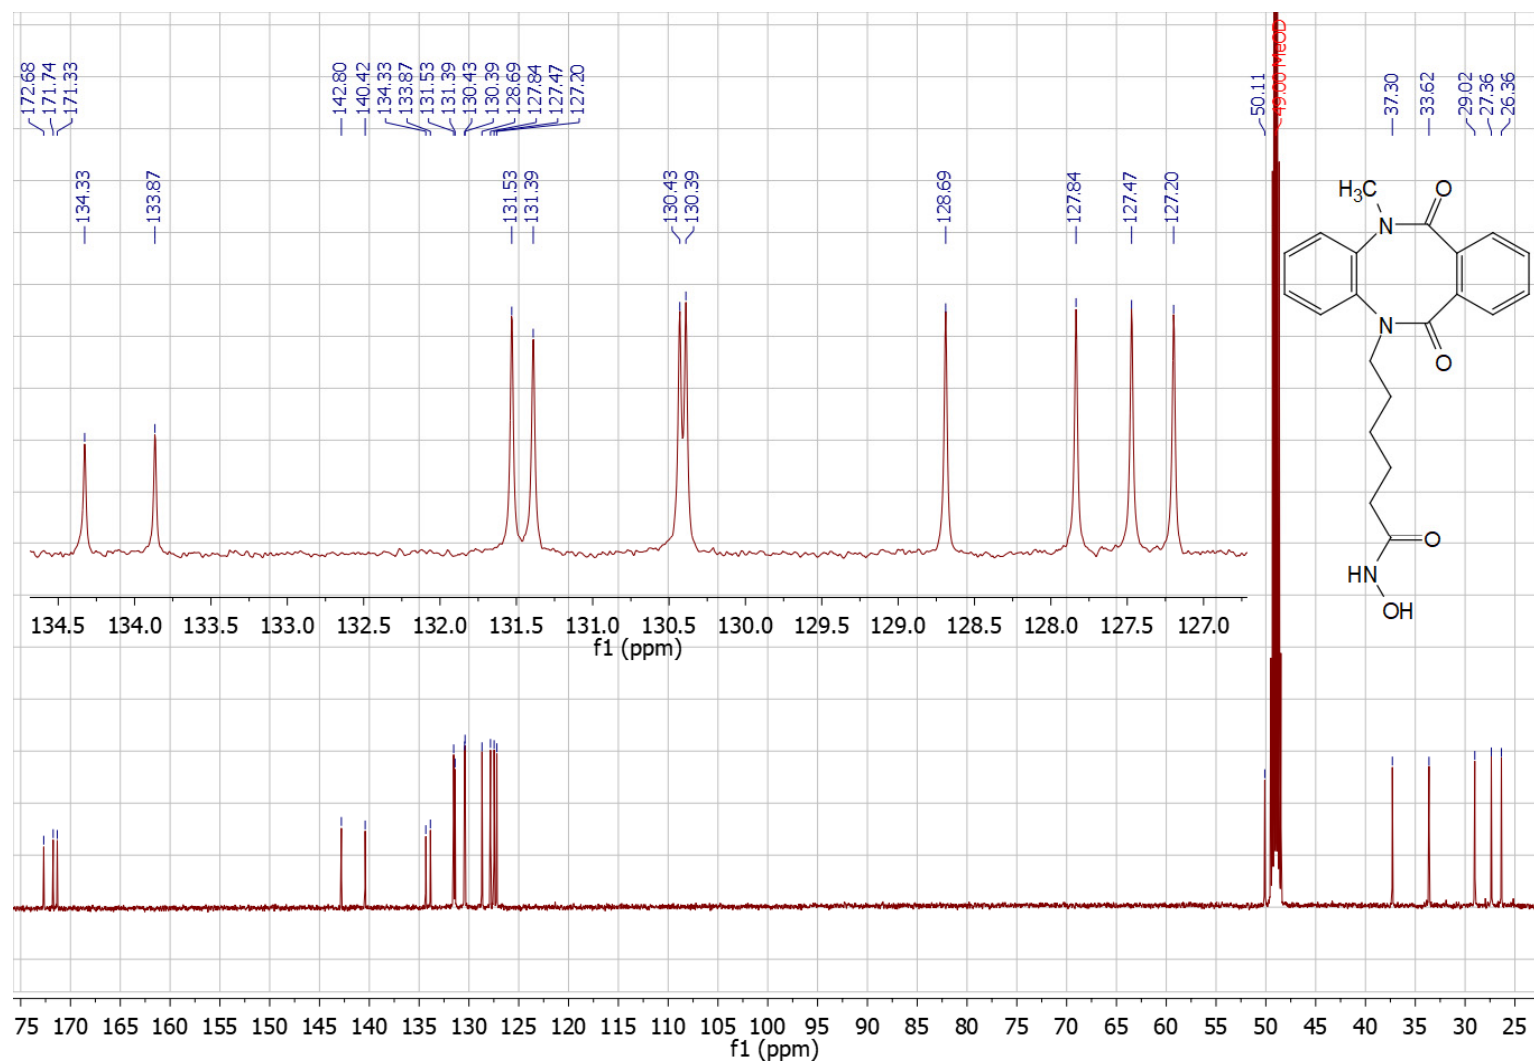

**Figure S70.**  $^{13}\text{C}$  NMR spectrum of *N*-hydroxy-6-(12-methyl-6,11-dioxo-11,12-dihydrodibenzo[*b,f*][1,4]diazocin-5(6*H*)-yl)hexanamide (**7m**).

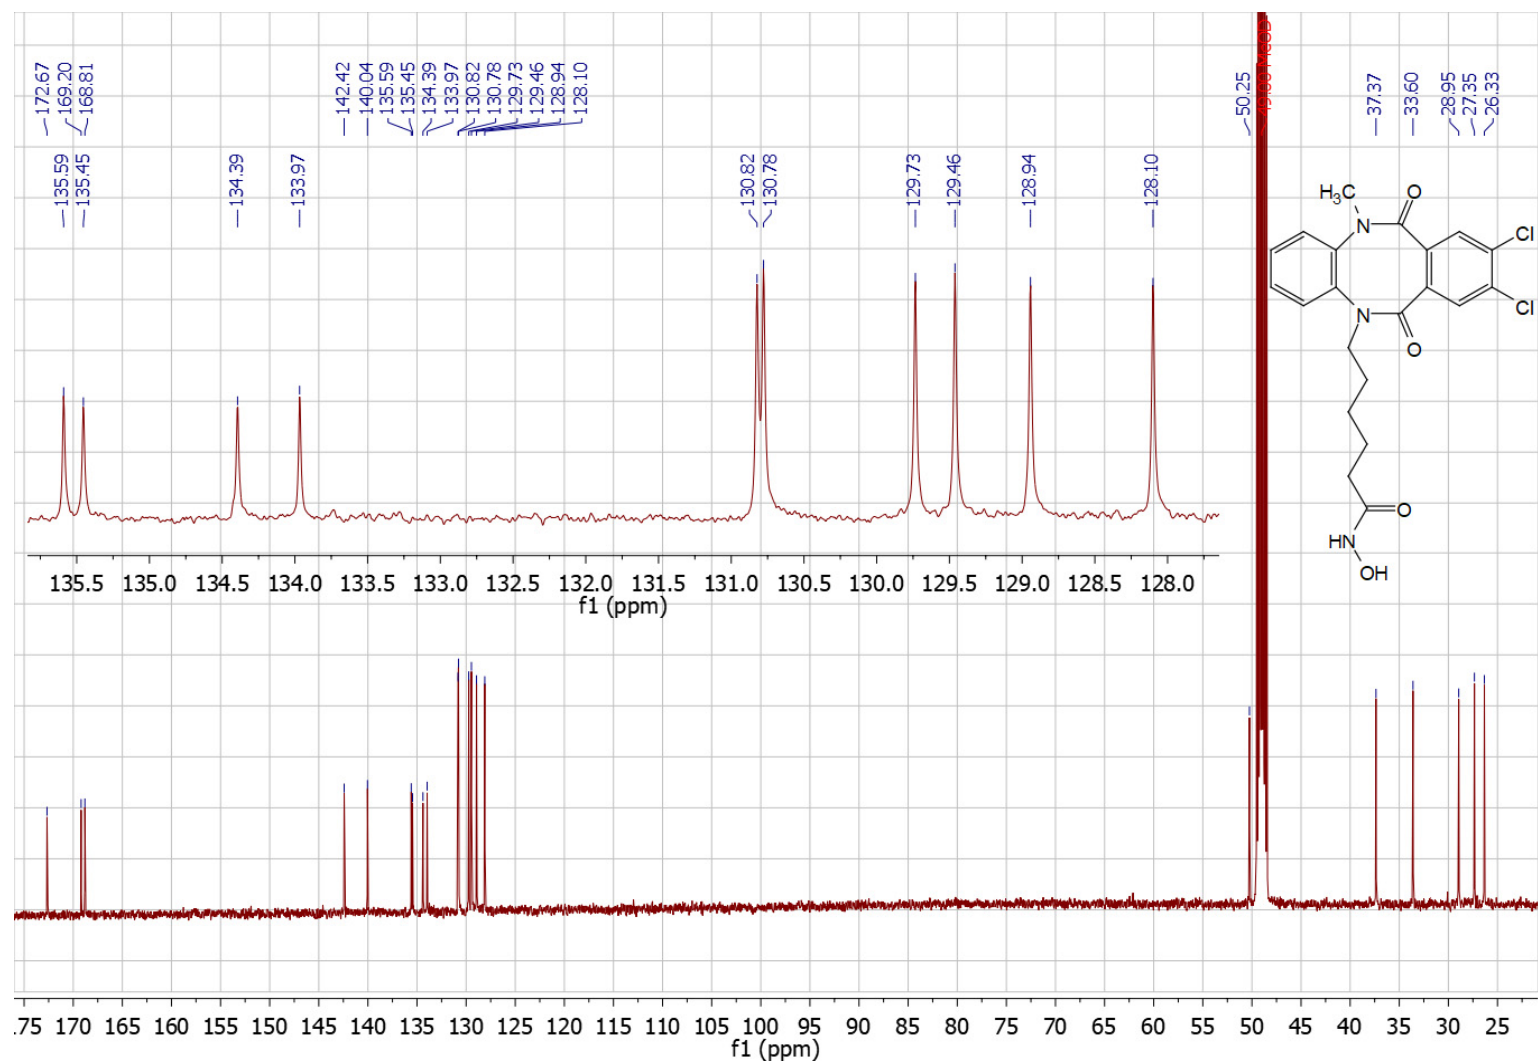

**Figure S71.**  $^{13}\text{C}$  NMR spectrum of *N*-hydroxy-6-(8,9-dichloro-12-methyl-6,11-dioxo-11,12-dihydrodibenzo[*b,f*][1,4]diazocin-5(6*H*)-yl)hexanamide (**7n**).

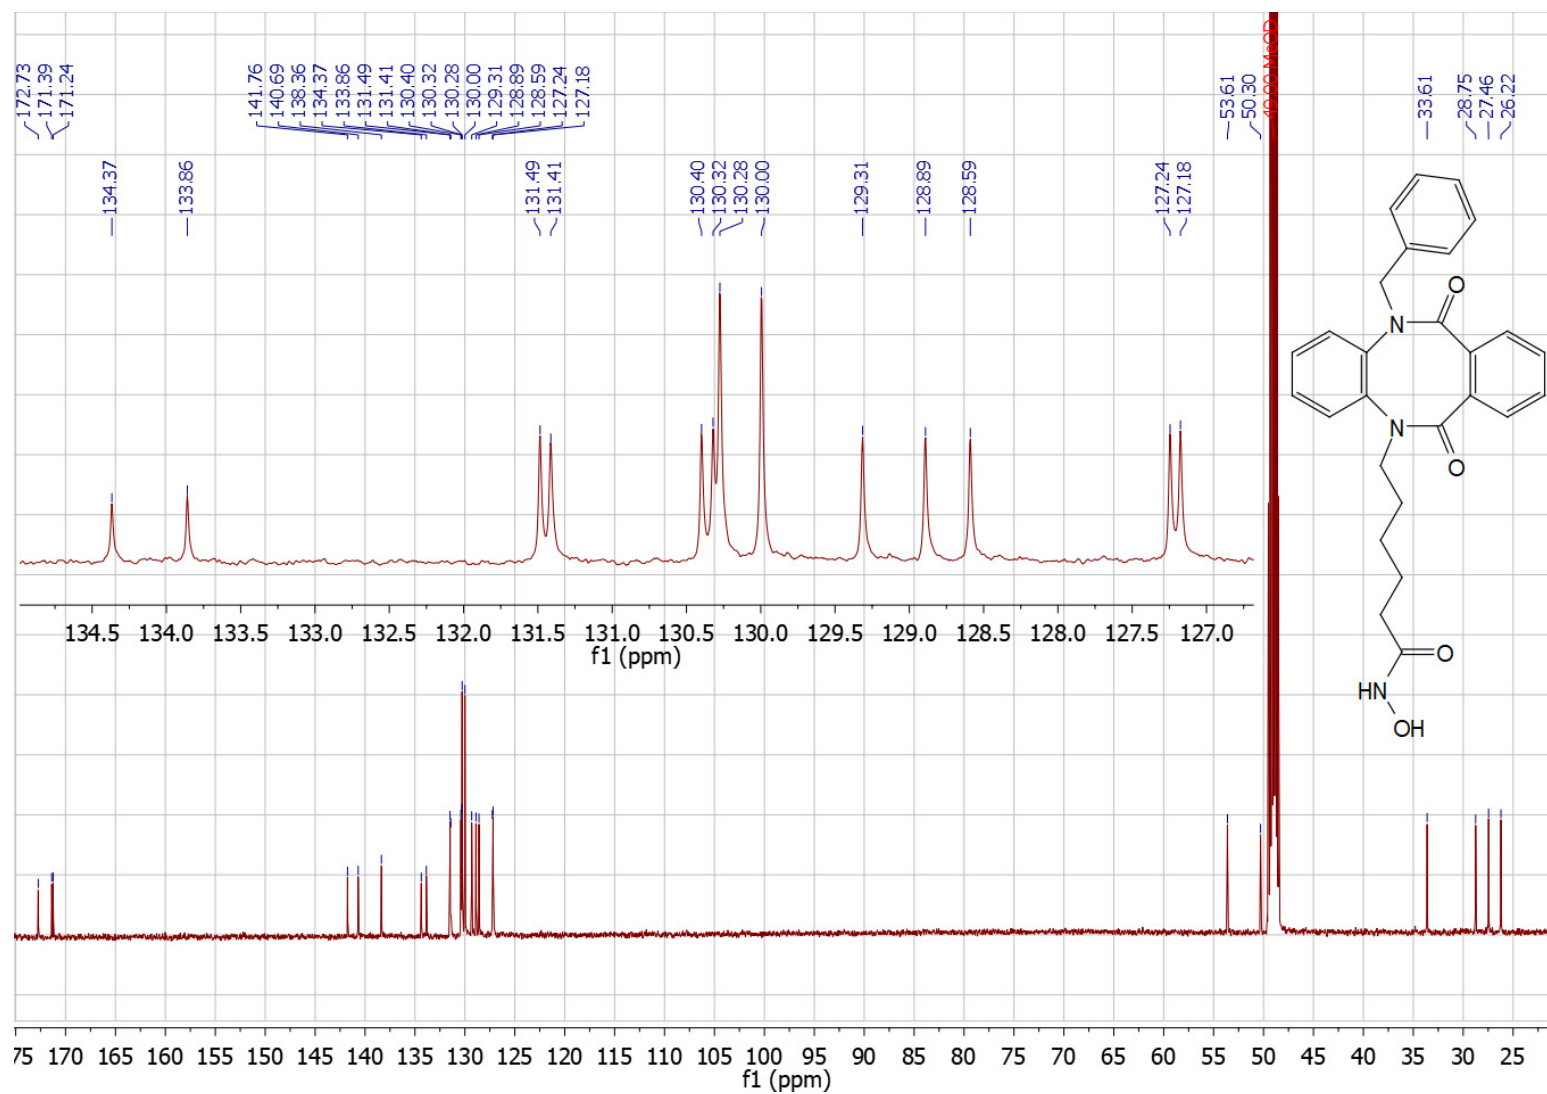

**Figure S72.** <sup>13</sup>C NMR spectrum of *N*-hydroxy-6-(12-benzyl-6,11-dioxo-11,12-dihydrodibenzo[*b,f*][1,4]diazocin-5(6*H*)-yl)hexanamide (**7o**).

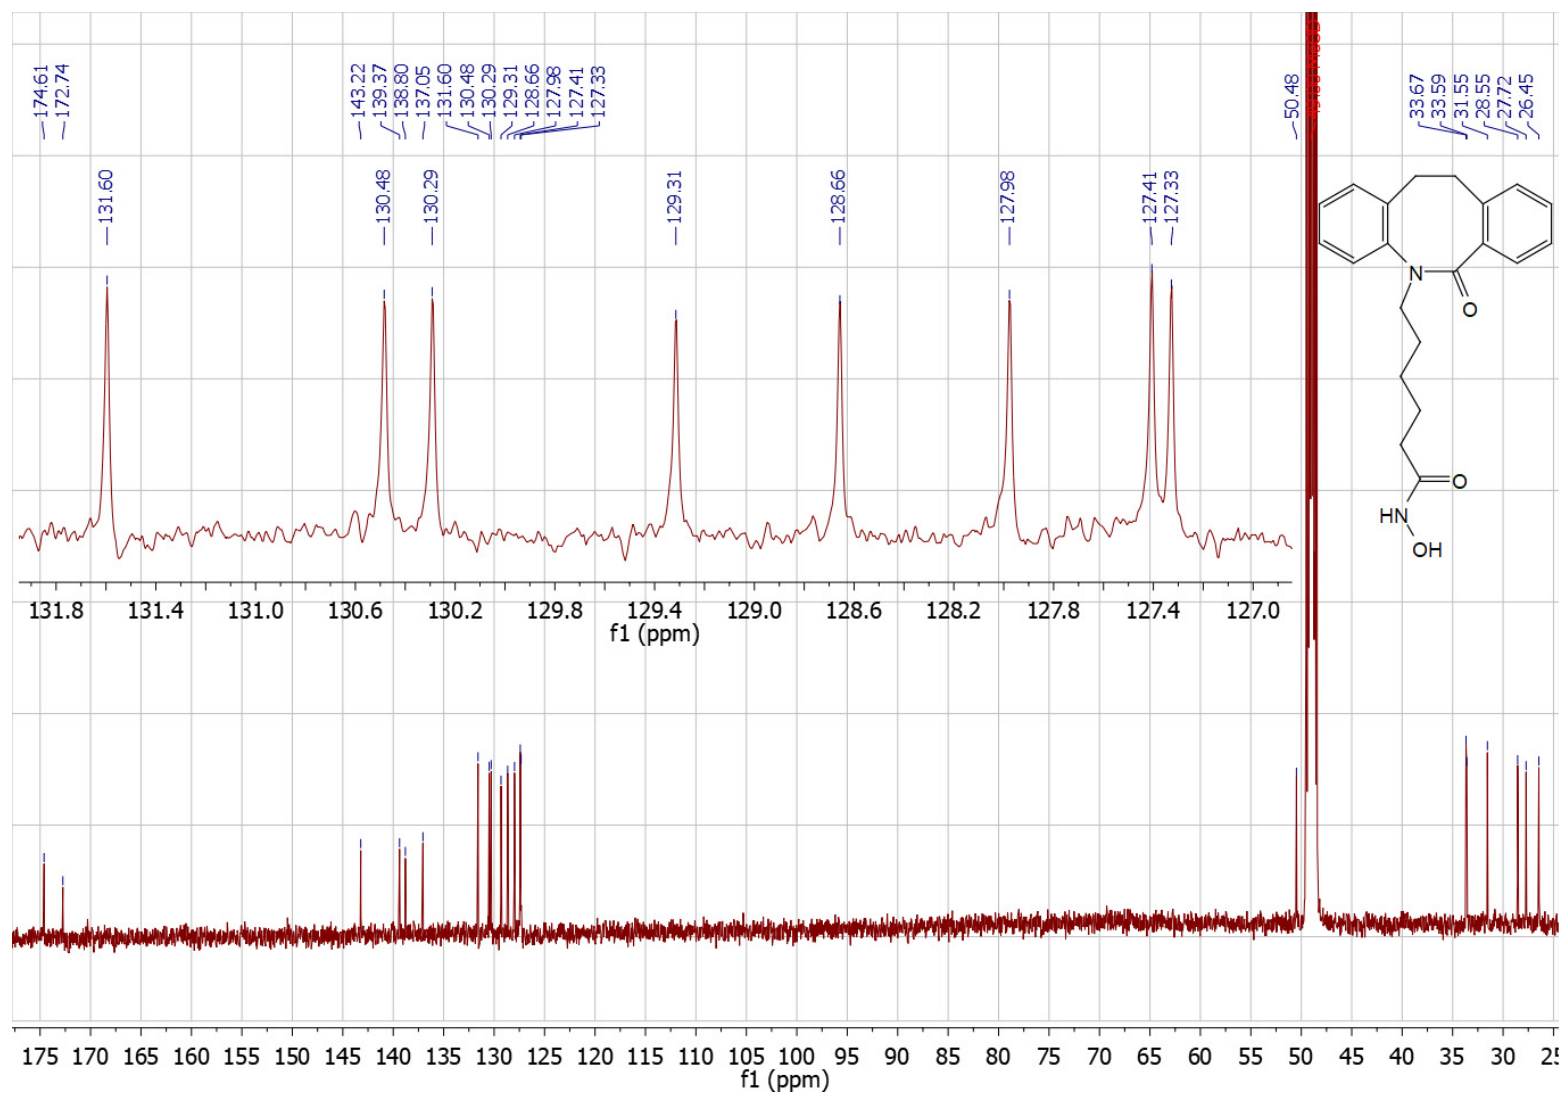

**Figure S73.**  $^{13}\text{C}$  NMR spectrum of *N*-hydroxy-6-(6-oxo-11,12-dihydrodibenzo[*b,f*]azocin-5(6*H*)-yl)hexanamide (7p).

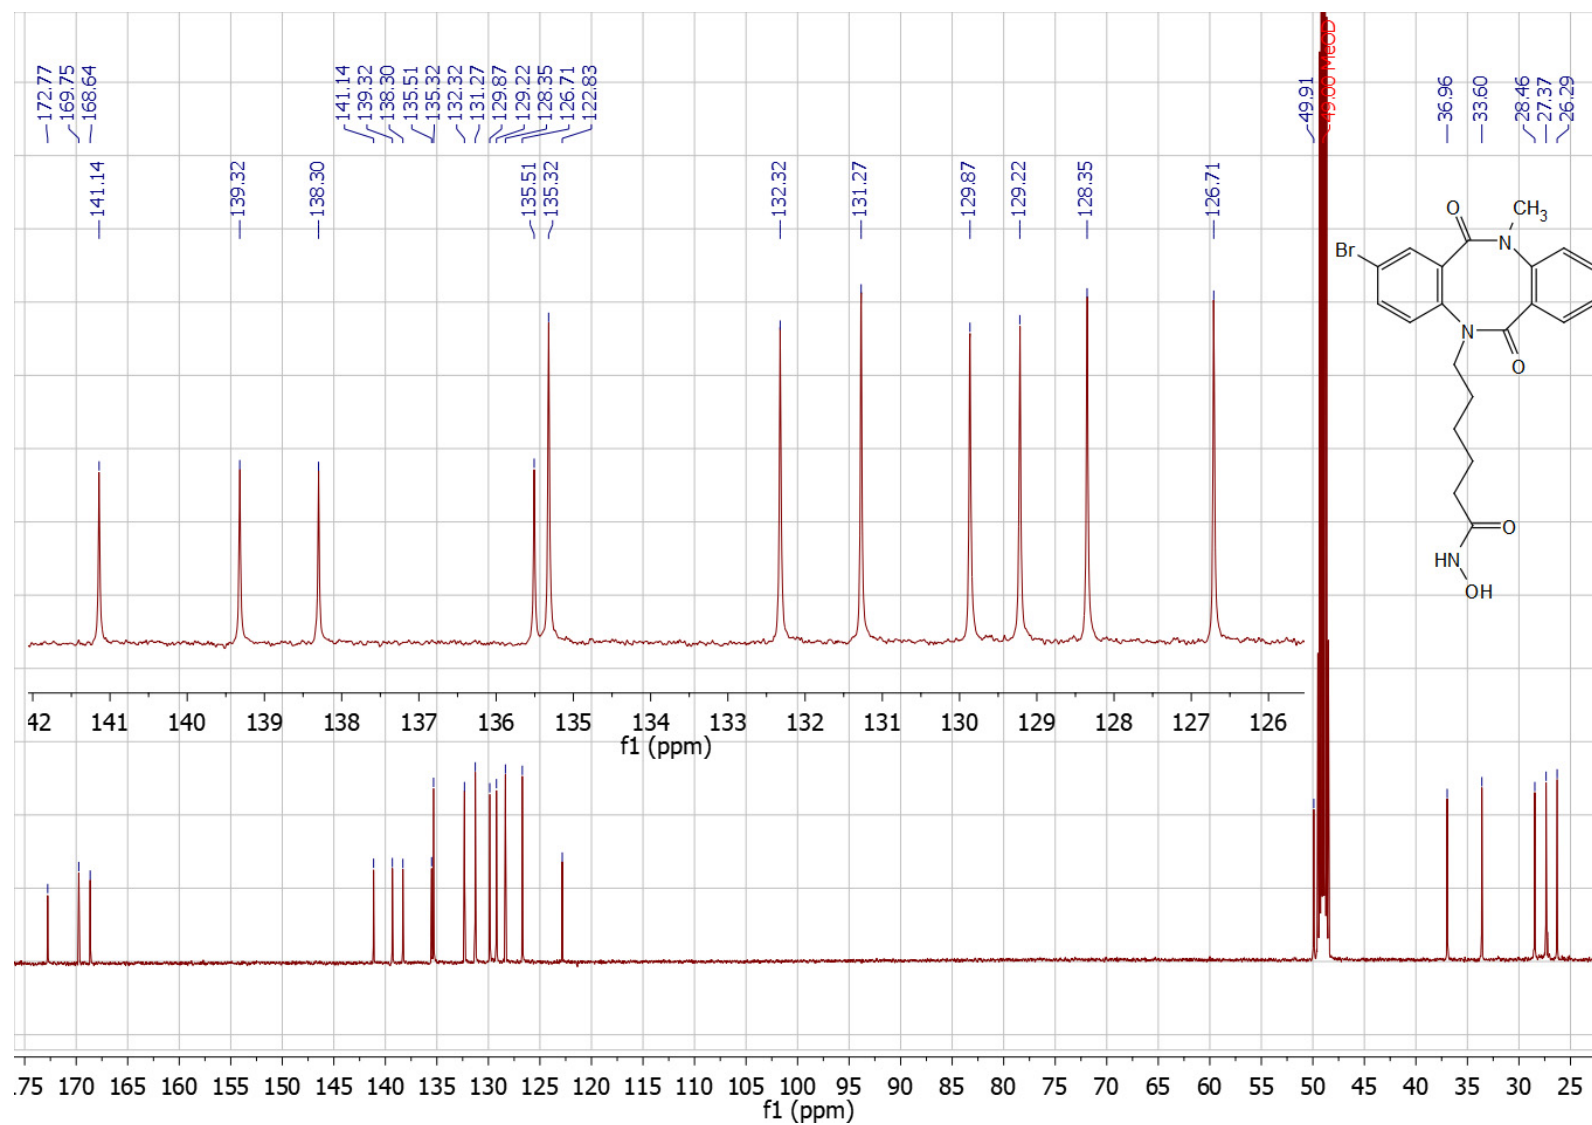

**Figure S74.**  $^{13}\text{C}$  NMR spectrum of *N*-hydroxy-6-(2-bromo-11-methyl-6,12-dioxo-11,12-dihydrodibenzo[*b,f*][1,5]diazocin-5(6*H*)-yl)hexanamide (**7r**).

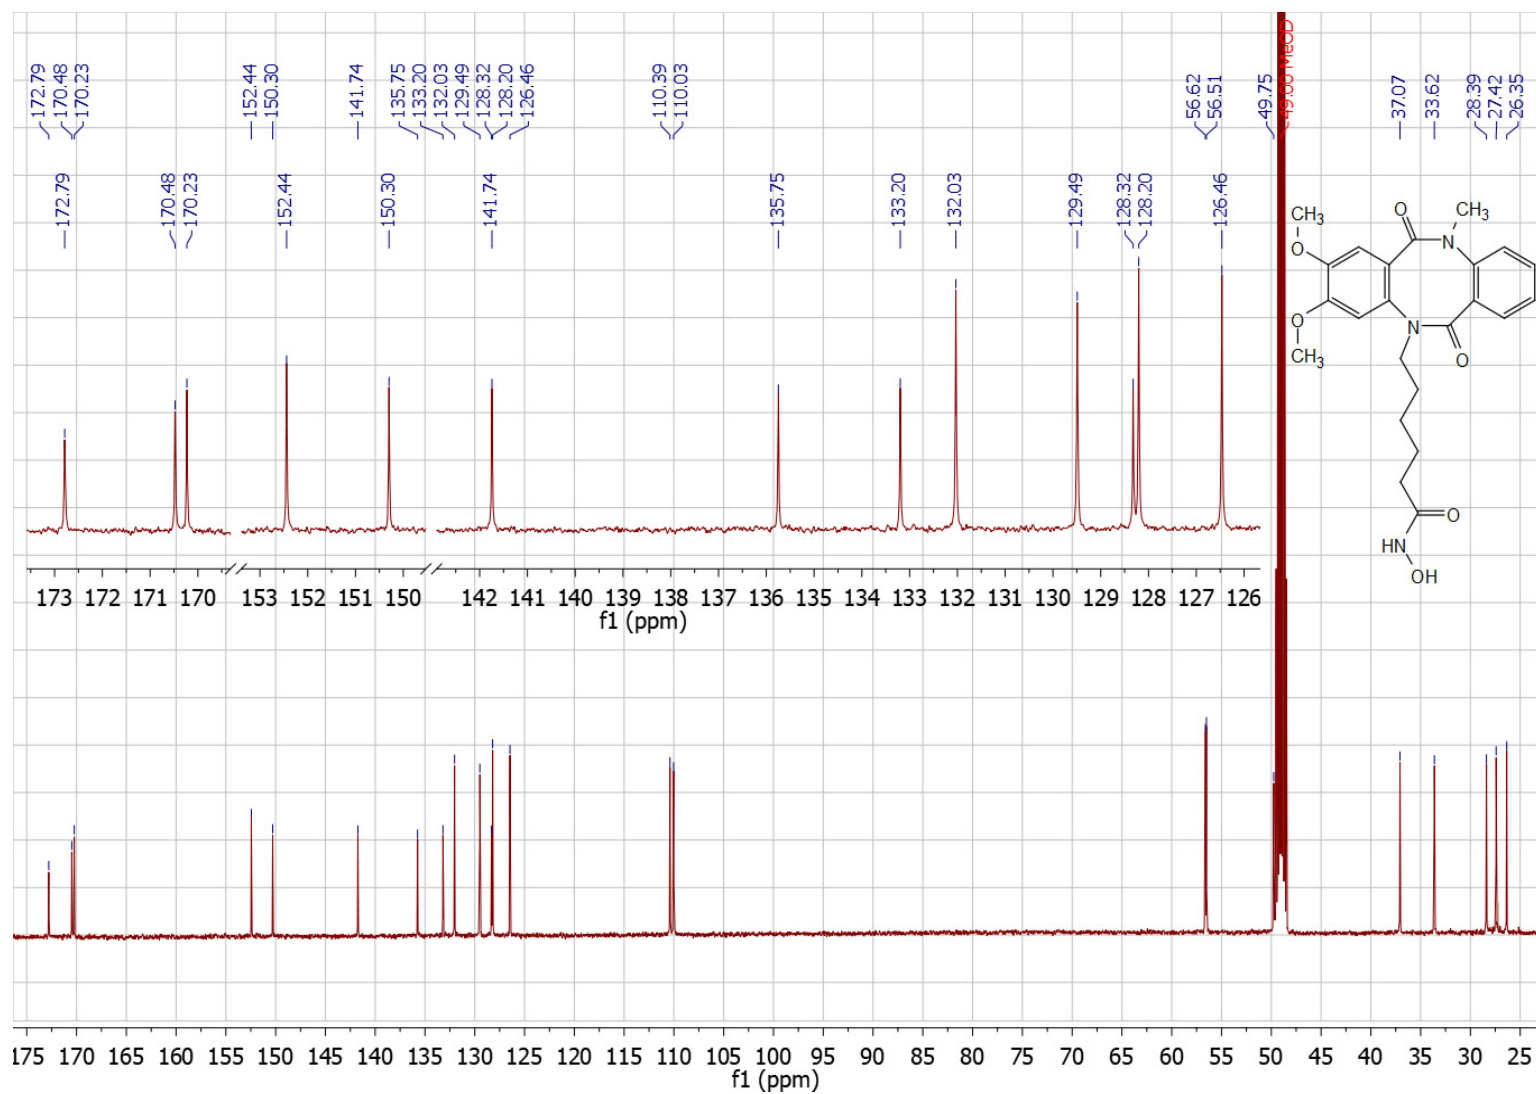

**Figure S75.** <sup>13</sup>C NMR spectrum of *N*-hydroxy-6-(2,3-dimethoxy-11-methyl-6,12-dioxo-11,12-dihydrodibenzo[*b,f*][1,5]diazocin-5(6*H*)-yl)hexanamide (**7s**).

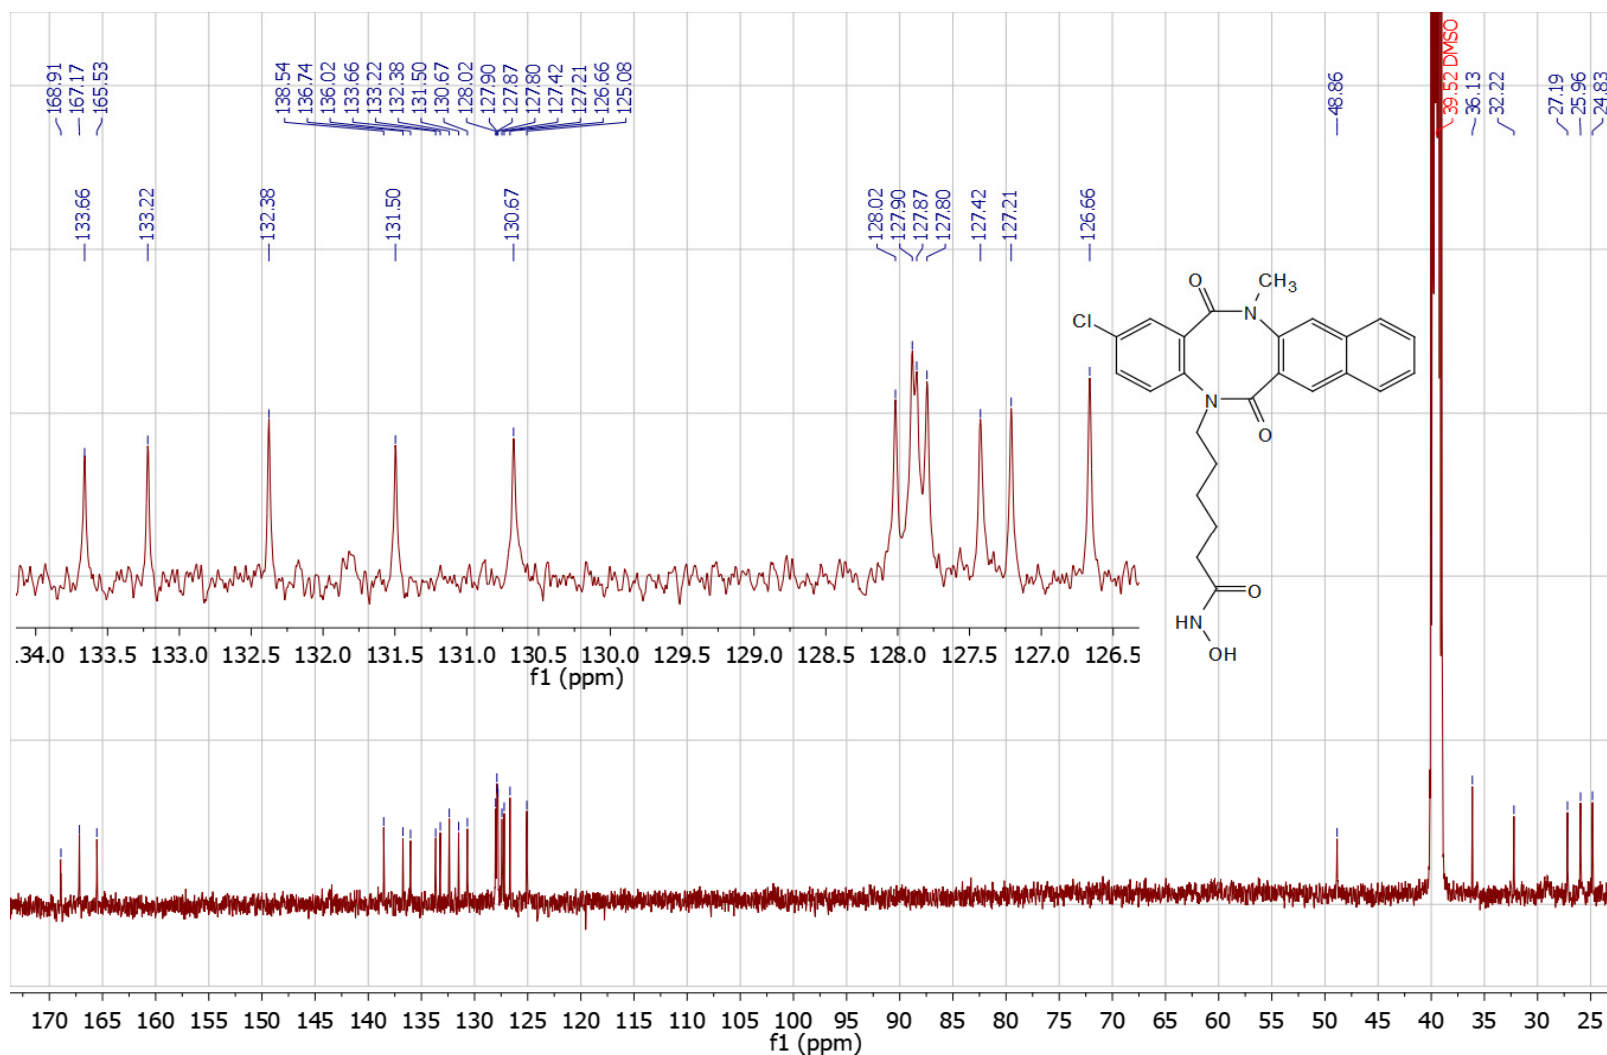

**Figure S76.** <sup>13</sup>C NMR spectrum of *N*-hydroxy-6-(5-methyl-6,14-dioxo-5,14-dihydrobenzonaphtho[2,3-*f*][1,5]diazocin-13(6*H*)-yl)hexanamide (**7t**).

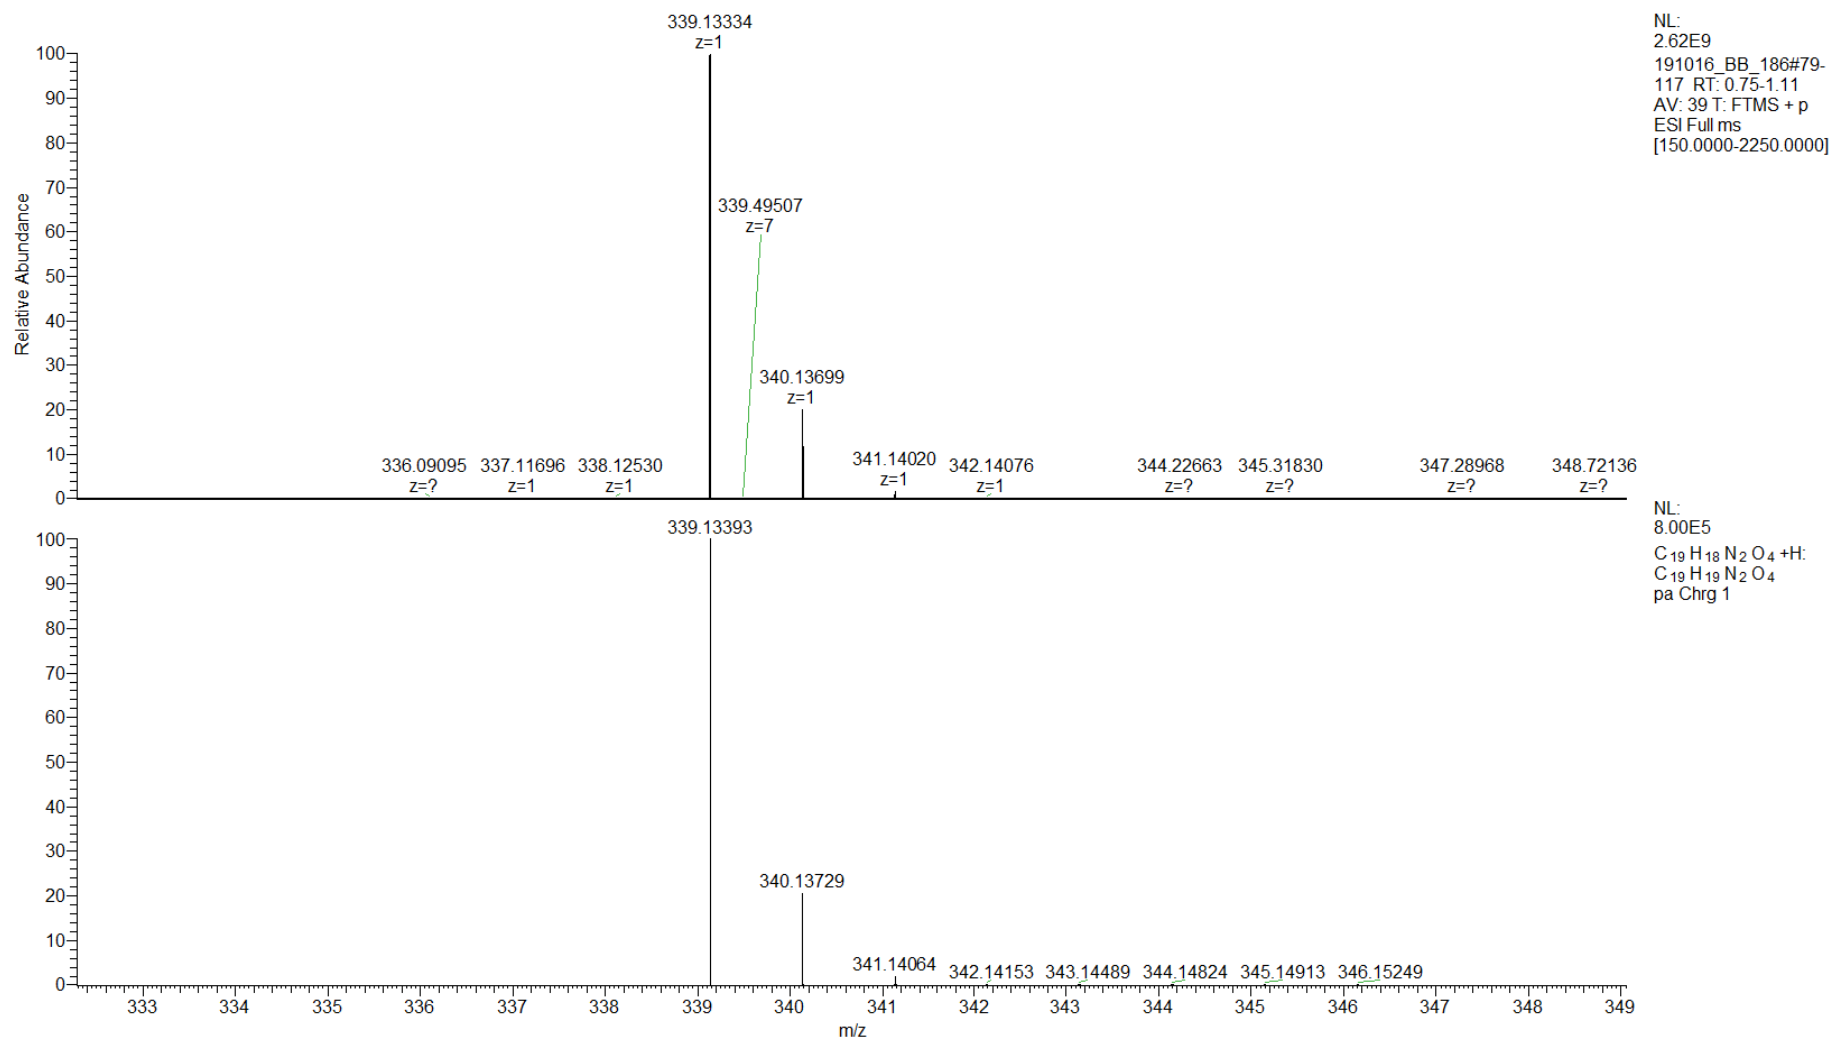

**Figure S77.** ESI HRMS spectrum of ethyl 2-(11-methyl-6,12-dioxo-11,12-dihydrodibenzo[*b,f*][1,5]diazocin-5(6*H*)-yl)acetate (**10a**).

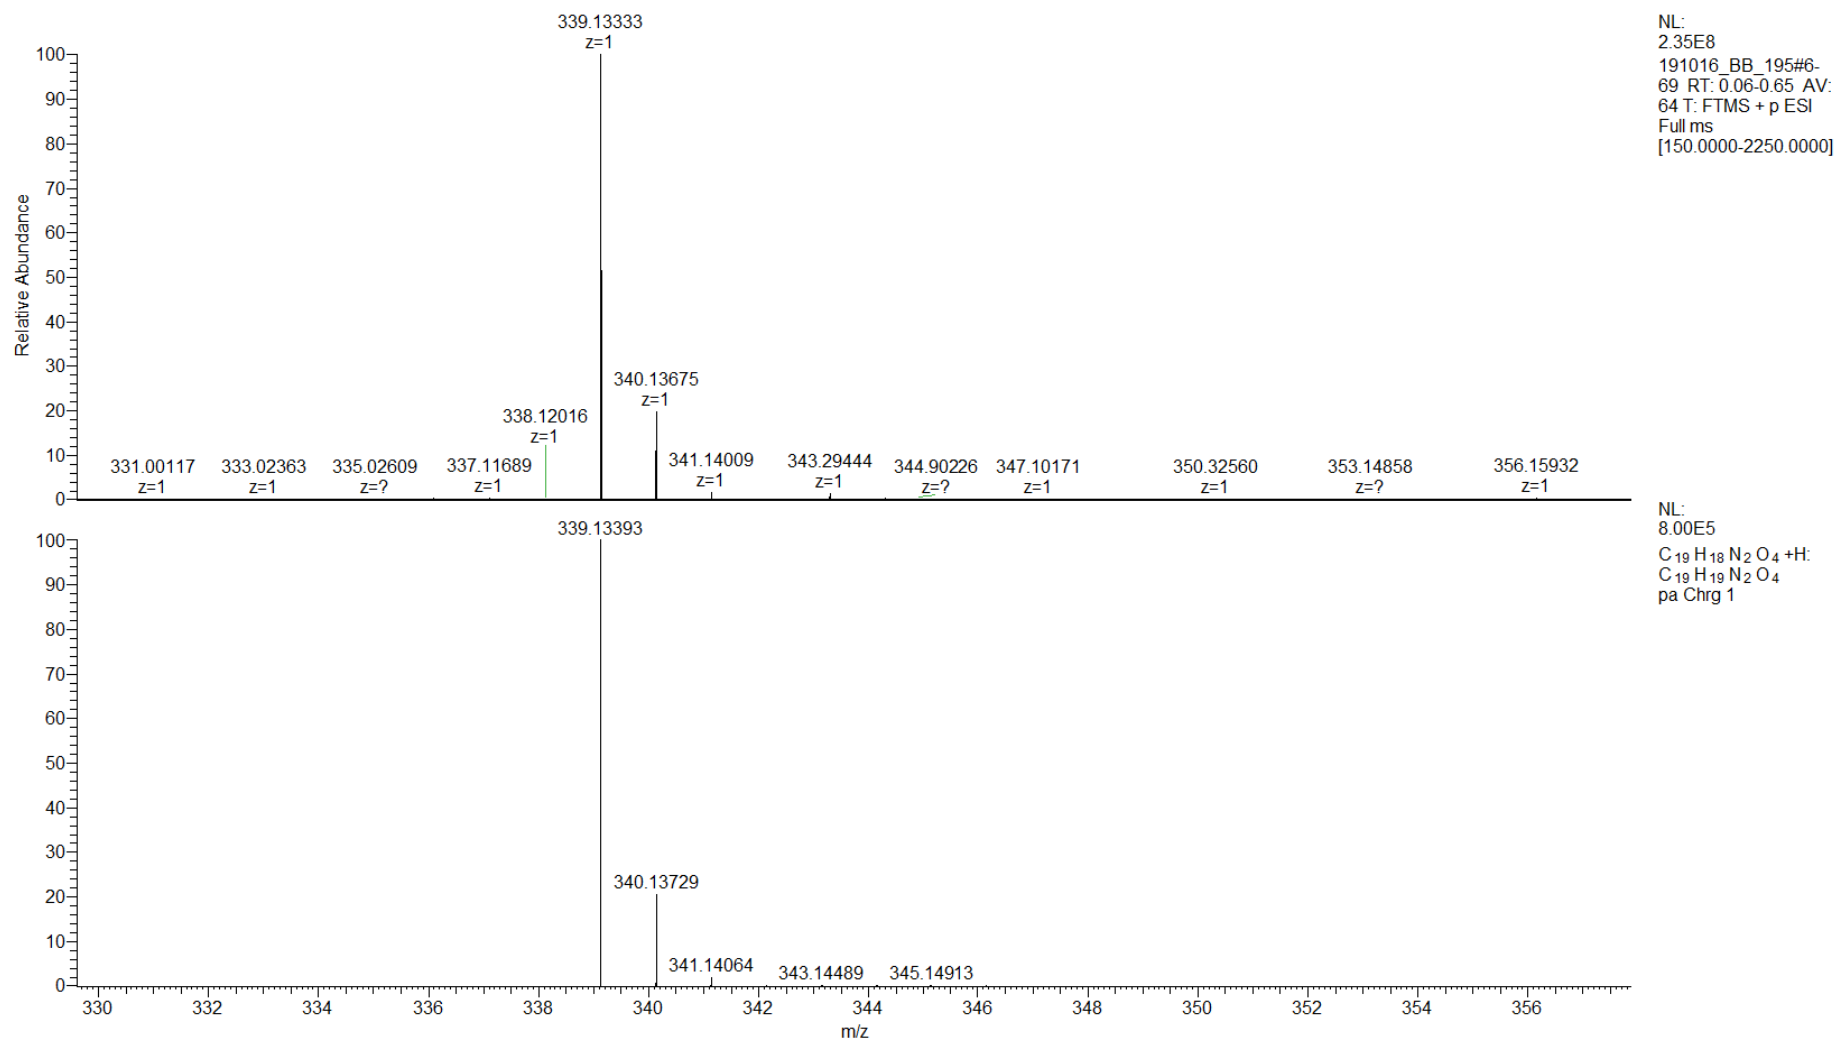

**Figure S78.** ESI HRMS spectrum of ethyl 3-(11-methyl-6,12-dioxo-11,12-dihydrodibenzo[*b,f*][1,5]diazocin-5(6*H*)-yl)propanoate (**10b**).

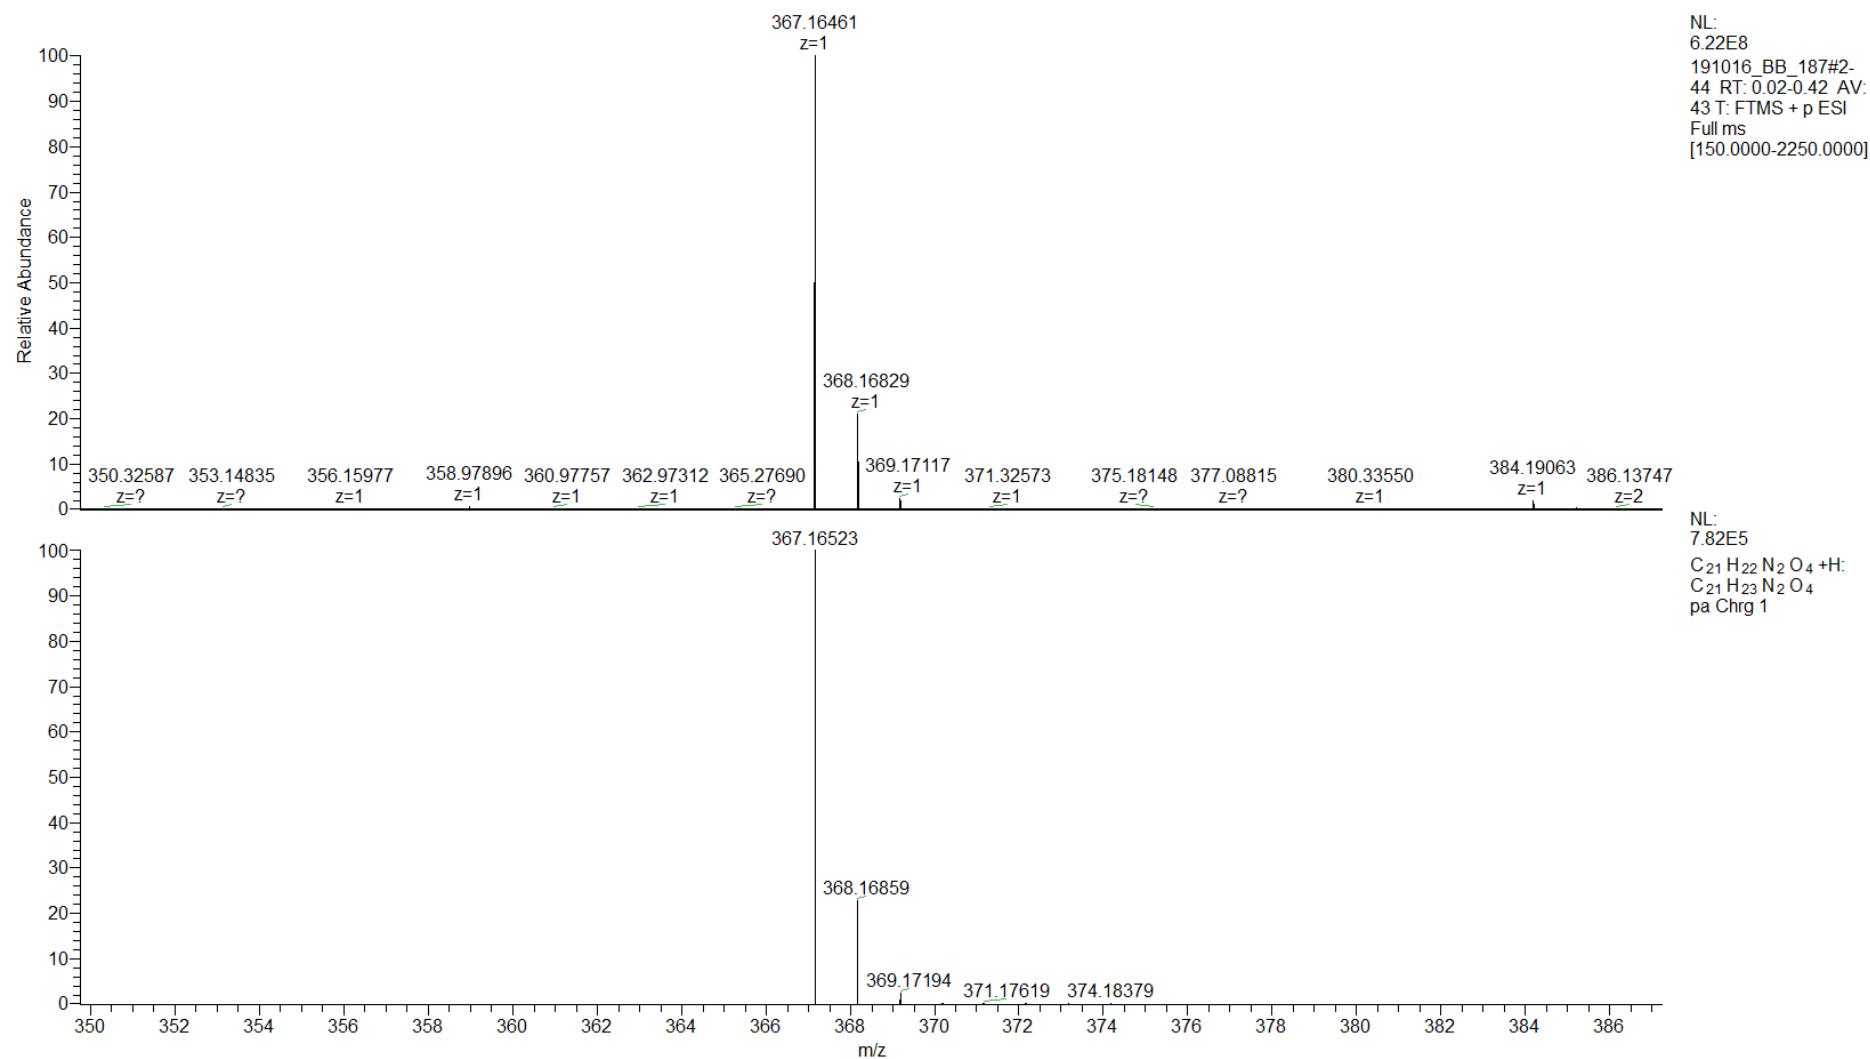

**Figure S79.** ESI HRMS spectrum of ethyl 4-(11-methyl-6,12-dioxo-11,12-dihydrodibenzo[*b,f*][1,5]diazocin-5(6*H*)-yl)butanoate (**10c**).

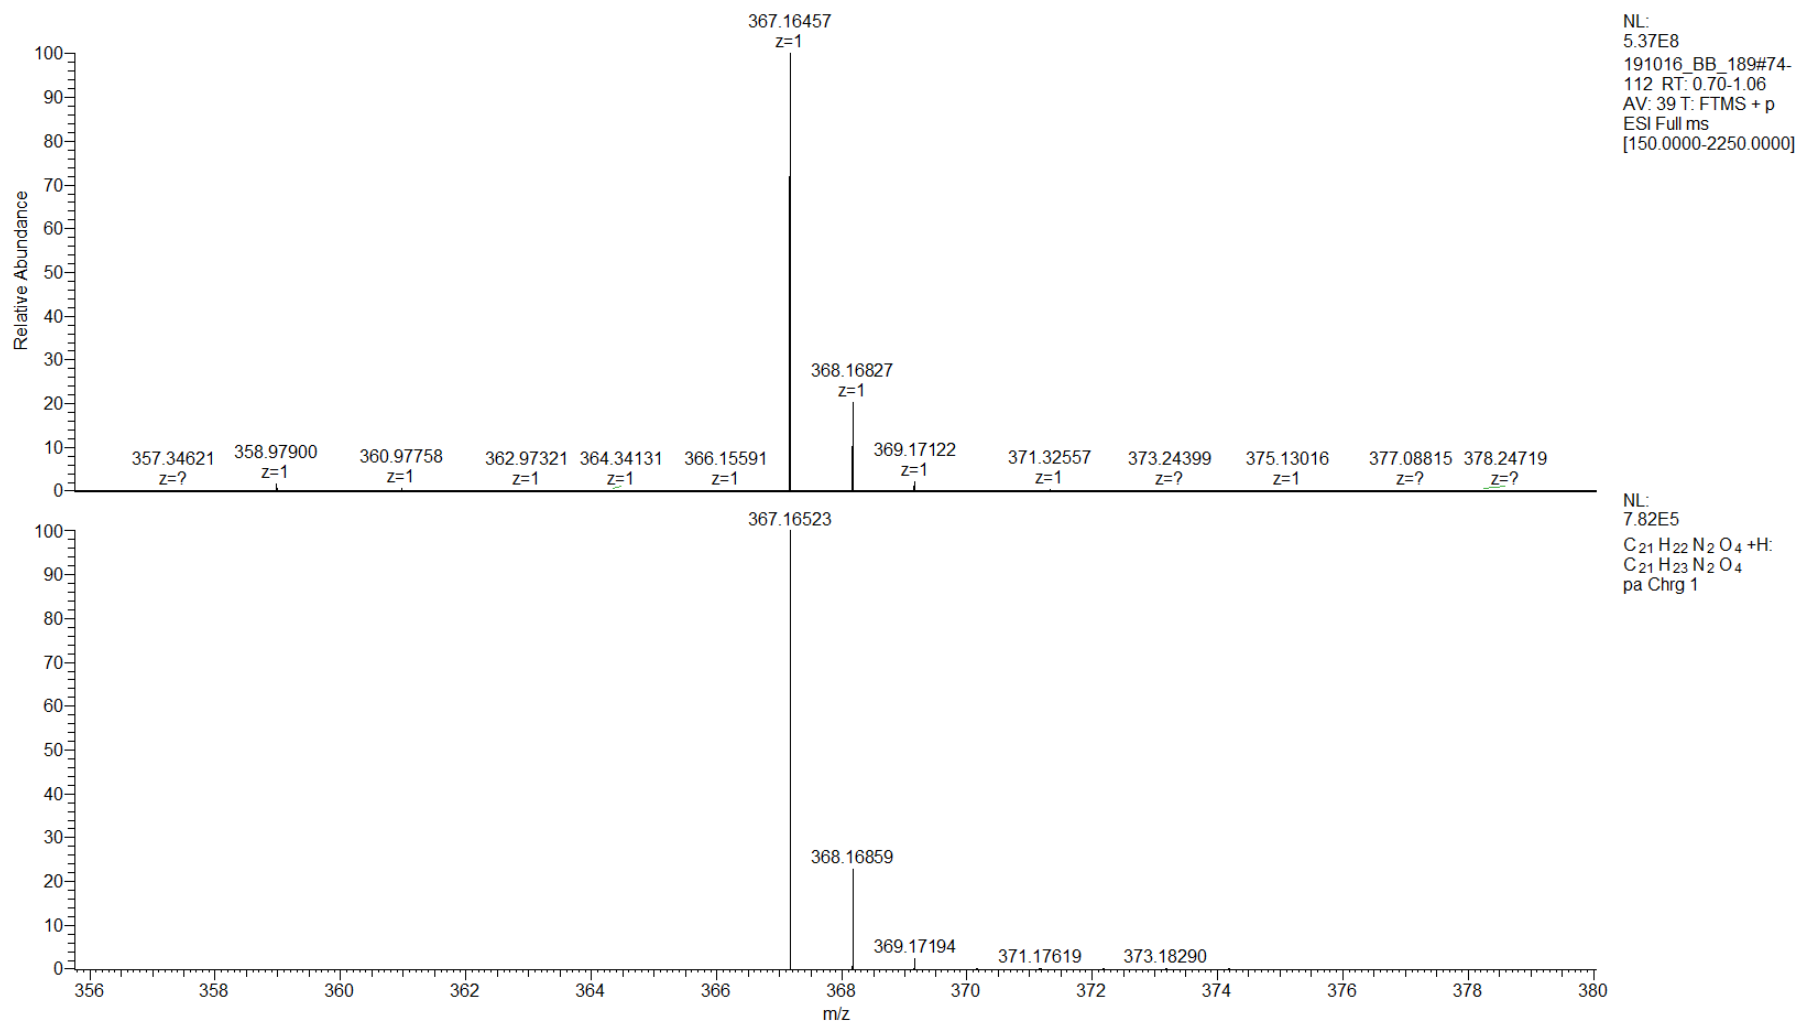

**Figure S80.** ESI HRMS spectrum of methyl 5-(11-methyl-6,12-dioxo-11,12-dihydrodibenzo[*b,f*][1,5]diazocin-5(6*H*)-yl)pentanoate (**10d**).

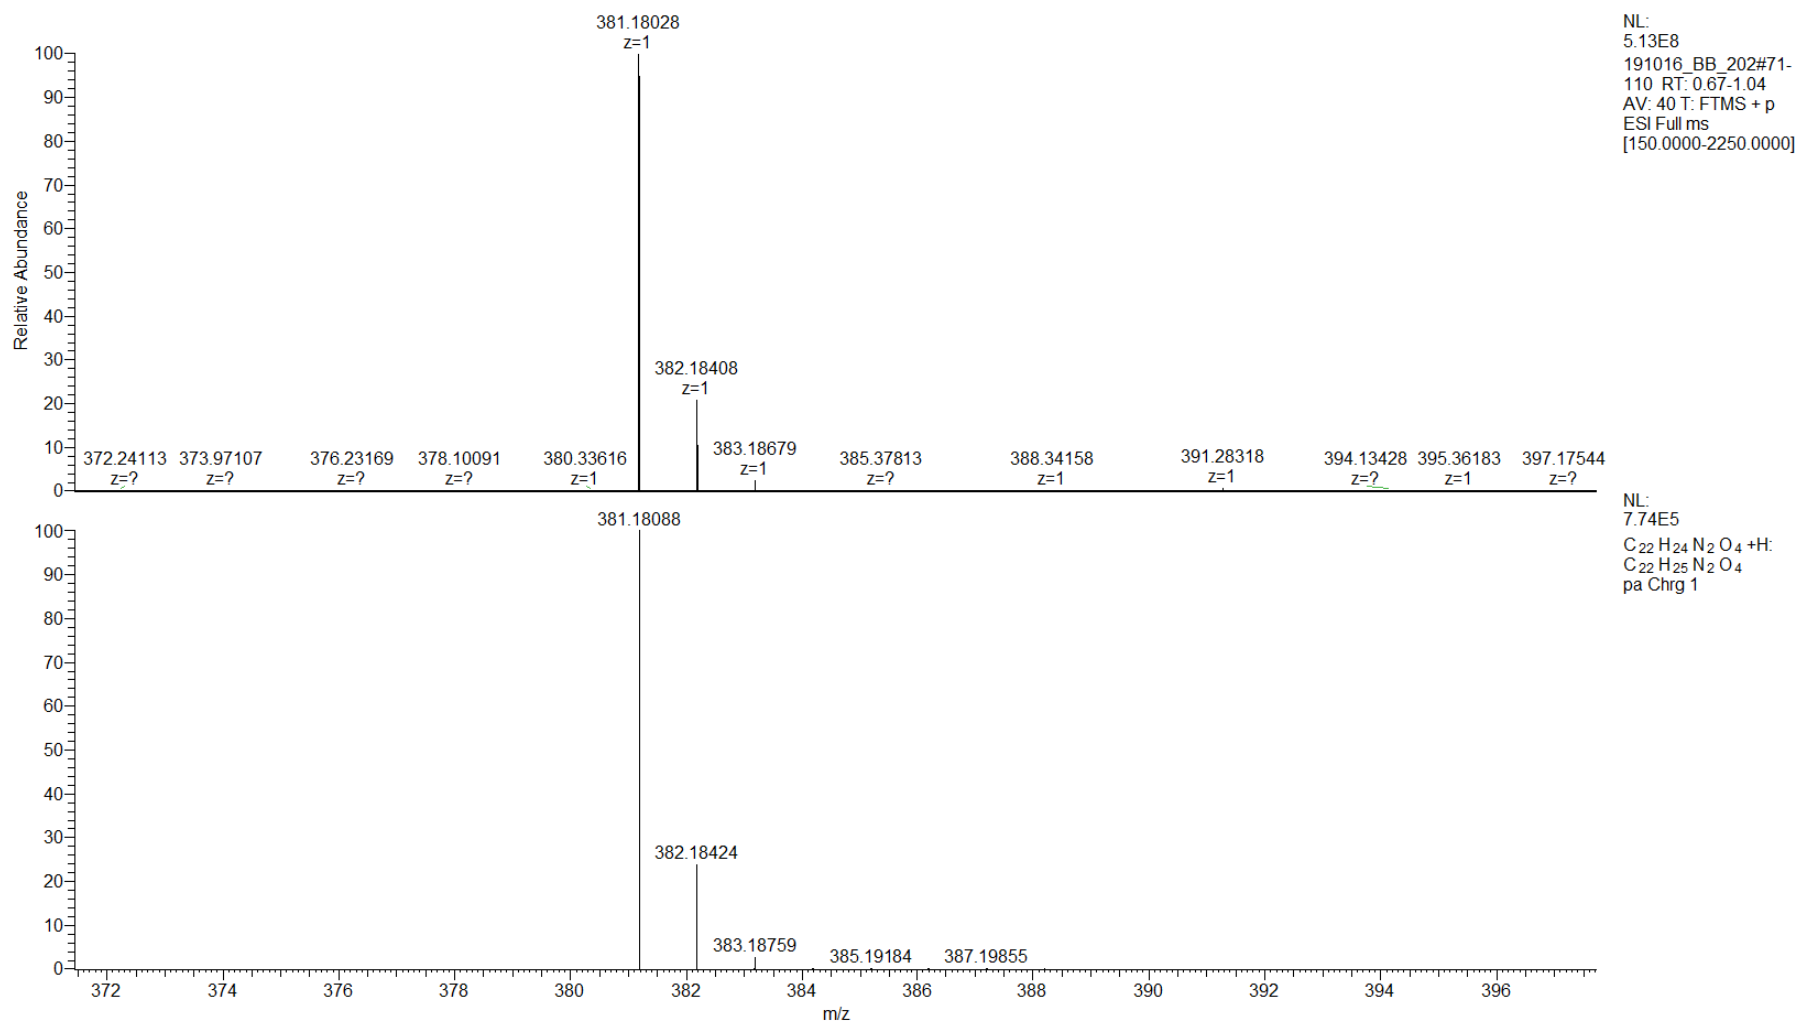

**Figure S81.** ESI HRMS spectrum of methyl 6-(11-methyl-6,12-dioxo-11,12-dihydrodibenzo[*b,f*][1,5]diazocin-5(6*H*)-yl)hexanoate (**10e**).

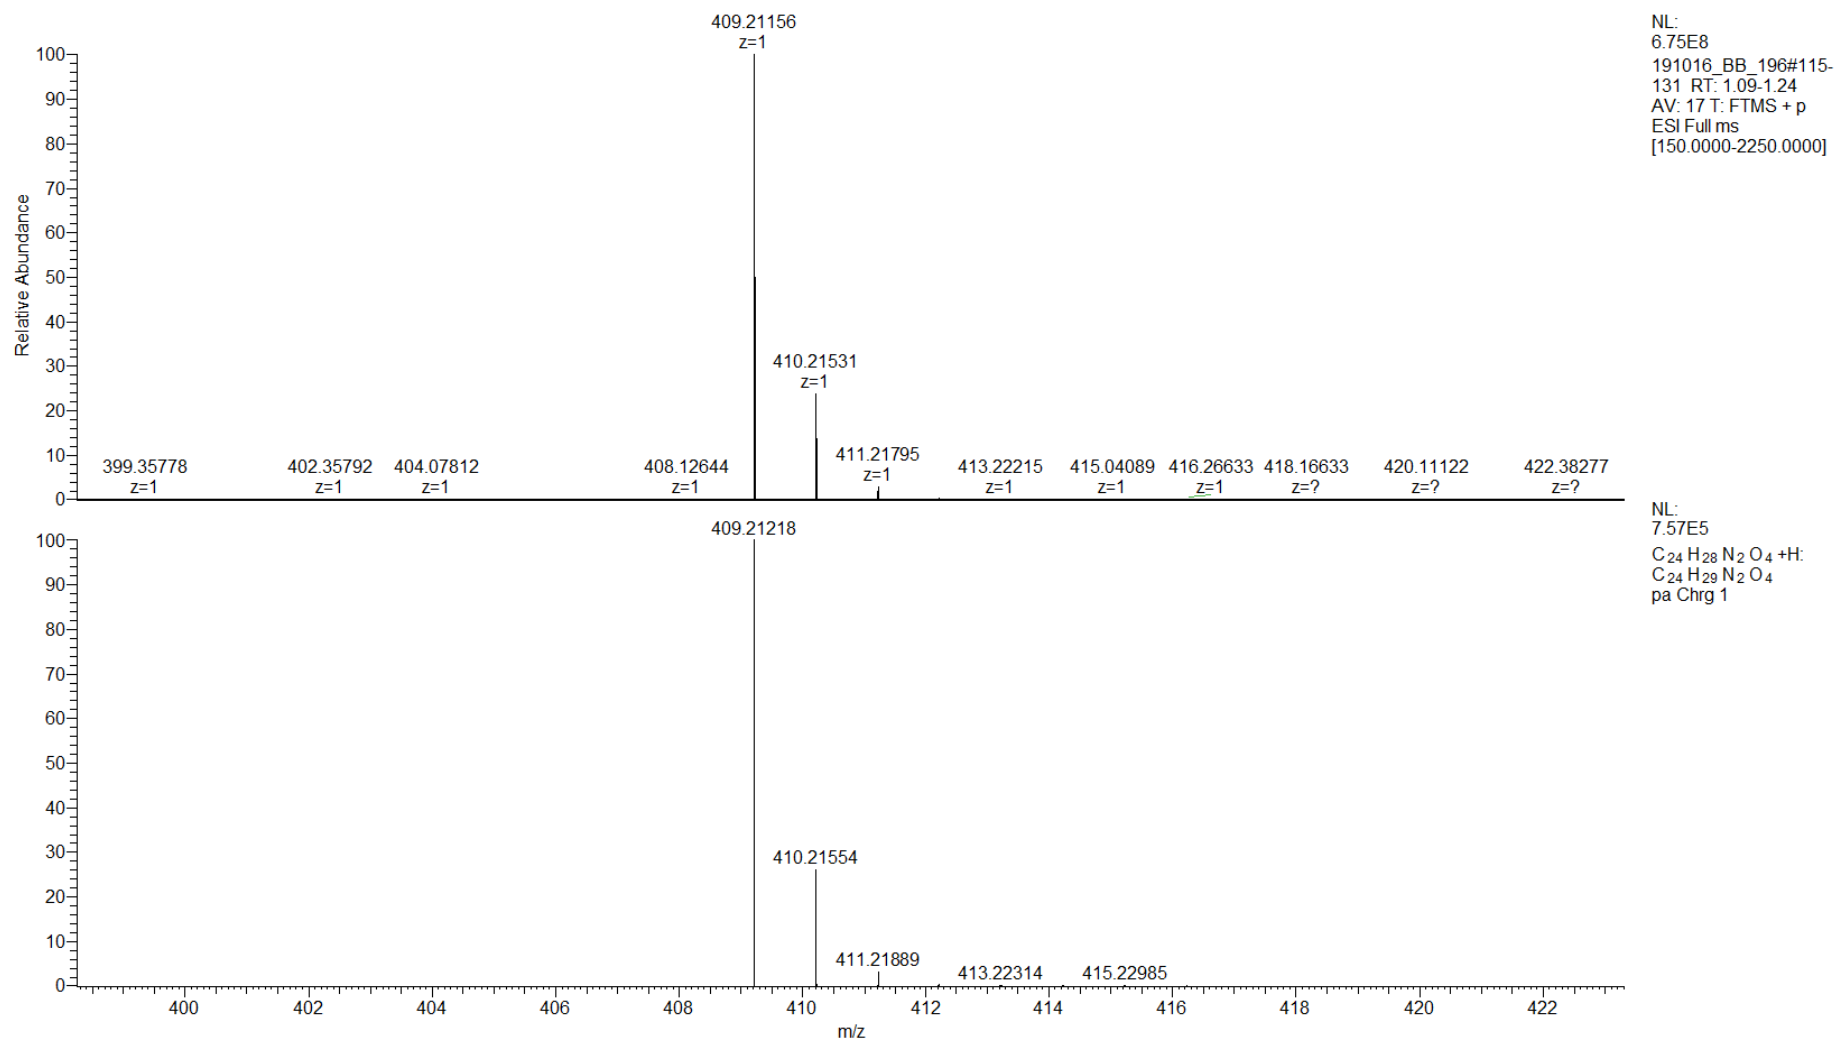

**Figure S82.** ESI HRMS spectrum of ethyl 7-(11-methyl-6,12-dioxo-11,12-dihydrodibenzo[*b,f*][1,5]diazocin-5(6*H*)-yl)heptanoate (**10f**).

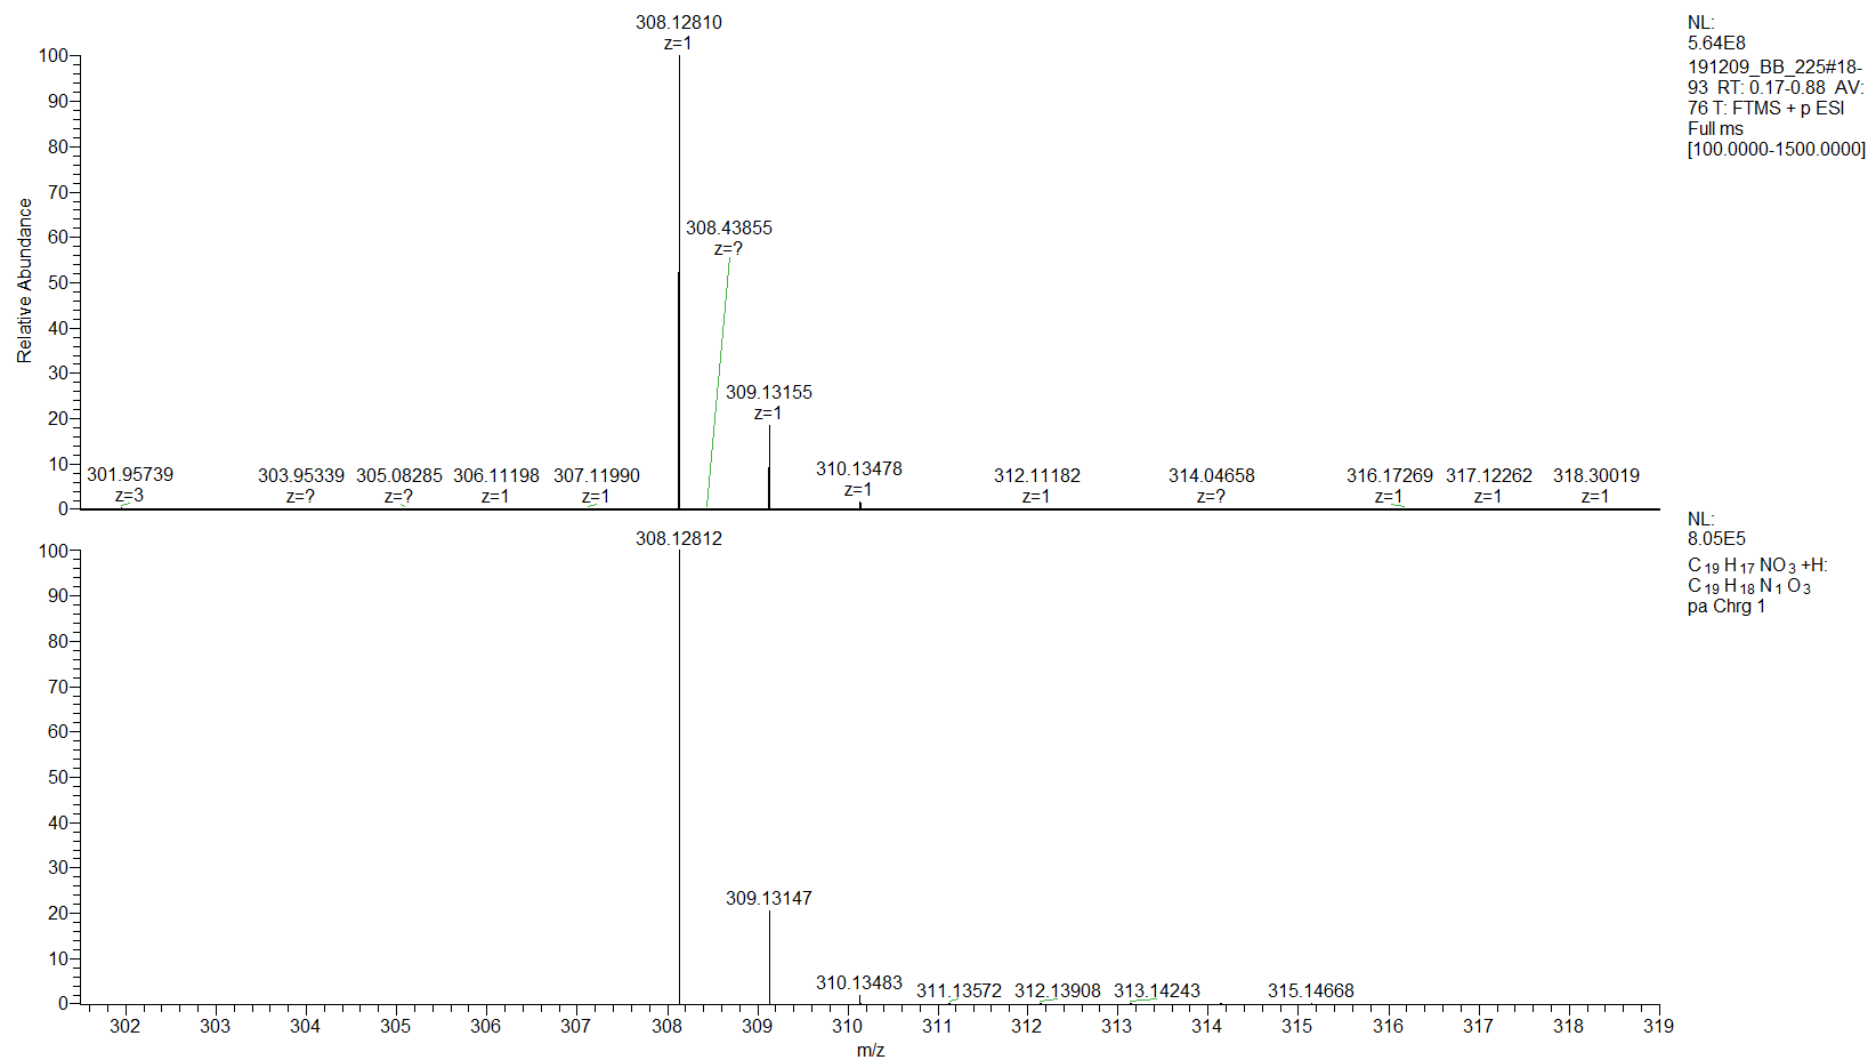

**Figure S83.** ESI HRMS spectrum of ethyl 2-(6-oxodibenzo[*b,f*]azocin-5(6*H*)-yl)acetate (**10g**).

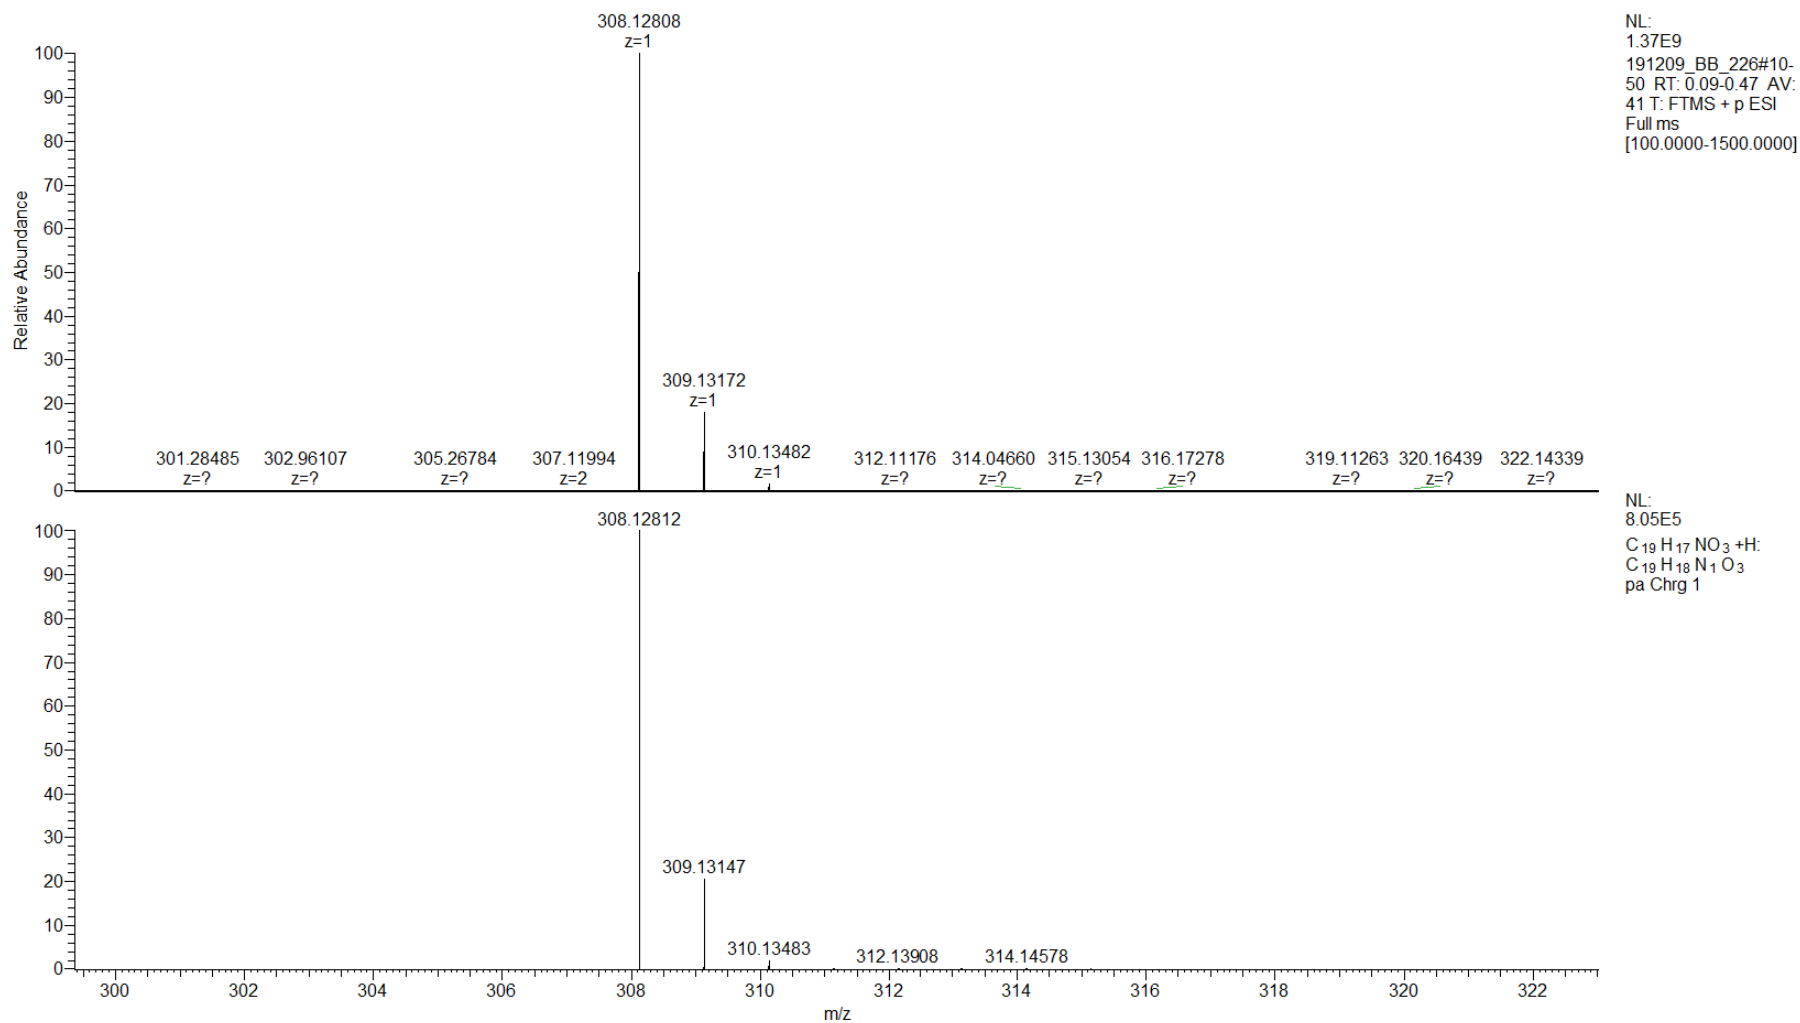

**Figure S84.** ESI HRMS spectrum of methyl 3-(6-oxodibenzo[*b,f*]azocin-5(6*H*)-yl)propanoate (**10h**).

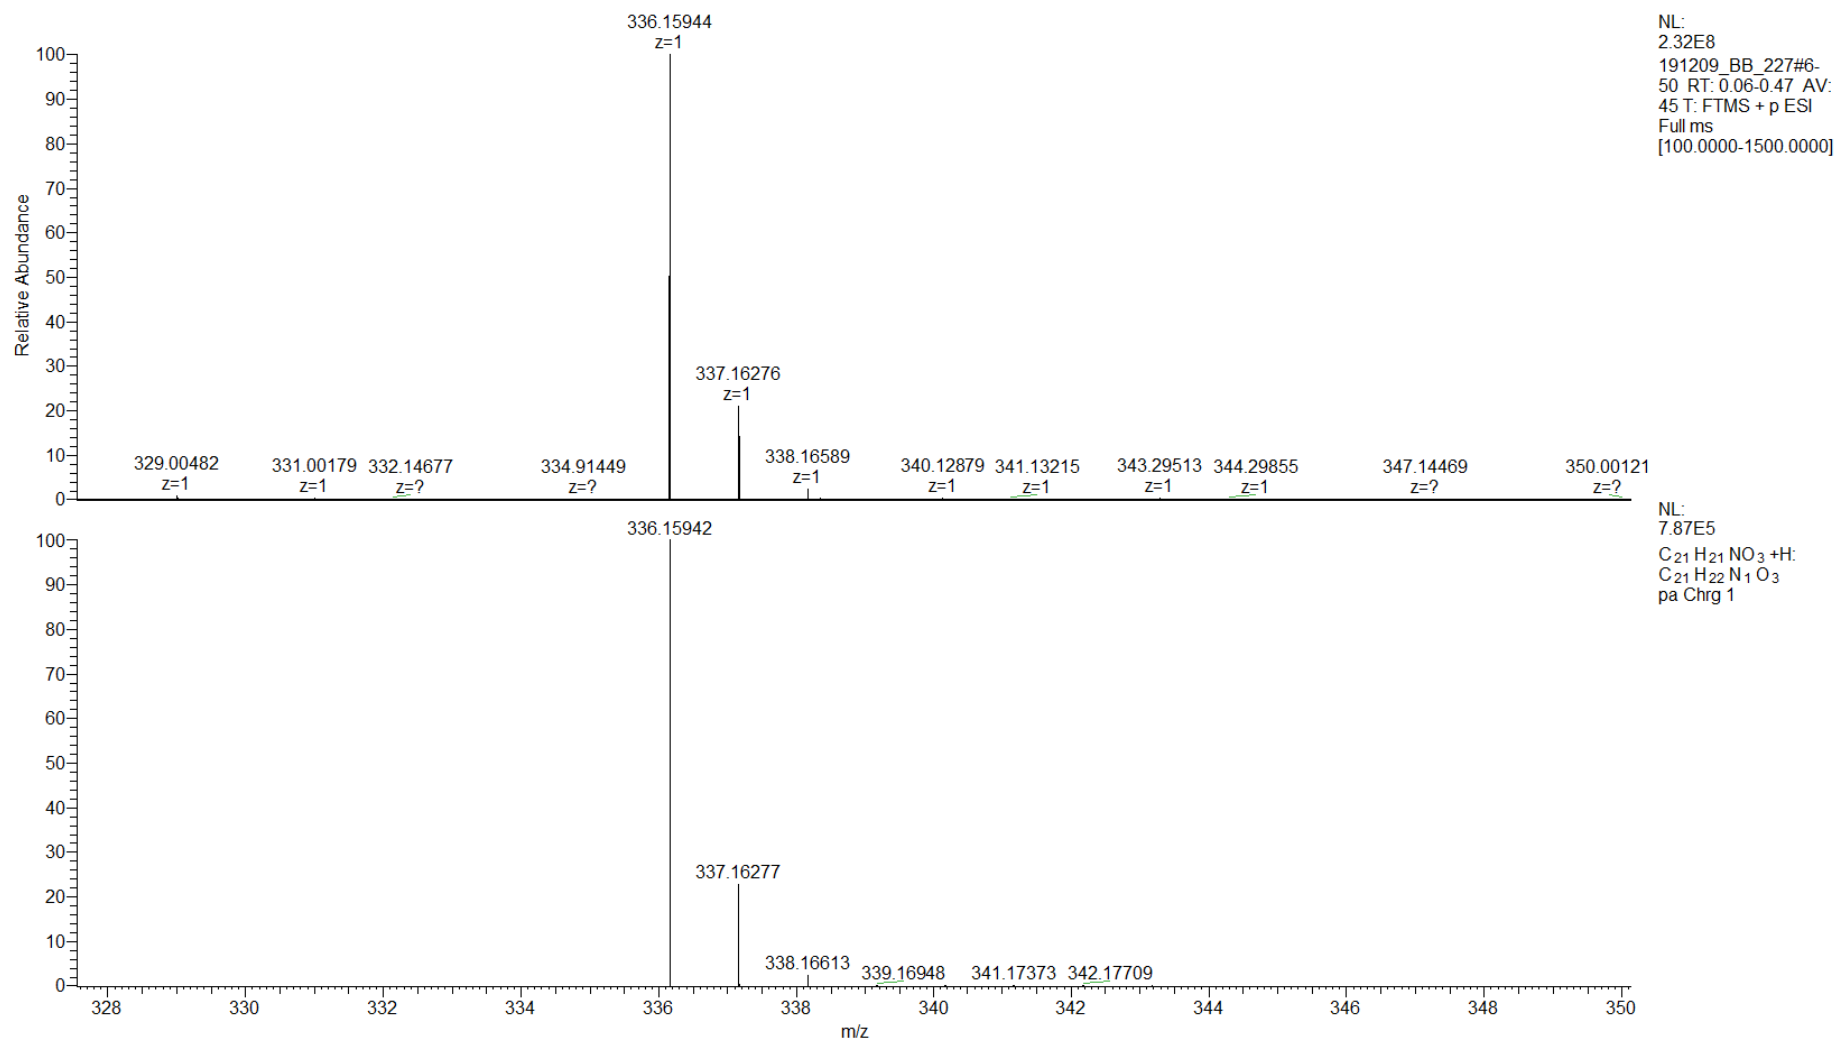

**Figure S85.** ESI HRMS spectrum of ethyl 4-(6-oxodibenzo[*b,f*]azocin-5(6*H*)-yl)butanoate (**10i**).

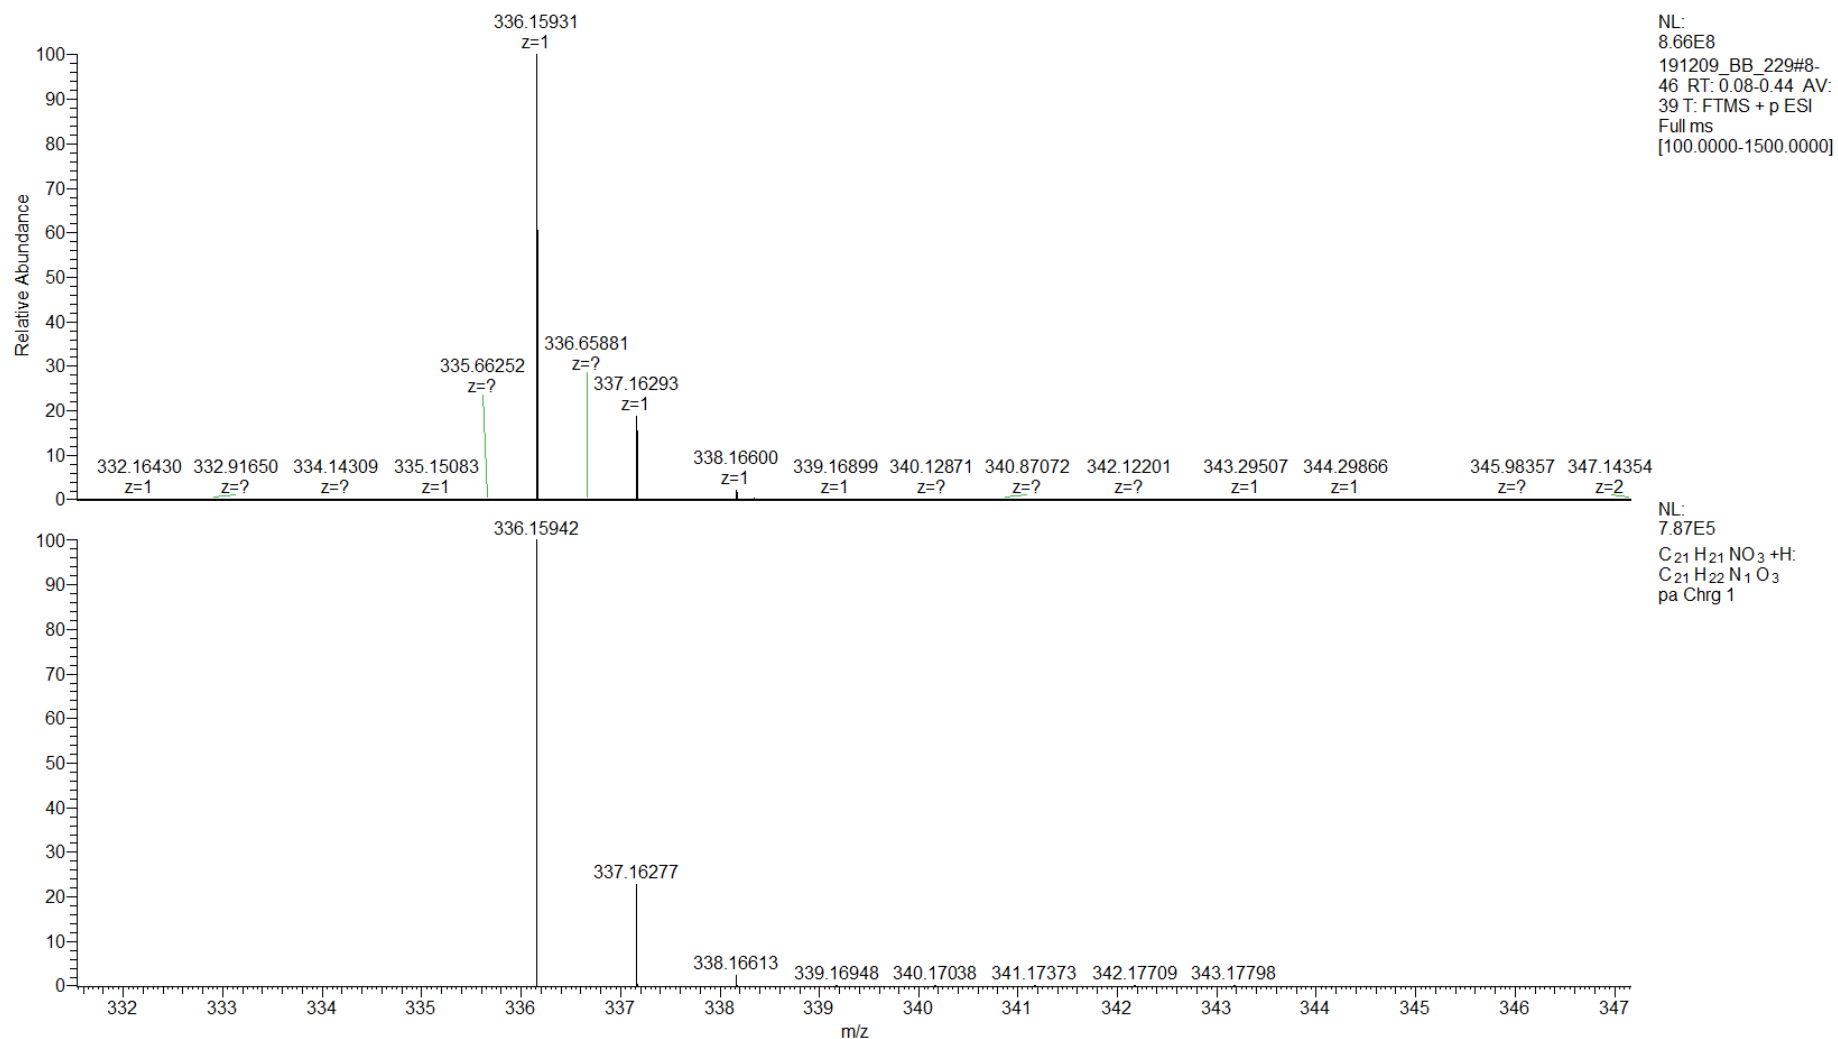

**Figure S86.** ESI HRMS spectrum of methyl 5-(6-oxodibenzo[*b,f*]azocin-5(6*H*)-yl)pentanoate (**10j**).

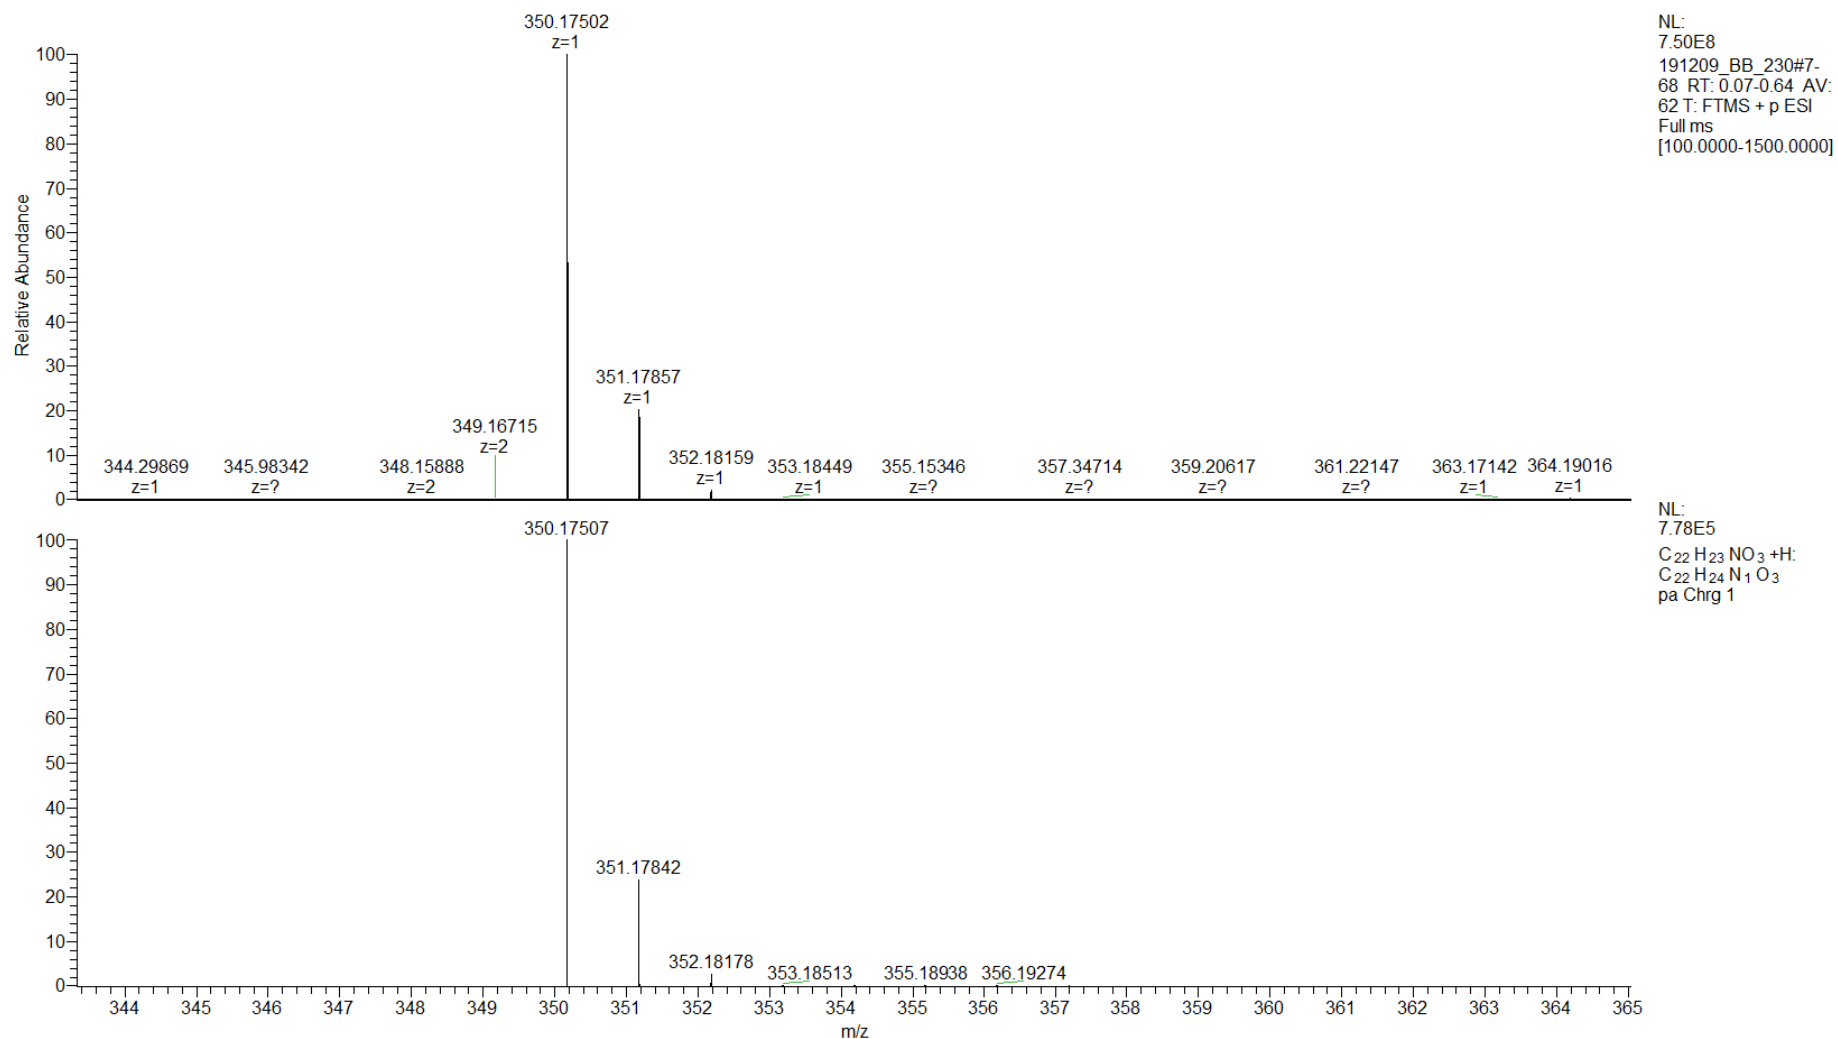

**Figure S87.** ESI HRMS spectrum of methyl 6-(6-oxodibenzo[*b,f*]azocin-5(6*H*)-yl)hexanoate (**10k**).

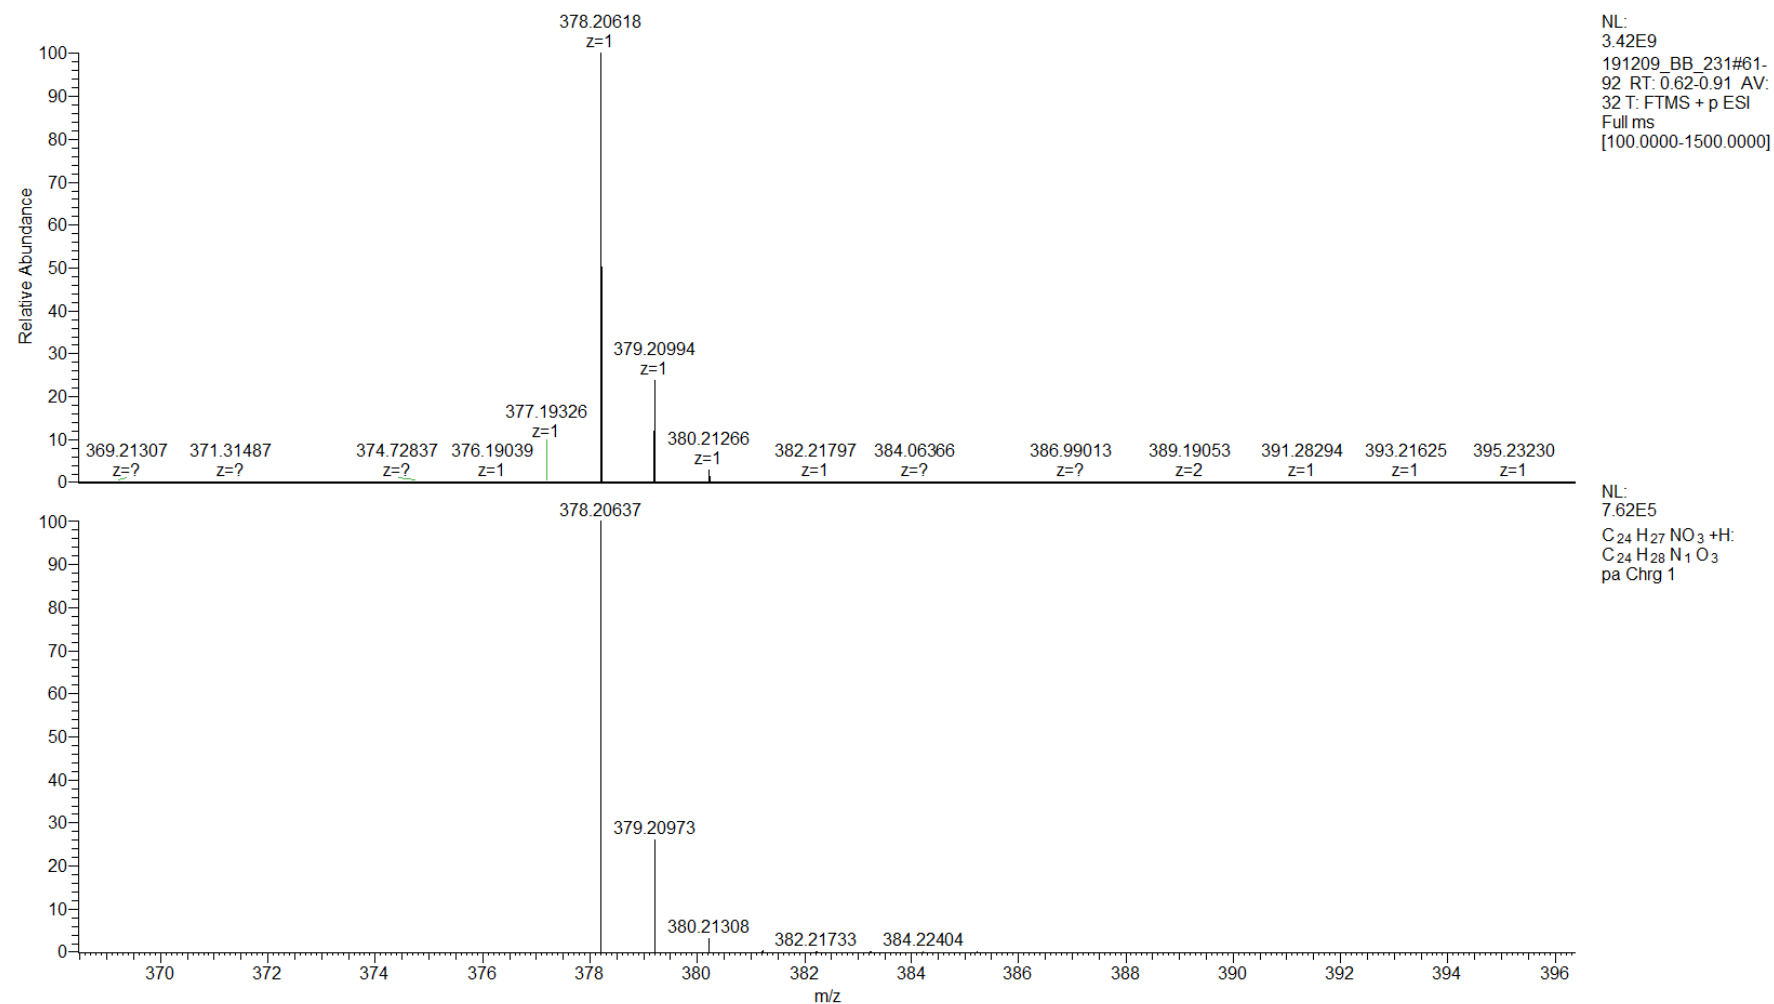

**Figure S88.** ESI HRMS spectrum of ethyl 7-(6-oxodibenzo[*b,f*]azocin-5(6*H*)-yl)heptanoate (**101**).

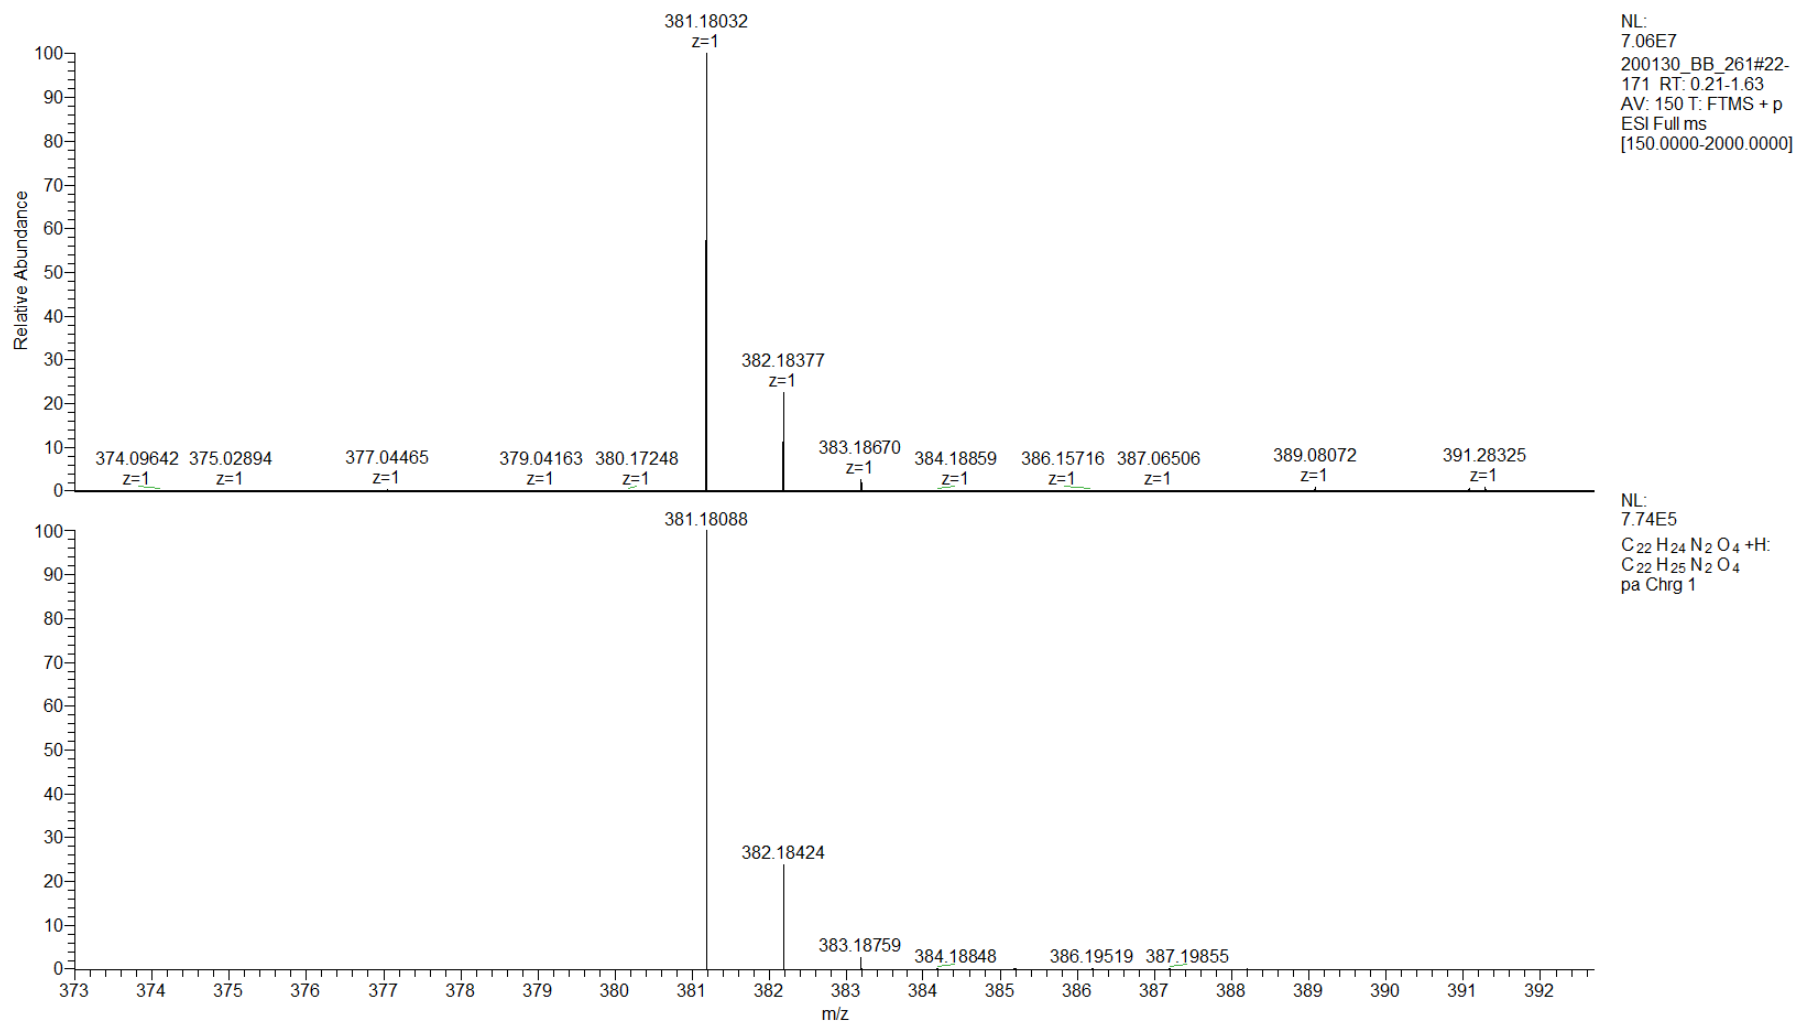

**Figure S89.** ESI HRMS spectrum of methyl 6-(12-methyl-6,11-dioxo-11,12-dihydrodibenzo[*b,f*][1,4]diazocin-5(6*H*)-yl)hexanoate (**10m**).

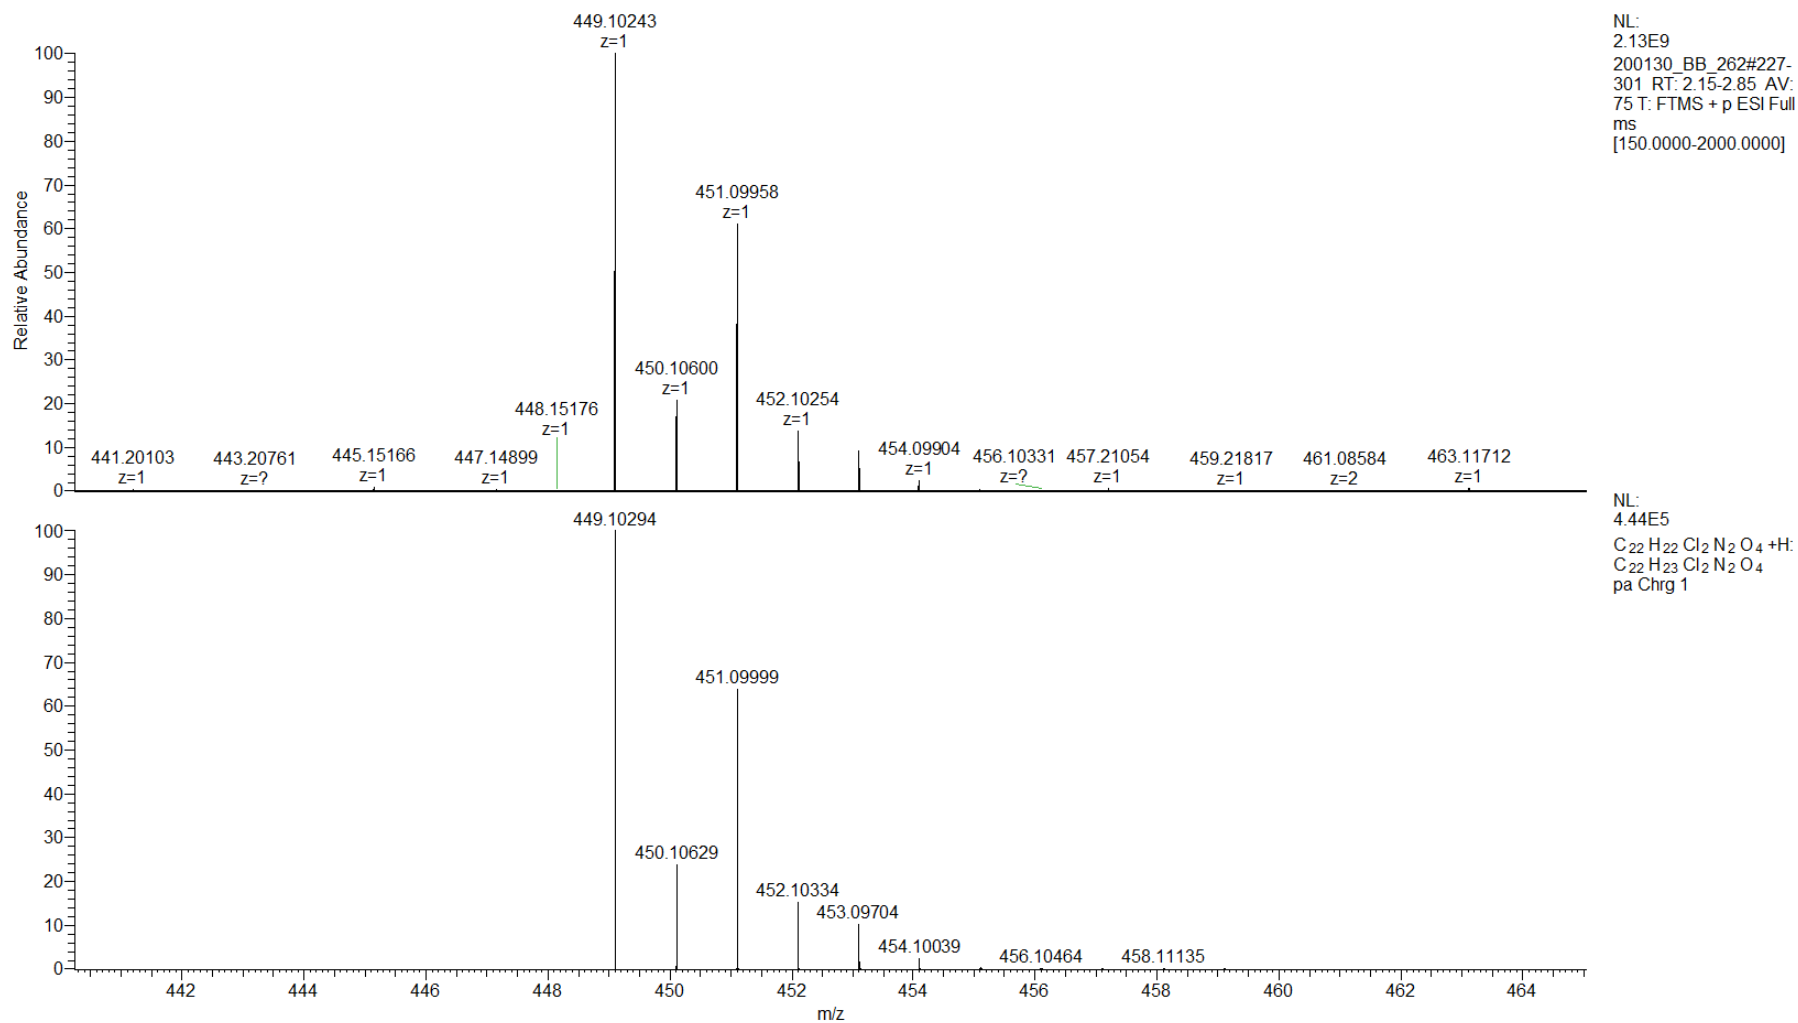

**Figure S90.** ESI HRMS spectrum of methyl 6-(8,9-dichloro-12-methyl-6,11-dioxo-11,12-dihydrodibenzo[*b,f*][1,4]diazocin-5(6*H*)-yl) hexanoate (**10n**).

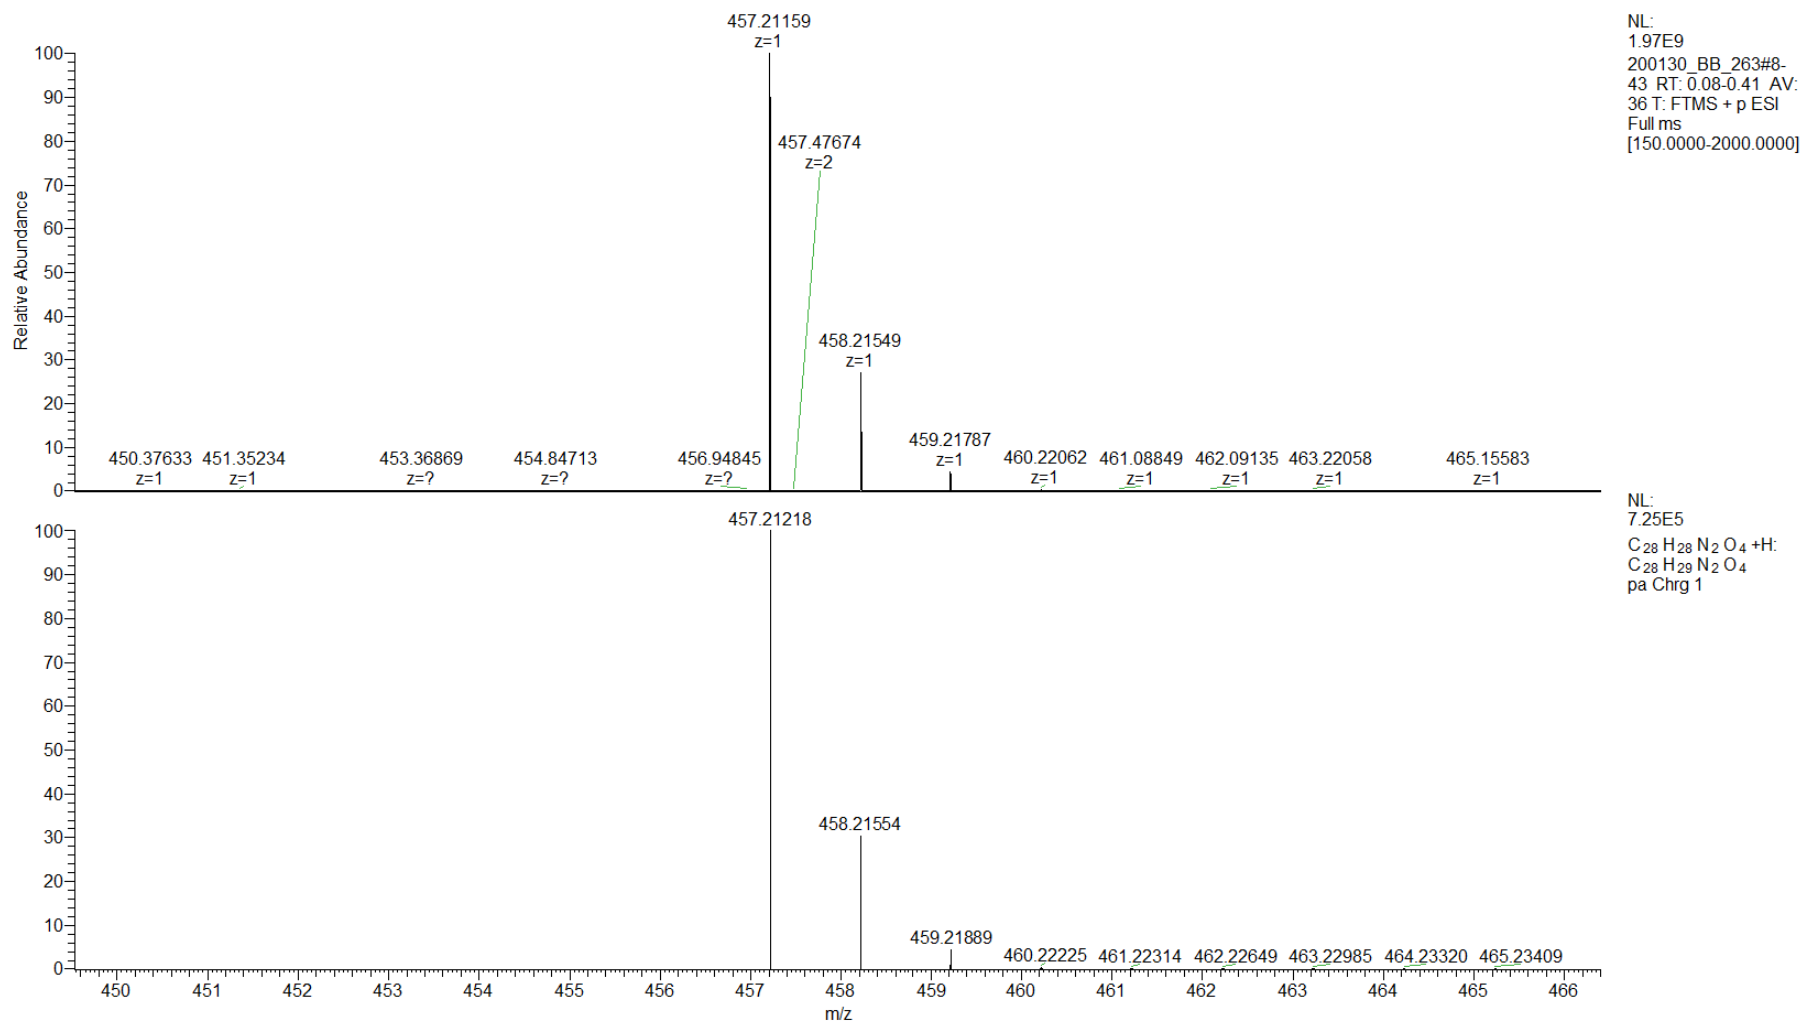

**Figure S91.** ESI HRMS spectrum of methyl 6-(12-benzyl-6,11-dioxo-11,12-dihydrodibenzo[*b,f*][1,4]diazocin-5(6*H*)-yl)hexanoate (**10o**).

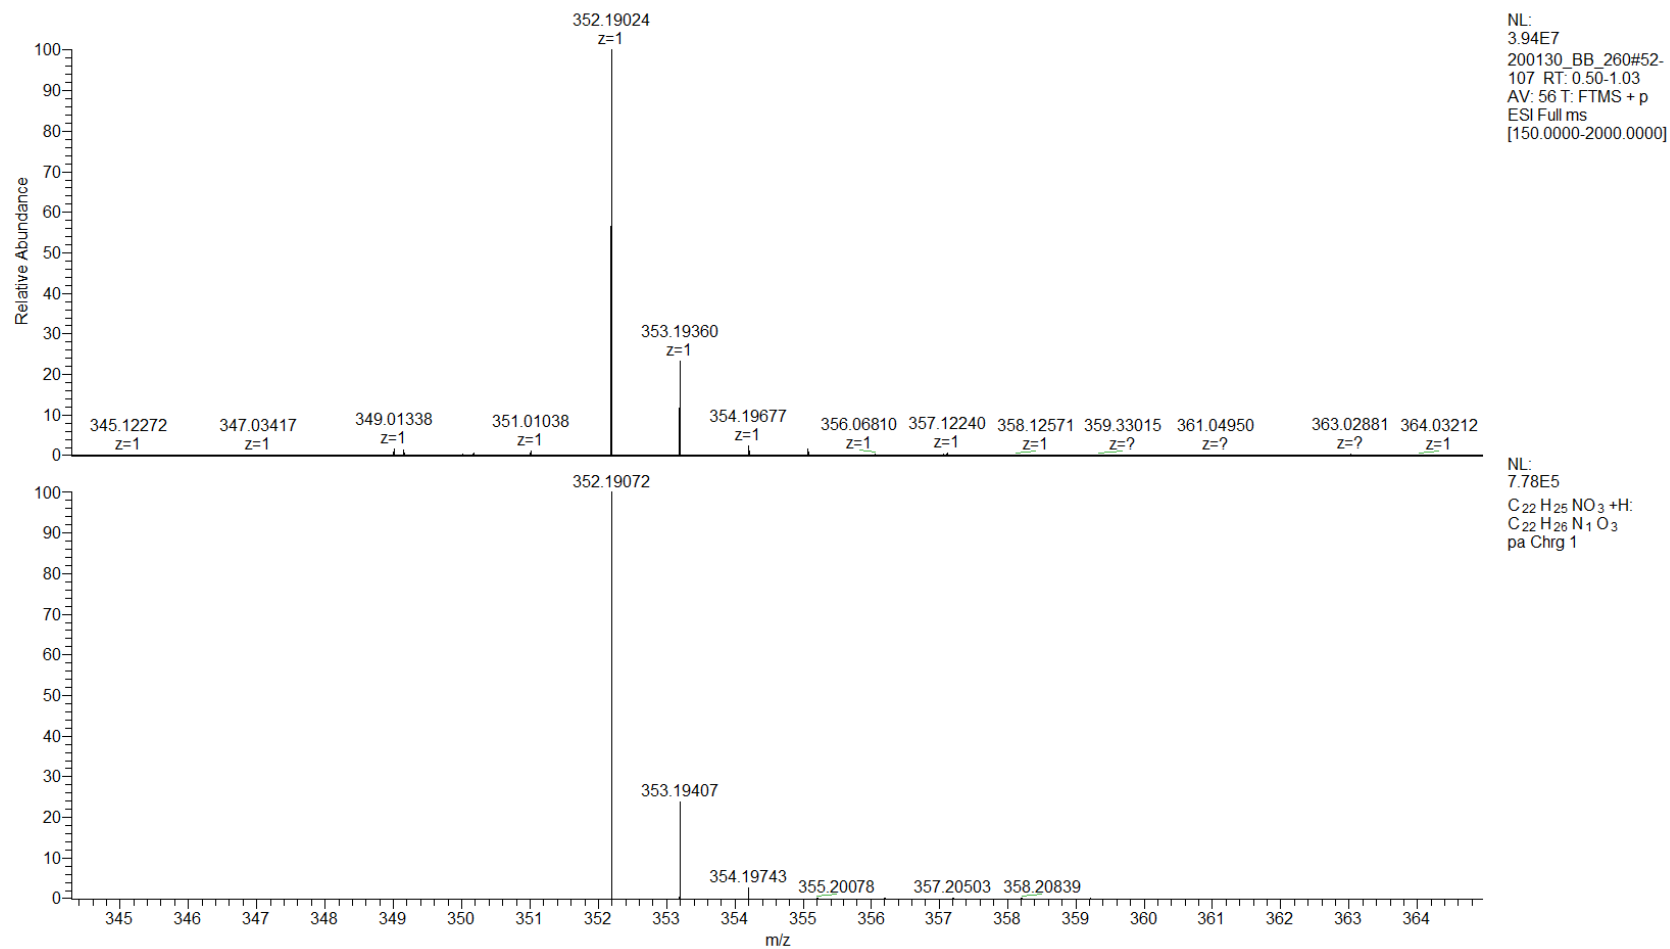

**Figure S92.** ESI HRMS spectrum of methyl 6-(6-oxo-11,12-dihydrodibenzo[*b,f*]azocin-5(6*H*)-yl)hexanoate (**10p**).

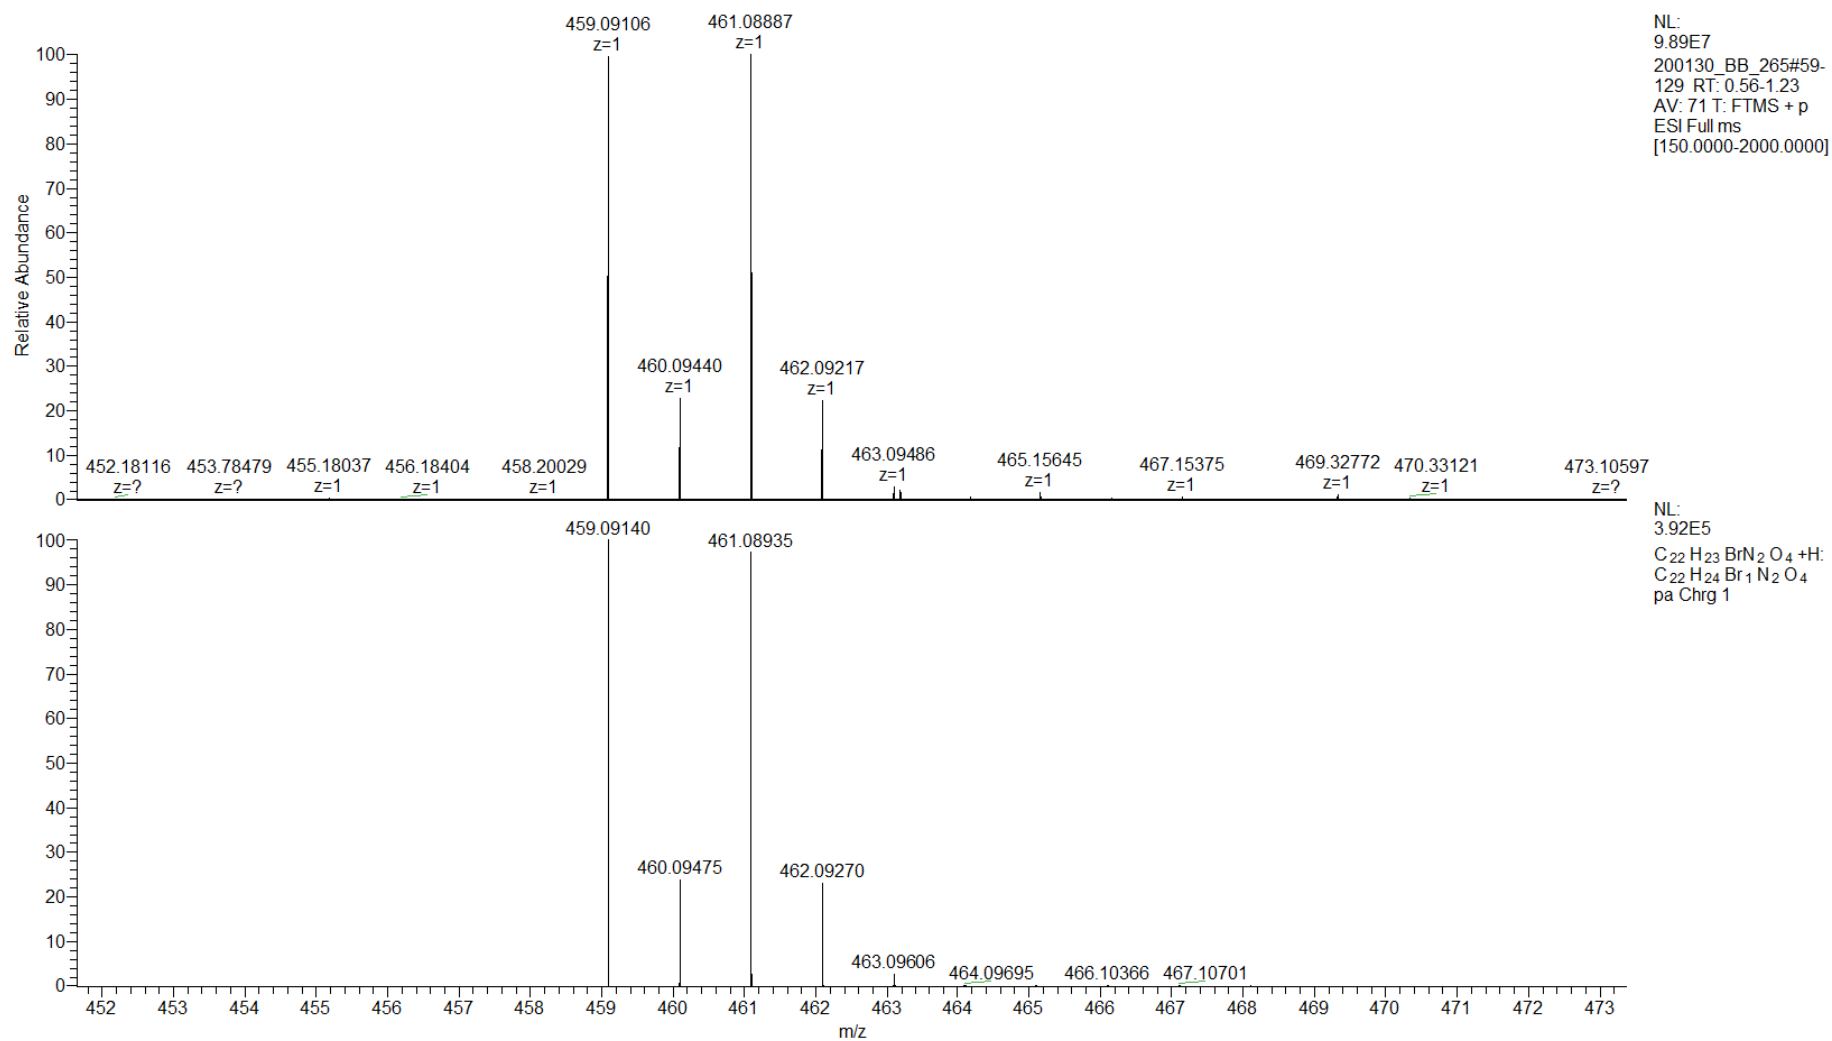

**Figure S93.** ESI HRMS spectrum of methyl 6-(2-bromo-11-methyl-6,12-dioxo-11,12-dihydrodibenzo[*b,f*][1,5]diazocin-5(6*H*)-yl)hexanoate (**10r**).

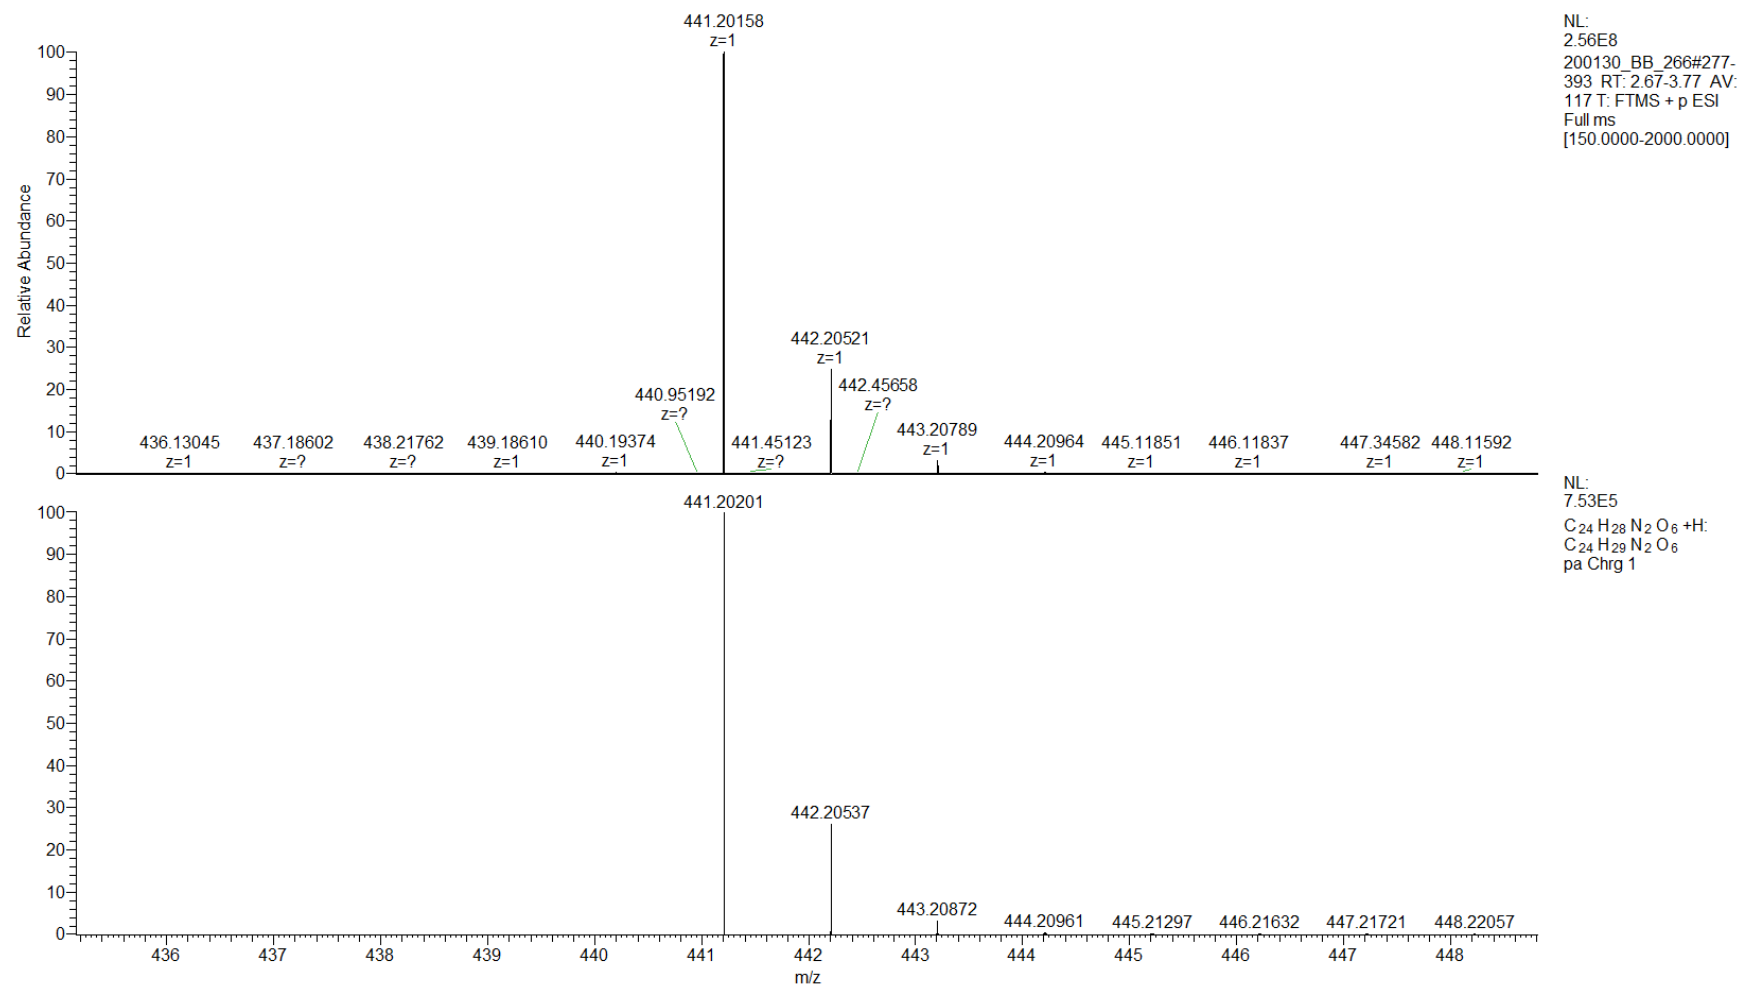

**Figure S94.** ESI HRMS spectrum of methyl 6-(2,3-dimethoxy-11-methyl-6,12-dioxo-11,12-dihydrodibenzo[*b,f*][1,5]diazocin-5(6*H*)-yl)hexanoate (**10s**).

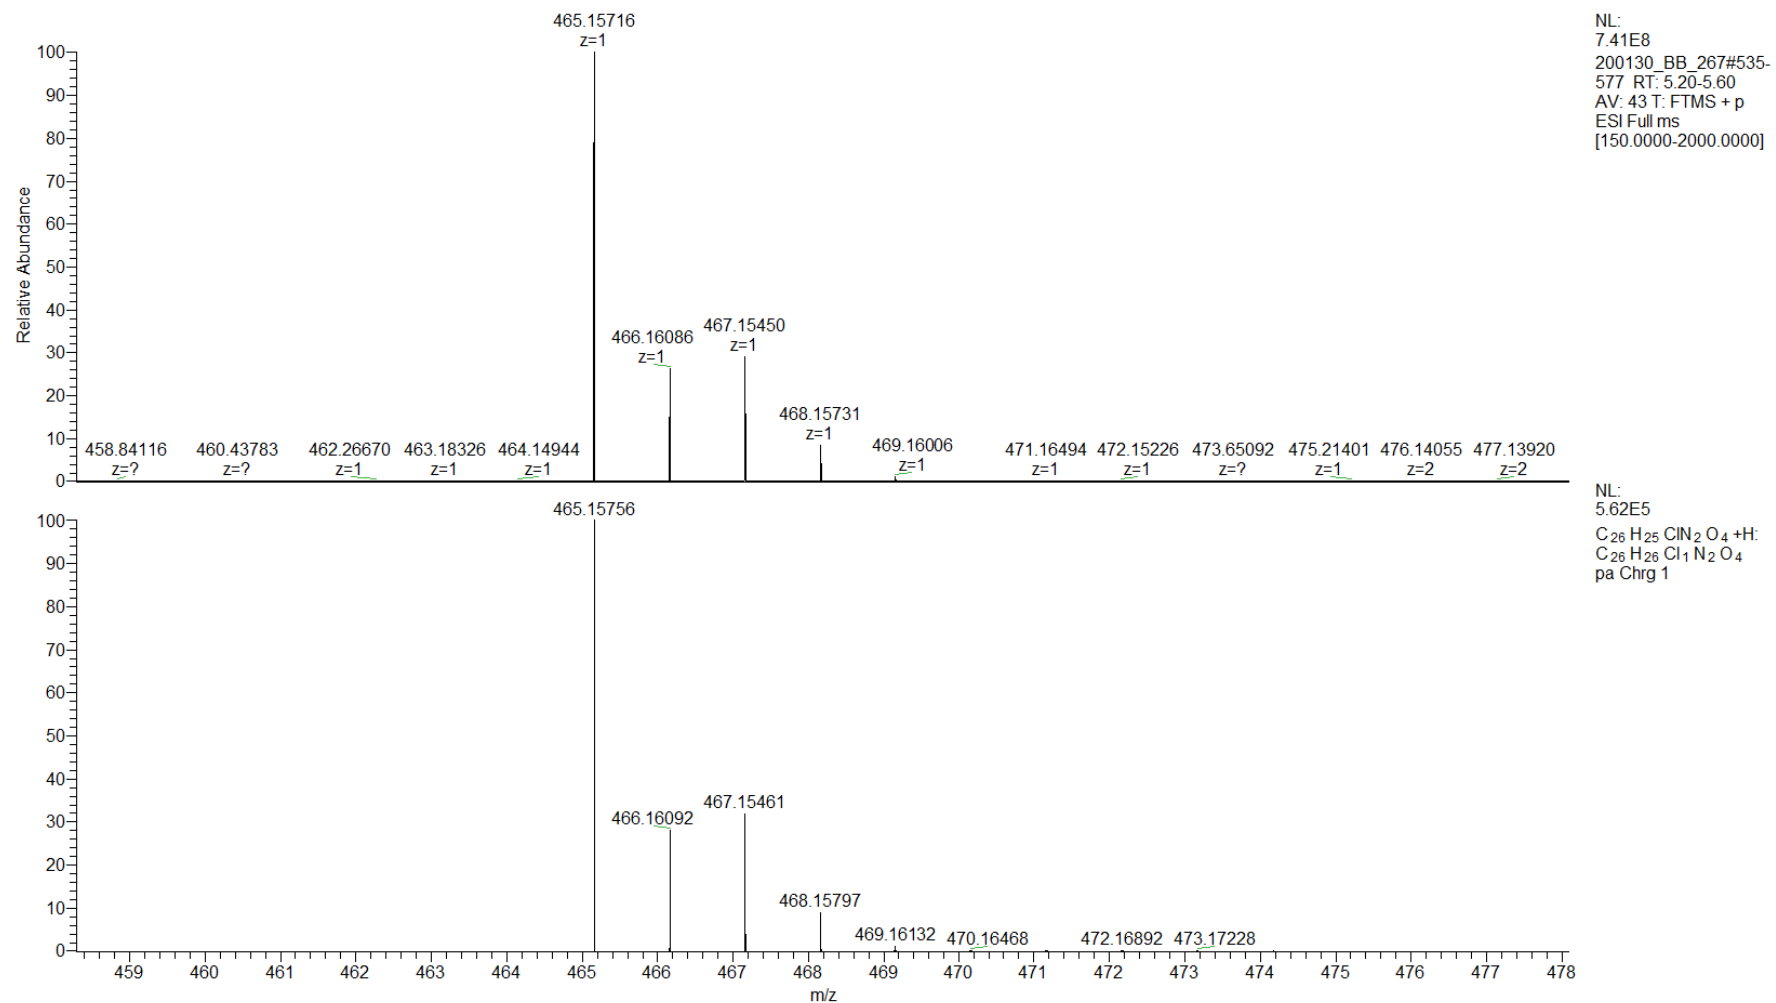

**Figure S95.** ESI HRMS spectrum of methyl 6-(5-methyl-6,14-dioxo-5,14-dihydrobenzonaphtho[2,3-*f*][1,5]diazocin-13(6*H*)-yl)hexanoate (**10t**).

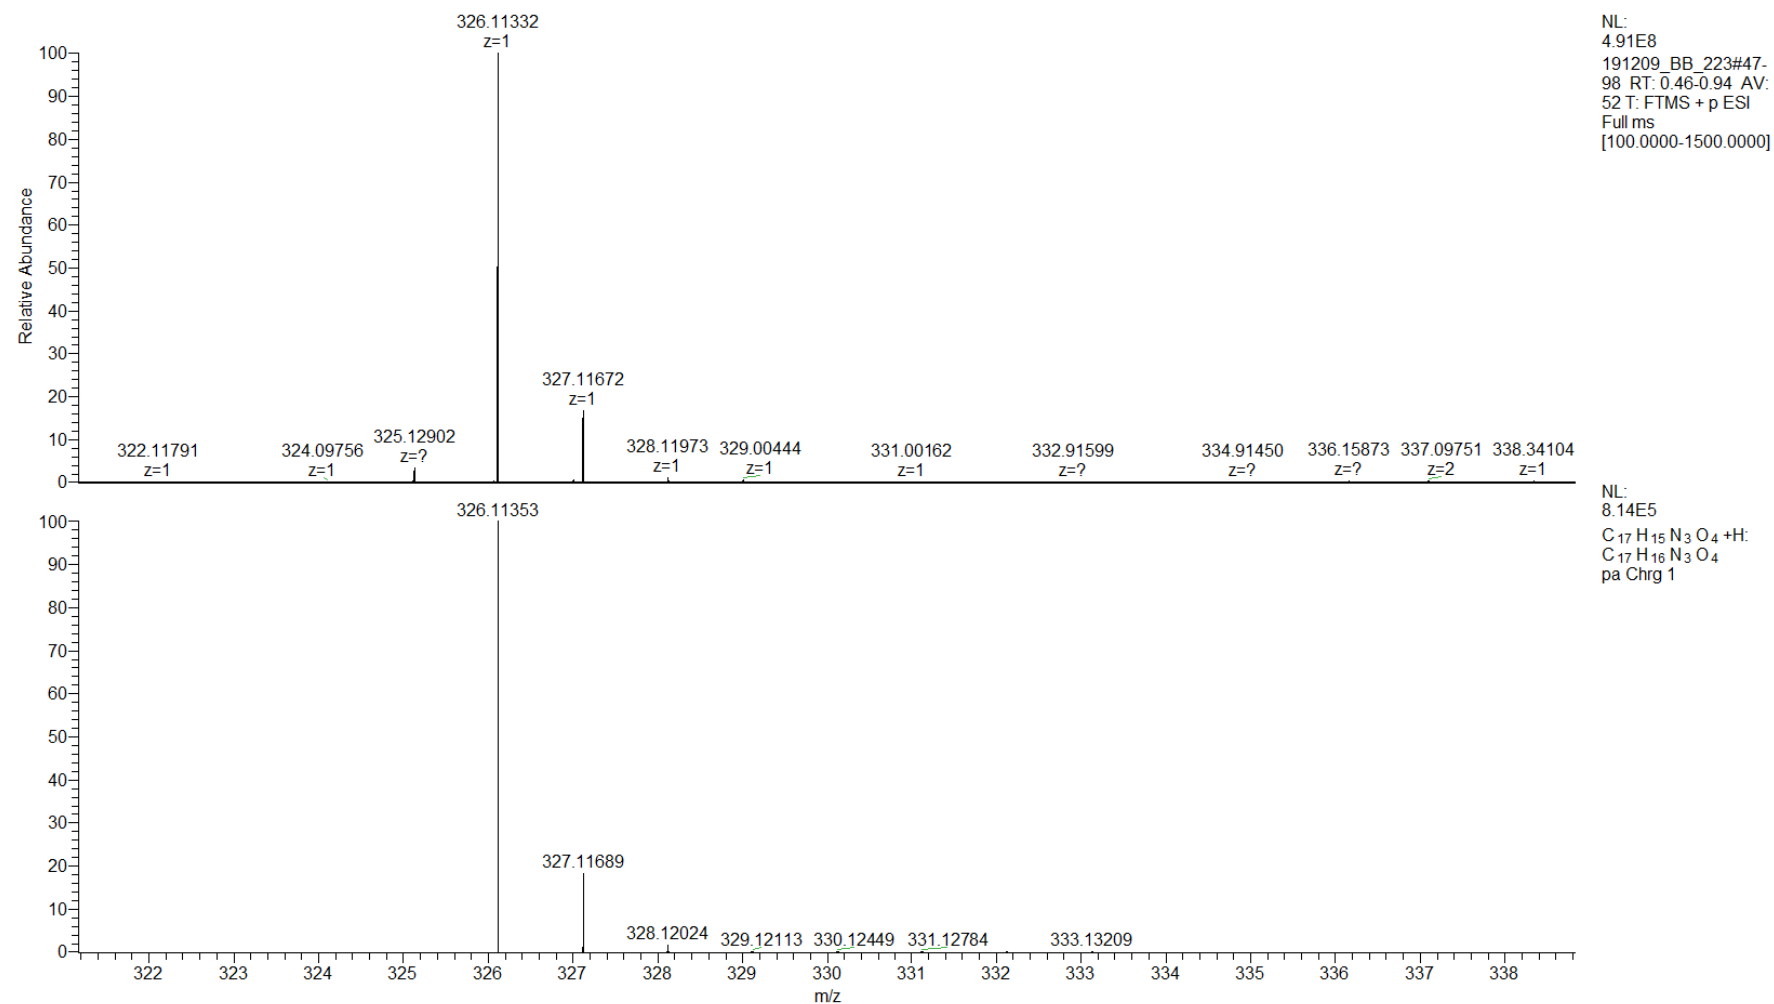

**Figure S96.** ESI HRMS spectrum of *N*-hydroxy-2-(11-methyl-6,12-dioxo-11,12-dihydrodibenzo[*b,f*][1,5]diazocin-5(6*H*)-yl)acetamide (**7a**).

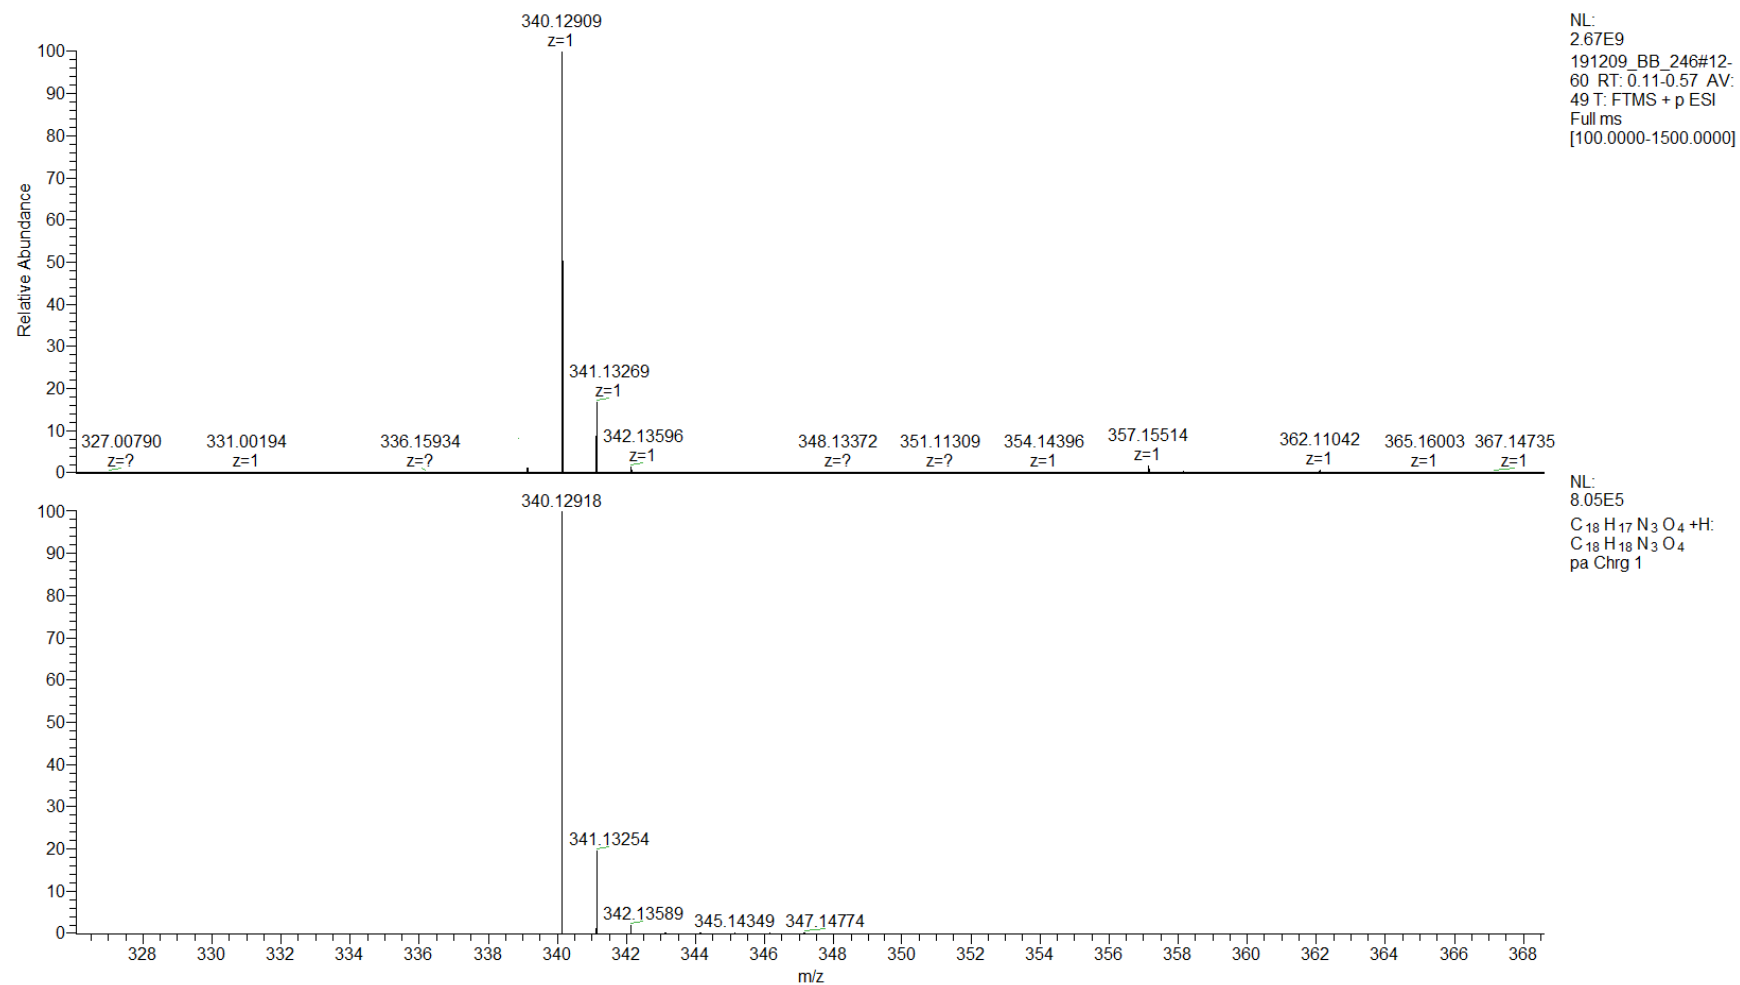

**Figure S97.** ESI HRMS spectrum of *N*-hydroxy-3-(11-methyl-6,12-dioxo-11,12-dihydrodibenzo[*b,f*][1,5]diazocin-5(6*H*)-yl)propanamide (**7b**).

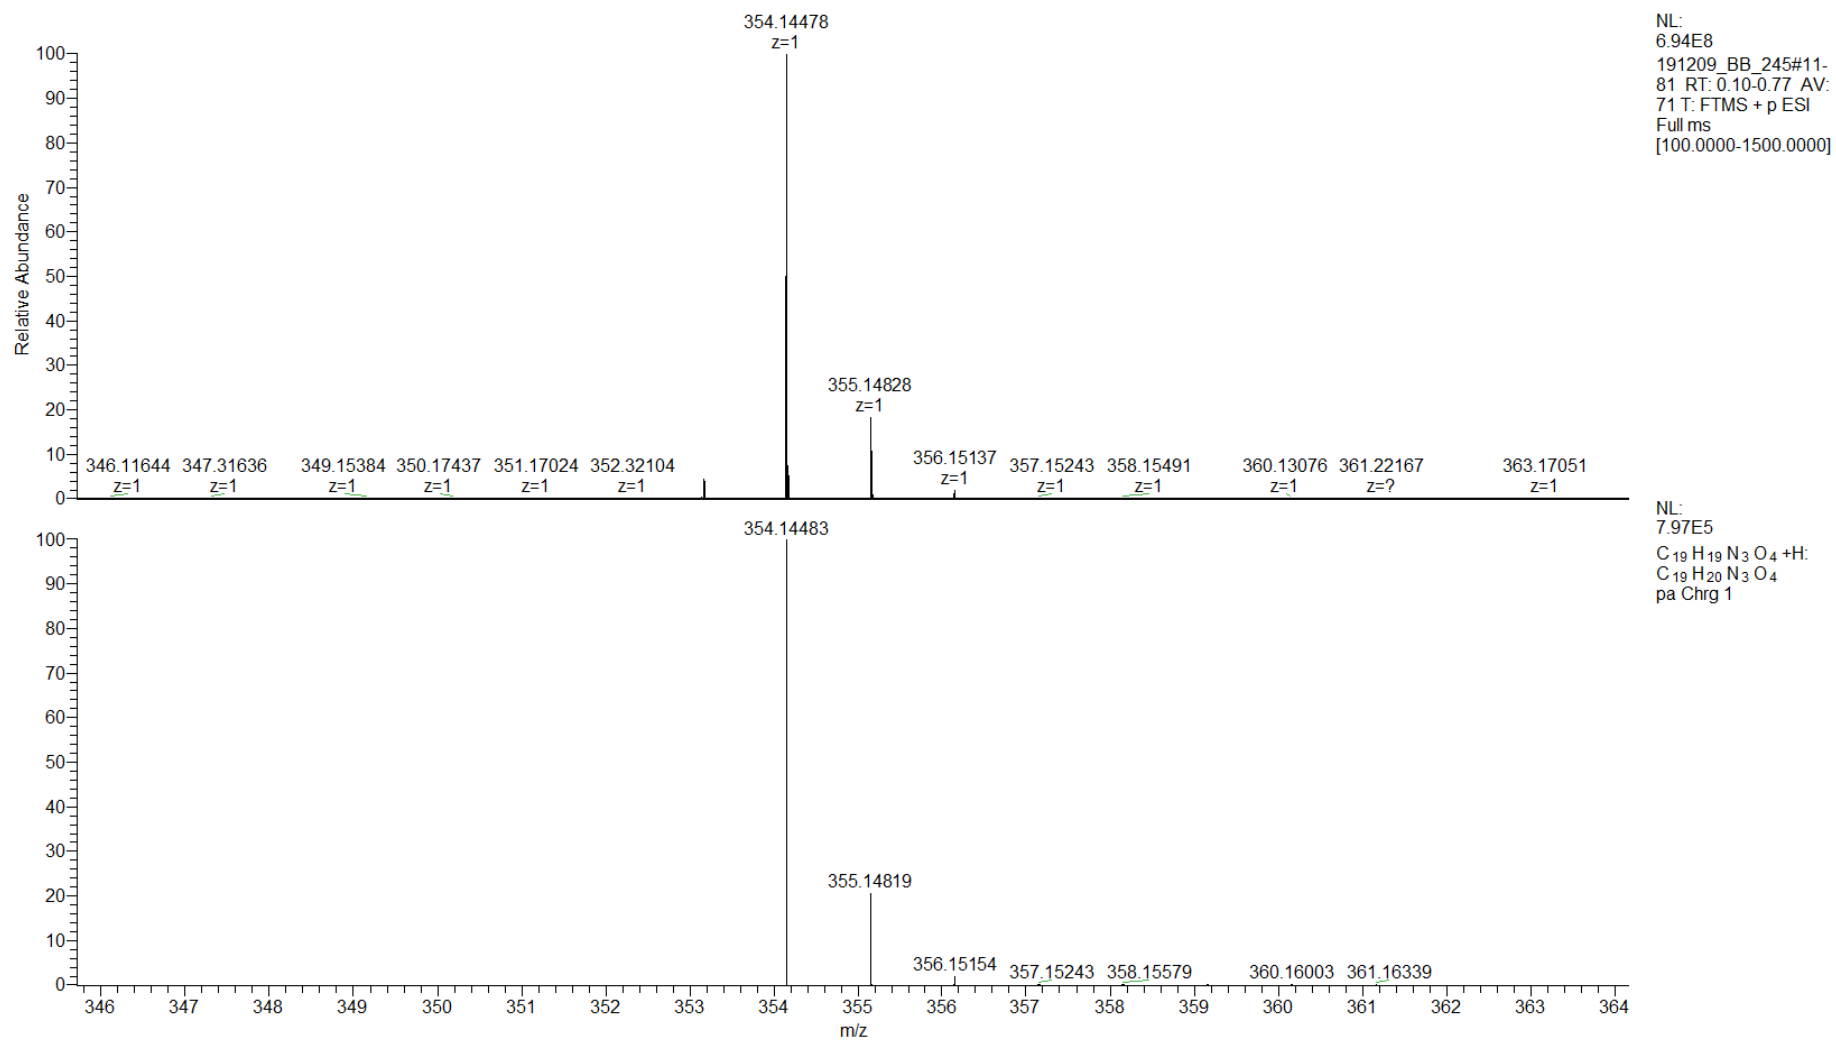

**Figure S98.** ESI HRMS spectrum of *N*-hydroxy-4-(11-methyl-6,12-dioxo-11,12-dihydrodibenzo[*b,f*][1,5]diazocin-5(6*H*)-yl)butanamide (**7c**).

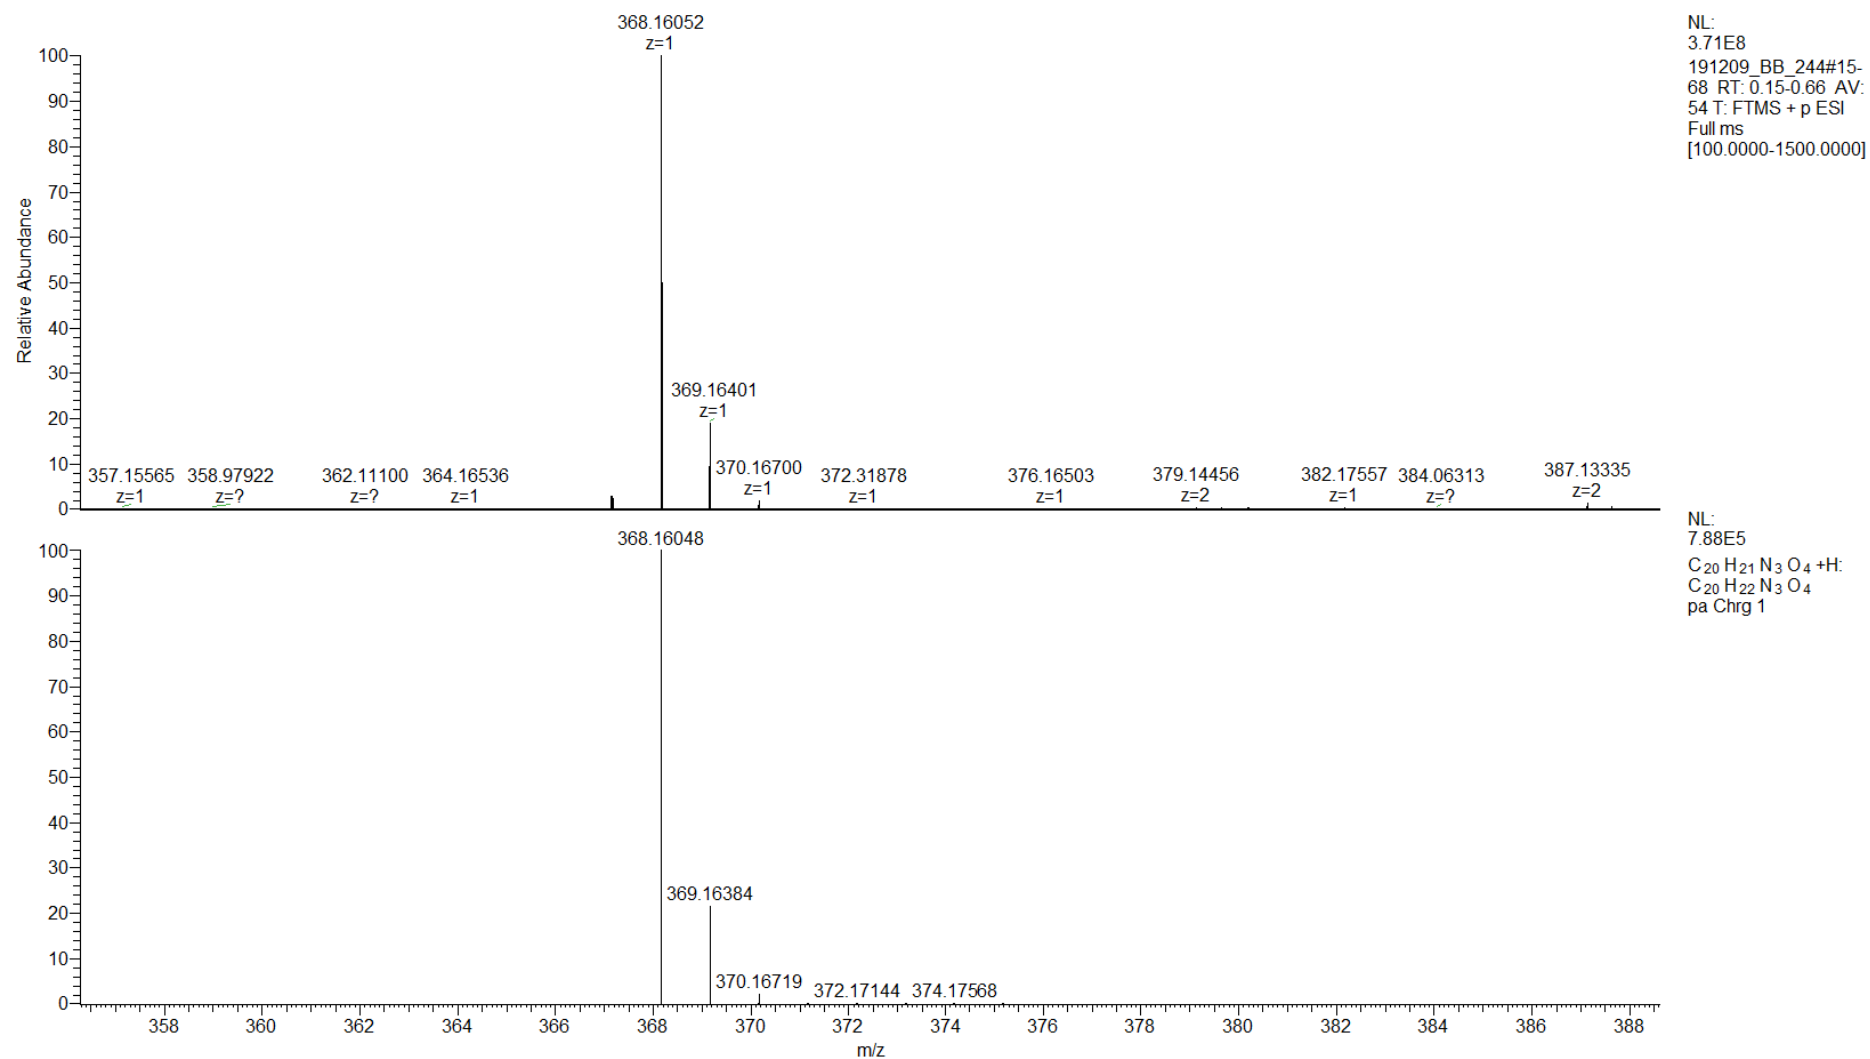

**Figure S99.** ESI HRMS spectrum of *N*-hydroxy-5-(11-methyl-6,12-dioxo-11,12-dihydrodibenzo[*b,f*][1,5]diazocin-5(6*H*)-yl)pentanamide (**7d**).

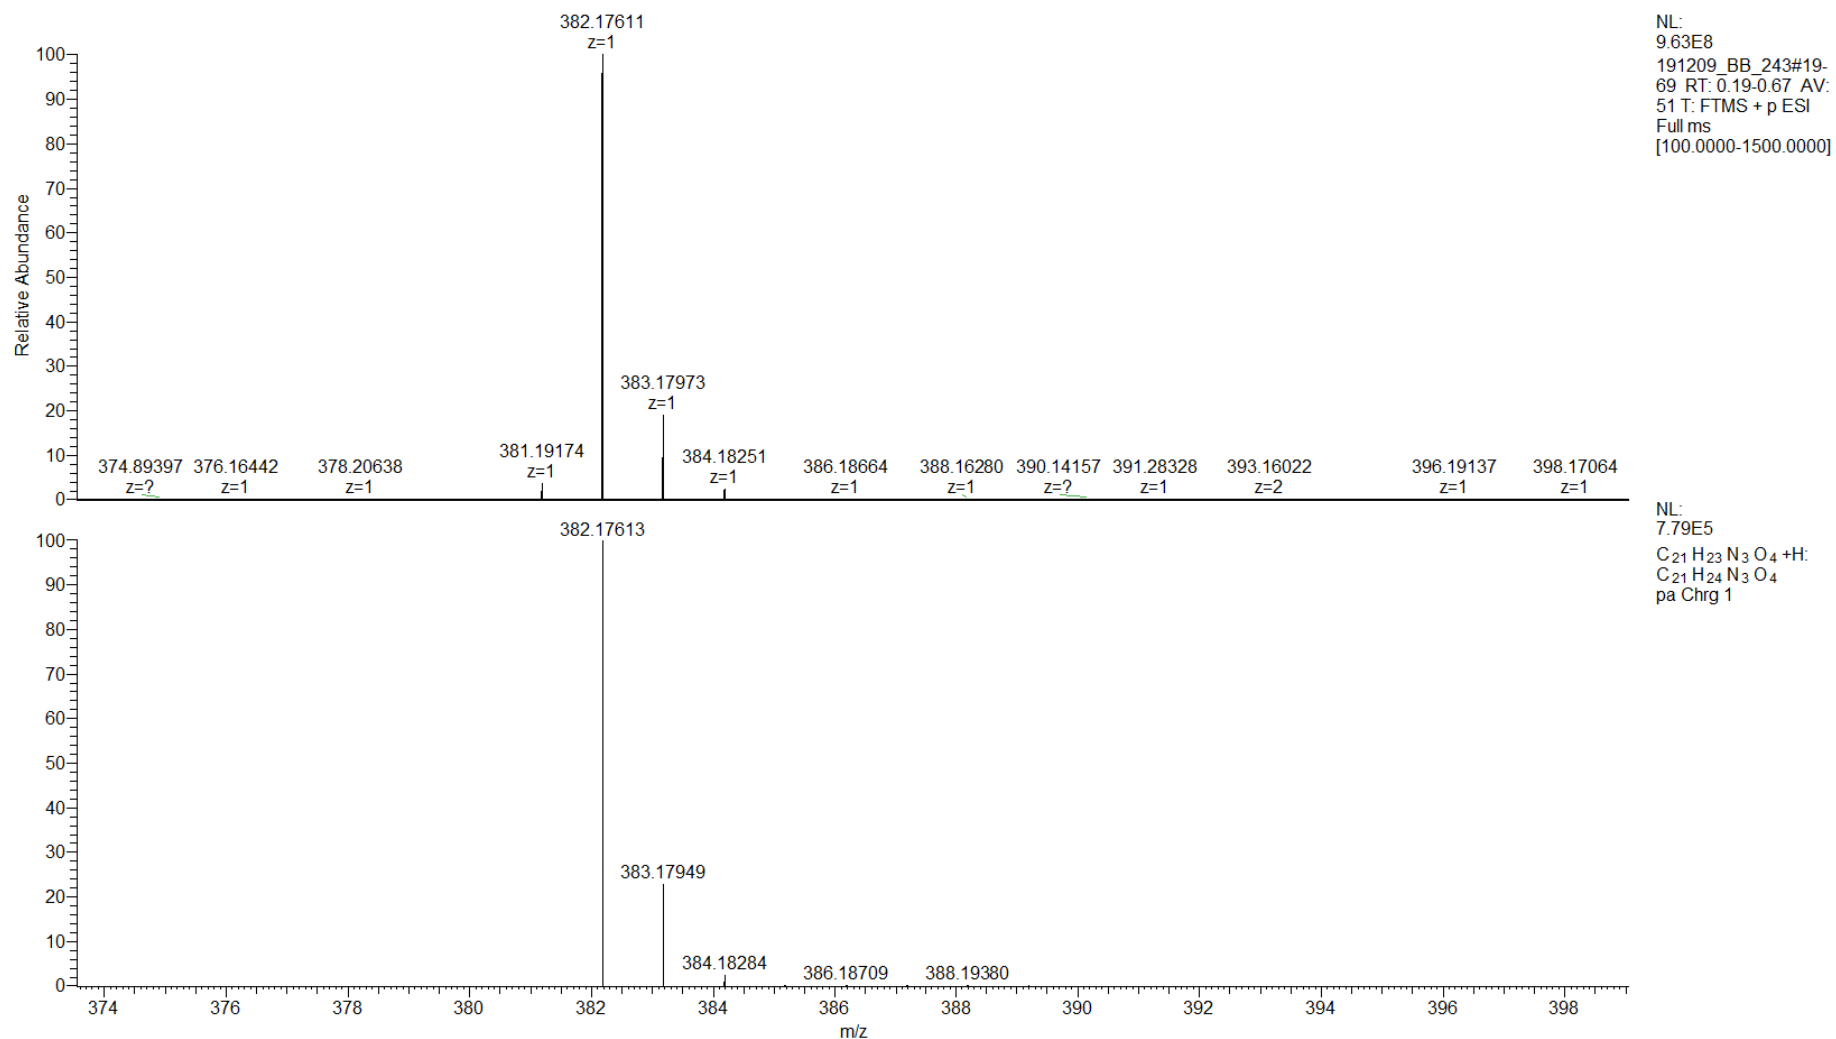

**Figure S100.** ESI HRMS spectrum of *N*-hydroxy-6-(11-methyl-6,12-dioxo-11,12-dihydrodibenzo[*b,f*][1,5]diazocin-5(6*H*)-yl)hexanamide (**7e**).

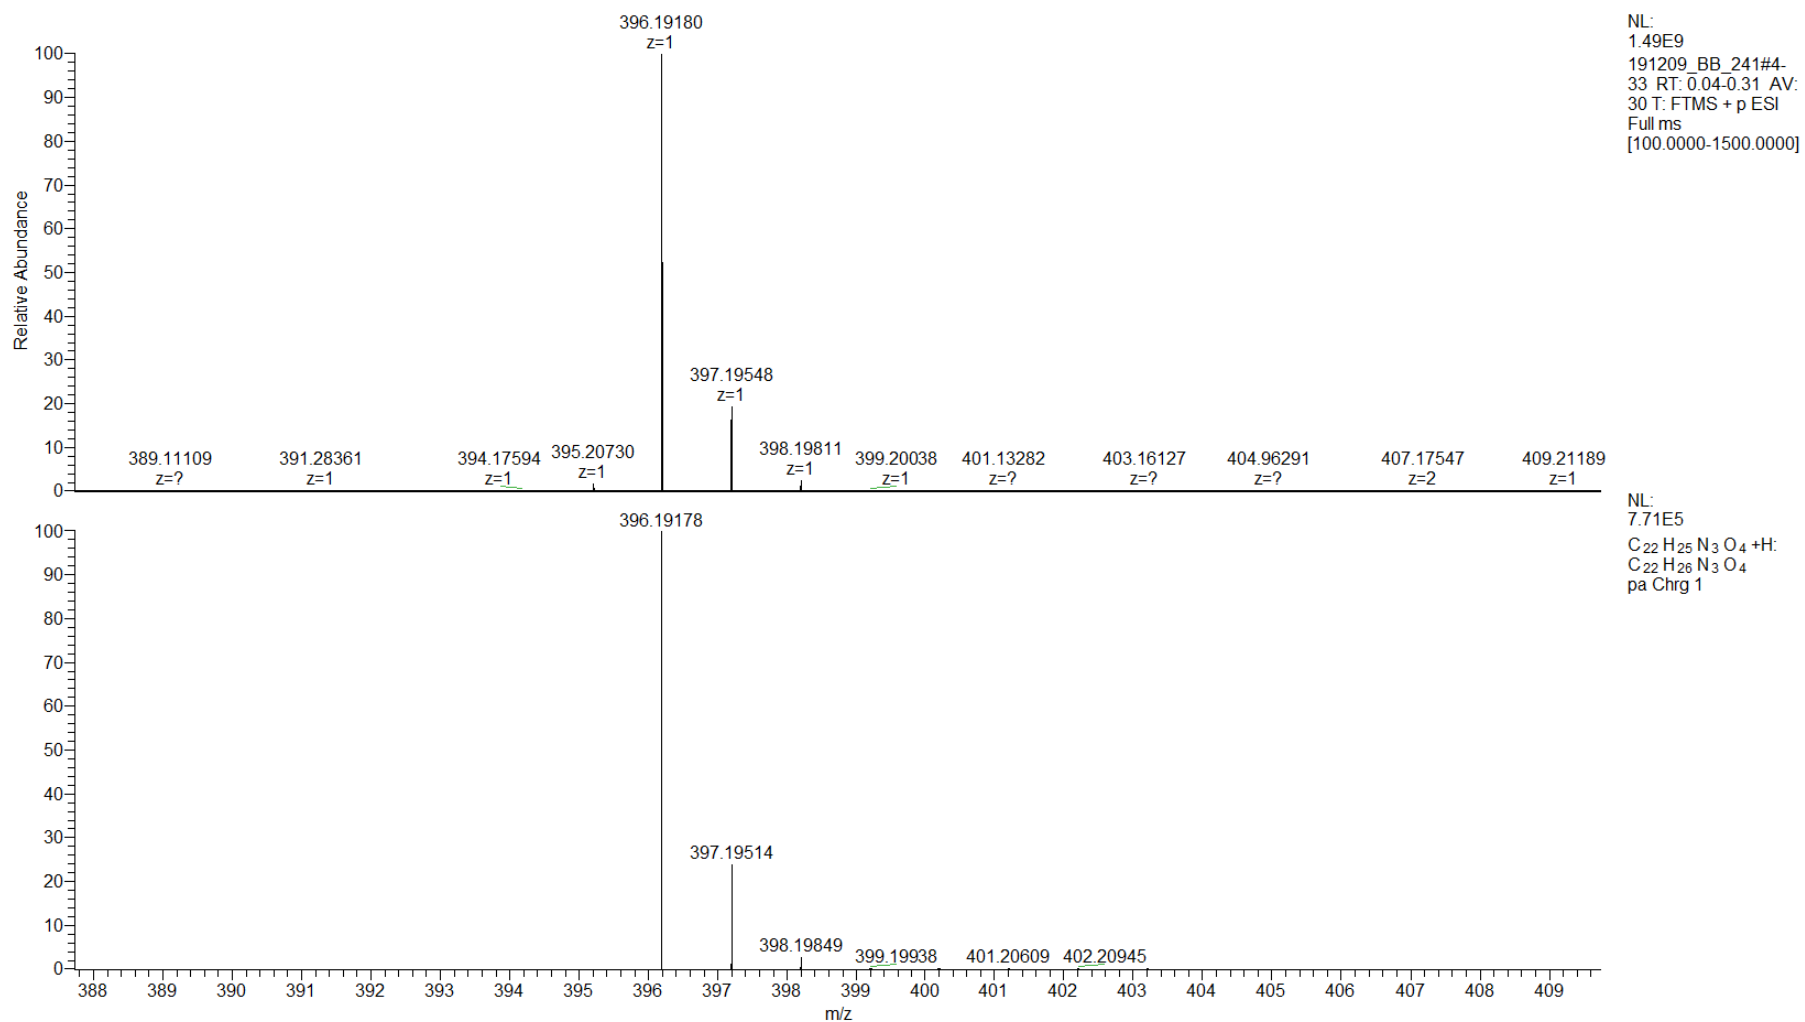

**Figure S101.** ESI HRMS spectrum of *N*-hydroxy-7-(11-methyl-6,12-dioxo-11,12-dihydrodibenzo[*b,f*][1,5]diazocin-5(6*H*)-yl)heptanamide (**7f**).

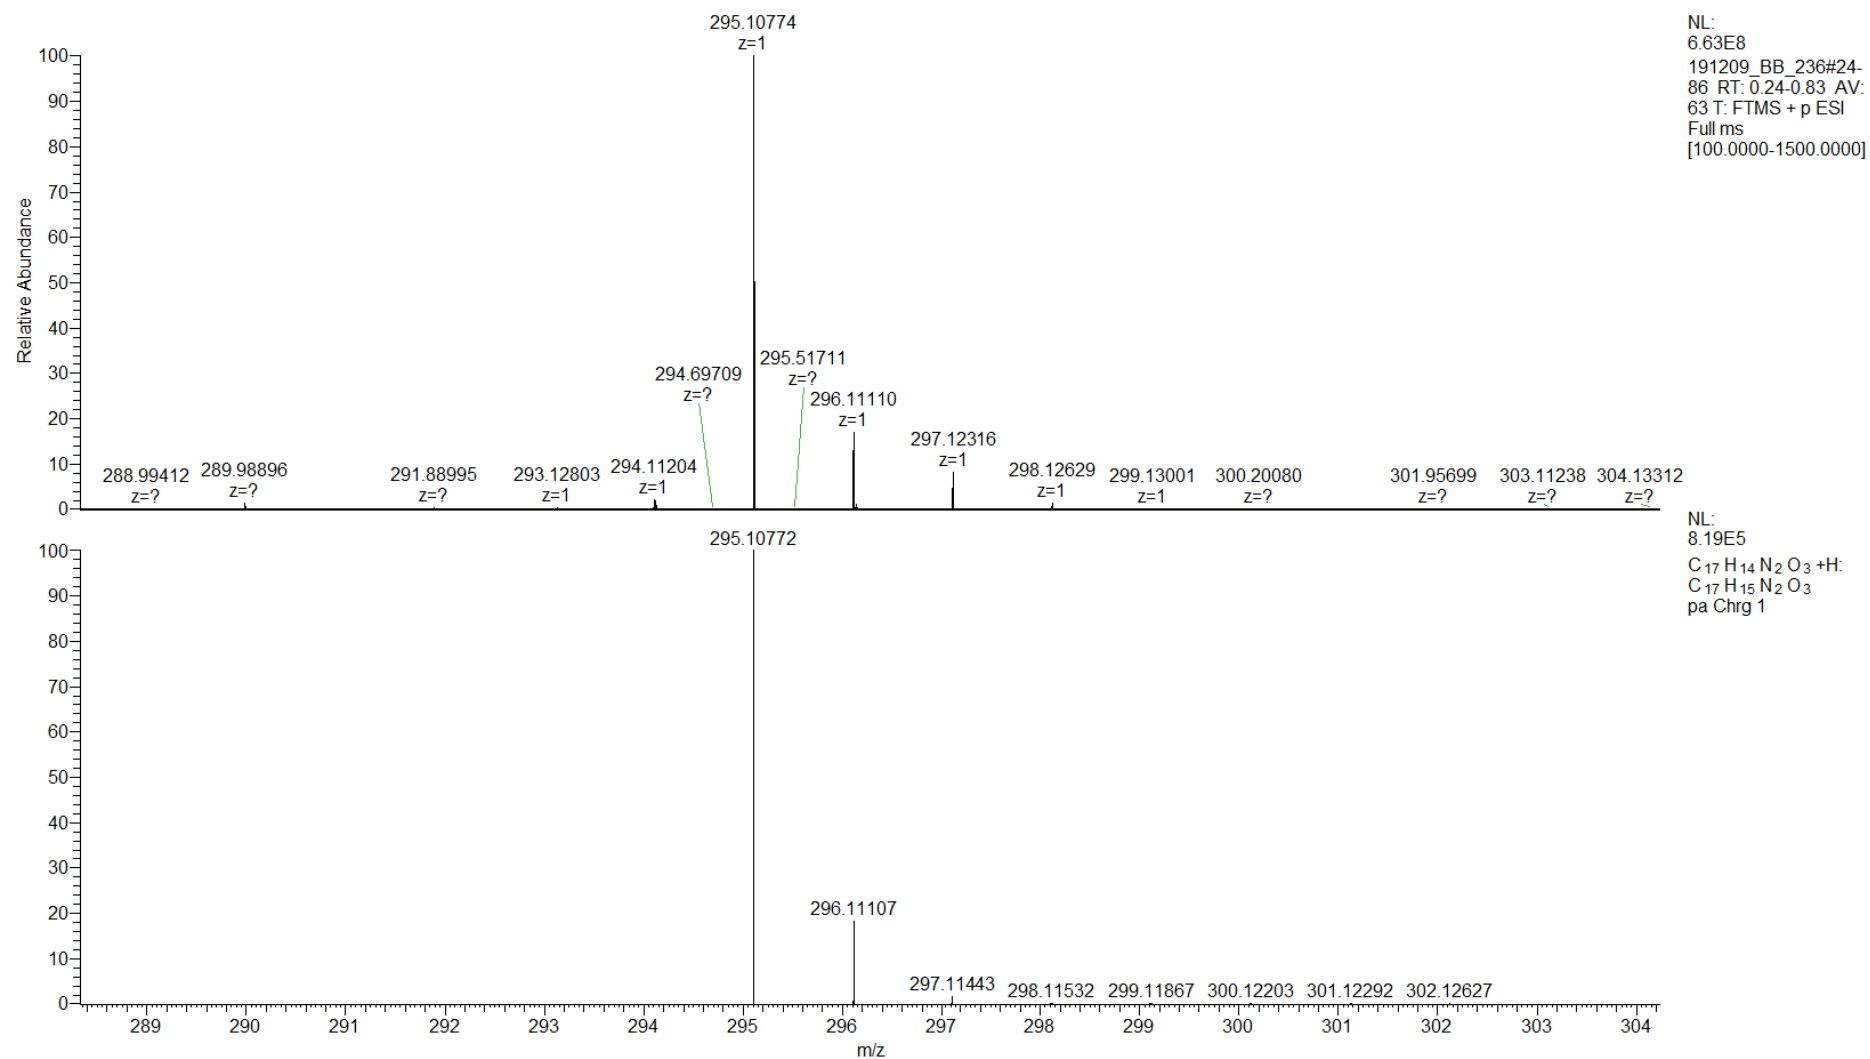

**Figure S102.** ESI HRMS spectrum of *N*-hydroxy-2-(6-oxodibenzo[*b,f*]azocin-5(6H)-yl)acetamide (**7g**).

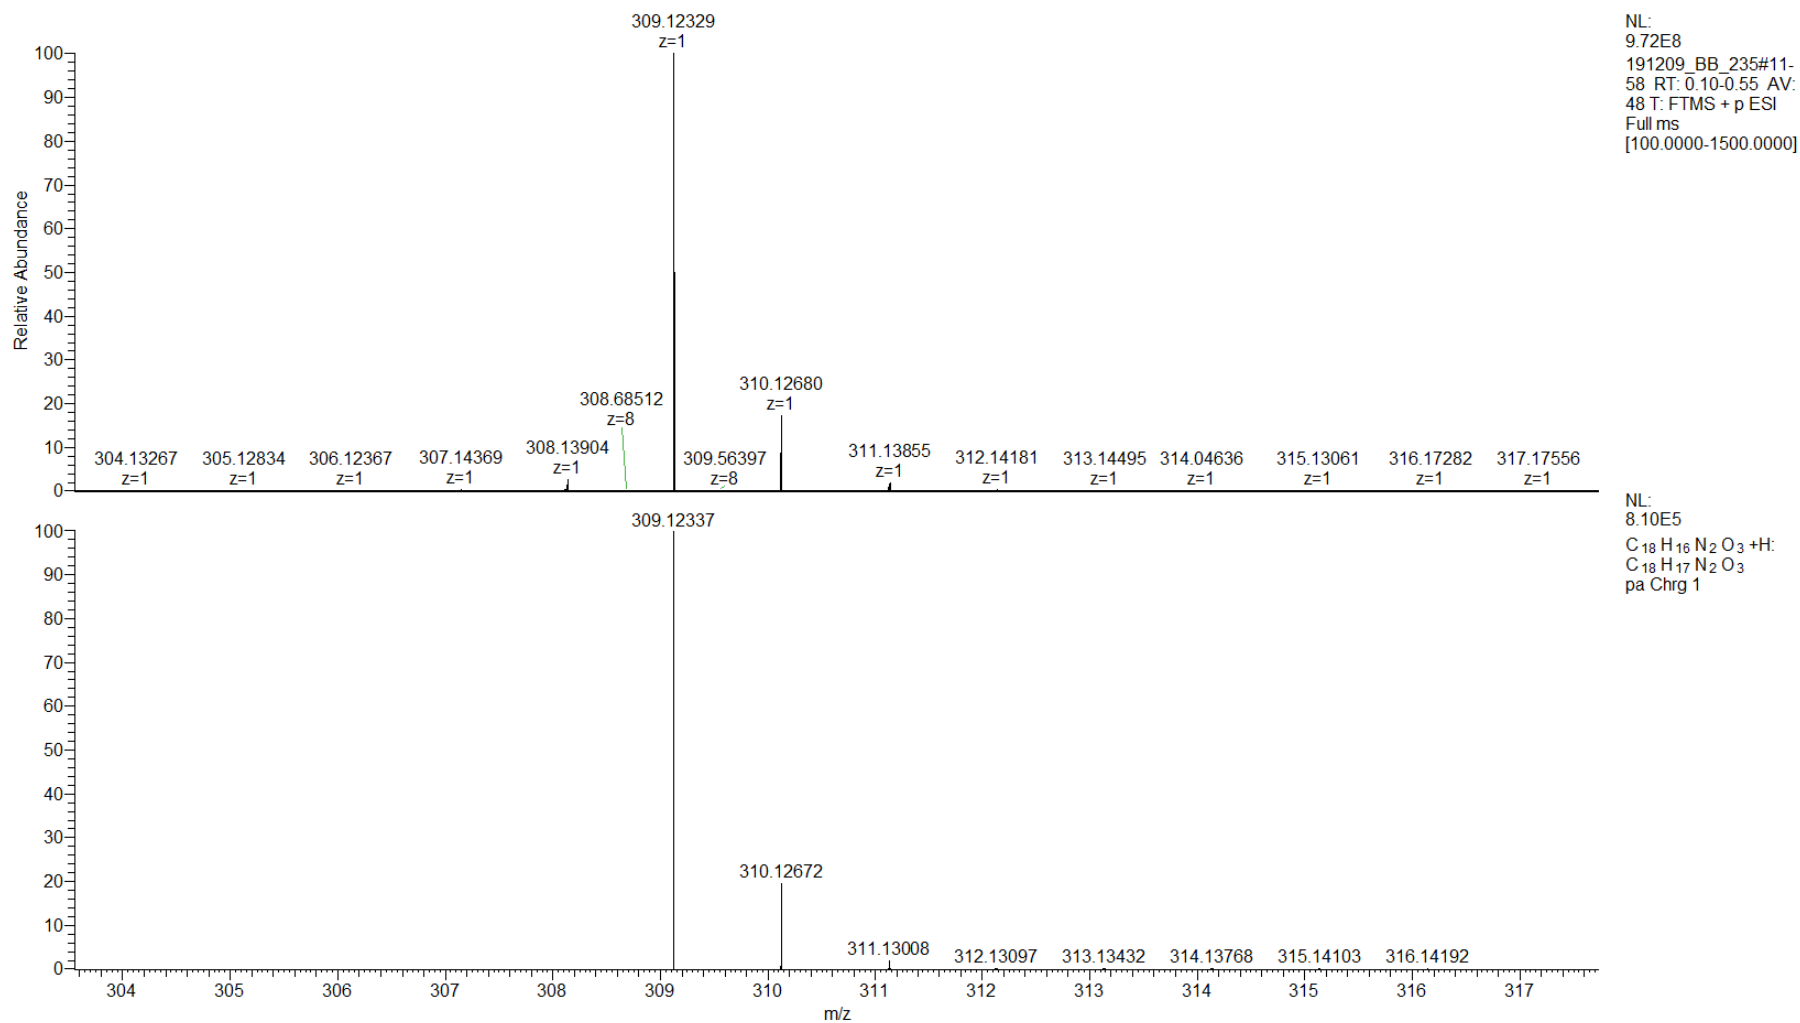

**Figure S103.** ESI HRMS spectrum of *N*-hydroxy-3-(6-oxodibenzo[*b,f*]azocin-5(6*H*)-yl)propanamide (**7h**).

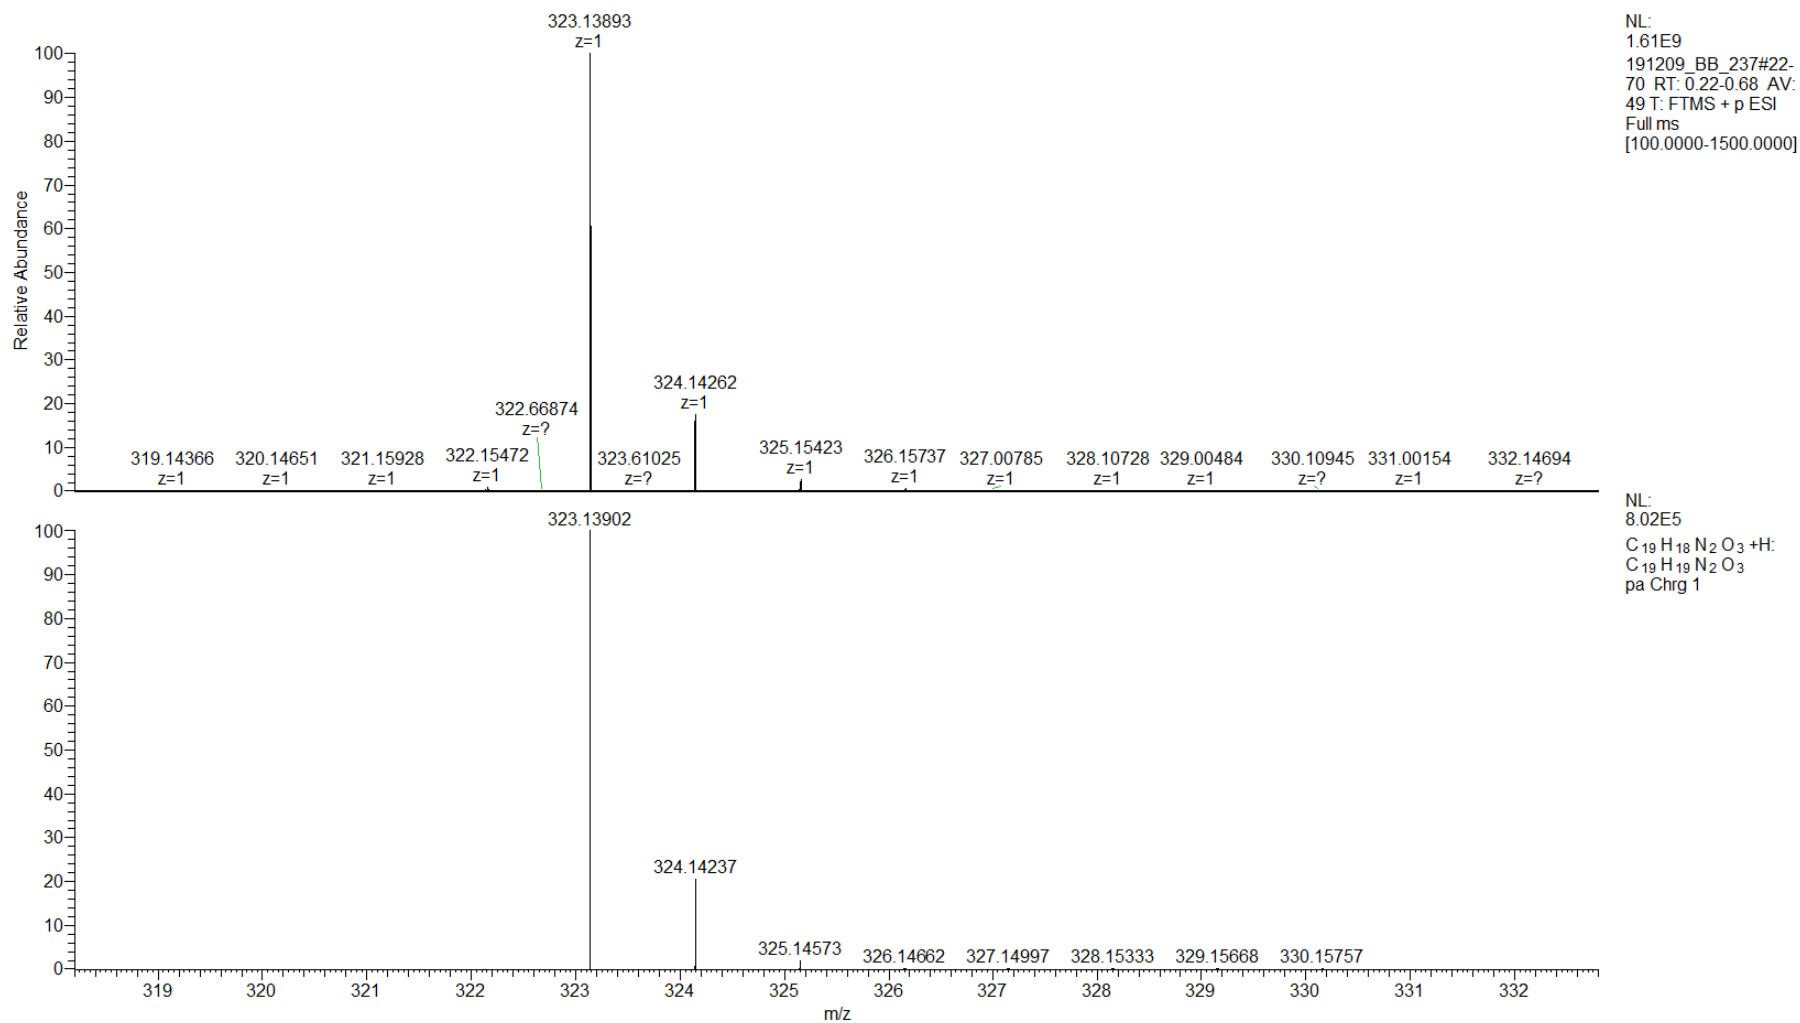

**Figure S104.** ESI HRMS spectrum of *N*-hydroxy-4-(6-oxodibenzo[*b,f*]azocin-5(6*H*)-yl)butanamide (**7i**).

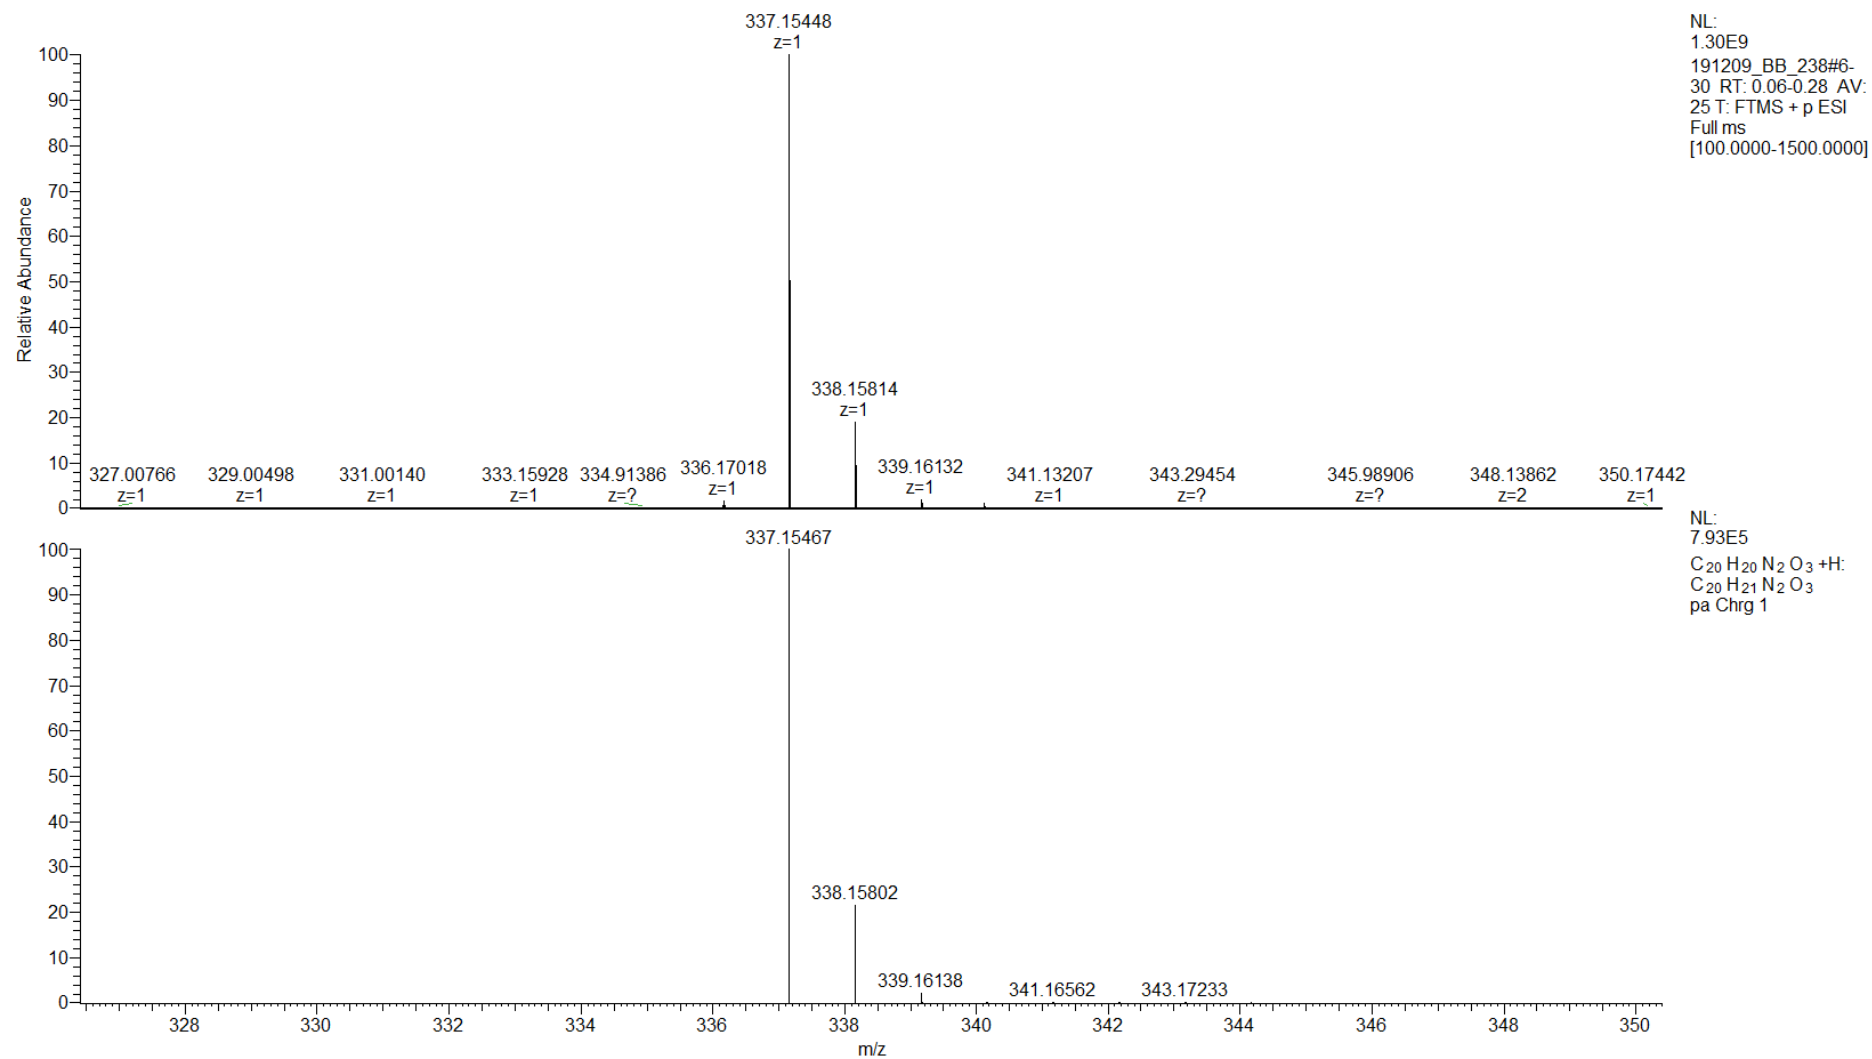

**Figure S105.** ESI HRMS spectrum of *N*-hydroxy-5-(6-oxodibenzo[*b,f*]azocin-5(6*H*)-yl)pentanamide (**7j**).

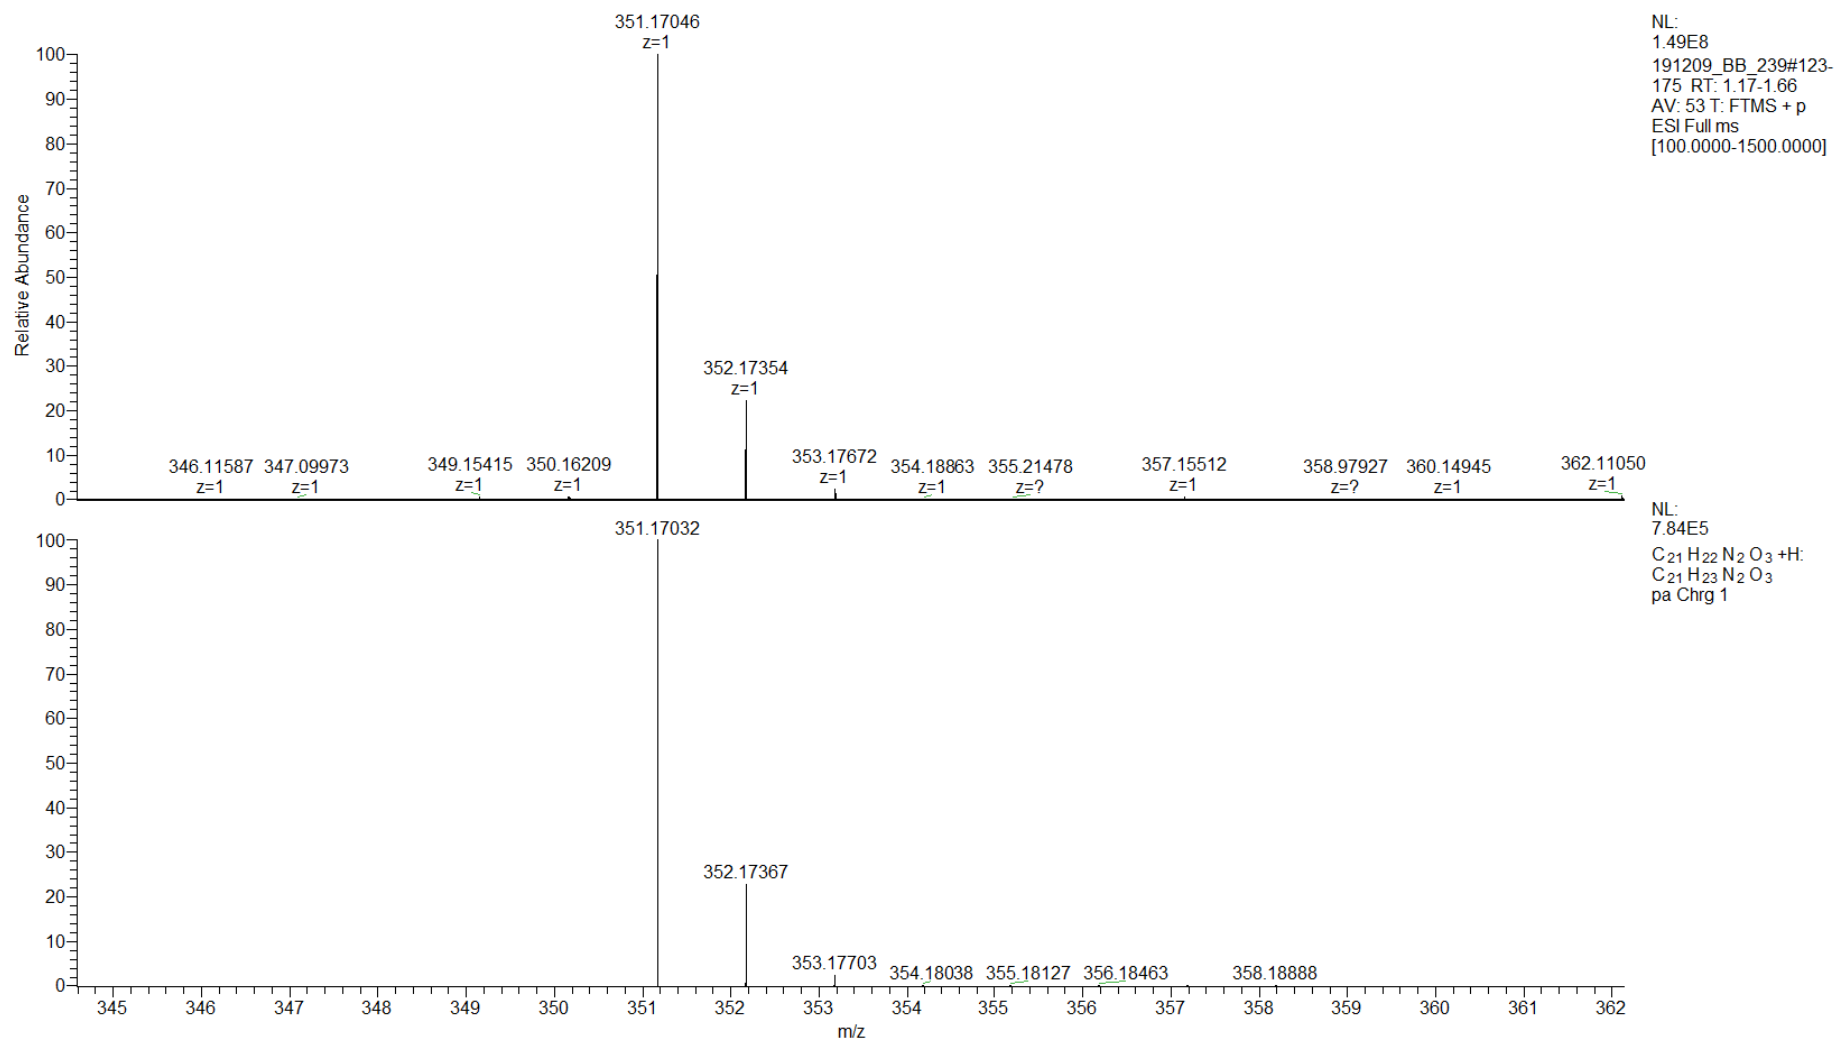

**Figure S106.** ESI HRMS spectrum of *N*-hydroxy-6-(6-oxodibenzo[*b,f*]azocin-5(6*H*)-yl)hexanamide (**7k**).

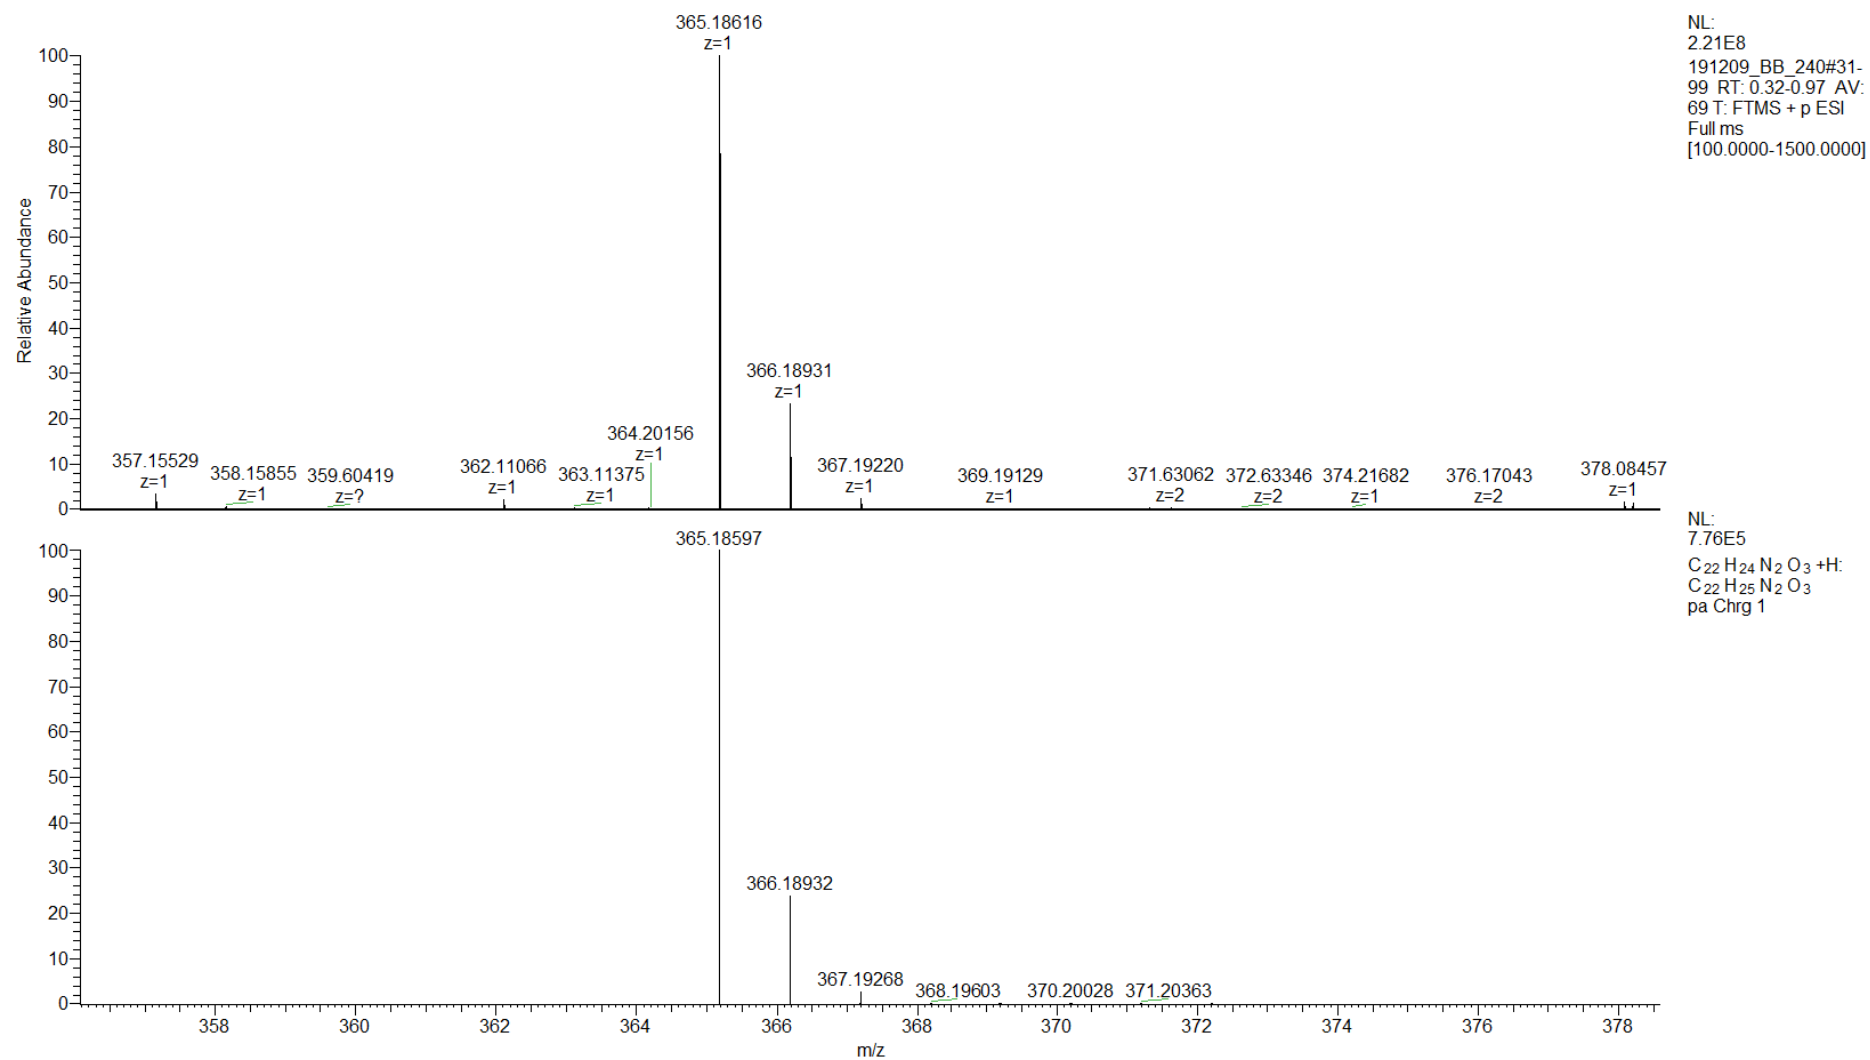

**Figure S107.** ESI HRMS spectrum of *N*-hydroxy-7-(6-oxodibenzo[*b,f*]azocin-5(6*H*)-yl)heptanamide (**71**).

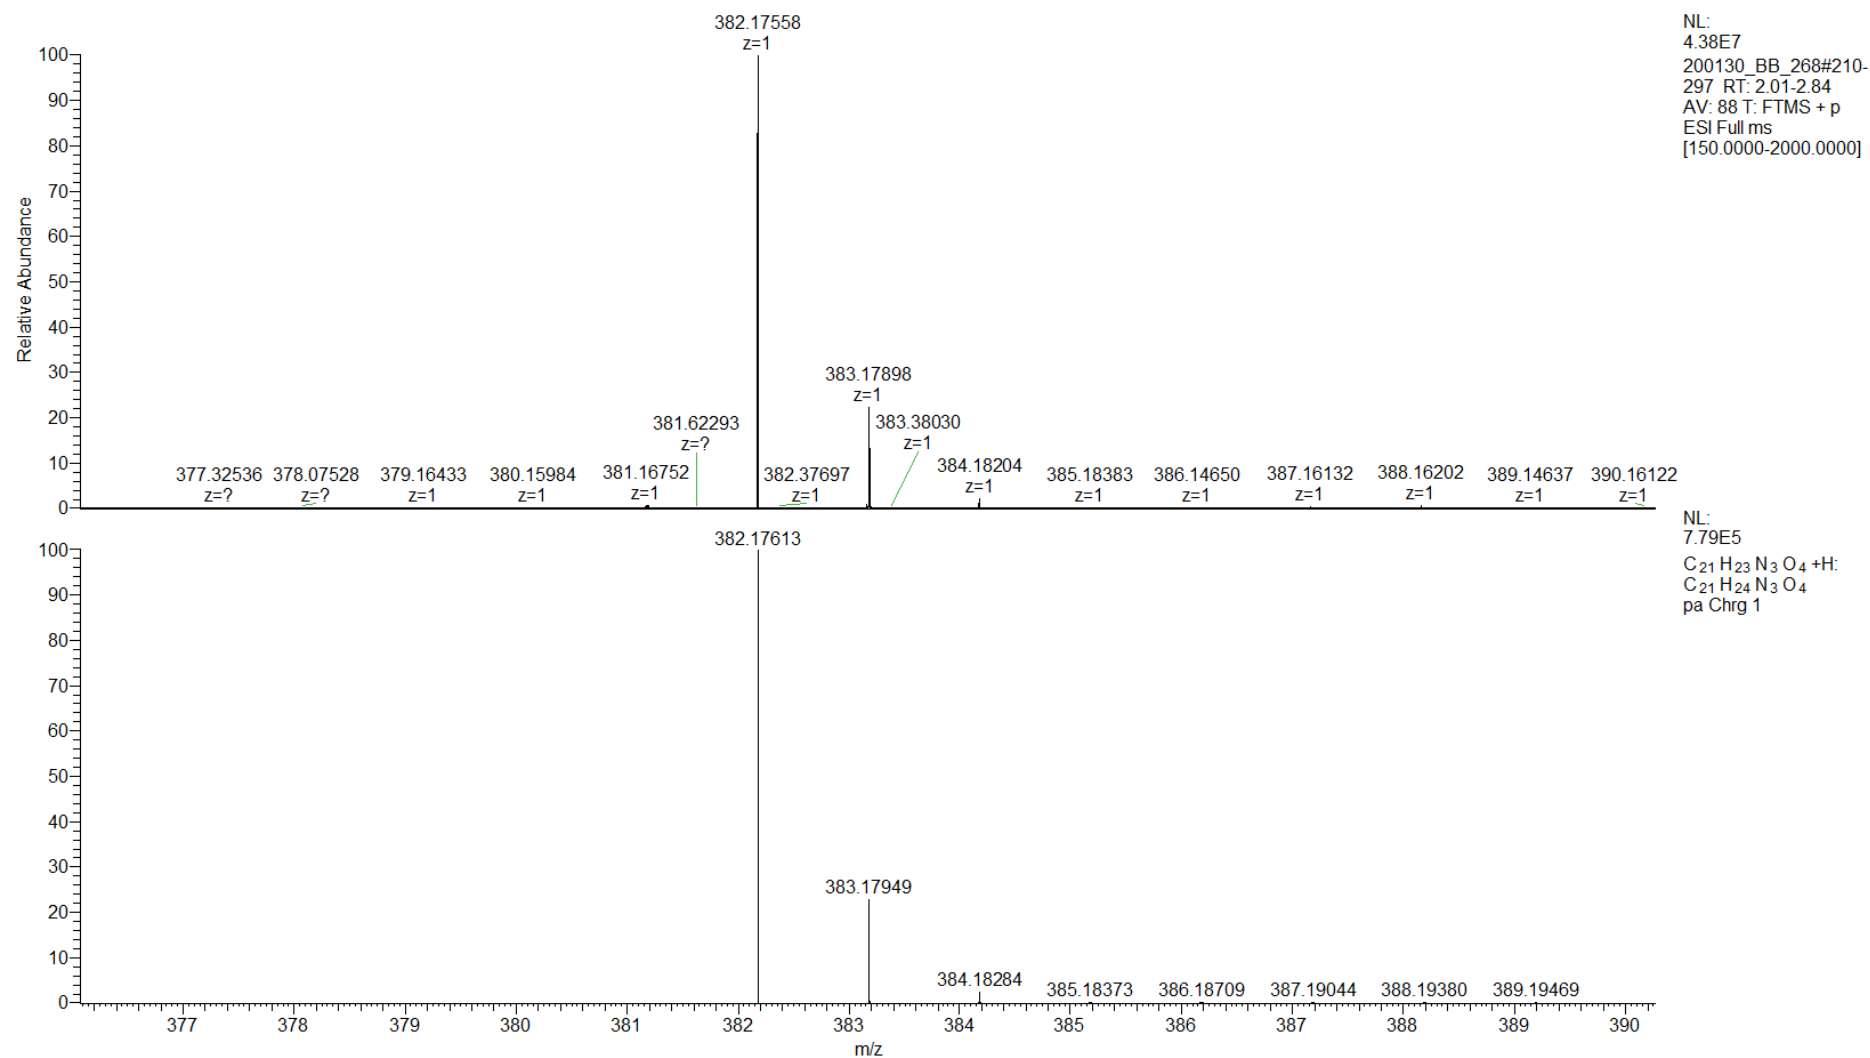

**Figure S108.** ESI HRMS spectrum of *N*-hydroxy-6-(12-methyl-6,11-dioxo-11,12-dihydrodibenzo[*b,f*][1,4]diazocin-5(6*H*)-yl)hexanamide (**7m**).

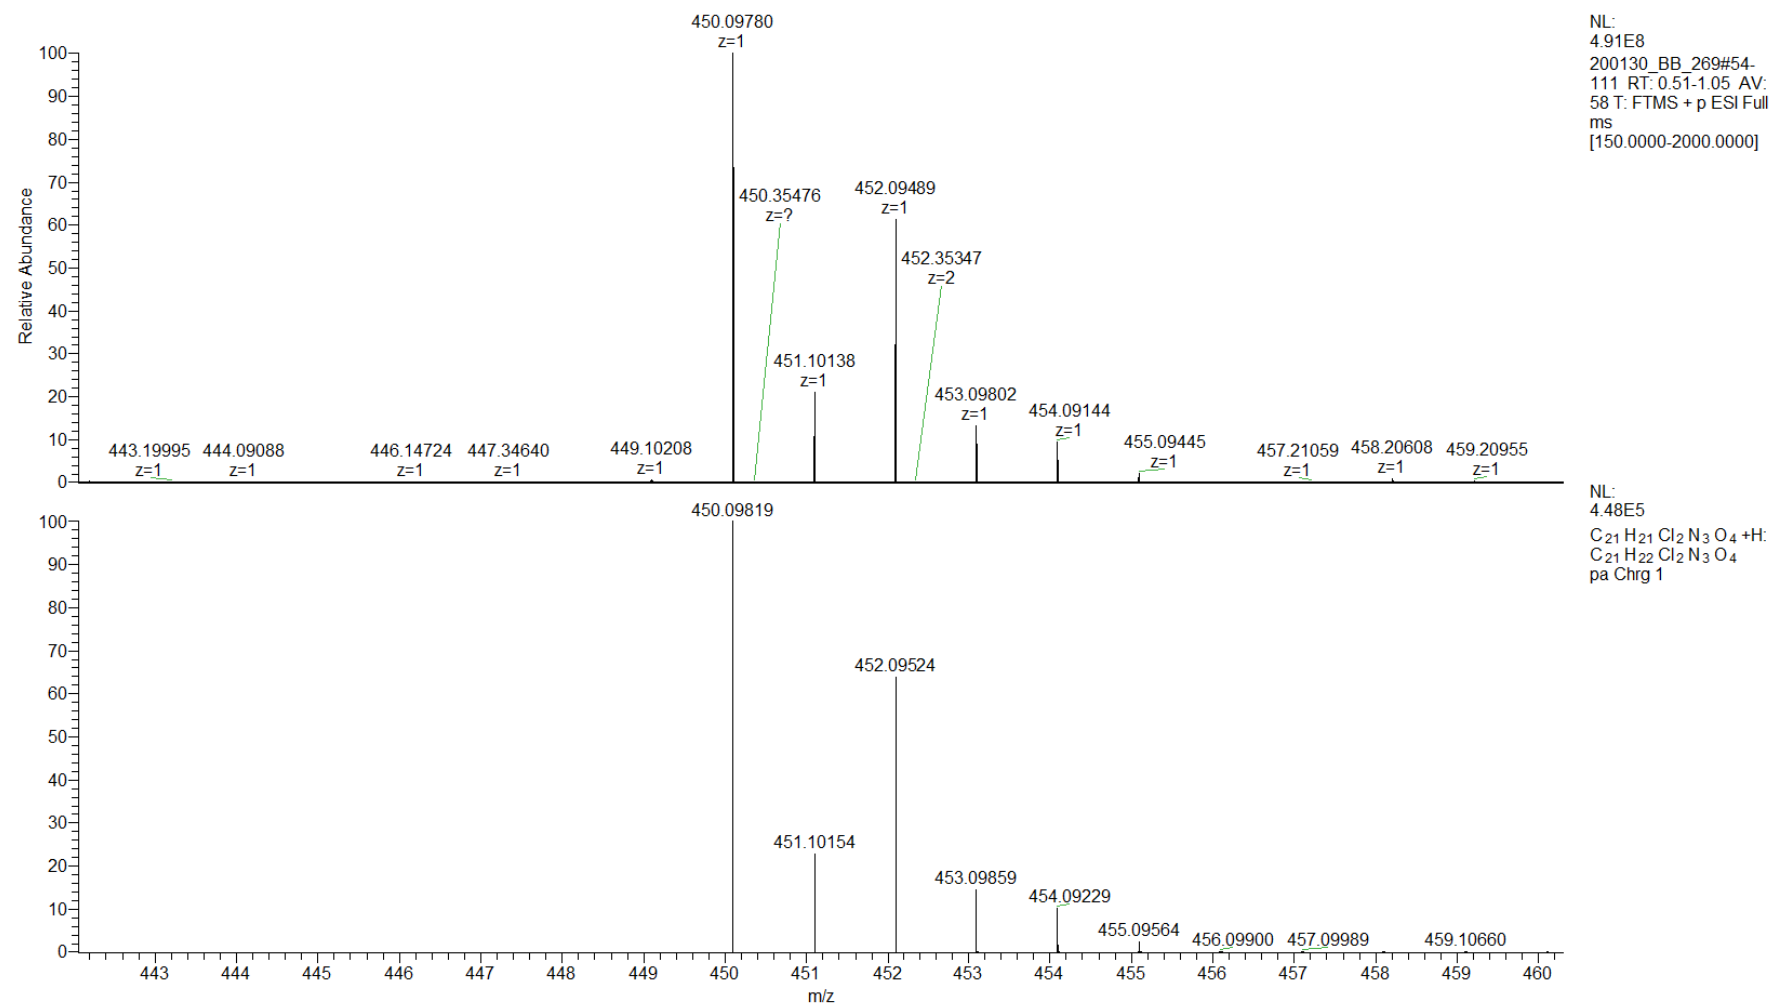

**Figure S109.** ESI HRMS spectrum of *N*-hydroxy-6-(8,9-dichloro-12-methyl-6,11-dioxo-11,12-dihydrodibenzo[*b,f*][1,4]diazocin-5(6*H*)-yl)hexanamide (**7n**).

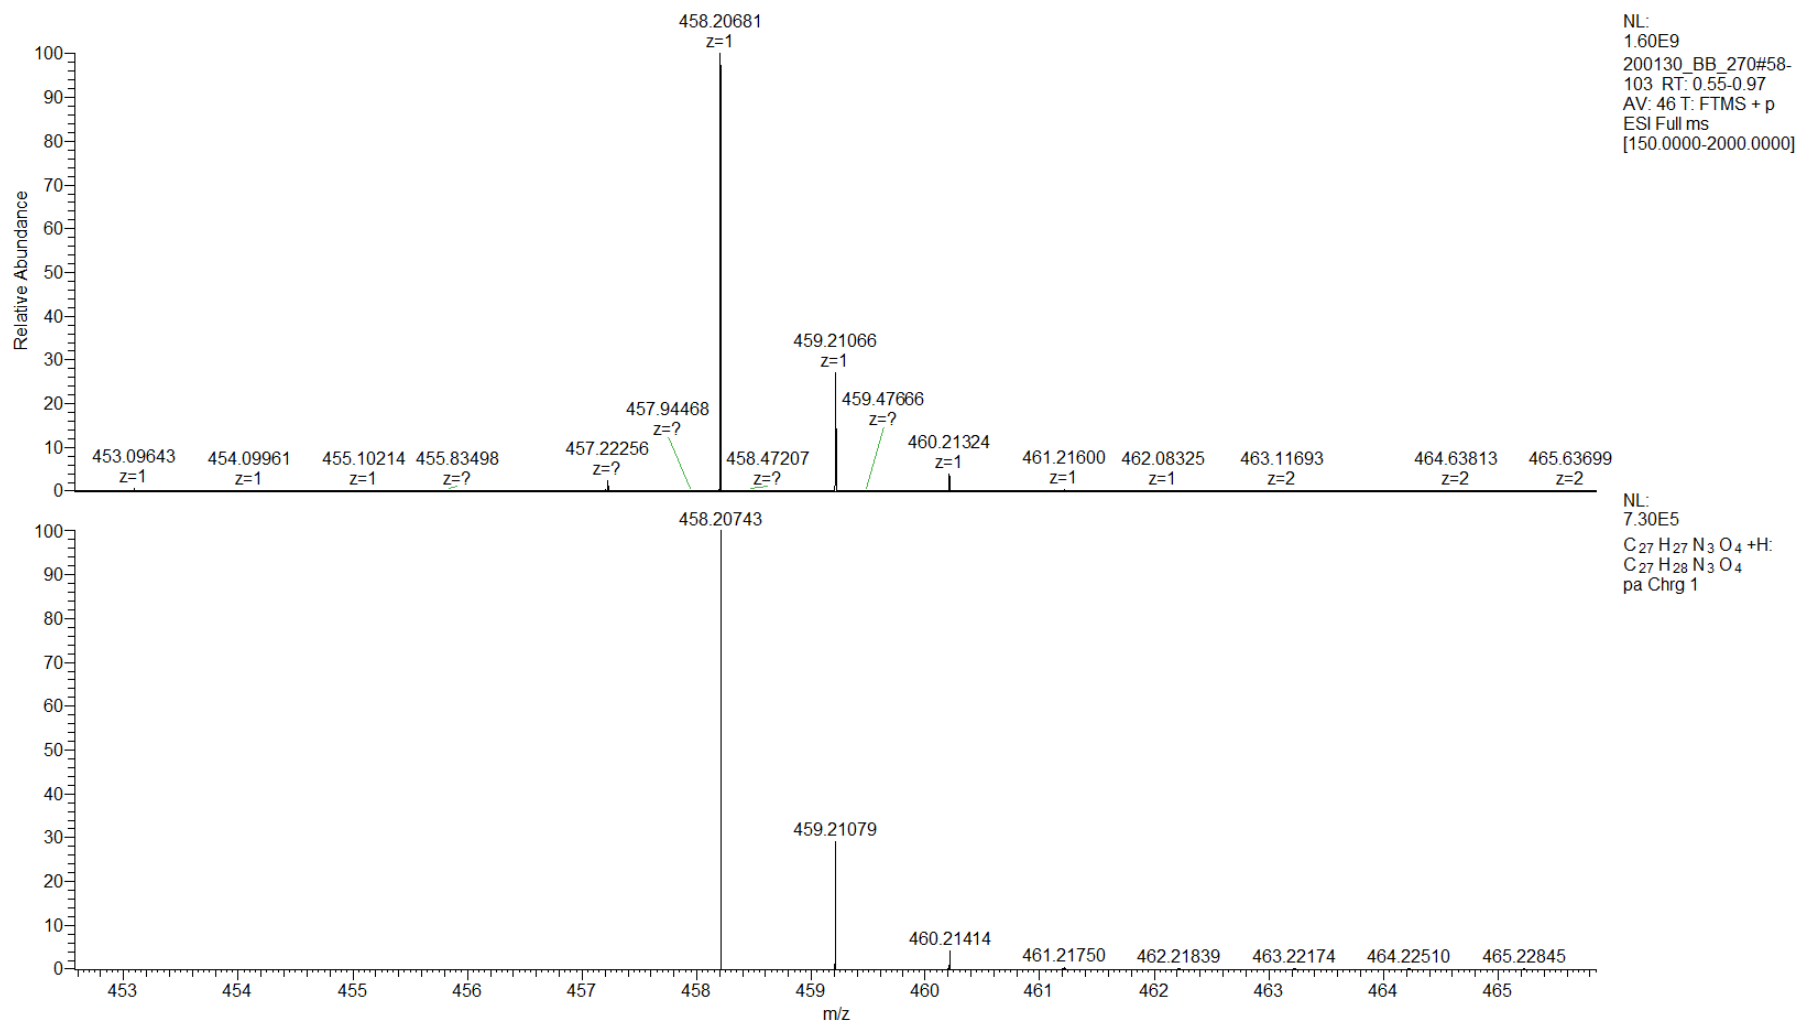

**Figure S110.** ESI HRMS spectrum of *N*-hydroxy-6-(12-benzyl-6,11-dioxo-11,12-dihydrodibenzo[*b,f*][1,4]diazocin-5(6*H*)-yl)hexanamide (**7o**).

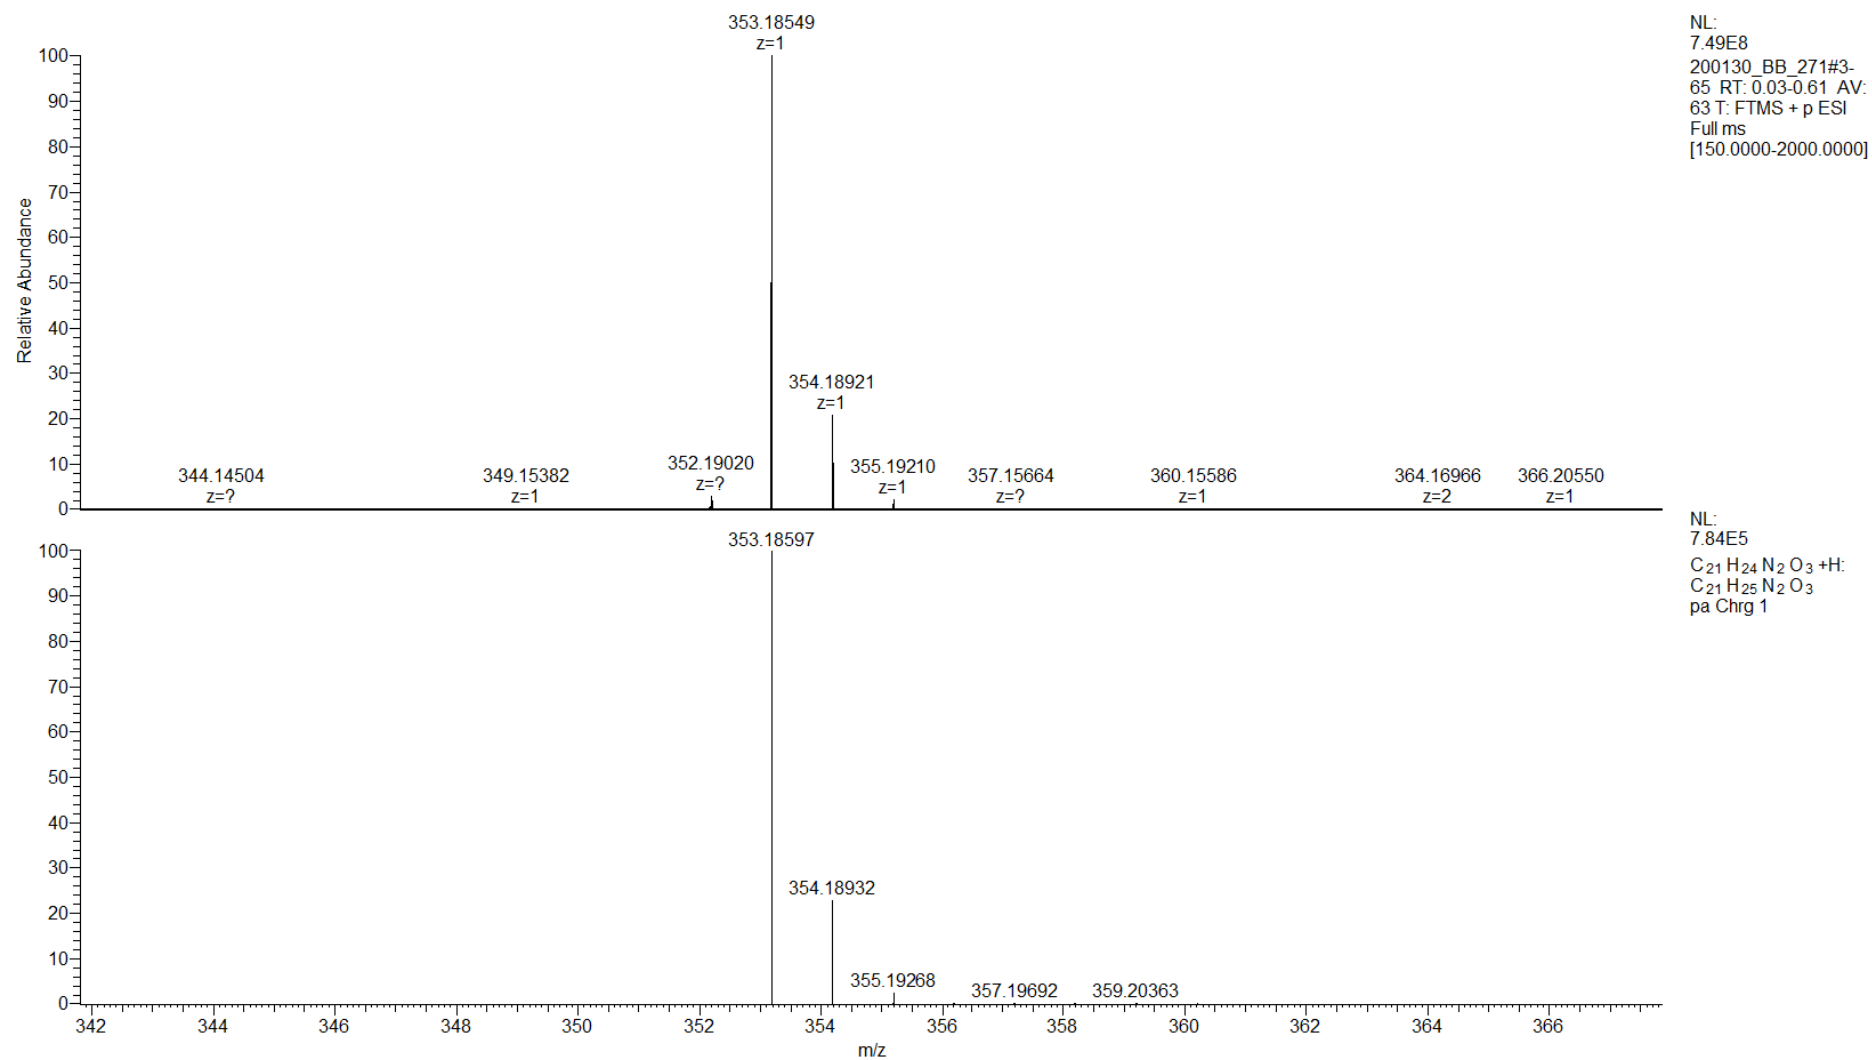

**Figure S111.** ESI HRMS spectrum of *N*-hydroxy-6-(6-oxo-11,12-dihydrodibenzo[*b,f*]azocin-5(6*H*)-yl)hexanamide (**7p**).

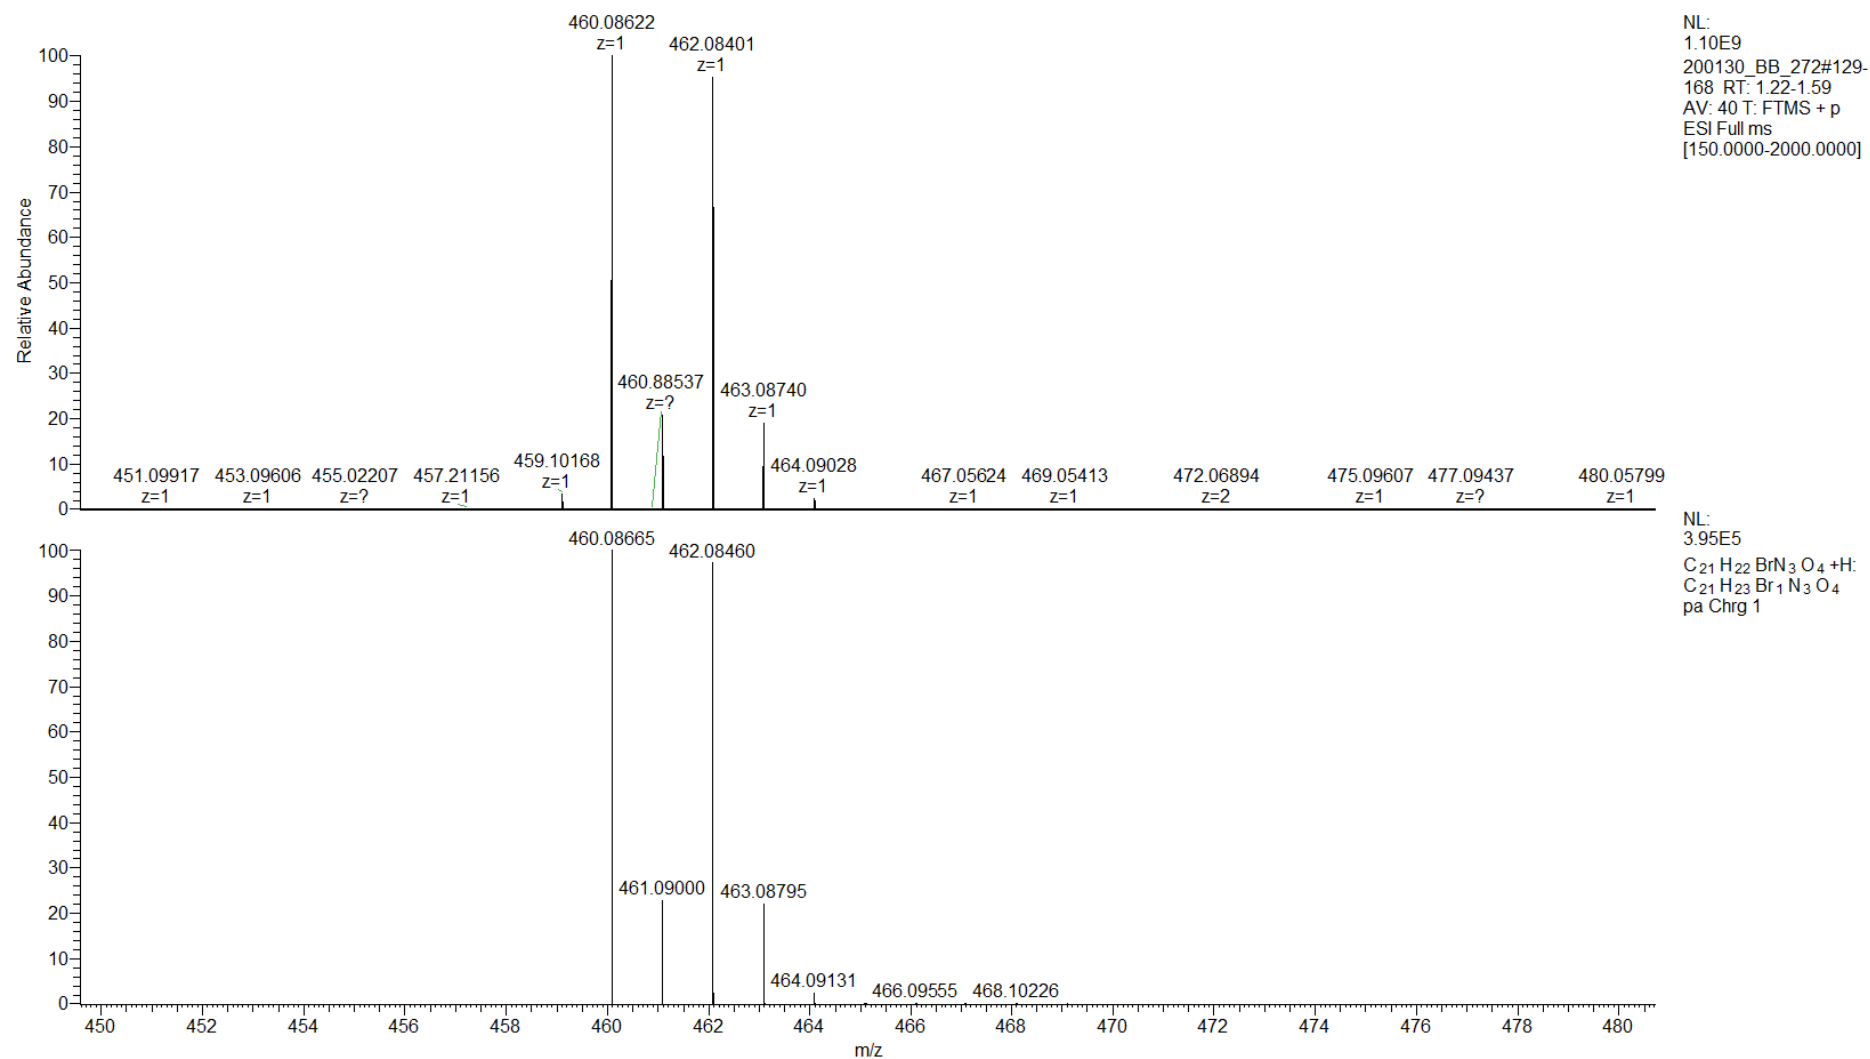

**Figure S112.** ESI HRMS spectrum of *N*-hydroxy-6-(2-bromo-11-methyl-6,12-dioxo-11,12-dihydrodibenzo[*b,f*][1,5]diazocin-5(6*H*)-yl)hexanamide (**7r**).

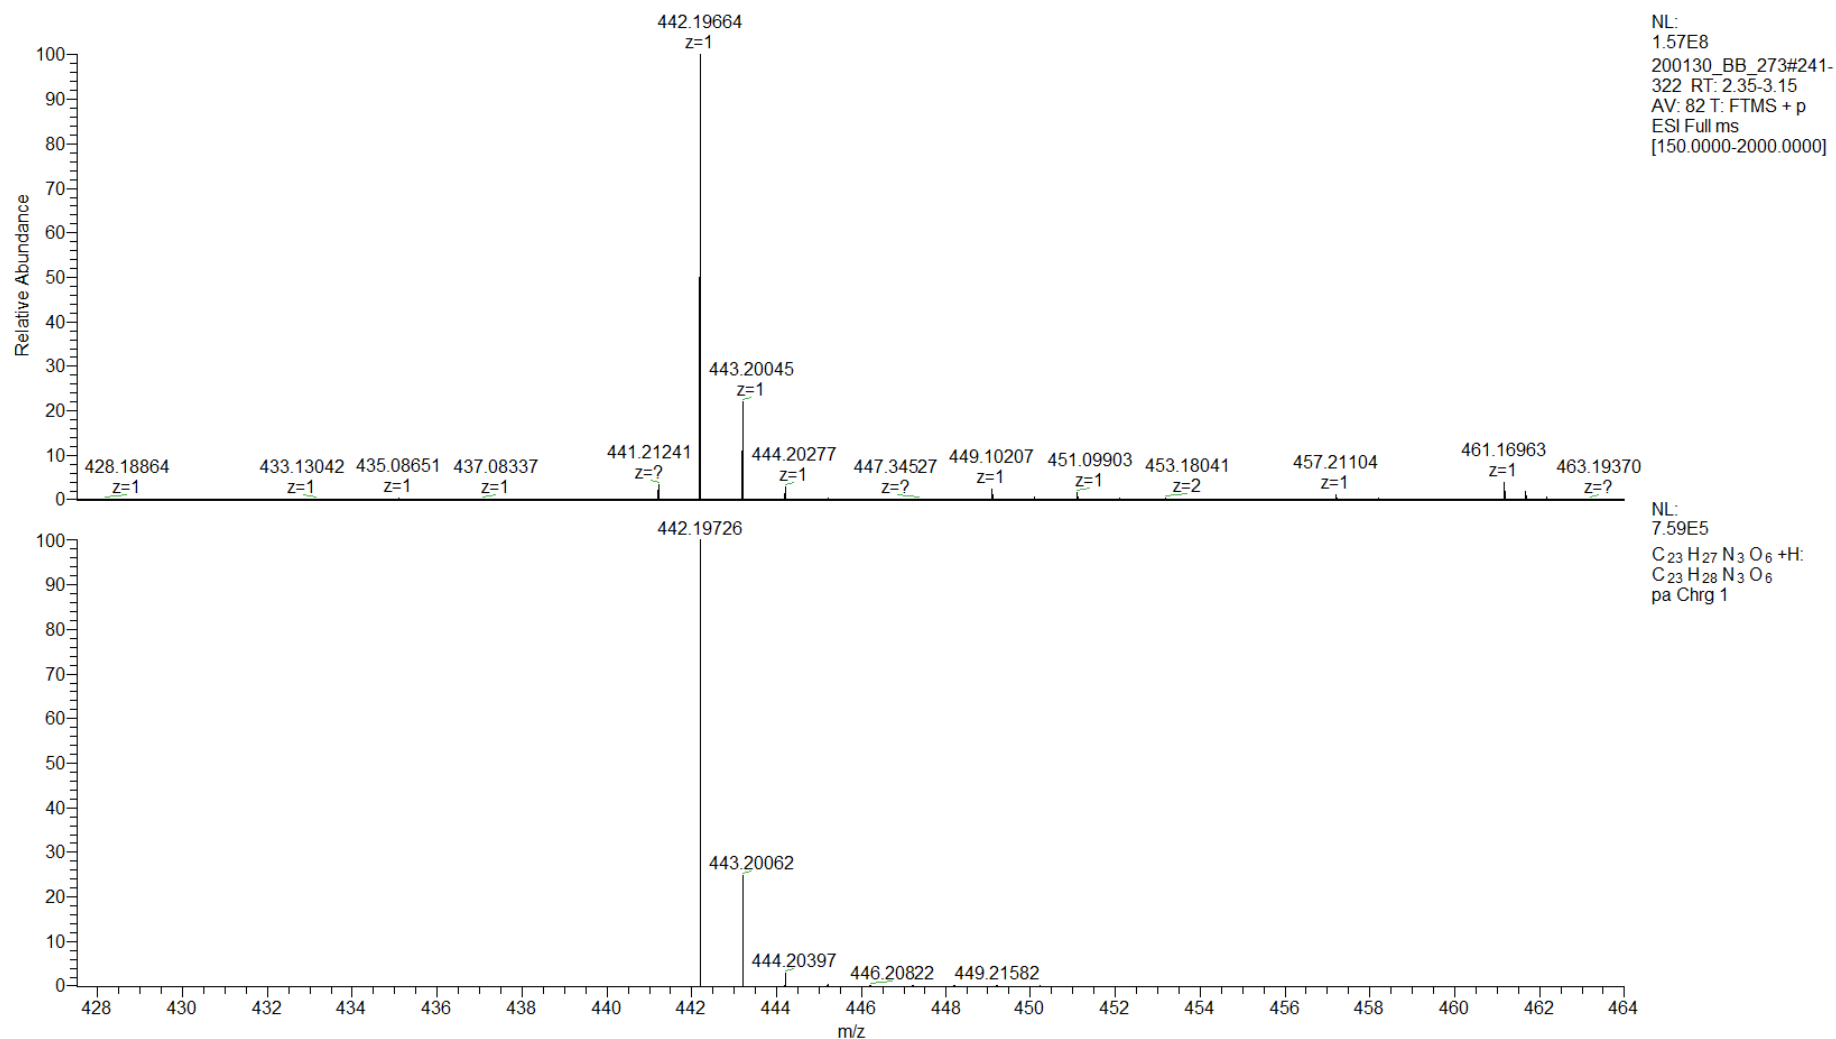

**Figure S113.** ESI HRMS spectrum of *N*-hydroxy-6-(2,3-dimethoxy-11-methyl-6,12-dioxo-11,12-dihydrodibenzo[*b,f*][1,5]diazocin-5(6*H*)-yl)hexanamide (**7s**).

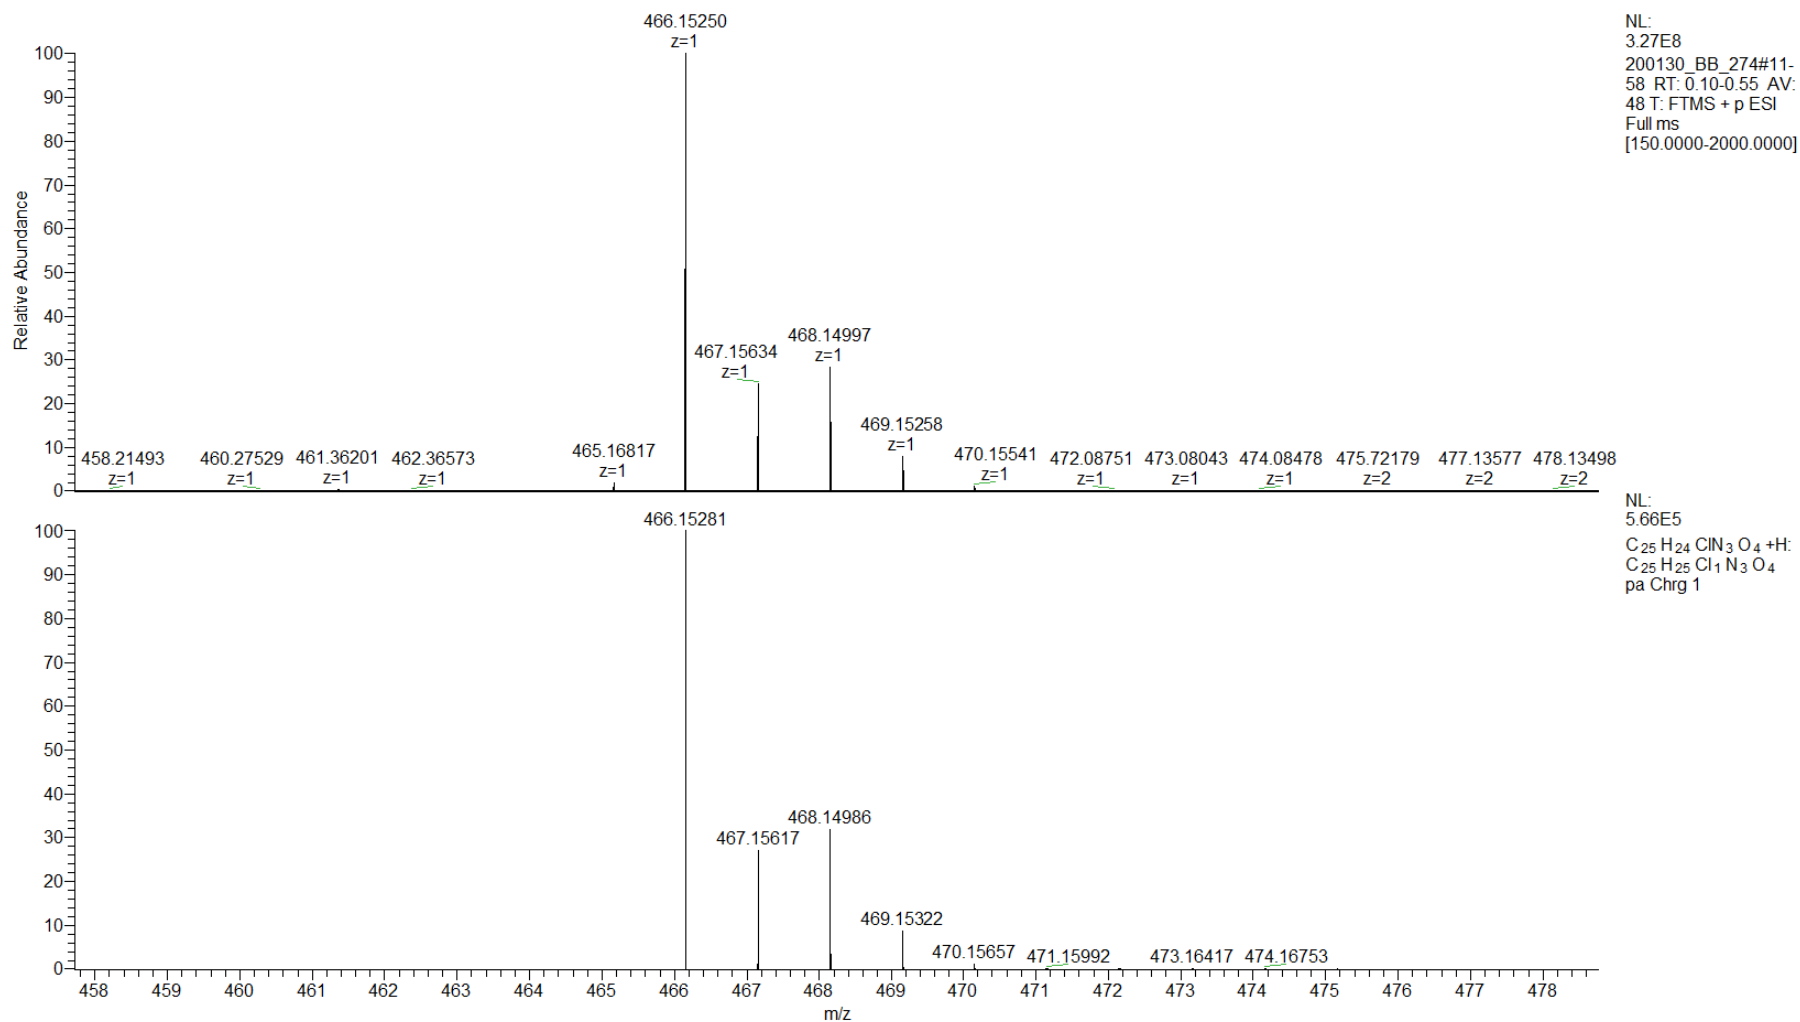

**Figure S114.** ESI HRMS spectrum of *N*-hydroxy-6-(5-methyl-6,14-dioxo-5,14-dihydrobenzonaphtho[2,3-*f*][1,5]diazocin-13(6*H*)-yl)hexanamide (**7t**).
